# Supplementary material for: Genome-Wide Analysis of the Universal Stress Protein Gene Family in Blueberry and Their Transcriptional Responses to UV-B Irradiation and Abscisic Acid
Source: MDPI journal article supplement (doi:10.3390/ijms242316819), 2023-11-27
Supplement: s1 [file s1]

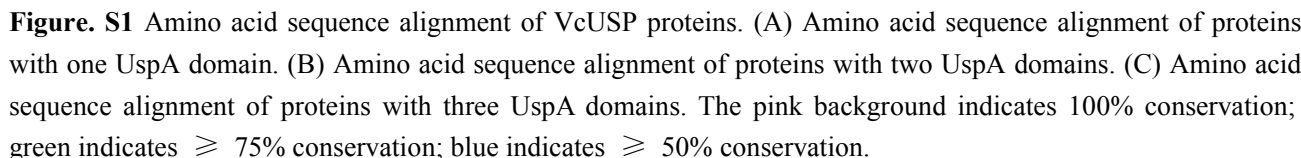

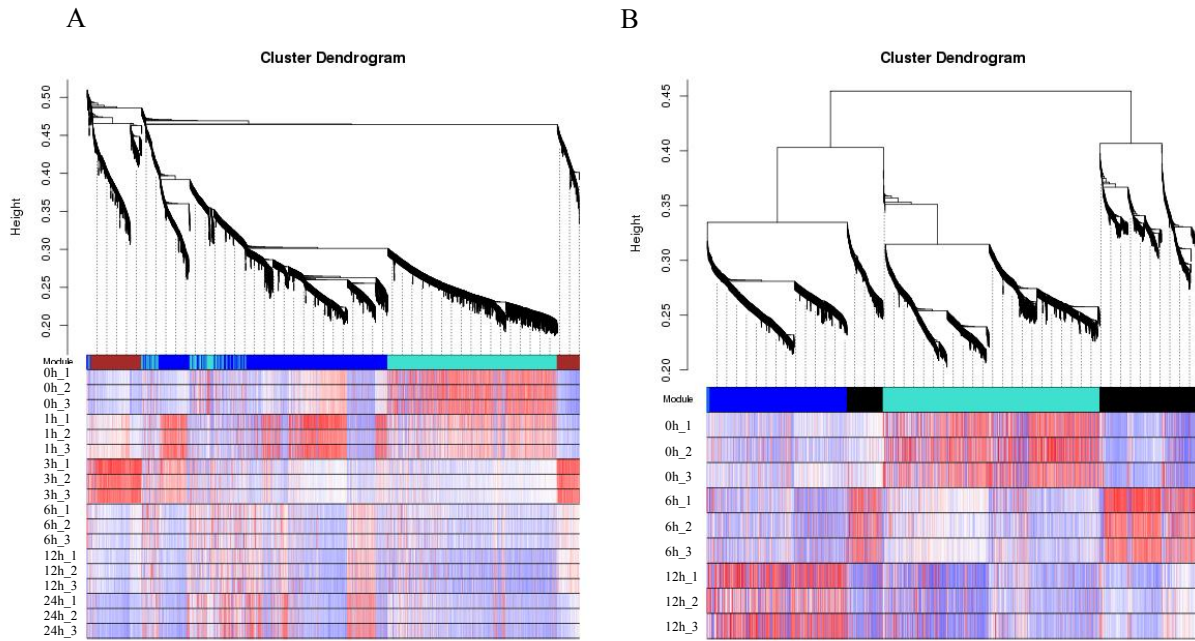

**Figure. S2** Hierarchical clustering tree of the co-expression modules identified by WGCNA under UV-B radiation (A) and exogenous ABA (B) treatment. Different modules are marked by different colors. Each leaf of the cluster tree represents a gene. The darker the color in the corresponding heat map, the higher the correlation between the gene in the module and the treatment.

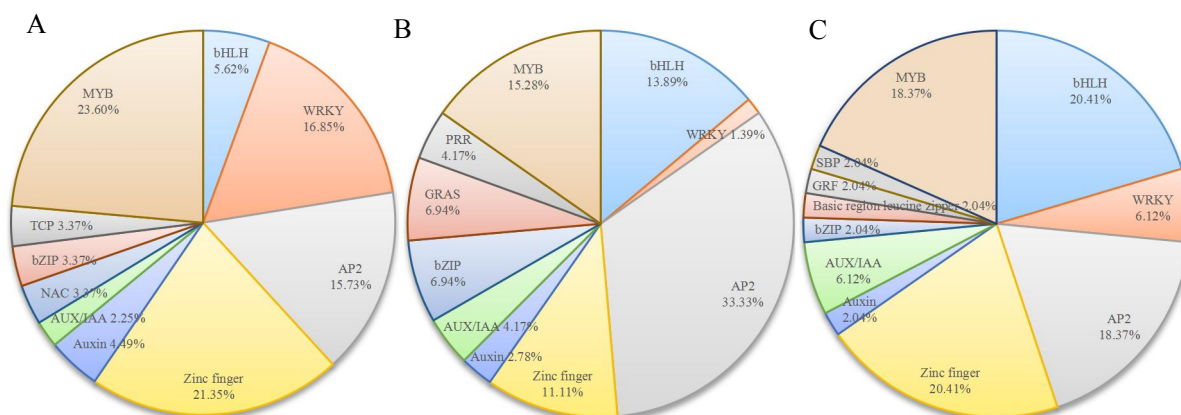

**Figure. S3** Transcription factor family clusters under UV-B radiation or exogenous ABA treatment according to WGCNA. **A** The blue module shows transcription factor family clusters under UV-B radiation. **B** The turquoise module shows transcription factor family clusters under UV-B radiation. **C** The blue module shows transcription factor family clusters under exogenous ABA treatment.
