# Supplementary material for: Genome-Wide Analysis of the Universal Stress Protein Gene Family in Blueberry and Their Transcriptional Responses to UV-B Irradiation and Abscisic Acid
Source: Int J Mol Sci. 2023 Nov 27;24(23):16819. doi: 10.3390/ijms242316819 (PMC10706445; doi:10.3390/ijms242316819)
Supplement: Supplementary file 1 [file ijms-24-16819-s001.zip › Supplementary Tables.xlsx]

## Sheet: Table S1
Table S1 Basic information about VcUSP proteins in blueberry
Gene name	Gene ID	Position	Amino acid sequence	Ii	AI	GRAVY	Pfam_annotation	Swiss_Prot_annotation	NR_annotation
VcUSP1	VaccDscaff9-augustus-gene-4.24	VaccDscaff9:440474..442944 (+)	MAKDRKIGVAMDFSKSSKMALEWAINNLSDKGDTLFIIHIKPHSLGESRNSLWSSSGSPLIPLVEFREPEVMKKYEVETDMEVLDMLDTGSRQKEVTVVAKLYWGDPREKLCEAAEDLKLDSLVMGNRGLGKIQRILLGSVTNYVMTNALCPVTIVKDPDVRKR	32.03	101.67	-0.078	Universal stress protein family	--	Universal stress protein [Actinidia chinensis var. chinensis]
VcUSP2	VaccDscaff4-snap-gene-4.33	VaccDscaff4:450092..456108 (+)	MEPLMEDEEYDWREVKLPSLIPLVPEPELERETGERRRGRDILISVDHGPNSKHAFDWAIVHLCRLADTIHLVHAVASLKNNIVYEATQGLMEKLSMEAYEVAMVKTMARIVEGDAGKAICKEAERLKPAAVVMGTRGRSLIQSVLQGSVSEYCFHNCKTAPIIIVPGKGTLS	33.85	93.24	-0.059	Universal stress protein family	--	Universal stress protein [Actinidia chinensis var. chinensis]
VcUSP3	VaccDscaff4-augustus-gene-31.64	VaccDscaff4:3173844..3176485 (-)	METLMEDEEYEWREVKLPSLIPLVPEPELERETGERRRGRDILISVDHGPNSKHAFDWALVHLCRLADTIHLVHAVASLKNNIVYEATQGLMEKLSMEAYEVAMVKTMARIVEGDAGKAICKEAERLKPAAVVMGTRGRSLIQSVLQGSVSEYCFHNCKTAPIIIVPGKEAGEESVI	38.72	103.41	0.021	Universal stress protein family	--	Universal stress protein [Actinidia chinensis var. chinensis]
VcUSP4	VaccDscaff4-snap-gene-10.54	VaccDscaff4:1044057..1053022 (-)	MQPDSDLPPLSAIKLKPSASPSRFAPSTDTPTSTAQRRIGIAVDLSDESAFAVEWSVHHYLRPGDAVVLVHVRPTSVLYGADWGAVDLSVVNEESKQNLEDEFDKFTVTKADDVAKPLVEAGIPFKIHIVKDHDMKERLCLEVERLGLSAVIMGSRGFGATRRDNSGRLGSVSDYCVRHCVCPVVVVRYPEEKDGGAEPVVSVASAAEEEEEELEYHDATDQRKD	34.88	93.31	-0.016	Universal stress protein family	--	Universal stress protein [Actinidia chinensis var. chinensis]
VcUSP5	VaccDscaff5-augustus-gene-16.25	VaccDscaff5:1611462..1614138 (+)	MHPNQPPPDSDLPLLAAIKVKCSSPRFPPPTPTDTPTANAQRRIGIAVDLSDESAFAVKWSVHHYLRPGDAVILLHVRPTSVLYGADWGAVDVSVDDQESQQKLENEFDTFTVTKSTDLAQPLVDGGIPFKIHIVKDHDMKERICLEVERLGLSAVIMGSRGVGARKRGSSGGLGSVSDYCVRHCVCPVVVVRFPEDEKDSGLENVVEEESEFHDAADHRKDVVRSAAYDMKLFNVPSLNWTWCWTPTITGMV	27.85	97.24	-0.088	Universal stress protein family	--	hypothetical protein C3L33_12974, partial [Rhododendron williamsianum]
VcUSP6	VaccDscaff8-snap-gene-397.80	VaccDscaff8:39693629..39697957 (-)	MNPQPQQSNPNPNPAPPPPAVKVQPSSPSRFTLPTFNSHRRIAIAVDLSDESAYAVKWAVQNYLRQTDDVILLHVRPTSVLYGADWGSTAANPLSEESKQKLEDDFDNFTTTKADDLAQPLVEAQIPFKIHIVKDHDMKERLCLEVERLGLSAVIMGSRGFGAARRNGKGRLGSVSDYCVRHCVCPVVVVRYPDETDGGDDMKGIGEEVDLLHPVPEEEHEYHDTDEDQKEN	35.74	93.78	0.023	Universal stress protein family	--	hypothetical protein C3L33_12974, partial [Rhododendron williamsianum]
VcUSP7	VaccDscaff1-snap-gene-18.55	VaccDscaff1:1845488..1849775 (+)	MNPQPQQPNPNPNPAPPPPAVKVQPSSPSRFTLPTFNSHRRIAIAVDLSDESAYAVKWAVQNYLRQTDDVILLHVRPTSVLYGADWGSTAANPLSEESKQKLEDDFDNFTTTKADDLAQPLVEAQIPFKIRIVKDHDMKERLCLEVERLGLSAVIMGSRGFGAARRNGKGRLGSVSDYCVRHCVCPVVVVRYPDETDGGDDMKGIGEEVDLLHPVPEEEHEYHDADEDQKGGAMIIYYGIQTRHGNNLSVTVSGVSNDMQRE	41.47	93.07	0.025	Universal stress protein family	Putative pectinesterase/pectinesterase inhibitor 26 OS=Arabidopsis thaliana OX=3702 GN=PME26 PE=2 SV=1	hypothetical protein C3L33_12974, partial [Rhododendron williamsianum]
VcUSP8	VaccDscaff15-augustus-gene-328.52	VaccDscaff15:32867456..32870034 (-)	MASPKKPPETEKPPSAILIQPASPRYPLTQSGTPTSTAHRRIAIAVDLSDESAYAVKWAVQNYLRQNDAVILLHVRPTSVLYGADWGAVDDEEKSQQKLEDDFDAFTASKANDLAQPLVEAQIPFKIHIVKDHDMKERLCLEVERLGLSAVIMGSRGIGGGGSRRNGKGRLGSVSDYCVHHCVCPVVVVRYPDDDKEEGGGGEVEEGKAEGVLKPVPEDETEYHDASDKQTGIAVYVSSLISLASAMRLYA	25.3	99.87	0.06	Universal stress protein family	--	universal stress protein PHOS32-like [Camellia sinensis]
VcUSP9	VaccDscaff19-augustus-gene-357.27	VaccDscaff19:35705501..35707386 (-)	MASPKKPPETENPPSAILIQPASPRYPLTQSGTPTSTAHRRIAIAVDLSDESAYAVKWAVQNYLRQNDAVILLHVRPTSVLYGADWGAVDGEEKSRQKLEDDFDAFTASKANDLAQPLVEAQIPFKIHIVKDHDMKERLCLEVERLGLSAVIMGSRGIGGGGSRRNGKGRLGSVSDYCVHHCVCPVVVVRYPDDDKEEGGGGEVEEGKAEEVLRPVPEEETEYHDASDKQTGFMN	15.62	90.24	-0.079	Universal stress protein family	--	Universal stress protein [Actinidia chinensis var. chinensis]
VcUSP10	VaccDscaff34-augustus-gene-252.29	VaccDscaff34:25194567..25201217 (-)	MASPKKPPETEKPPSAILIQPASPRYPLTQSGTPTSTAHRRIAIAVDLSDESAYAVKWAVQNYLRQNDAVILLHVRPTSVLYGADWGAVDDEEKSQQKLEDDFDAFTASKANDLAQPLVEAQIPFKIHIVKDHDMKERLCLEVERLGLSAVIMGSRGIGGGGSRTNGKGRLGSVSDYCVHHCVCPVVVVRYPDDDKEEGGGGEVEEGKAEEVLRPVPEDETEYHDASDKQTVLVERAGESFLSKKKMGQVGYVQKKEADRKAETSGICEKIMRCLGLLVQTLTRSPSRSSQKQAIHPENMEFTKEALAAWPKSSQFSNSGG	20.74	93.84	-0.272	Universal stress protein family	Universal stress protein A-like protein OS=Arabidopsis thaliana OX=3702 GN=At3g01520 PE=1 SV=2	hypothetical protein HYC85_000831 [Camellia sinensis]
VcUSP11	VaccDscaff14-augustus-gene-373.27	VaccDscaff14:37357308..37361554 (-)	MSWQGLPFLTTASQPLFFPGLNLTQSPPSSAPENPTFDQSSQQNQPSPSYTSVSSGVYIHNSAMASPKKPPETENPPSAILIQPASPRYPLTQSGTPTSTAHRRIAIAVDLSDESAYAVKWAVQNYLRQNDAVILLHVRPTSVLYGADWGAVDDEEKSQQKLEDDFDAFTASKANDLAQPLVEAQIPFKIHIVKDHDMKERLCLEVERLGLSAVIMGSRGIGGGGSRRNVKGRLGSVSDYCVHHCVCPVVVVRYPDDDKEEGGGGEVEEGKADEVLRPVPEEETEYHDASDKQTAGRGPQGKLQLQVTPLDLVIAPTVQKCCKIIERE	31.99	96.95	-0.156	Universal stress protein family	--	universal stress protein PHOS32 [Camellia sinensis]
VcUSP12	VaccDscaff2-augustus-gene-427.20	VaccDscaff2:42717814..42722061 (-)	MSWQGLPFLTTASQPLFFPGLNLTQSPPSSAPENPTFDQSSQQNQPSPSYTSVSSAVYLHNSAMASPKKPPETEKPPSAILIQPASPRYPLTQSGTPTSTAHRRIAIAVDLSDESAYAVKWAVQNYLRQNDAVILLHVRPTSVLYGADWGAVDDEEKSQQKLEDDFDAFTASKANDLAQPLVEAQIPFKIHIVKDHDMKERLCLEVERLGLSAVIMGSRGIGGGGSRRNVKGRLGSVSDYCVHHCVCPVVVVRYPDDDKEEGGGGEVEEGKADEVLRPVPEEETEYHDASDKQTGI	32.26	96.94	-0.143	Universal stress protein family	--	hypothetical protein HYC85_013168 [Camellia sinensis]
VcUSP13	VaccDscaff10-snap-gene-17.28	VaccDscaff10:1750450..1757515 (-)	MASSEAKERKILVAVDESDESSYALSWCLKNIVAENSKDTLILLYSKQIPPLYPAMVGTGYLFSTDLMAAVEKYGSEVAESVMETAKSLCKEVKAETKVERGDPRDVICQMTEKLAVDMVVMGSHGYGMIKRWGPFSFFNLFTTP	42.49	83.56	-0.341	Universal stress protein family	Universal stress protein PHOS34 OS=Arabidopsis thaliana OX=3702 GN=PHOS34 PE=1 SV=1	hypothetical protein F0562_008887 [Nyssa sinensis]
VcUSP14	VaccDscaff722-augustus-gene-0.14	VaccDscaff722:19272..24392 (+)	MAGNETKERKILVAVDEGEESTYALSWCLKNIVAENSKDTLILLYAKQPPTLYPAMDGMGYLFSTEIIASMEKYGNEMAESVMEKAKRLCKDDHDVKVETRVECGDPRDVICQMAEKLGVDMVVMGSHGYGMIKRAFLGSVSNYCAHSLKCPVLIVKRPKSAASAPAPNK	40.22	83.12	-0.259	Universal stress protein family	Universal stress protein PHOS34 OS=Arabidopsis thaliana OX=3702 GN=PHOS34 PE=1 SV=1	universal stress protein PHOS34 [Sesamum indicum]
VcUSP15	VaccDscaff1-augustus-gene-355.19	VaccDscaff1:35537455..35541588 (-)	MAGSETKERKILVAVDEGEVSSYALSWCLKNIVAENSKDTLILLYSKHPPTLYPATDGTEIIASMEKYGNEVAELVMEKAKRLCNEVHDVKVQTRVECGDPRDVICHMVEKLGVDMVVMGSHGYGMIKRWGPFSFFNLLTSYTLRPNHSLPTAGILVKPC	47.32	75.17	-0.62	Universal stress protein family	Universal stress protein PHOS32 OS=Arabidopsis thaliana OX=3702 GN=PHOS32 PE=1 SV=1	hypothetical protein HYC85_012096 [Camellia sinensis]
VcUSP16	VaccDscaff5-augustus-gene-335.18	VaccDscaff5:33488732..33492635 (-)	MAGNETKERKILVAVDEGEESTYALSWCLKNIVAENSKDTLILLYSKQPPTLYPAMDGMGYLFSTEIIASMEKYGNEMAESVMEKAKRLCKDDHHVKVETRVECGDPRDVICQMAEKLGVDMVVMGSHGYGMIKRWGPFSFFNHFWY	39.25	76.6	-0.557	Universal stress protein family	Universal stress protein PHOS32 OS=Arabidopsis thaliana OX=3702 GN=PHOS32 PE=1 SV=1	hypothetical protein HYC85_012096 [Camellia sinensis]
VcUSP17	VaccDscaff24-processed-gene-209.25	VaccDscaff24:20937512..20949439 (-)	MAGNETKERKILVAVDEGEESSYALSWCLKNIVAENSKDTLILLYSKHPPTLYPAMDGTEIIASMEKYGNEVAELVTEKAKRLCNEVHDGFSGECK	49.28	77.57	-0.523	Universal stress protein family	Universal stress protein PHOS32 OS=Arabidopsis thaliana OX=3702 GN=PHOS32 PE=1 SV=1	Universal stress protein [Actinidia chinensis var. chinensis]
VcUSP18	VaccDscaff15-snap-gene-164.35	VaccDscaff15:16424826..16429175 (+)	MAGSEAKERKILVAVDEGEESAYALSWCLKNIVAENSKDTLILLYCKSPPPLYPAMDGTGYLFSDDLIASMEKYSTELAASVMEKANGLCKEVNDVKVETRVERGDPRGVICKMAEKLGVDIVVMGSHGYGMIKRAFLGSVSNHCAQNVKCPVLIVKRPKSAAPNNCSQQII	58.43	77.87	-0.473	Universal stress protein family	Universal stress protein PHOS32 OS=Arabidopsis thaliana OX=3702 GN=PHOS32 PE=1 SV=1	Universal stress protein [Actinidia chinensis var. chinensis]
VcUSP19	VaccDscaff24-processed-gene-210.3	VaccDscaff24:21031367..21032257 (+)	MASSEAKERKILVAVDEGEESTYALSWCLKNIVAENSKDTLILLYAKQPPTLYPAMDGMGYLFSTEIIASMEKHGNEVAESVMEKAKRLCKDDHDVKVETRVECGDPRDVICQMAEKLGVDMVVMGSHGYGMIKRFRNRMAGSEAKERKILAAIDGGEESTNALSWCLKNIVAENSKDTLILLYSKKPLPFYPATDGPGYPFSTDLAASVERYNTELAESVMEKAKGLCKEVPDVKVETRVERGDPRDVICQMTEKLGADMLVMGTHGYGMIKRTFLGSVSNHCAQNVKCPVLIVKRPETSAPAPNK	59.21	75.1	-0.498	Universal stress protein family	Universal stress protein PHOS32 OS=Arabidopsis thaliana OX=3702 GN=PHOS32 PE=1 SV=1	Universal stress protein [Actinidia chinensis var. chinensis]
VcUSP20	VaccDscaff15-processed-gene-169.12	VaccDscaff15:16926770..16932179 (+)	MAGSEAKERKILAAIDGGEESTNALSWCLKNIVAENSKDTLILLYSKQPLRFYPATDGPGYPFSTDLAASVERYNTELAESVMEKAKGLCKEVPDVKVETRVERGDPRDVICQMTEKLGADMLVMGTHGYGMIKRTFLGSVSNHCAQNVKCPVLIVKRPETSAPAPNK	44.43	75.64	-0.546	Universal stress protein family	Universal stress protein PHOS32 OS=Arabidopsis thaliana OX=3702 GN=PHOS32 PE=1 SV=1	Universal stress protein [Actinidia chinensis var. chinensis]
VcUSP21	VaccDscaff11-augustus-gene-187.18	VaccDscaff11:18690826..18694485 (+)	MAGSETKERKILVAVDEGEESSYALSWCLKNIVAENSKDTLILLYSKHPPTLYPAMDGTEIIASMEKYGNEVAELVMEKAKRLCNEVHDVKVETRVECGDPRDVICHMVEKLGVDMVVMGSHGYGMIKRAFLGSVSNHCAHNVKCPILIVKRPKSAAPNK	42.36	84.3	-0.38	Universal stress protein family	Universal stress protein PHOS32 OS=Arabidopsis thaliana OX=3702 GN=PHOS32 PE=1 SV=1	Universal stress protein [Actinidia chinensis var. chinensis]
VcUSP22	VaccDscaff8-augustus-gene-404.35	VaccDscaff8:40401707..40405148 (-)	MGDWIEISSGSERRVGEEKEEFWSKRLIAVAIDKDNGSQYALKWAVDNLVTKGQTLVLCRIFVTYMSFHQKERFHPQDQHLVQHQLSPHCVTKFNTKPESKQIEKVFLVAHCYPCLVLLLGLGDWLPDLQLLVPRTPESVRSQSLI	43.97	83.45	-0.256	Universal stress protein family	--	universal stress protein A-like protein [Camellia sinensis]
VcUSP23	VaccDscaff10-augustus-gene-391.40	VaccDscaff10:39156406..39159810 (-)	MDVRKIVAIVEDVEVARTALNWALHHLVRHGDLVTLLHVFPYSKSRSRNKLRLRRLKAFQLALSFKDICSDFPNAKIEIVVREGDQEGGTIAAVVREIGASTLVVGIHNRSFLYKLPMAHSNIASNFNCKVVAIKQPTPPLTTRNTNISSPNILDVSQIEIAAGLSIRDILPPKIPYRICPDPYAIIWRSRKTRRRRRNS	43.67	87.14	-0.152	Universal stress protein family	--	universal stress protein A-like protein [Camellia sinensis]
VcUSP24	VaccDscaff2-augustus-gene-303.26	VaccDscaff2:30354286..30357570 (-)	MMRVRMRLPGFCMSRATTAHVRVNNTQSQQCKQSHNSLYGNREAEFSDNSIEVNFDGDAMLKPESKGGNRVMVVVDSGLESKGALQWTLSHSVQSQDTIVLLHVAKPSRQGANSIRNRAYELLCSMKDMCQTRRPEVRVEVAVVEGKEQEKGPTIVKEAKQERASLLVLGKKKQSMIQRLRTIWRGKKTRGRAVEYCIQNANCMTIAVRRKSRKYGGYLITTKRHKNFWLLA	39.98	94.06	-0.094	Universal stress protein family	--	universal stress protein A-like protein [Camellia sinensis]
VcUSP25	VaccDscaff20-augustus-gene-130.27	VaccDscaff20:13076648..13082672 (-)	MGRTTGVKMPSFCLNRIRPHARVRSPPVQSKNDPKTSLKNEDSGDVIKPPIGRKIMIVVDSSMEAKGAVQWALTHTVQSHDIVILLHVTKPSNQGEVTSKKIAPRVSEFLQSMKKMCQQRRPEVRIEVAVAEGKEKGPTIVEEAKKQGVAMLVLGQKKQSVTWRLLVTWAGNRAGGGGVVEYCIQNCSCVAIGVRRKSKKLGGYLITTKRHKDFWLLA	38.27	97.51	0.155	Universal stress protein family	--	uncharacterized protein LOC114305966 isoform X2 [Camellia sinensis]
VcUSP26	VaccDscaff32-augustus-gene-297.41	VaccDscaff32:29766127..29769237 (+)	MWNQRGNANGNDNDNGGDQRRDEAVLVAIDKDKSSQFALKWAIDNLLSKGQTVTLIHVKQRPASIPTPLGSQVAVSDVNDGVAKAFKAQVDNQAKELFLPFRAFSPTAVVVNITYPLSEEQISTDVLGQRSVYVKECESHRSTISLSKKPQSPYSEDEVEAEMRRLKQELMQTMEMYSIACKEALTAKQKVLTQARAQADNGPVFKCFLDHTPVAVKVLRPDAAQGRSQFQQEDEVEAEMRRLKQELKQTMEMYNTACKEALTAKQKAMELHRWKIEEQHRLEQAQLAEEAALAMAEKEKAKTKAAIEAAEAAQRIAEPEAQKRMNALKESEEKKKVLDVLAHSDLRYCKYTIEEIESATENFSNSRTIGGGDGFLKDQEKERNRPVAVEKSDGLWLEK…	33.78	82.46	-0.301	Universal stress protein family	Universal stress protein A-like protein OS=Arabidopsis thaliana OX=3702 GN=At3g01520 PE=1 SV=2	hypothetical protein C3L33_01606, partial [Rhododendron williamsianum]
VcUSP27	VaccDscaff16-augustus-gene-32.17	VaccDscaff16:3268896..3272810 (+)	MASSEAKERKILVAVDEGEESSYALSWCLKNIVAENSKDTLILLYSKQPPTLYPAMDRPDLMASVEKYNSEVAESVMEKAKSLCKEVKVETKVDRGDPRDVICQMTEKLGVDMVVMGSHGYGMIKRINNYEI	27.1	84.02	-0.185	Universal stress protein family	Universal stress protein A-like protein OS=Arabidopsis thaliana OX=3702 GN=At3g01520 PE=1 SV=2	hypothetical protein C3L33_18970, partial [Rhododendron williamsianum]
VcUSP28	VaccDscaff18-snap-gene-364.36	VaccDscaff18:36400889..36404768 (+)	MWNQRGNANGNVNDNGGDQRRDEAVLVAIDKDKSSQFALKWAIDNLLSKGQTVTLIHVKQRPASIPTPYSFGGIALCYFALWFSFISYVGSQVTVSDVNDGVAKAFKAQVDNQAKELFLPFRAFCTRKDVTPTAVVVNITCPLSEEQISINVLGQRSVYVKECESHRSTISLSKKPQAPNSEVANLQQKIDDQAKTLTKYSRTLTIVQGLLQVLAAKAGIDPTEVQELLIDRNNTVEGTSGEENDVANTSRKEDDVAGTSE	31.31	76.78	-0.288	Universal stress protein family	Universal stress protein A-like protein OS=Arabidopsis thaliana OX=3702 GN=At3g01520 PE=1 SV=2	hypothetical protein C3L33_18970, partial [Rhododendron williamsianum]
VcUSP29	VaccDscaff16-snap-gene-338.32	VaccDscaff16:33850901..33859540 (-)	MEGSATPTPTRKVMVVADPTRESAAALQYALSHGVVDHDTLILLHVENPNAWKNPFAFFKWPTPSTSSTASALSSSSSFTDGGGGGGGELDFLEAMKHASEIAQPNVRVQVEKVEMEGKEKAAVILNYSTLHSVDIIVIGQKRTLSNAILGQRKNGSVRGLDTAEYLIENSKCTCVAVQKKGQNAGFLLNTKTHKNFWLLA	56.56	85.43	-0.204	Universal stress protein family	Universal stress protein PHOS34 OS=Arabidopsis thaliana OX=3702 GN=PHOS34 PE=1 SV=1	hypothetical protein HYC85_020296 [Camellia sinensis]
VcUSP30	VaccDscaff18-snap-gene-58.34	VaccDscaff18:5857083..5862956 (+)	MTSSSRSFLRQLSGRGEDEGWESTSKRWRSGTDGDGLNNNKNRAYGGCSERRLKEMEEEGFKKMMMCGGGGGGGGDSSSGCGGGVVVRKRVMVVVDQSSHSKHAMMWALSHVVTNKGDLLTLLHIIPPSNSQERAAGSHDTINDPHNSGNSSSINSPNYLATSLASLCKACKPEVEVEALVIQGPKLATVMSQVKKLEVSVLVLGQKKPSPLLLNCLCGSGGGGTEKFVEQCINNVECLTIGVRKQSKGIGGYLISTRWQKNFWLLA	51.92	96.94	0.089	Universal stress protein family	Universal stress protein PHOS34 OS=Arabidopsis thaliana OX=3702 GN=PHOS34 PE=1 SV=1	hypothetical protein HYC85_020296 [Camellia sinensis]
VcUSP31	VaccDscaff31-processed-gene-287.14	VaccDscaff31:28717946..28721709 (-)	MEGSATPTPTRKVMVVADPTRESAAALQYALSHGVVDHDTLILLHVENPNAWKNPFAFFKWPTPSTSSTASALSSSSSFTDGGGGGGGELDFLEAMKHASEIAQPNVRVQVEKVEMEGKEKAAVILNYSTLHSVDIIVIGQKRTLSNAILG	47.56	90.93	-0.062	Universal stress protein family	Universal stress protein PHOS34 OS=Arabidopsis thaliana OX=3702 GN=PHOS34 PE=1 SV=1	universal stress protein PHOS34-like isoform X2 [Camellia sinensis]
VcUSP32	VaccDscaff47-snap-gene-186.39	VaccDscaff47:18639311..18650832 (+)	MDAAAAVAGGNGKKVMVAIDESESSYHALMWVLKNLRESITASGSPLHIFMAYPLPVNSNVFAASLGSARLYCPVSATSEYVYCVQEQNKVVSLGILEKAKSICTTHGVNAETIAQLGDPKQAICDAAQKHKIELLVLGDCELGKIQRFFVGSVSNYCVRNAKCPVLVVKKPE	26.78	90.58	0.044	Universal stress protein family	Universal stress protein PHOS34 OS=Arabidopsis thaliana OX=3702 GN=PHOS34 PE=1 SV=1	hypothetical protein HYC85_032250 [Camellia sinensis]
VcUSP33	VaccDscaff22-snap-gene-362.49	VaccDscaff22:36198981..36209659 (+)	MEEEGRSGDSSNESGVEEKRKVMVAIDESDCSHYALEWALQNLGDALVKSEFFIFTVQPIADYTYLYASSFGAAPPDLVRSFQENQKKFSLALLEKAKGICNKYGIVAETLTEVGNPKEAICEAVEKLDIQLLVLGSQGRGVIKRALLGSVSNYCAHNAKCPVLVVKKTV	22.44	94.92	0.12	Universal stress protein family	Universal stress protein PHOS34 OS=Arabidopsis thaliana OX=3702 GN=PHOS34 PE=1 SV=1	hypothetical protein HYC85_032250 [Camellia sinensis]
VcUSP34	VaccDscaff46-augustus-gene-198.27	VaccDscaff46:19830725..19839113 (+)	MEKGRNSSNYIGIEEKKKVMVAIEESECSHYALEWALQNLGNSIANAHLFIFTVQPNPDDTCMYMPTDVARSFQENQKKFSLAVLEKAKEICSKYGISAETMTEVGNPKEVICEAVEKFHIQLLVLGSHSRGALKRAFLGSVSNYCAHHAKCQLLLHHRDAISASDNEGSDALLMKQGGDEVGAMMNQIGWIGLPKVVSLMVPTPPSPSRVSTLLIAWGKTLGMRLSPSRTKALNIWGQGSRNGSPYRK	28.02	85.71	-0.039	Universal stress protein family	Universal stress protein PHOS34 OS=Arabidopsis thaliana OX=3702 GN=PHOS34 PE=1 SV=1	hypothetical protein HYC85_032250 [Camellia sinensis]
VcUSP35	VaccDscaff43-augustus-gene-11.33	VaccDscaff43:1129792..1140080 (-)	MEKGRNSSSYIGIEEKKKVMVAIEESECSHYALEWALQNLGNSIANAHLFIFTVQPNPDDTCMYMPTDVARSFQENQKKFSLAVLEKAKEICSKYGISAETMTEVGNPKEVICEAVEKFHIQLLVLGSHSRGALKRAFLGSVSNYCAHHAKCQLLLHHRDAISASDNEGSDALLMKQGGDEVGAMMNQIGWIGLPKVVSLMVPTPPSPSRVSTLLIAWGKTLGMRLSPSRTKAL	43.04	62.5	-0.43	Universal stress protein family	E3 ubiquitin-protein ligase RFI2 OS=Arabidopsis thaliana OX=3702 GN=RFI2 PE=1 SV=2	hypothetical protein C3L33_04035, partial [Rhododendron williamsianum]
VcUSP36	VaccDscaff46-processed-gene-198.6	VaccDscaff46:19839778..19850115 (+)	MAGSEAKERKILVAVDEGEESTYALSWCLKNIVAENSKDTLILLYSKPPPPLYSAMDGTAYLFSTEIIASMEKYGNDMAESVMEKANSLCKEVKVETRVEHGDPRDVICKMAEKLDVDMVVMGSHGYDFQVVRSSSSFSNRMASSEAKERKILVAVDEGEESSYALSWCLKNIVAENSKDTLILLYSKQPPTLYPAMDRPDLMASVEKYNSEVAESVMEKAKSLCKEVKVETKVERGDPRDVICQMTEKLGVDMVVMGSHGYGMIKSEAKERKILVAVDEGEESTYALSWCLKNIVAENSKDTLILLYSKHPPTLYPPMVGMEIMASVEKYSSEVAESVMEKAKSLCKEVHDVKVETKVERGDPRDVICQMTEKLAVDTVVMGSHGYGMIKRAFLGSVS…	40.04	65.69	-0.416	Universal stress protein family	E3 ubiquitin-protein ligase RFI2 OS=Arabidopsis thaliana OX=3702 GN=RFI2 PE=1 SV=2	hypothetical protein C3L33_04035, partial [Rhododendron williamsianum]
VcUSP37	VaccDscaff15-snap-gene-379.37	VaccDscaff15:37959955..37973966 (+)	MEGGAGAVESGERTRIMVGVNESTIKGYPHASISSKGAFDWTLSKIVRSNTSSFTLLFLHVQVPDQDGFDDMDSIYASPDDFKKLNHKNKIKGLHLLEYFVNRCHEIGVPCEAWIKRGDPKEVICHEVNRVQPDLLVVGSRGLGPFQRVFVGTVSEFCAKHAECPVITIKRKVDEAPQDPIDD	37.13	78.06	-0.203	Universal stress protein family	E3 ubiquitin-protein ligase RFI2 OS=Arabidopsis thaliana OX=3702 GN=RFI2 PE=1 SV=2	hypothetical protein C3L33_07616, partial [Rhododendron williamsianum]
VcUSP38	VaccDscaff11-snap-gene-388.42	VaccDscaff11:38782963..38799236 (+)	MAGAGVEPEPTRIMVGVNESTIKGYPHASISSKGAFEWTLKKIVRSNFSGFKLLFLHVQVSDEDDGIPNADLSLKKIIRIDIVSFPTQHASVGLCLVRGSLQFGFDDMDSVYASPDDFKKMNRRDMTRGVHLLEYFVNRCHELGVSCEAWLKKGDPKEVICHEVNRVQPDFLVVGSRGLGPFQKVFVGTVSEFCAKHADCPVITIKRKADEAPQDPVDD	35.5	73.82	-0.302	Universal stress protein family	E3 ubiquitin-protein ligase RFI2 OS=Arabidopsis thaliana OX=3702 GN=RFI2 PE=1 SV=2	hypothetical protein C3L33_07616, partial [Rhododendron williamsianum]
VcUSP39	VaccDscaff51-augustus-gene-12.23	VaccDscaff51:1199457..1203387 (-)	MAGAGVEPEPTRIMVGVNESTIKGYPHASISSKGAFEWTLKKIVRSNFSGFKLLFLHVQVSDEDGFDDMDSVYASPDDFKKMNRRDMIRGVHLLEYFVNRCHELGVSCEAWLKKGDPKEVICHEVNRVQPDFLVVGSRGLGPFQKVFVGTVSEFCAKHADCPVITIKRKADEAPQDPVDD	16.62	98.76	0.204	Universal stress protein family	Universal stress protein PHOS34 OS=Arabidopsis thaliana OX=3702 GN=PHOS34 PE=1 SV=1	hypothetical protein HYC85_032250 [Camellia sinensis]
VcUSP40	VaccDscaff24-snap-gene-10.36	VaccDscaff24:1025648..1029588 (-)	MEGENAAPDEEHREHRSNWGAMSPEIVEIGEDTKSTVTISSRDCGLNYVYVAVGKNDLDVVKWALDHAVSPGATVFLVHVFPSITYISTPVGRLARSQLNQEQVQFYVNEENNKRRNLLQKYIRLCTDAKVSVDTILLESNSTAKAILELIPVLNITYLVMGTKRPASSRRLIRGIGKGEFVQKNAPDYCEVAIVYDGKKLMDGHKVVPSALPSGHRRPEITRQSERNFFDCICFSAKSD	24.56	97.08	0.074	Universal stress protein family	Universal stress protein PHOS34 OS=Arabidopsis thaliana OX=3702 GN=PHOS34 PE=1 SV=1	hypothetical protein HYC85_032250 [Camellia sinensis]
VcUSP41	VaccDscaff46-augustus-gene-204.29	VaccDscaff46:20445461..20446873 (-)	MSGPGRLGCVIVAVDGSEESMNALRWALDNLKLRSHPSDSSGHFLILHVQSPPNIAAGLNPGPIPFGGPSDLDVPAFAAAIEAHQRRISEAILTNALQICSEKNVKNVKTQVMVGDPKEKICEAIEVLHAELLVMGSRAFGPIKRMFLGSVSNYCVNNAPCPVTIVKGTS	32.54	85.9	-0.154	Universal stress protein family	--	hypothetical protein C3L33_03978, partial [Rhododendron williamsianum]
VcUSP42	VaccDscaff45-augustus-gene-135.37	VaccDscaff45:13506640..13509063 (-)	MPPSPAASPPPRPPPMIDEVETESIGDFETDGRAQTTLCFDQHPSPRDTAIKVPKDLEAIGKQYPFQRGKWNKELLAIAVQQQLIDSYYSQLSQAMSGPGRLGCVIVAVDGSEESMNALRWALDNLKLRSHPPDSSGHFLILHVQSPPNIAAGLNPGPIPFGGPSDLDVPAFAAAIEAHQRRISEAILTNALQICSEKNVKNVKTQVMVGDPKEKICEAIEVLHAELLVMGSRAFGPIKRMFLGSVSNYCANNAPCPVTIVKGTS	29.91	90.7	-0.079	Universal stress protein family	Universal stress protein PHOS34 OS=Arabidopsis thaliana OX=3702 GN=PHOS34 PE=1 SV=1	Universal stress protein A-like protein [Actinidia chinensis var. chinensis]
VcUSP43	VaccDscaff27-snap-gene-133.25	VaccDscaff27:13307433..13310423 (-)	WNGILSLTFPKLTIYLPHKDANLASHHHYETLSKESPQNFSHLILFSDFDNMATAEKPVMVVGIDDSEQSVYALEWALDHFFTPFAPNFPFTLIVLHAKPSSTSAIGLAGPGAADVLPYVEADLKKIASGVIGKAKEICLSKSVNEATLEVVEGDPRNVLCEAVEKHHASMLVVGSHGYGAIKRAVLGSVSDYCAHHAHCSVIIVKKPKIKH	36.2	80.12	-0.324	Universal stress protein family	--	universal stress protein A-like protein [Ziziphus jujuba]
VcUSP44	VaccDscaff34-snap-gene-182.38	VaccDscaff34:18211104..18221591 (+)	MDTGSAPHVFDEMLVRRVRLKHNFLGDFTRETIVPRSSCGLSVKLVRREVEELFTAAEHQQLIDSYYSQLSQAMSGPGRLGCVIVAVDGSEESMNALRWALDNLKLRSHPPDSSGHFLILHVQSPPNIAAGLNPGPIPFGGPSDLDVPAFAAAIEAHQRRISEAILTNALQICSEKNVKNVKTQVMVGDPKEKICEAIEVLHAELLVMGSRAFGPIKRYNSFERVIMISLGTWLWSFDEDTTTSQFVFQLAFTDMMERFKKIVNVGCS	35.08	80.36	-0.316	Universal stress protein family	--	Rossmann-like alpha/beta/alpha sandwich fold [Cynara cardunculus var. scolymus]
VcUSP45	VaccDscaff27-augustus-gene-133.16	VaccDscaff27:13293394..13295352 (-)	MQLRSSVNIPHGNPVVCLVVTLVVNCPSIIVILSQTLPKESPQHFSHLILFSDFDNMATAEKPVMVVGIDDSEQSVYALEWALDHFFAPFAPNFPFTLIVLHAKPSSTSAIGLAGPGAADVLPYVEADLKKIASGVIGKAKEICLSKSVNEATLEVVEGDPRNVLCEAVEKHHASMLVVGSHGYGAIKRAVLGSVSDYCAHHAHCSVIITLGAMDDLNGDENTTSSSSSVPCSICLDLVTDNGDRSIAKLQCGHEFHLDCIGSAFNVKGAMQCPNCRKVERGQWLFASGPTSSFPEFVIDDWTPDDYLFNYSEVPLGVHWCPFGGLAQRHQAIFAEHTSASSVAHSYVAYLGPIPPVSSNTNESVEDPNFNHHWNGISGQNDIFTAHGFPVIDVQYQSW…	31.56	90.69	-0.098	Universal stress protein family	Universal stress protein PHOS32 OS=Arabidopsis thaliana OX=3702 GN=PHOS32 PE=1 SV=1	Universal stress protein A-like protein [Actinidia chinensis var. chinensis]
VcUSP46	VaccDscaff45-snap-gene-135.49	VaccDscaff45:13482667..13486060 (-)	WNGILSLTFPKLTIYLPHKDANLASHHHYETLSKESPQNFSHLILFSDFDNMATAEKPVMVVGIDDSEQSVYALEWALDHFFAPFAPNFPFTLIVLHAKPSSTSAIGLAGPGAADVLPYVEADLKKIASGVIGKAKEICLSKSVNEATLEVVEGDPRNVLCEAVEKHHASMLVVGSHGYGAIKRAVLGSVSDYCAHHAHCSVIIKKTLGAMDDLNGDENTTSSSSSVPCSICLDLVTDNGDRSIAKLQCGHEFHLDCIGSAFNVKGAMQCPNCRKVERGQWLFASGPTSSFPEFVIDDWTPDDYVFNYSEVPLGVHWCPFGGLAQRHQAIFAEHTSASSVAHSYVAYLGPIPPVSSNTNESVEDPNFNHHWNGISGQNDIFTAHGFPVIDVQYQSWGHH…	38.86	83.33	-0.392	Universal stress protein family	--	Universal stress protein A-like protein [Actinidia chinensis var. chinensis]
VcUSP47	VaccDscaff17-augustus-gene-170.28	VaccDscaff17:16979562..16981705 (-)	MATAEKPVMVVGIDDSEQSVYALEWALDHFFTPFAPNFPFTLIVLHAKPSSTSAIGLAGPGAADVLPYVEADLKKIASGVIGKAKEICLSKSVNEATLEVVEGDPRNALCEAVEKHHASMLVVGSHGYGAIKRAVLGSVSDYCAHHAHCSVIIVKKPKIKH	36.43	89.5	-0.181	Universal stress protein family	Universal stress protein PHOS32 OS=Arabidopsis thaliana OX=3702 GN=PHOS32 PE=1 SV=1	Universal stress protein A-like protein [Actinidia chinensis var. chinensis]
VcUSP48	VaccDscaff17-augustus-gene-170.30	VaccDscaff17:16992614..16994702 (-)	MATTEKPVMVVGIDESEQSIYALEWALDHFFAPHAPNLHFNLVVVHAKPSPISVVGIGGPGTFISSISSGTGQDLPFVDVYLKKVAAGLIEQAKEMCISKSAHGARLEVVEGDARNVLCDAVEKHHASVLVVGSHGYGAIKSTLGSQDTDAMDDPIGDQKTTSLFEVSSISCSICLDFVTDDGTRSTAKLQCGHEFHLDCIGSAFNSKGVMQCPNCRKVEKGRWLYATGSSYSFPEFSFEDWPADEDPREFSYSEMPSRVHWCPFSGVVQVHSSIVEVESPPTTYHNLHRHHAVFSDQQTAASPVAHSYVAYFGPIPPPTTSNTSDNVEDPNFNHPWNGLSGHNEVFTARTFPVLGIRHQNRGHHSHPFSANSGHVNSADQASIPPPTLRSTRGDYDTL…	36.96	81.47	-0.211	Universal stress protein family	Universal stress protein PHOS32 OS=Arabidopsis thaliana OX=3702 GN=PHOS32 PE=1 SV=1	Universal stress protein A-like protein [Actinidia chinensis var. chinensis]
VcUSP49	VaccDscaff27-augustus-gene-133.19	VaccDscaff27:13323921..13327203 (-)	MATTEKPVMVVGIDESEQSIYALEWALDHFFAPHAPNLHFNLVVVHAKPSPISVVGIGGPGTFISSISSGTGQDLPFVDVYLKKVAAGLIEQAKEMCISKSAHGARLEVVEGDARNVLCDAVEKHHASVLVVGSHGYGAIKSTLGSQDTDAMDDPIGDQKTTSLFEVSSISCSICLDFVTDDGTRSTAKLQCGHEFHLDCIGSAFNSKGVMQCPNCRKVEKGRWLYATGSSYSFPEFSFEDWPADEDPREFSYSEMVSESRIFTPPLSFGESVETQAVNISLGKLMGKLNQKVLWAHSIGHDVRIYLYKSMIREVESPPTTYHNLHRHHAVFSDQQTAASPVAHSYVAYFGPIPPPTTSNTSDNVEDPNFNHPWNGLSGHNEVFTARTFPVLGIRHQNR…	33.6	72.93	-0.301	Universal stress protein family	Universal stress protein PHOS32 OS=Arabidopsis thaliana OX=3702 GN=PHOS32 PE=1 SV=1	Universal stress protein A-like protein [Actinidia chinensis var. chinensis]
VcUSP50	VaccDscaff17-processed-gene-170.18	VaccDscaff17:17015294..17017395 (-)	MATTEKPVMVIGVDDSEPGTYALEWALDHFFGPHAPNFHFDLVVVHAKPSPISFIGIAGPGTGQALPYIDADLKKIAATVIEKAKETCISKSVHGPKLEIVEGDARNVLCEAVEKHHASVLVVGSHGYGAIKRNFCTATKMATSEKPVMVVGVDDSEQSIYALEWALDHFFAPHAPNFHFDLVIVHAKPSPISVVGMGGPGSGQALPYVDADLKKIAARVIEQVKELCISKSAHGATLEVVEGDARNVLCEAVEKHNASVLVVGSHGYGAIKRAVLGSVSDYCAHHAHCSVMIKLVHSYEMATTEKPVMVVGIDESEQSIYALEWALDHFFAPHAPNLHFNLVIVHAKPSPISVVGIGGPGDARNVLCDAVEKHHASVLVVGSHGYGAIKRAVLGSVSD…	35.56	87.29	-0.112	Universal stress protein family	--	Universal stress protein A-like protein [Actinidia chinensis var. chinensis]
VcUSP51	VaccDscaff27-snap-gene-133.30	VaccDscaff27:13345616..13349558 (-)	MHWKSVGLSTLFCGRQHFPSPSLSIYKTFPRAEHSRKTREDFSTATKMATTEKPVMVIGVDDSEPGTYALEWALDHFFAPHAPNFHFDLVVVHAKPSPISFIGIAGPGTGQALPYIDADLKKIAATVIEKAKETCISKSVHGPKLEIVEGDARNVLCEAVEKHHASVLVVGSHGYGAIKRNFCTATKMATSEKPVMVVGVDDSEQSIYALEWALDHFFAPHAPNFHFDVIVHAKPSPISVVGMGGPGSGQALPYVDADLKKIAARVIEQVKELCISKSAHGATLEVVEGDARNVLCEAVEKHNASVLVVGSHGYGAIKRAVLGSVSDYCAHHAHCSVMIVKKPKNKH	29.2	82.69	-0.063	Universal stress protein family	--	Universal stress protein A-like protein [Actinidia chinensis var. chinensis]
VcUSP52	VaccDscaff34-snap-gene-182.37	VaccDscaff34:18179965..18192014 (+)	MEEYGDGSSGILMMRNKDMRRIVVAVDESEESMYALSWCLTNLLSQETKTNNTVVLLYVKPPPPAYSSLDPTGYLFAGDVVANMEKYSRDLANSVMNRAEEVYRGFNTTTIKVEKKIGSGDAKNVICVAAEKLGADVLVMGSHDYGFFKRALLGSVSDYCSKHVKCPLVVVKRPKNIA	29.31	83.57	-0.269	Universal stress protein family	Universal stress protein PHOS32 OS=Arabidopsis thaliana OX=3702 GN=PHOS32 PE=1 SV=1	Rossmann-like alpha/beta/alpha sandwich fold [Cynara cardunculus var. scolymus]
VcUSP53	VaccDscaff27-processed-gene-133.14	VaccDscaff27:13350301..13356080 (-)	MHWKNVGLSTLFCGRQHFPSPSLSIYKTFPRAEHSRKTREDFSTATKMATTEKPVMVIGVDDSEPGTYALEWALDHFFAPHAPNFHFDLVVVHAIPSPISFIGIAGPGTGQALPYIDADLKKIAATVIEKAKETCISKSVHGPKLEIVEGDARNVLCEAVEKHHASVLVVGSHGYGAIKRNFCTATKMATSEKPVMVVGVDDSEQSIYALEWTLDHFFAPHAPNFHFDLVIVHAKPSPISVVGMGGPGSGQALPYVDADLKKIAARVIEQVKELCISKSAHGATLEVVEGDARNVLCEAVEKHNASVLVVGSHGYGAIKRAVLGSVSDYCAHHAHCSVMIKLVHSYEMATTEKPVMVVGIDESEQSIYALEWALDHFFAPHAPNLHFNLVIVHAKPSPI…	30.26	85.61	-0.352	Universal stress protein family	Universal stress protein PHOS32 OS=Arabidopsis thaliana OX=3702 GN=PHOS32 PE=1 SV=1	hypothetical protein TEA_027897 [Camellia sinensis var. sinensis]
VcUSP54	VaccDscaff27-processed-gene-133.4	VaccDscaff27:13327670..13332486 (-)	MAGSEAKERKILVAVDEGEESAYALSWCLKNIVAENSKDTLILLYCKPPPPLYPAMDGTGYLFSDDLIASMEKYSTELAESVMEKAHSLCKEVKVETRVERGDPRGVICKMAEKLGVDIVVMGSHGYGMIKSEAKERKILVAIDEGEECTNALLWCLKNIVAENSKDTLILLYCKPPPPLYPAMDRTCIFALPLE	33.42	96.05	-0.064	Universal stress protein family	--	Rossmann-like alpha/beta/alpha sandwich fold [Cynara cardunculus var. scolymus]
VcUSP55	VaccDscaff45-snap-gene-135.50	VaccDscaff45:13518438..13526925 (-)	MAGSEAKERKILVAVDEGEESAYALSWCLKNIVAENSKDTLILLYSKPPPPLYSAMDGTAYLFSTEIIASMEKYGNDMAESVMEKAKGLCKEVKVETRVERGDPRDVICKMAEKLGVDMVVMGSHSYGLIKRAFLGSVSNHCVQNVKCPVLIIFKSSDQAVKFSNRMASSEAKERKILVAVDEGEESSYALSWCLKNIIAENSKDTLILLYSKQPPTLYPAMDRPDLIASMEKYSSEVAESVMEKAKSLCKEVKVETKVERGDPRDVICQMTEKLGVDMVVMGTHGHGMIKRAFLGSVSNYCVQNVKCPVLIVKRPKSTTPNP	29.47	86.87	-0.183	Universal stress protein family	Universal stress protein PHOS32 OS=Arabidopsis thaliana OX=3702 GN=PHOS32 PE=1 SV=1	Rossmann-like alpha/beta/alpha sandwich fold [Cynara cardunculus var. scolymus]
VcUSP56	VaccDscaff17-processed-gene-170.19	VaccDscaff17:17018831..17021999 (-)	MAGSEAKERKILVAVDEGEESAYALSWCLKNIVAENSKDTLILLYSKPPPPLYSAMDGTAYLFSTEIIASMEKYGNDMAESVMEKANSLCKEVKVETRVERGDPRDVICKMAEKLGVDMVVMGSHGYGMIKR	27.46	83.48	-0.206	Universal stress protein family	Universal stress protein PHOS34 OS=Arabidopsis thaliana OX=3702 GN=PHOS34 PE=1 SV=1	Universal stress protein A-like protein [Actinidia chinensis var. chinensis]
VcUSP57	VaccDscaff23-augustus-gene-71.36	VaccDscaff23:7166323..7168909 (+)	MTKDRKIGVAMDFSAGSKMALKWAIDNLVKKDDTLFLIAVKPSEGNESRGSLWSNTGSPPVPLAELGDLDVEQKYGVKFGPDVLGMLKTFSRQKEVNVVGKVYWGDARDKLCEAVGGLKLDCLVMGSRGLGSIQRIVLGSVTNHVMTNATCPVTIVKDSNAHGF	31.34	102.91	-0.033	Universal stress protein family	U-box domain-containing protein 35 OS=Arabidopsis thaliana OX=3702 GN=PUB35 PE=2 SV=2	Serine/threonine-protein kinase, partial [Actinidia chinensis var. chinensis]
VcUSP58	VaccDscaff23-augustus-gene-71.33	VaccDscaff23:7125883..7127468 (+)	MEGERKVGVAVDFSPCSREALQWTVDNVVRQGDYLILVSVRPQGNYEQGEMQLWETTGSPLIPLTEFSDPNIMKKYGVHPDPESLDIVNTAARQKEIVVVMKIYWGDAREKICEAVDNIPLSCLVIGNRGLGKIKRVIMGSVSNYVVSNAVCPVTVVKHWAPTPSPDTPTPSPVLSPNYISFPPSSNLPSQPPSASGPVSTNPALEKICESTDYPAVCISTISPLLTGPTDLKTVVGIAIKAAADHTKLAVSLAAKLASTPSPLASTYGDCKDSYDDAVENFESAKDALATGDVGTMNSMLSAAITDFGDCDDGLLGQSSPLLDVDLALIHMTSNCLAIVSLIH	22.18	89.52	-0.204	Universal stress protein family	U-box domain-containing protein 35 OS=Arabidopsis thaliana OX=3702 GN=PUB35 PE=2 SV=2	Serine/threonine-protein kinase, partial [Actinidia chinensis var. chinensis]
VcUSP59	VaccDscaff23-augustus-gene-71.34	VaccDscaff23:7146689..7147786 (+)	MVRTVHVIQLVESVLHANDTLFLIAVKPSEGSESRSSLWSNTGSPPVPLAELGDLDVEQKYGVKFEPDVLGMLKTFSRQKEVNVVGKVYWGDARDKLCEAVGGLKLDCLVMGSRGLGTIQRIVLGSVTNHVMTNATCPVTIVKDSNAHGF	31.32	65.15	-0.941	Universal stress protein family	--	hypothetical protein C3L33_05212, partial [Rhododendron williamsianum]
VcUSP60	VaccDscaff41-snap-gene-201.37	VaccDscaff41:20127842..20134728 (-)	MASSEAKERKILVAVDEGEESSYALSWCLKNIVAENSKDTLILLYAKHIPPLYPAMVRPDLIASMEKYSSEVAESVMEKAKSLCKEVKVETKVERGDPRDVICQMTEKLGVDMVVMGTHGHGMIKRWGPFSFFNLFTNFLHCEI	42.39	69.6	-0.77	Universal stress protein family	--	hypothetical protein HYC85_025926 [Camellia sinensis]
VcUSP61	VaccDscaff12-snap-gene-321.52	VaccDscaff12:32087939..32097906 (-)	MSAYKSGRPCALVVSGNQKVPVKNCTTIFTFSRTAPYAVLILLISLSFCVRIRKICRRELGILEKREMEGDRRVGVAIDFSPCSRDALKWAVDNLVRAGDHLILITIRPEGNYEEGEMQLWQTTGSPLIPLREFSEPVMSKKYGVKPDPETLDIANTAAAQKEIVVLLKIYWGDAREKICEAIDNIPLSCLVIGNRGLGTLKRAIMGSVSNYVVNNASCPVTVVKHLDQ	50.82	73.61	-0.677	Universal stress protein family	--	hypothetical protein HYC85_025926 [Camellia sinensis]
VcUSP62	VaccDscaff41-augustus-gene-201.28	VaccDscaff41:20140656..20147648 (-)	MEGDRRVGVAIDFSPCSRDALKWAVDNLVRAGDHLILITIRPEGNYEEGEMQLWQTTGSPLIPLREFSEPIMSKKYGVKPDPETLDIANTAAAQKEIVVLLKIYWGDAREKICEAIDNIPLSCLVIGNRGLGTLKRAIMGSVSNYVVNNASCPVTVVKHLDQNKNHGAYQLSYPIHLLHHLPHDPQLCKCHLCSNQLNKTSPISIFLCFSNSTANPPKSLPFPHPASDTPSKSIFPVLPSLLEAVPQLSHTDDAPIKTICASTDYPEDCISSITPLLHGQTDLISVVGLAIQAATEHTQLAVAAATKIATSPGIPSDMASVIGDCKDSYNDALDNFQKATEALSSSDVGTMNSMLSAAITDFSDNDDSLAGKPYAPALLEFDAMLTKMTSNCLAIVSLI…	32.53	87.01	-0.337	Universal stress protein family	--	hypothetical protein C3L33_05212, partial [Rhododendron williamsianum]
VcUSP63	VaccDscaff41-snap-gene-201.33	VaccDscaff41:20103244..20108080 (-)	MEGERKVGVAVDFSPCSREALQWTVDNVVRQGDYLILVSVRPPGNYEQGEMQLWETTGSPLIPLTEFSDPNIMKKYGVQPDPESLDIVNTAARQKEIVVVMKIYWGDAREKICEAVDNIPLSCLVIGNRGLGKIKRVIMGSVSNYVVSNAVCPVTVVKHWVKE	36.8	86.65	-0.557	Universal stress protein family	--	hypothetical protein C3L33_05212, partial [Rhododendron williamsianum]
VcUSP64	VaccDscaff12-augustus-gene-320.36	VaccDscaff12:32051151..32058175 (-)	MEGERKVGVAVDFSPCSREALQWTVDNVVRQGDYLILVSVRPAGNYEQGEMQLWETTGSPLIPLTEFSDPNIMKKYGVHPDPESLDIVNTAARQKEIVVVMKIYWGDAREKICEAVDNIPLSCLVIGNRGLGKIKRVIMGSVSNYVVSNAVCPVTVVKHWASPSPELSTPEAPTPSPDTPTPSPVLSPNYISFPPSSNLPSQPPSVSGPASSNPALEKICESTDYPAVCISTISPLLTGPSDLKTVVGIAIKVAAEHTKLAVSLATKLAAMPSPLASTYGDCKDSYDDAVENFESAKDALATGDVGTMNSMLSAAITDFGDCDDGLLGQSSPLLDVDLALIHMTSNCLAIVSLIH	35.21	86.46	-0.322	Universal stress protein family	--	hypothetical protein C3L33_05212, partial [Rhododendron williamsianum]
VcUSP65	VaccDscaff7-snap-gene-154.21	VaccDscaff7:15434419..15437768 (+)	MEGDRRVGVAIDFSPCSRDALKWAVDNLVRAGDHLILITIRPEGNYEEGEMQLWQTTGSPLIPLREFSEPVMSKKYGVKPDPQTLDIANTAAAQKEIVVLLKIYWGDAREKICEAIDNIPLSCIVIGNRGLGTLKRAIMGSVSNYVVNNASCPVTVVKHLDQ	54.28	96.03	-0.24	Universal stress protein family	--	PREDICTED: U-box domain-containing protein 52-like [Solanum tuberosum]
VcUSP66	VaccDscaff30-augustus-gene-184.25	VaccDscaff30:18460374..18467930 (+)	MEGDRRVGVAIDFSPCSRDALKWAVDNLVRAGDHLILITIRPEGNYEEGEMQLWQTTGSPLIPLREFSEPVMSKKYGVKPDPQTLDIANTAAAQKEVVVLLKIYWGDAREKICEAIDNIPLSCIVIGNRGLGTLKRAIMGSVSNYVVNNASCPVTVVKHLDQNKNHGAYQLSYPIHLLHHHPHDPQLCKCHLCSNQLNKTSPISIFLCFSNSTANPASDPPKSLPFPHPASDTPSKSIFPVLPSLLEAVPQLSHTDDAPIKTICASTDYPEDCISSITPLLHGQTDLISVVGLAIQAATEHTQLAVAAATKIATSPGIPSDMASVIGDCKDSYNDALDNFQKATEALSSSDVGTMNSMLSAAITDFSDNDDSLAGKPYAPALLEFDAMLTKMTSNCLAI…	60.68	106.75	-0.129	Universal stress protein family	--	uncharacterized protein LOC114257946 [Camellia sinensis]
VcUSP67	VaccDscaff17-augustus-gene-287.33	VaccDscaff17:28727163..28729933 (-)	MWNQRGNANGNVNDNGGDQRRDEAVLVAIDKDKSSQFALKWAIDNLLSKGQTVTLIHVKQRPASIPTPLGSQVAVSDVNDGVAKAFKVQVDNQAKELFLPFRAFCTRKDEQISIDVLGKRSIYVKEYESHRSTISLSKQPQAPNPEVADLQQKIDDQAKALTKYSQSLTIVQGLLQVLAAKAGIDPAEVQELIDRNNIVEGTSGEENDVANTSREEDDAAGTSE	53.9	87.25	-0.336	Universal stress protein family	--	hypothetical protein C3L33_21708, partial [Rhododendron williamsianum]
VcUSP68	VaccDscaff37-augustus-gene-110.26	VaccDscaff37:11084541..11086421 (-)	MWNQRGNANGNVNDNSRDQMRDEAVLVAIDKDKSSQYALKWAIDNLLSKGQTVTLLHVKQRPASIPTQLGSQVALSDVNDGIVKAFKAQVDNQAKELFLPFRAFCTRKNIKCKEIILEDPDVSKVICDFVKANLIEALVVGACSRNGFVKRFKATDIPTNLSKGAPEFCSVYVISKGKIQSVRSTTAPRQNPSPRPLPILGTTLLLSLPLCLLIFSLSLSLSLSLSLSLSMPTK	58.19	75.51	-0.368	Universal stress protein family	--	hypothetical protein C3L33_11341, partial [Rhododendron williamsianum]
VcUSP69	VaccDscaff19-augustus-gene-101.37	VaccDscaff19:10131654..10132919 (+)	MWNQRGNANGNHRGNANGNGNDNSGDQRRDEAVLVAIDKDKSSQYALKWAIDNLLSKGQTVTLIHVKQRPASIPTPKAMRSAPKQCAGSRIRYGDMHIH	47.99	86.19	-0.337	Universal stress protein family	--	hypothetical protein C3L33_16958, partial [Rhododendron williamsianum]
VcUSP70	VaccDscaff42-augustus-gene-144.23	VaccDscaff42:14477212..14478469 (-)	MWNQRGNANGNHRGNANGNGNDNSGDQRRDEAVLVAIDKDKSSQYALKWAIDNLLSKGQTVTLIHVKQRPASIPTPMGSHVAVSDVNDGVAKAFKAQVDNQAKELFLPFRAFCTRKDDEVEAEMRRLKQELKQTMEMYSIACKEALTAKQKVLTQARAQADNGPVFKCFLDHTPVAVKVLRPDAAQGRSQFQQEDEVEAEMRRLKQDLKQTMEMYNTACKEALTAKQKAMELHRWKIEEQHRLEQTQLAEEAALAMAEKEKAKTKAAIEAAEAAQRIAEPEAQKRMNAEMKALKESEEKKKVLDVLAHSDLRYCKYTIEEIESATENFSNSRKIGGGDGFLIDQEKERNRPVAVEKSDGLWLEKEDWCFVTFAEG	43.26	75.17	-0.6	Universal stress protein family	--	hypothetical protein C3L33_22396, partial [Rhododendron williamsianum]
VcUSP71	VaccDscaff1-processed-gene-142.2	VaccDscaff1:14186424..14186879 (-)	MWNQRGNANGNVNDNGGDQRRDEAVLVAIDKDKSSQFALKWAIDNQLSKGQTVTLIHVKQRPASIPTPYSFGGIAVCYFALWFSFISYVGSQVAVSDVNDGVAKAFKAQVDNQAKELFLPFRAFCTRKDVSVAKGVSGIAFAKRSLRVVVVNVTYPLSEEQISIDVLGKRSVYVKEYGSHRSTISLSKQPQAPNPEVADLQQKIDDQAKTLTKYSRTLTIVQGLLQMLAAKAGIDPAEVQELIDRNNIVEGTSGEENDVANTSREEDDAAGTSE	28.72	84.64	-0.11	Universal stress protein family	--	hypothetical protein C3L33_12568, partial [Rhododendron williamsianum]
VcUSP72	VaccDscaff10-augustus-gene-268.29	VaccDscaff10:26844071..26845665 (+)	MWNQRGNANGNVNDNGGDQRRDEAVLVAIDKDKSSQFALKWAIDNLLSKGQTVTLIHVKQRPASIPTPLGSQVTVSDVNDGVAKAFKAQVDNQAKELFLPFRAFCTRKDIKCKEIILEDPDVSKVICDFVKANLIEALVVGASSRNGFVKFKATDIPTNLSKGAPEFCSVYVISPGKIQSVRYATSVDARPMQTNSARGLLPQLLGYF	25.78	83.48	-0.205	Universal stress protein family	--	hypothetical protein C3L33_12568, partial [Rhododendron williamsianum]

## Sheet: Table S2
Table S2 Function of VcUSP promoter cis-acting elements.
Site name	Function	VcUSPs
TGA-element	Auxin-responseive element	VcUSP4	VcUSP5	VcUSP6	VcUSP8	VcUSP12	VcUSP13	VcUSP14	VcUSP15	VcUSP16	VcUSP17	VcUSP24	VcUSP28	VcUSP30	VcUSP32	VcUSP34	VcUSP35	VcUSP36	VcUSP38	VcUSP40	VcUSP44	VcUSP45	VcUSP46	VcUSP47	VcUSP48	VcUSP49	VcUSP50	VcUSP51	VcUSP52	VcUSP54	VcUSP55	VcUSP56	VcUSP57	VcUSP59	VcUSP60	VcUSP65	VcUSP66	VcUSP67	VcUSP67	VcUSP69	VcUSP70
LTR	cis-acting element involved in low-temperature responsiveness	VcUSP1	VcUSP2	VcUSP3	VcUSP4	VcUSP6	VcUSP7	VcUSP8	VcUSP10	VcUSP11	VcUSP12	VcUSP15	VcUSP17	VcUSP22	VcUSP23	VcUSP24	VcUSP25	VcUSP26	VcUSP27	VcUSP34	VcUSP35	VcUSP36	VcUSP38	VcUSP39	VcUSP40	VcUSP41	VcUSP42	VcUSP44	VcUSP46	VcUSP47	VcUSP48	VcUSP49	VcUSP50	VcUSP51	VcUSP54	VcUSP54	VcUSP55	VcUSP59	VcUSP60	VcUSP65	VcUSP67	VcUSP68	VcUSP69	VcUSP70	VcUSP71	VcUSP72
TCA-element	cis-acting element involved in salicylic acid responsiveness	VcUSP3	VcUSP5	VcUSP7	VcUSP8	VcUSP10	VcUSP11	VcUSP12	VcUSP13	VcUSP15	VcUSP17	VcUSP18	VcUSP19	VcUSP20	VcUSP26	VcUSP27	VcUSP29	VcUSP30	VcUSP31	VcUSP38	VcUSP40	VcUSP42	VcUSP44	VcUSP48	VcUSP49	VcUSP50	VcUSP51	VcUSP54	VcUSP54	VcUSP55	VcUSP57	VcUSP58	VcUSP59	VcUSP60	VcUSP61	VcUSP62	VcUSP63	VcUSP64	VcUSP67	VcUSP68	VcUSP69	VcUSP70
ABRE	cis-acting element involved in the abscisic acid responsiveness	VcUSP4	VcUSP5	VcUSP6	VcUSP8	VcUSP12	VcUSP13	VcUSP14	VcUSP15	VcUSP16	VcUSP17	VcUSP24	VcUSP28	VcUSP30	VcUSP32	VcUSP34	VcUSP35	VcUSP36	VcUSP38	VcUSP40	VcUSP44	VcUSP45	VcUSP46	VcUSP47	VcUSP48	VcUSP49	VcUSP50	VcUSP51	VcUSP52	VcUSP54	VcUSP55	VcUSP56	VcUSP57	VcUSP59	VcUSP60	VcUSP65	VcUSP66	VcUSP67	VcUSP67	VcUSP69	VcUSP70	VcUSP50	VcUSP10	VcUSP12	VcUSP11	VcUSP13	VcUSP14	VcUSP16	VcUSP21
ARE	cis-acting regulatory element essential for the anaerobic induction	VcUSP1	VcUSP2	VcUSP3	VcUSP4	VcUSP7	VcUSP8	VcUSP9	VcUSP10	VcUSP11	VcUSP12	VcUSP14	VcUSP15	VcUSP16	VcUSP17	VcUSP18	VcUSP19	VcUSP20	VcUSP21	VcUSP22	VcUSP23	VcUSP24	VcUSP25	VcUSP26	VcUSP27	VcUSP29	VcUSP30	VcUSP31	VcUSP33	VcUSP34	VcUSP35	VcUSP36	VcUSP37	VcUSP38	VcUSP39	VcUSP40	VcUSP41	VcUSP42	VcUSP43	VcUSP44	VcUSP45	VcUSP46	VcUSP47	VcUSP48	VcUSP49	VcUSP50	VcUSP51	VcUSP52	VcUSP54
O2-site	cis-acting regulatory element involved in zein metabolism regulation	VcUSP1	VcUSP2	VcUSP3	VcUSP4	VcUSP5	VcUSP6	VcUSP7	VcUSP24	VcUSP26	VcUSP33	VcUSP35	VcUSP36	VcUSP38	VcUSP41	VcUSP43	VcUSP44	VcUSP46	VcUSP47	VcUSP49	VcUSP52	VcUSP55	VcUSP56	VcUSP70
GC-motif	enhancer-like element involved in anoxic specific inducibility	VcUSP10	VcUSP15	VcUSP17	VcUSP22	VcUSP26	VcUSP27	VcUSP28	VcUSP47	VcUSP48	VcUSP54	VcUSP55	VcUSP56	VcUSP57	VcUSP58	VcUSP62	VcUSP63	VcUSP64	VcUSP65	VcUSP66	VcUSP67
GARE-motif /P-box	Gibberellin-responsive element	VcUSP1	VcUSP3	VcUSP4	VcUSP6	VcUSP8	VcUSP9	VcUSP13	VcUSP14	VcUSP15	VcUSP17	VcUSP19	VcUSP25	VcUSP26	VcUSP29	VcUSP30	VcUSP31	VcUSP33	VcUSP37	VcUSP41	VcUSP42	VcUSP43	VcUSP44	VcUSP45	VcUSP46	VcUSP47	VcUSP48	VcUSP49	VcUSP50	VcUSP51	VcUSP52	VcUSP54	VcUSP54	VcUSP55	VcUSP56	VcUSP57	VcUSP58	VcUSP59	VcUSP60	VcUSP61	VcUSP62	VcUSP63	VcUSP64	VcUSP66	VcUSP70	VcUSP71	VcUSP72
MBS	MYB binding site involved in drought-inducibility	VcUSP3	VcUSP5	VcUSP10	VcUSP11	VcUSP14	VcUSP15	VcUSP16	VcUSP17	VcUSP18	VcUSP19	VcUSP20	VcUSP21	VcUSP22	VcUSP23	VcUSP26	VcUSP27	VcUSP28	VcUSP33	VcUSP35	VcUSP36	VcUSP37	VcUSP39	VcUSP41	VcUSP44	VcUSP45	VcUSP50	VcUSP51	VcUSP52	VcUSP54	VcUSP55	VcUSP56	VcUSP57	VcUSP58	VcUSP61	VcUSP62	VcUSP63	VcUSP64	VcUSP68	VcUSP70	VcUSP71	VcUSP72
AuxRR-core	cis-acting regulatory element involved in auxin responsiveness	VcUSP5	VcUSP6	VcUSP7	VcUSP26	VcUSP45	VcUSP46	VcUSP47	VcUSP52	VcUSP56	VcUSP65
CGTCA-motif/TGACG-motif	cis-acting regulatory element involved in the MeJA-responsiveness	VcUSP1	VcUSP2	VcUSP3	VcUSP4	VcUSP5	VcUSP7	VcUSP8	VcUSP9	VcUSP10	VcUSP12	VcUSP13	VcUSP14	VcUSP15	VcUSP16	VcUSP17	VcUSP20	VcUSP21	VcUSP22	VcUSP23	VcUSP24	VcUSP26	VcUSP27	VcUSP28	VcUSP29	VcUSP30	VcUSP31	VcUSP32	VcUSP33	VcUSP34	VcUSP35	VcUSP36	VcUSP37	VcUSP39	VcUSP41	VcUSP43	VcUSP45	VcUSP46	VcUSP47	VcUSP48	VcUSP49	VcUSP54	VcUSP57	VcUSP58	VcUSP59	VcUSP60	VcUSP61	VcUSP62	VcUSP63
CAT-box	cis-acting regulatory element related to meristem expression	VcUSP5	VcUSP11	VcUSP12	VcUSP20	VcUSP21	VcUSP22	VcUSP23	VcUSP24	VcUSP25	VcUSP30	VcUSP32	VcUSP34	VcUSP35	VcUSP36	VcUSP38	VcUSP39	VcUSP40	VcUSP42	VcUSP43	VcUSP54	VcUSP58	VcUSP61	VcUSP62	VcUSP63	VcUSP64	VcUSP65	VcUSP67	VcUSP68	VcUSP70
MER	MYB binding site involved in light responsiveness	VcUSP1	VcUSP2	VcUSP14	VcUSP18	VcUSP19	VcUSP22	VcUSP32	VcUSP33	VcUSP42	VcUSP54	VcUSP65	VcUSP66	VcUSP67	VcUSP70
WUN-motif	Wound-responsive element	VcUSP8	VcUSP9	VcUSP15	VcUSP17	VcUSP32	VcUSP34	VcUSP69	VcUSP70
TATC-box	cis-acting element involved in gibberellin-responsiveness	VcUSP25	VcUSP27	VcUSP35	VcUSP36	VcUSP38	VcUSP40	VcUSP54	VcUSP66	VcUSP72
CCAAT-box	MYBHv1 binding site	VcUSP5	VcUSP6	VcUSP8	VcUSP9	VcUSP11	VcUSP26	VcUSP27	VcUSP28	VcUSP29	VcUSP30	VcUSP35	VcUSP36	VcUSP41	VcUSP44	VcUSP46	VcUSP47	VcUSP48	VcUSP58	VcUSP61	VcUSP62	VcUSP63	VcUSP64
circadian	cis-acting regulatory element involved in circadian control	VcUSP1	VcUSP10	VcUSP38	VcUSP39	VcUSP40	VcUSP44	VcUSP48	VcUSP49
HD-Zip 1	element involved in differentiation of the palisade mesophyll cells	VcUSP13	VcUSP23	VcUSP37	VcUSP38	VcUSP39	VcUSP40	VcUSP57	VcUSP61	VcUSP65	VcUSP66	VcUSP68
HD-Zip 3	Protein binding site	VcUSP1	VcUSP2	VcUSP3	VcUSP4	VcUSP20	VcUSP24	VcUSP38	VcUSP40
TC-rich repeats	cis-acting element involved in defense and stress responsiveness	VcUSP1	VcUSP2	VcUSP4	VcUSP8	VcUSP11	VcUSP12	VcUSP16	VcUSP18	VcUSP19	VcUSP21	VcUSP22	VcUSP23	VcUSP26	VcUSP27	VcUSP28	VcUSP29	VcUSP31	VcUSP37	VcUSP44	VcUSP45	VcUSP48	VcUSP50	VcUSP51	VcUSP71
GCN4_motif	cis-regulatory element involved in endosperm expression	VcUSP16	VcUSP20	VcUSP27	VcUSP57	VcUSP66
AT-rich element	Binding site of AT-rich DNA binding protein (ATBP-1)	VcUSP41	VcUSP45	VcUSP58	VcUSP61	VcUSP62	VcUSP63	VcUSP64	VcUSP66	VcUSP68	VcUSP70
TGA-box	part of an auxin-responsive element	VcUSP41	VcUSP66
MSA-like	cis-acting element involved in cell cycle regulation	VcUSP6	VcUSP24	VcUSP28	VcUSP58	VcUSP61	VcUSP62	VcUSP63	VcUSP64
AT-rich sequence	element for maximal elicitor-mediated activation (2copies)	VcUSP11	VcUSP12	VcUSP13	VcUSP48
MBSI	MYB binding site involved in flavonoid biosynthetic genes regulation	VcUSP13	VcUSP37
NON-box	cis-regulatory element related to meristem specific activation	VcUSP14
motifⅠ	cis-regulatory element root specific	VcUSP22	VcUSP49	VcUSP71
RY-element	cis-regulatory element involved in seed-specific regulation	VcUSP68
[truncated: 20 more columns]

## Sheet: Table S3
Table S3 The differential expressed VcUSP genes under UV-B radiation from transcriptome sequencing (RNA-Seq)
Regulated	Gene name	Gene ID	0 h rep 1 FPKM	0 h rep 2 FPKM	0 h rep 3 FPKM	1 h rep 1 FPKM	1 h rep 2 FPKM	1 h rep 3 FPKM	3 h rep 1 FPKM	3 h rep 2 FPKM	3 h rep 3 FPKM	6 h rep 1 FPKM	6 h rep 2 FPKM	6 h rep 3 FPKM	12 h rep 1 FPKM	12 h rep 2 FPKM	12 h rep 3 FPKM	24 h rep 1 FPKM	24 h rep 2 FPKM	24 h rep 3 FPKM	0h_vs_1h_DESeq2_FDR	0h_vs_1h_DESeq2_log2FC	0h_vs_1h_DESeq2_(FDR_0.01_FC_2)_regulated	0h_vs_3h_DESeq2_FDR	0h_vs_3h_DESeq2_log2FC	0h_vs_3h_DESeq2_(FDR_0.01_FC_2)_regulated	0h_vs_6h_DESeq2_FDR	0h_vs_6h_DESeq2_log2FC	0h_vs_6h_DESeq2_(FDR_0.01_FC_2)_regulated	0h_vs_12h_DESeq2_FDR	0h_vs_12h_DESeq2_log2FC	0h_vs_12h_DESeq2_(FDR_0.01_FC_2)_regulated	0h_vs_24h_DESeq2_FDR	0h_vs_24h_DESeq2_log2FC	0h_vs_24h_DESeq2_(FDR_0.01_FC_2)_regulated	COG_class_annotation	Pfam_annotation	Swiss_Prot_annotation	eggNOG_class_annotation	NR_annotation
Up-regulated	VcUSP26	VaccDscaff32-augustus-gene-297.41	4.67089	5.19133	4.67609	4.30586	5.55747	5.12384	8.55743	6.96977	6.57113	11.3936	11.6278	12.1917	14.8857	16.5727	15.262	18.902	17.2881	18.4733	0.644829	0.154406	normal	4.98612e-05	0.773653	normal	2.76447e-21	1.3875	up	9.69559e-37	1.82572	up	2.49171e-59	2.04763	up	Signal transduction mechanisms	Universal stress protein family	Universal stress protein A-like protein OS=Arabidopsis thaliana OX=3702 GN=At3g01520 PE=1 SV=2	Function unknown	hypothetical protein C3L33_01606, partial [Rhododendron williamsianum]
	VcUSP32	VaccDscaff47-snap-gene-186.39	23.4475	24.0968	21.2967	24.0641	24.8338	25.076	26.714	29.0363	24.0481	43.1966	42.9292	41.7048	31.3497	38.3909	31.1727	41.6231	40.676	40.8676	0.0318231	0.225796	normal	0.000240021	0.396015	normal	3.64579e-37	1.02149	up	9.41308e-09	0.710686	normal	2.36733e-40	0.990309	normal	Signal transduction mechanisms	Universal stress protein family	Universal stress protein PHOS34 OS=Arabidopsis thaliana OX=3702 GN=PHOS34 PE=1 SV=1	Signal transduction mechanisms	hypothetical protein HYC85_032250 [Camellia sinensis]
	VcUSP34	VaccDscaff46-augustus-gene-198.27	13.7185	13.8167	11.3172	15.7439	14.7635	18.1347	22.8011	22.7935	18.8584	33.2527	30.7007	34.5807	25.6247	29.5996	24.5538	31.1448	32.6149	29.306	0.00189206	0.439498	normal	5.19361e-13	0.907717	normal	1.78795e-46	1.46392	up	4.14825e-20	1.19199	up	2.59484e-42	1.40686	up	Signal transduction mechanisms	Universal stress protein family	Universal stress protein PHOS34 OS=Arabidopsis thaliana OX=3702 GN=PHOS34 PE=1 SV=1	Signal transduction mechanisms	hypothetical protein HYC85_032250 [Camellia sinensis]
	VcUSP41	VaccDscaff46-augustus-gene-204.29	2.5253	3.20912	2.05695	5.40121	5.0329	5.33953	11.4051	10.8184	14.775	17.725	15.7798	16.6402	14.1242	16.6769	17.5537	14.8114	20.7406	17.1857	6.68725e-06	1.04973	up	3.06194e-30	2.36543	up	1.09479e-58	2.75598	up	1.18959e-47	2.73887	up	9.7768e-46	2.85545	up	Signal transduction mechanisms	Universal stress protein family	--	Signal transduction mechanisms	hypothetical protein C3L33_03978, partial [Rhododendron williamsianum]
	VcUSP43	VaccDscaff27-snap-gene-133.25	34.4393	32.1028	27.1992	35.871	37.5233	36.0293	57.7311	60.3859	57.7528	47.9354	51.3059	51.1814	40.8754	47.5192	39.2689	44.1473	41.9062	44.3306	0.00329876	0.3424	normal	4.84116e-31	1.08703	up	3.98106e-14	0.810446	normal	4.22197e-06	0.605162	normal	3.69684e-10	0.627392	normal	Signal transduction mechanisms	Universal stress protein family	--	Signal transduction mechanisms	universal stress protein A-like protein [Ziziphus jujuba]
	VcUSP46	VaccDscaff45-snap-gene-135.49	0.425393	0.368239	0.586257	1.2232	1.43829	1.07664	1.97076	1.76422	1.89133	0.982501	0.919007	1.13386	0.707249	0.675214	0.780843	0.682025	0.950337	0.68383	2.12512e-05	1.31894	up	3.1836e-14	2.11047	up	0.000719878	1.17864	up	0.0650534	0.75716	normal	0.0388619	0.839837	normal	--	Universal stress protein family	--	Signal transduction mechanisms	Universal stress protein A-like protein [Actinidia chinensis var. chinensis]
	VcUSP47	VaccDscaff17-augustus-gene-170.28	13.8578	12.5822	12.6791	26.9962	26.3943	26.8527	33.7395	32.7221	28.8129	21.5565	18.8225	18.1702	12.0841	13.0168	11.494	12.9287	14.7373	13.2008	1.9826e-28	1.13995	up	4.7929e-38	1.45723	up	1.27155e-08	0.706404	normal	0.737385	0.066	normal	0.15944	0.213715	normal	Signal transduction mechanisms	Universal stress protein family	Universal stress protein PHOS32 OS=Arabidopsis thaliana OX=3702 GN=PHOS32 PE=1 SV=1	Signal transduction mechanisms	Universal stress protein A-like protein [Actinidia chinensis var. chinensis]
	VcUSP48	VaccDscaff17-augustus-gene-170.30	33.9678	36.2452	33.8504	47.8078	47.096	51.3058	73.4886	73.081	57.4762	41.9271	49.2556	43.4797	38.4184	41.966	38.7922	39.8158	34.0592	36.6621	4.24271e-13	0.609403	normal	9.38346e-25	1.14881	up	9.06935e-06	0.503696	normal	0.000661674	0.35671	normal	0.0176276	0.240783	normal	Signal transduction mechanisms	Universal stress protein family	Universal stress protein PHOS32 OS=Arabidopsis thaliana OX=3702 GN=PHOS32 PE=1 SV=1	Signal transduction mechanisms	Universal stress protein A-like protein [Actinidia chinensis var. chinensis]
	VcUSP50	VaccDscaff17-processed-gene-170.18	17.6461	14.955	13.4087	19.1345	18.9539	22.5869	45.3576	46.8755	45.6096	28.9584	29.065	31.1838	23.3845	25.1144	22.728	22.7692	21.9485	21.982	0.00019017	0.510944	normal	4.56114e-69	1.75637	up	2.8776e-21	1.07864	up	6.34312e-10	0.787012	normal	1.7857e-09	0.685163	normal	Signal transduction mechanisms	Universal stress protein family	--	Signal transduction mechanisms	Universal stress protein A-like protein [Actinidia chinensis var. chinensis]
	VcUSP51	VaccDscaff27-snap-gene-133.30	0.238314	0.103511	0.251769	0.26796	0.433951	0.200572	0.494834	0.477766	0.497367	0.344453	0.371227	0.439519	0.288856	0.271179	0.40397	0.38135	0.51875	0.325424	0.406369	0.482667	normal	0.00165632	1.33951	up	0.0504182	0.94207	normal	0.162202	0.754277	normal	0.0286214	1.07862	normal	Signal transduction mechanisms	Universal stress protein family	--	Signal transduction mechanisms	Universal stress protein A-like protein [Actinidia chinensis var. chinensis]
	VcUSP52	VaccDscaff34-snap-gene-182.37	6.11931	5.87265	5.82352	8.58853	9.49125	9.39391	17.8914	16.2978	13.3548	13.7597	12.9252	12.6743	13.5581	15.1499	12.2326	13.3015	13.5784	15.2791	1.81821e-08	0.727888	normal	1.72819e-30	1.5821	up	1.78044e-30	1.26419	up	3.13724e-22	1.35038	up	9.21091e-33	1.3873	up	Signal transduction mechanisms	Universal stress protein family	Universal stress protein PHOS32 OS=Arabidopsis thaliana OX=3702 GN=PHOS32 PE=1 SV=1	Signal transduction mechanisms	Rossmann-like alpha/beta/alpha sandwich fold [Cynara cardunculus var. scolymus]
	VcUSP55	VaccDscaff45-snap-gene-135.50	2.50853	2.78947	3.00944	4.77949	5.348	3.10875	9.65302	6.13568	5.79545	5.09453	4.62056	4.69428	3.94739	5.86348	3.44203	6.14971	5.83024	4.19684	0.00313391	0.730961	normal	4.20298e-12	1.52039	up	3.19597e-08	0.911541	normal	0.0013037	0.817223	normal	5.25932e-08	1.09351	up	Signal transduction mechanisms	Universal stress protein family	Universal stress protein PHOS32 OS=Arabidopsis thaliana OX=3702 GN=PHOS32 PE=1 SV=1	Signal transduction mechanisms	Rossmann-like alpha/beta/alpha sandwich fold [Cynara cardunculus var. scolymus]
	VcUSP56	VaccDscaff17-processed-gene-170.19	3.79175	3.87552	3.79582	4.63349	4.60574	5.18864	9.37096	9.5122	9.89145	7.47494	7.54494	8.01091	8.13036	9.4097	9.36105	9.94797	9.60354	9.73007	0.00222292	0.445647	normal	1.89434e-49	1.5031	up	1.43458e-22	1.1287	up	1.76965e-29	1.38101	up	1.69021e-50	1.49981	up	Signal transduction mechanisms	Universal stress protein family	Universal stress protein PHOS34 OS=Arabidopsis thaliana OX=3702 GN=PHOS34 PE=1 SV=1	Signal transduction mechanisms	Universal stress protein A-like protein [Actinidia chinensis var. chinensis]
Down-regulated	VcUSP1	VaccDscaff9-augustus-gene-4.24	40.2653	42.9514	34.8369	40.2342	34.0447	38.2376	33.5397	33.5992	33.4699	29.3454	25.6196	27.1844	20.2632	20.1845	19.4131	16.1551	18.0763	17.0451	0.767051	0.0563393	normal	0.724962	-0.0445561	normal	0.000159897	-0.387825	normal	3.43614e-14	-0.811273	normal	7.47506e-24	-1.04335	down	Signal transduction mechanisms	Universal stress protein family	--	Function unknown	Universal stress protein [Actinidia chinensis var. chinensis]
	VcUSP3	VaccDscaff4-augustus-gene-31.64	40.2376	45.065	41.9643	44.0087	41.4601	38.8291	34.2668	33.8051	34.6407	31.7108	28.4956	26.0966	25.3209	23.6668	23.6831	17.2526	17.4888	17.5758	0.547562	0.0900577	normal	0.222489	-0.123345	normal	6.9008e-05	-0.424224	normal	3.63178e-10	-0.641788	normal	3.68867e-34	-1.12359	down	Signal transduction mechanisms	Universal stress protein family	--	Function unknown	Universal stress protein [Actinidia chinensis var. chinensis]
	VcUSP5	VaccDscaff5-augustus-gene-16.25	26.2455	31.3169	25.8424	23.9453	30.6795	24.3853	21.5587	18.2187	17.9281	20.4604	19.9808	16.6104	11.5366	10.6037	9.68819	9.95644	13.2024	9.19077	0.87425	0.0457292	normal	0.0150234	-0.341678	normal	0.00389959	-0.407627	normal	5.28557e-18	-1.21241	down	1.95492e-13	-1.19961	down	Signal transduction mechanisms	Universal stress protein family	--	Function unknown	hypothetical protein C3L33_12974, partial [Rhododendron williamsianum]
	VcUSP6	VaccDscaff8-snap-gene-397.80	8.66294	6.67591	7.21738	6.4736	8.69673	6.1703	4.58121	5.69883	4.16803	4.33685	4.48824	3.85287	1.38897	3.41262	2.61943	3.37877	2.98617	2.85605	0.925464	0.0398442	normal	0.0386995	-0.448472	normal	0.000478033	-0.681135	normal	4.9219e-06	-1.38262	down	8.66064e-09	-1.11567	down	Signal transduction mechanisms	Universal stress protein family	--	Function unknown	hypothetical protein C3L33_12974, partial [Rhododendron williamsianum]
	VcUSP7	VaccDscaff1-snap-gene-18.55	5.07335	3.84583	5.17987	4.54966	4.27798	4.0988	2.91914	4.38097	3.35993	2.73188	2.60137	3.22398	1.40954	2.07167	1.57453	2.09968	1.71578	1.78802	0.999184	0.000553162	normal	0.486145	-0.213802	normal	0.0253267	-0.570184	normal	4.22442e-06	-1.27464	down	4.25489e-06	-1.14392	down	Signal transduction mechanisms	Universal stress protein family	Putative pectinesterase/pectinesterase inhibitor 26 OS=Arabidopsis thaliana OX=3702 GN=PME26 PE=2 SV=1	Function unknown	hypothetical protein C3L33_12974, partial [Rhododendron williamsianum]
	VcUSP13	VaccDscaff8-snap-gene-25.29	3.48371	2.16665	3.60859	2.95861	4.17481	3.98831	2.69769	2.67536	2.62545	1.76175	2.49354	3.03086	1.88065	2.14813	1.51004	1.43541	0.858464	1.1692	0.390557	0.341801	normal	0.95258	-0.0254007	normal	0.65829	-0.196998	normal	0.132079	-0.551416	normal	0.000696461	-1.20113	down	Signal transduction mechanisms	Universal stress protein family	Universal stress protein PHOS34 OS=Arabidopsis thaliana OX=3702 GN=PHOS34 PE=1 SV=1	Function unknown	hypothetical protein F0562_008887 [Nyssa sinensis]
	VcUSP22	VaccDscaff8-augustus-gene-404.35	1.7693	3.59296	2.13436	1.47721	1.19623	1.85854	1.6516	2.16346	0.951303	0.710642	0.957734	0.615794	0.571132	0.615609	0.357076	0.232396	0.117041	0.324558	0.349287	-0.459578	normal	0.430094	-0.406114	normal	0.00173862	-1.37131	down	8.65502e-05	-1.85393	down	1.88355e-08	-2.80688	down	Signal transduction mechanisms	Universal stress protein family	--	Signal transduction mechanisms	universal stress protein A-like protein [Camellia sinensis]
	VcUSP68	VaccDscaff37-augustus-gene-110.26	4.37005	4.96797	4.70497	3.37136	3.65862	3.50095	3.58509	5.34342	3.4647	1.40398	2.9837	1.31759	1.57407	1.08249	1.15434	0.894068	1.27296	0.947477	0.272088	-0.274768	normal	0.992348	0.00342751	normal	0.0013879	-1.07765	down	2.36683e-11	-1.65326	down	3.50491e-16	-1.96593	down	--	Universal stress protein family	--	Function unknown	hypothetical protein C3L33_11341, partial [Rhododendron williamsianum]

## Sheet: Table S4
Table S4 The differential expressed VcUSP genes under ABA treatment from transcriptome sequencing (RNA-Seq)
Regulated	Gene name	Gene ID	0 h rep 1 FPKM	0 h rep 2 FPKM	0 h rep 3 FPKM	6 h rep 1 FPKM	6 h rep 2 FPKM	6 h rep 3 FPKM	12 h rep 1 FPKM	12 h rep 2 FPKM	12 h rep 3 FPKM	0h_vs_6h_DESeq2_FDR	0h_vs_6h_DESeq2_log2FC	0h_vs_6h_DESeq2_(FDR_0.01_FC_2)_regulated	0h_vs_12h_DESeq2_FDR	0h_vs_12h_DESeq2_log2FC	0h_vs_12h_DESeq2_(FDR_0.01_FC_2)_regulated	COG_class_annotation	Pfam_annotation	Swiss_Prot_annotation	eggNOG_class_annotation	NR_annotation
Up-regulated	VcUSP11	VaccDscaff14-augustus-gene-373.27	7.33645	5.45872	5.48126	11.1145	13.1842	13.0337	11.6306	12.6717	12.9152	1.05907e-06	1.10122	up	9.15417e-06	1.01227	up	Signal transduction mechanisms	Universal stress protein family	--	Function unknown	universal stress protein PHOS32 [Camellia sinensis]
	VcUSP15	VaccDscaff1-augustus-gene-355.19	7.36199	6.00683	7.97358	20.7562	22.268	20.2195	15.9362	21.3937	18.1693	6.66894e-31	1.63962	up	4.48638e-15	1.36659	up	Signal transduction mechanisms	Universal stress protein family	Universal stress protein PHOS32 OS=Arabidopsis thaliana OX=3702 GN=PHOS32 PE=1 SV=1	Function unknown	hypothetical protein HYC85_012096 [Camellia sinensis]
	VcUSP16	VaccDscaff5-augustus-gene-335.18	5.73764	5.05488	5.64678	17.5333	14.7559	14.8813	13.9735	16.6083	13.5602	9.47808e-25	1.59422	up	1.84298e-17	1.41306	up	Signal transduction mechanisms	Universal stress protein family	Universal stress protein PHOS32 OS=Arabidopsis thaliana OX=3702 GN=PHOS32 PE=1 SV=1	Function unknown	hypothetical protein HYC85_012096 [Camellia sinensis]
	VcUSP39	VaccDscaff51-augustus-gene-12.23	18.1394	18.0881	18.2718	40.9349	39.564	40.685	19.1125	21.7693	19.1731	1.99026e-28	1.22628	up	0.574267	0.12985	normal	Signal transduction mechanisms	Universal stress protein family	Universal stress protein PHOS34 OS=Arabidopsis thaliana OX=3702 GN=PHOS34 PE=1 SV=1	Signal transduction mechanisms	hypothetical protein HYC85_032250 [Camellia sinensis]
	VcUSP41	VaccDscaff46-augustus-gene-204.29	5.47689	5.30352	5.72048	3.07772	4.61414	1.4362	36.3257	39.5875	34.3937	0.15134	-0.783782	normal	3.55941e-73	2.72812	up	Signal transduction mechanisms	Universal stress protein family	--	Signal transduction mechanisms	hypothetical protein C3L33_03978, partial [Rhododendron williamsianum]
	VcUSP68	VaccDscaff37-augustus-gene-110.26	1.4858	0.864989	1.29142	1.60591	1.39315	1.6358	2.29748	3.29401	2.78279	0.541726	0.427773	normal	0.00306407	1.18836	up	--	Universal stress protein family	--	Function unknown	hypothetical protein C3L33_11341, partial [Rhododendron williamsianum]
Down-regulated	VcUSP4	VaccDscaff4-snap-gene-10.54	4.48845	5.72052	5.23593	2.83612	1.78005	2.08175	5.38027	1.54364	4.25639	9.69035e-05	-1.1256	down	0.405764	-0.474695	normal	Signal transduction mechanisms	Universal stress protein family	--	Function unknown	Universal stress protein [Actinidia chinensis var. chinensis]

## Sheet: Table S5
Table S5 The information of differential expressed genes (DEGs) from weighted gene co-expression network analysis (WGCNA) under UV-B and ABA treatments
UV-B treatment																		ABA treatment
kMEblue module									kMEturquoise module									kMEblue module
Gene ID	COG_class_annotation	KEGG_annotation	KEGG_pathway_annotation	Pfam_annotation	Swiss-Prot_annotation	eggNOG_class_annotation	NR_annotation		Gene ID	COG_class_annotation	KEGG_annotation	KEGG_pathway_annotation	Pfam_annotation	Swiss-Prot_annotation	eggNOG_class_annotation	NR_annotation		Gene ID	COG_class_annotation	KEGG_annotation	KEGG_pathway_annotation	Pfam_annotation	Swiss-Prot_annotation	eggNOG_class_annotation	NR_annotation
VaccDscaff6-augustus-gene-216.11	--	--	--	Universal stress protein family	--	Function unknown	hypothetical protein C3L33_11341, partial [Rhododendron williamsianum]		VaccDscaff27-snap-gene-82.31	Translation, ribosomal structure and biogenesis	K12891|1.1e-62|pmum:103339623|K12891 splicing factor, arginine/serine-rich 2 | (RefSeq) serine/arginine-rich splicing factor SC35	Spliceosome (ko03040)	RNA recognition motif. (a.k.a. RRM, RBD, or RNP domain)	Serine/arginine-rich splicing factor SC35 OS=Arabidopsis thaliana OX=3702 GN=SC35 PE=1 SV=1	RNA processing and modification	hypothetical protein C3L33_19767, partial [Rhododendron williamsianum]		VaccDscaff20-augustus-gene-275.19	--	K19720|1.2e-08|cvr:CHLNCDRAFT_142094|K19720 collagen type III alpha | (RefSeq) hypothetical protein	--	Zn-finger in Ran binding protein and others	--	Function unknown	Zinc finger, RanBP2-type protein [Actinidia chinensis var. chinensis]
VaccDscaff2-augustus-gene-418.25	--	K19729|2.6e-42|tcc:18588166|K19729 guanine nucleotide-binding protein G(t) subunit alpha 3 | (RefSeq) guanine nucleotide-binding protein alpha-1 subunit	--	G-protein alpha subunit	Extra-large guanine nucleotide-binding protein 1 OS=Arabidopsis thaliana OX=3702 GN=XLG1 PE=1 SV=2	--	hypothetical protein TEA_021476 [Camellia sinensis var. sinensis]		VaccDscaff12-augustus-gene-38.29	--	--	--	--	--	--	hypothetical protein C3L33_11246, partial [Rhododendron williamsianum]		VaccDscaff17-processed-gene-345.10	--	--	--	--	--	Function unknown	hypothetical protein TorRG33x02_147550 [Trema orientale]
VaccDscaff5-augustus-gene-56.25	--	K19861|4.2e-181|zju:107432782|K19861 benzyl alcohol O-benzoyltransferase [EC:2.3.1.196 2.3.1.232] | (RefSeq) benzyl alcohol O-benzoyltransferase-like	--	Transferase family	Benzyl alcohol O-benzoyltransferase OS=Nicotiana tabacum OX=4097 GN=HSR201 PE=1 SV=1	Function unknown	hypothetical protein G4B88_015891 [Cannabis sativa]		VaccDscaff33-augustus-gene-316.14	Energy production and conversion	K00029|3.1e-307|sind:105173548|K00029 malate dehydrogenase (oxaloacetate-decarboxylating)(NADP+) [EC:1.1.1.40] | (RefSeq) NADP-dependent malic enzyme	Pyruvate metabolism (ko00620);; Carbon fixation in photosynthetic organisms (ko00710);; Carbon metabolism (ko01200)	Malic enzyme, NAD binding domain	NADP-dependent malic enzyme OS=Vitis vinifera OX=29760 PE=2 SV=1	Energy production and conversion	NADP-dependent malic enzyme like [Actinidia chinensis var. chinensis]		VaccDscaff5-processed-gene-184.6	--	K01870|4.9e-09|smo:SELMODRAFT_437676|K01870 isoleucyl-tRNA synthetase [EC:6.1.1.5] | (RefSeq) hypothetical protein	Aminoacyl-tRNA biosynthesis (ko00970)	Transcriptional repressor, ovate	Transcription repressor OFP4 OS=Arabidopsis thaliana OX=3702 GN=OFP4 PE=1 SV=1	Function unknown	hypothetical protein C3L33_12285, partial [Rhododendron williamsianum]
VaccDscaff9-snap-gene-264.34		K13416|4.6e-77|mdm:103416333|K13416 brassinosteroid insensitive 1-associated receptor kinase 1 [EC:2.7.10.1 2.7.11.1] | (RefSeq) BRASSINOSTEROID INSENSITIVE 1-associated receptor kinase 1-like isoform X1	MAPK signaling pathway - plant (ko04016);; Plant hormone signal transduction (ko04075);; Plant-pathogen interaction (ko04626)	Protein tyrosine and serine/threonine kinase	Cysteine-rich receptor-like protein kinase 2 OS=Arabidopsis thaliana OX=3702 GN=CRK2 PE=1 SV=1	Signal transduction mechanisms	uncharacterized protein LOC111492443 [Cucurbita maxima]		VaccDscaff48-snap-gene-89.34	Carbohydrate transport and metabolism	K01087|8.8e-170|tcc:18605366|K01087 trehalose 6-phosphate phosphatase [EC:3.1.3.12] | (RefSeq) trehalose-phosphate phosphatase A	Starch and sucrose metabolism (ko00500)	Trehalose-phosphatase	Probable trehalose-phosphate phosphatase G OS=Arabidopsis thaliana OX=3702 GN=TPPG PE=2 SV=1	Carbohydrate transport and metabolism	probable trehalose-phosphate phosphatase F isoform X1 [Camellia sinensis]		VaccDscaff16-augustus-gene-3.24	--	--	--	Plastocyanin-like domain	Uclacyanin 1 OS=Arabidopsis thaliana OX=3702 GN=UCC1 PE=1 SV=1	Function unknown	hypothetical protein C3L33_19132, partial [Rhododendron williamsianum]
VaccDscaff38-snap-gene-44.21	Carbohydrate transport and metabolism	K06617|0.0e+00|egr:104438576|K06617 raffinose synthase [EC:2.4.1.82] | (RefSeq) probable galactinol--sucrose galactosyltransferase 6 isoform X1	Galactose metabolism (ko00052)	Raffinose synthase or seed imbibition protein Sip1	Probable galactinol--sucrose galactosyltransferase 6 OS=Arabidopsis thaliana OX=3702 GN=RFS6 PE=2 SV=2	Function unknown	hypothetical protein C3L33_05408, partial [Rhododendron williamsianum]		VaccDscaff30-snap-gene-334.24	--	--	--	TFIIS helical bundle-like domain	--	Transcription	Serine-rich adhesin for platelets like [Actinidia chinensis var. chinensis]		VaccDscaff8-augustus-gene-388.20	Energy production and conversion	K09699|1.6e-187|ini:109148504|K09699 2-oxoisovalerate dehydrogenase E2 component (dihydrolipoyl transacylase) [EC:2.3.1.168] | (RefSeq) lipoamide acyltransferase component of branched-chain alpha-keto acid dehydrogenase complex, mitochondrial	Valine, leucine and isoleucine degradation (ko00280);; Propanoate metabolism (ko00640)	2-oxoacid dehydrogenases acyltransferase (catalytic domain)	Lipoamide acyltransferase component of branched-chain alpha-keto acid dehydrogenase complex, mitochondrial OS=Arabidopsis thaliana OX=3702 GN=BCE2 PE=1 SV=1	Energy production and conversion	lipoamide acyltransferase component of branched-chain alpha-keto acid dehydrogenase complex, mitochondrial [Camellia sinensis]
VaccDscaff15-augustus-gene-153.18	--	--	--	Cotton fibre expressed protein	--	Function unknown	Leucine zipper protein [Actinidia chinensis var. chinensis]		VaccDscaff39-augustus-gene-57.35	--	K03860|7.0e-28|nnu:104608881|K03860 phosphatidylinositol N-acetylglucosaminyltransferase subunit Q | (RefSeq) N-acetylglucosaminyl-phosphatidylinositol biosynthetic protein gpi1-like	Glycosylphosphatidylinositol (GPI)-anchor biosynthesis (ko00563)	Gibberellin regulated protein	Protein RSI-1 OS=Solanum lycopersicum OX=4081 GN=RSI-1 PE=2 SV=1	Function unknown	hypothetical protein F0562_004143 [Nyssa sinensis]		VaccDscaff147-augustus-gene-1.23	Coenzyme transport and metabolism;; Energy production and conversion	K09838|2.6e-24|zma:103641704|K09838 zeaxanthin epoxidase [EC:1.14.15.21] | (RefSeq) zeaxanthin epoxidase, chloroplastic isoform X1	Carotenoid biosynthesis (ko00906)	FAD binding domain	Monooxygenase 2 OS=Arabidopsis thaliana OX=3702 GN=MO2 PE=2 SV=1	Energy production and conversion;; Coenzyme transport and metabolism	monooxygenase 2-like [Camellia sinensis]
VaccDscaff89-processed-gene-0.22	--	K00326|4.1e-16|ccav:112516820|K00326 cytochrome-b5 reductase [EC:1.6.2.2] | (RefSeq) NADH-cytochrome b5 reductase-like protein	Amino sugar and nucleotide sugar metabolism (ko00520)	Domain of unknown function (DUF4666)	Uncharacterized protein At1g15400 OS=Arabidopsis thaliana OX=3702 GN=At1g15400 PE=1 SV=2	Function unknown	hypothetical protein C3L33_03685, partial [Rhododendron williamsianum]		VaccDscaff40-processed-gene-2.4	--	K14399|7.5e-44|csl:COCSUDRAFT_47181|K14399 polyribonucleotide 5'-hydroxyl-kinase [EC:2.7.1.78] | (RefSeq) Clp1-domain-containing protein	mRNA surveillance pathway (ko03015)	CRAL/TRIO domain	Phosphatidylinositol/phosphatidylcholine transfer protein SFH12 OS=Arabidopsis thaliana OX=3702 GN=SFH12 PE=2 SV=1	Lipid transport and metabolism	hypothetical protein C3L33_11044, partial [Rhododendron williamsianum]		VaccDscaff29-augustus-gene-71.32	--	K23553|1.7e-169|mesc:110617516|K23553 post-GPI attachment to proteins factor 3 | (RefSeq) post-GPI attachment to proteins factor 3-like	--	Per1-like family	--	Function unknown	post-GPI attachment to proteins factor 3 [Camellia sinensis]
VaccDscaff27-processed-gene-242.7	--	--	--	--	--	Translation, ribosomal structure and biogenesis	PREDICTED: uncharacterized protein LOC105952159 [Erythranthe guttata]		VaccDscaff37-processed-gene-250.18	--	--	--	Agglutinin domain	--	Function unknown	hypothetical protein C3L33_19507, partial [Rhododendron williamsianum]		VaccDscaff44-augustus-gene-65.21	--	K09286|6.7e-19|bna:106427325|K09286 EREBP-like factor | (RefSeq) ethylene-responsive transcription factor ERF057	--	AP2 domain	Ethylene-responsive transcription factor ERF003 OS=Arabidopsis thaliana OX=3702 GN=ERF003 PE=1 SV=1	Transcription	hypothetical protein HYC85_027416 [Camellia sinensis]
VaccDscaff18-augustus-gene-318.22	--	K13379|3.7e-199|sly:543938|K13379 reversibly glycosylated polypeptide / UDP-arabinopyranose mutase [EC:2.4.1.- 5.4.99.30] | (RefSeq) UDP-glucose:protein transglucosylase-like protein SlUPTG1	Amino sugar and nucleotide sugar metabolism (ko00520)	Reversibly glycosylated polypeptide	UDP-arabinopyranose mutase 1 OS=Oryza sativa subsp. japonica OX=39947 GN=UAM1 PE=1 SV=1	Translation, ribosomal structure and biogenesis	probable UDP-arabinopyranose mutase 2 [Camellia sinensis]		VaccDscaff18-augustus-gene-377.36	--	--	--	Ubiquitin family	BAG family molecular chaperone regulator 1 OS=Arabidopsis thaliana OX=3702 GN=BAG1 PE=1 SV=1	Posttranslational modification, protein turnover, chaperones	hypothetical protein HYC85_002799 [Camellia sinensis]		VaccDscaff7-augustus-gene-360.32	--	K16222|1.0e-58|csat:104740088|K16222 Dof zinc finger protein DOF5.5 | (RefSeq) cyclic dof factor 1	Circadian rhythm - plant (ko04712)	Dof domain, zinc finger	Cyclic dof factor 2 OS=Arabidopsis thaliana OX=3702 GN=CDF2 PE=1 SV=2	Function unknown	hypothetical protein C3L33_18814, partial [Rhododendron williamsianum]
VaccDscaff32-augustus-gene-304.46	Secondary metabolites biosynthesis, transport and catabolism;; Defense mechanisms	K13260|1.8e-194|zju:107424876|K13260 isoflavone/4'-methoxyisoflavone 2'-hydroxylase [EC:1.14.14.90 1.14.14.89] | (RefSeq) cytochrome P450 81E8-like	Isoflavonoid biosynthesis (ko00943)	Cytochrome P450	Cytochrome P450 81Q32 OS=Catharanthus roseus OX=4058 GN=CYP81Q32 PE=2 SV=1	Secondary metabolites biosynthesis, transport and catabolism	hypothetical protein C3L33_18401, partial [Rhododendron williamsianum]		VaccDscaff3-augustus-gene-304.37	--	K02184|9.3e-173|ini:109182789|K02184 formin 2 | (RefSeq) formin-like protein 1	--	Formin Homology 2 Domain	Formin-like protein 1 OS=Arabidopsis thaliana OX=3702 GN=FH1 PE=1 SV=1	--	hypothetical protein C3L33_17679, partial [Rhododendron williamsianum]		VaccDscaff17-augustus-gene-348.31	--	K14484|5.7e-67|jcu:105634940|K14484 auxin-responsive protein IAA | (RefSeq) auxin-responsive protein IAA1	Plant hormone signal transduction (ko04075)	AUX/IAA family	Auxin-responsive protein IAA17 OS=Arabidopsis thaliana OX=3702 GN=IAA17 PE=1 SV=2	Function unknown	Auxin-responsive protein [Actinidia chinensis var. chinensis]
VaccDscaff27-augustus-gene-9.11	--	K00430|5.8e-135|qsu:112038358|K00430 peroxidase [EC:1.11.1.7] | (RefSeq) cationic peroxidase 1-like	Phenylpropanoid biosynthesis (ko00940)	Peroxidase	Cationic peroxidase 1 OS=Arachis hypogaea OX=3818 GN=PNC1 PE=1 SV=2	Secondary metabolites biosynthesis, transport and catabolism	Cationic peroxidase [Actinidia chinensis var. chinensis]		VaccDscaff2-processed-gene-446.4	--	--	--	Phosphate-induced protein 1 conserved region	Protein EXORDIUM-like 5 OS=Arabidopsis thaliana OX=3702 GN=EXL5 PE=2 SV=1	Function unknown	hypothetical protein HYC85_009398 [Camellia sinensis]		VaccDscaff40-augustus-gene-118.21	--	K03097|5.2e-18|aip:107632886|K03097 casein kinase II subunit alpha [EC:2.7.11.1] | (RefSeq) casein kinase II subunit alpha-like isoform X3	Ribosome biogenesis in eukaryotes (ko03008);; Circadian rhythm - plant (ko04712)	Protein of unknown function (DUF642)	--	Function unknown	hypothetical protein F0562_018732 [Nyssa sinensis]
VaccDscaff5-augustus-gene-339.41	--	K00430|9.0e-147|hbr:110655611|K00430 peroxidase [EC:1.11.1.7] | (RefSeq) peroxidase 3-like	Phenylpropanoid biosynthesis (ko00940)	Peroxidase	Peroxidase 3 OS=Arabidopsis thaliana OX=3702 GN=PER3 PE=2 SV=1	Secondary metabolites biosynthesis, transport and catabolism	hypothetical protein C3L33_11918, partial [Rhododendron williamsianum]		VaccDscaff32-processed-gene-59.7	--	--	--	Cotton fibre expressed protein	--	Function unknown	hypothetical protein C3L33_19282, partial [Rhododendron williamsianum]		VaccDscaff5-augustus-gene-394.53	--	--	--	--	--	Function unknown	hypothetical protein C3L33_11699, partial [Rhododendron williamsianum]
VaccDscaff35-processed-gene-113.16	--	K03676|6.1e-36|lja:Lj6g3v2006480.1|K03676 glutaredoxin 3 | (RefSeq) Lj6g3v2006480.1; -	--	Glutaredoxin	Glutaredoxin-C9 OS=Arabidopsis thaliana OX=3702 GN=GRXC9 PE=1 SV=1	Posttranslational modification, protein turnover, chaperones	hypothetical protein C3L33_23005, partial [Rhododendron williamsianum]		VaccDscaff2-processed-gene-104.5	--	K00799|5.1e-39|dzi:111298889|K00799 glutathione S-transferase [EC:2.5.1.18] | (RefSeq) probable glutathione S-transferase	Glutathione metabolism (ko00480)	Glutathione S-transferase, C-terminal domain	Probable glutathione S-transferase parA OS=Nicotiana tabacum OX=4097 GN=PARA PE=2 SV=1	Posttranslational modification, protein turnover, chaperones	hypothetical protein C3L33_11783, partial [Rhododendron williamsianum]		VaccDscaff27-augustus-gene-32.20	--	K20628|2.9e-103|lang:109327136|K20628 expansin | (RefSeq) expansin-A8-like	--	Expansin C-terminal domain	Expansin-A6 OS=Arabidopsis thaliana OX=3702 GN=EXPA6 PE=2 SV=2	Carbohydrate transport and metabolism	Expansin-A6 like [Actinidia chinensis var. chinensis]
VaccDscaff29-processed-gene-9.7	--	--	--	Cupin	Auxin-binding protein ABP19a OS=Prunus persica OX=3760 GN=ABP19A PE=3 SV=1	Posttranslational modification, protein turnover, chaperones	hypothetical protein DVH24_029514 [Malus domestica]		VaccDscaff14-augustus-gene-8.27	Amino acid transport and metabolism	K18266|1.0e-140|vvi:100262295|K18266 protein NDRG1 | (RefSeq) pollen-specific protein SF21	--	Ndr family	Protein NDL2 OS=Arabidopsis thaliana OX=3702 GN=NDL2 PE=1 SV=1	Function unknown	hypothetical protein F0562_006960 [Nyssa sinensis]		VaccDscaff26-augustus-gene-1.29	--	K19366|3.4e-57|rcu:8260656|K19366 spartin | (RefSeq) protein EARLY-RESPONSIVE TO DEHYDRATION 7, chloroplastic	Endocytosis (ko04144)	Senescence-associated protein	Senescence/dehydration-associated protein At4g35985, chloroplastic OS=Arabidopsis thaliana OX=3702 GN=P85 PE=2 SV=1	Function unknown	Senescence/dehydration-associated protein [Actinidia chinensis var. chinensis]
VaccDscaff29-augustus-gene-142.29	Signal transduction mechanisms	K14497|4.9e-155|sind:105171935|K14497 protein phosphatase 2C [EC:3.1.3.16] | (RefSeq) protein phosphatase 2C 37-like	MAPK signaling pathway - plant (ko04016);; Plant hormone signal transduction (ko04075)	Protein phosphatase 2C	Protein phosphatase 2C 37 OS=Arabidopsis thaliana OX=3702 GN=PP2CA PE=1 SV=1	Signal transduction mechanisms	hypothetical protein TEA_017902 [Camellia sinensis var. sinensis]		VaccDscaff39-augustus-gene-91.17	--	--	--	zinc-finger of the FCS-type, C2-C2	FCS-Like Zinc finger 5 OS=Arabidopsis thaliana OX=3702 GN=FLZ5 PE=1 SV=1	Function unknown	FCS-Like Zinc finger 6-like [Camellia sinensis]		VaccDscaff38-augustus-gene-3.29	--	K13065|1.8e-145|vvi:100246835|K13065 shikimate O-hydroxycinnamoyltransferase [EC:2.3.1.133] | (RefSeq) spermidine hydroxycinnamoyl transferase-like	Phenylpropanoid biosynthesis (ko00940);; Flavonoid biosynthesis (ko00941);; Stilbenoid, diarylheptanoid and gingerol biosynthesis (ko00945)	Transferase family	Spermidine hydroxycinnamoyl transferase OS=Arabidopsis thaliana OX=3702 GN=SHT PE=1 SV=1	Function unknown	hypothetical protein C3L33_05535, partial [Rhododendron williamsianum]
VaccDscaff21-augustus-gene-108.29	--	K01859|3.8e-98|mdm:103430446|K01859 chalcone isomerase [EC:5.5.1.6] | (RefSeq) probable chalcone--flavonone isomerase 3 isoform X1	Flavonoid biosynthesis (ko00941)	Chalcone-flavanone isomerase	Probable chalcone--flavonone isomerase 3 OS=Arabidopsis thaliana OX=3702 GN=CHI3 PE=1 SV=1	Function unknown	chalcone isomerase [Vaccinium corymbosum]		VaccDscaff14-augustus-gene-192.34	Secondary metabolites biosynthesis, transport and catabolism;; Defense mechanisms	K05917|4.0e-252|nta:107764727|K05917 sterol 14alpha-demethylase [EC:1.14.14.154 1.14.15.36] | (RefSeq) CYP51; sterol 14-demethylase-like	Steroid biosynthesis (ko00100)	Cytochrome P450	Sterol 14-demethylase OS=Arabidopsis thaliana OX=3702 GN=CYP51G1 PE=1 SV=1	Secondary metabolites biosynthesis, transport and catabolism	Sterol 14-demethylase [Actinidia chinensis var. chinensis]		VaccDscaff413-augustus-gene-0.23	--	K13065|1.8e-145|vvi:100246835|K13065 shikimate O-hydroxycinnamoyltransferase [EC:2.3.1.133] | (RefSeq) spermidine hydroxycinnamoyl transferase-like	Phenylpropanoid biosynthesis (ko00940);; Flavonoid biosynthesis (ko00941);; Stilbenoid, diarylheptanoid and gingerol biosynthesis (ko00945)	Transferase family	Spermidine hydroxycinnamoyl transferase OS=Arabidopsis thaliana OX=3702 GN=SHT PE=1 SV=1	Function unknown	hypothetical protein C3L33_05535, partial [Rhododendron williamsianum]
VaccDscaff19-augustus-gene-121.20	--	K13081|1.2e-138|qsu:112036510|K13081 leucoanthocyanidin reductase [EC:1.17.1.3] | (RefSeq) leucoanthocyanidin reductase-like	Flavonoid biosynthesis (ko00941)	NmrA-like family	Leucoanthocyanidin reductase OS=Desmodium uncinatum OX=225101 GN=LAR PE=1 SV=1	Function unknown	leucoanthocyanidin reductase [Vaccinium ashei]		VaccDscaff17-augustus-gene-368.23	--	K09286|9.7e-113|sind:105157874|K09286 EREBP-like factor | (RefSeq) ethylene-responsive transcription factor RAP2-12-like isoform X1	--	AP2 domain	Ethylene-responsive transcription factor RAP2-2 OS=Arabidopsis thaliana OX=3702 GN=RAP2-2 PE=1 SV=2	Transcription	hypothetical protein C3L33_00084, partial [Rhododendron williamsianum]		VaccDscaff23-augustus-gene-305.41	Signal transduction mechanisms	K20181|5.5e-78|mtr:MTR_5g026090|K20181 vacuolar protein sorting-associated protein 18 | (RefSeq) vacuolar sorting-associated-like protein	--	Leucine rich repeat	Receptor kinase-like protein Xa21 OS=Oryza sativa subsp. indica OX=39946 GN=XA21 PE=1 SV=1	Function unknown	probable LRR receptor-like serine/threonine-protein kinase At3g47570 [Camellia sinensis]
VaccDscaff37-augustus-gene-303.53	Lipid transport and metabolism;; Secondary metabolites biosynthesis, transport and catabolism	K01904|9.4e-266|jcu:105635600|K01904 4-coumarate--CoA ligase [EC:6.2.1.12] | (RefSeq) 4-coumarate--CoA ligase 2	Ubiquinone and other terpenoid-quinone biosynthesis (ko00130);; Phenylpropanoid biosynthesis (ko00940)	AMP-binding enzyme	4-coumarate--CoA ligase 2 OS=Nicotiana tabacum OX=4097 GN=4CL2 PE=1 SV=1	Lipid transport and metabolism	4-coumarate--CoA ligase [Actinidia chinensis var. chinensis]		VaccDscaff41-processed-gene-236.27	--	--	--	Protein DA1	Protein DA1-related 1 OS=Arabidopsis thaliana OX=3702 GN=DAR1 PE=1 SV=3	--	hypothetical protein C3L33_09549, partial [Rhododendron williamsianum]		VaccDscaff4-augustus-gene-14.26	Carbohydrate transport and metabolism	K01213|8.1e-152|aip:107645968|K01213 galacturan 1,4-alpha-galacturonidase [EC:3.2.1.67] | (RefSeq) polygalacturonase At1g48100-like	Pentose and glucuronate interconversions (ko00040)	Glycosyl hydrolases family 28	Polygalacturonase At1g48100 OS=Arabidopsis thaliana OX=3702 GN=At1g48100 PE=2 SV=1	Cell wall/membrane/envelope biogenesis	hypothetical protein C3L33_14808, partial [Rhododendron williamsianum]
VaccDscaff75-processed-gene-4.1	--	--	--	--	--	--	hypothetical protein C3L33_03746, partial [Rhododendron williamsianum]		VaccDscaff3-augustus-gene-300.20	--	K05765|3.6e-08|gra:105781290|K05765 cofilin | (RefSeq) uncharacterized LOC105781290	--	--	Transcription factor bHLH153 OS=Arabidopsis thaliana OX=3702 GN=BHLH153 PE=1 SV=1	Transcription	transcription factor BHLH005, partial [Vaccinium corymbosum]		VaccDscaff14-augustus-gene-350.31	--	--	--	--	--	--	hypothetical protein CK203_078868 [Vitis vinifera]
VaccDscaff34-augustus-gene-303.25		K01180|5.0e-66|cmax:111487562|K01180 endo-1,3(4)-beta-glucanase [EC:3.2.1.6] | (RefSeq) uncharacterized protein LOC111487562	--	Protein kinase domain	Cold-responsive protein kinase 1 OS=Arabidopsis thaliana OX=3702 GN=CRPK1 PE=1 SV=1	Signal transduction mechanisms	Serine/threonine-protein kinase [Actinidia chinensis var. chinensis]		VaccDscaff41-augustus-gene-192.15	Posttranslational modification, protein turnover, chaperones	K15333|1.9e-185|nsy:104224633|K15333 tRNA guanosine-2'-O-methyltransferase [EC:2.1.1.34] | (RefSeq) uncharacterized protein LOC104224633	--	Subtilase family	Subtilisin-like protease SBT2.6 OS=Arabidopsis thaliana OX=3702 GN=SBT2.6 PE=2 SV=1	Posttranslational modification, protein turnover, chaperones	Subtilisin-like protease [Actinidia chinensis var. chinensis]		VaccDscaff11-augustus-gene-164.28		K13430|4.1e-68|egr:104417320|K13430 serine/threonine-protein kinase PBS1 [EC:2.7.11.1] | (RefSeq) serine/threonine-protein kinase CDL1	Plant-pathogen interaction (ko04626)	Protein kinase domain	Cold-responsive protein kinase 1 OS=Arabidopsis thaliana OX=3702 GN=CRPK1 PE=1 SV=1	Signal transduction mechanisms	hypothetical protein C3L33_06245, partial [Rhododendron williamsianum]
VaccDscaff1-augustus-gene-22.33	--	--	--	Pathogenesis-related protein Bet v 1 family	Major allergen Pru ar 1 OS=Prunus armeniaca OX=36596 PE=1 SV=1	Function unknown	Major allergen Pru ar like [Actinidia chinensis var. chinensis]		VaccDscaff29-augustus-gene-12.29	Replication, recombination and repair	K19036|2.0e-98|pavi:110771490|K19036 ATP-dependent RNA/DNA helicase IGHMBP2 [EC:3.6.4.12 3.6.4.13] | (RefSeq) DNA-binding protein SMUBP-2	--	AAA domain	Regulator of nonsense transcripts 1 homolog OS=Arabidopsis thaliana OX=3702 GN=UPF1 PE=1 SV=2	Replication, recombination and repair	DNA-binding protein SMUBP-2 isoform X2 [Camellia sinensis]		VaccDscaff13-augustus-gene-69.39	Energy production and conversion;; General function prediction only	K18980|2.4e-133|mcha:111019164|K18980 2-methylene-furan-3-one reductase [EC:1.3.1.105] | (RefSeq) NADPH-dependent alkenal/one oxidoreductase, chloroplastic-like	--	Zinc-binding dehydrogenase	2-methylene-furan-3-one reductase OS=Solanum lycopersicum OX=4081 GN=EO PE=1 SV=1	Energy production and conversion	hypothetical protein C3L33_01596, partial [Rhododendron williamsianum]
VaccDscaff37-processed-gene-97.9	--	K16221|4.2e-33|pda:103705196|K16221 transcription factor TCP21 (protein CCA1 HIKING EXPEDITION) | (RefSeq) transcription factor TCP7-like	Circadian rhythm - plant (ko04712)	TCP family transcription factor	Transcription factor TCP23 OS=Arabidopsis thaliana OX=3702 GN=TCP23 PE=1 SV=1	Transcription	hypothetical protein F0562_002955 [Nyssa sinensis]		VaccDscaff42-snap-gene-50.34	Inorganic ion transport and metabolism	K17469|3.3e-268|vvi:100257574|K17469 sulfate transporter 2, low-affinity | (RefSeq) low affinity sulfate transporter 3	--	Sulfate permease family	Sulfate transporter 2.1 OS=Arabidopsis thaliana OX=3702 GN=SULTR2;1 PE=2 SV=1	Inorganic ion transport and metabolism	Sulfate transporter 2.1 like [Actinidia chinensis var. chinensis]		VaccDscaff29-augustus-gene-121.23	Inorganic ion transport and metabolism	K00522|7.9e-103|spen:107020362|K00522 ferritin heavy chain [EC:1.16.3.2] | (RefSeq) ferritin-2, chloroplastic	--	Ferritin-like domain	Ferritin-3, chloroplastic OS=Glycine max OX=3847 PE=2 SV=1	Inorganic ion transport and metabolism	ferritin-3, chloroplastic-like [Camellia sinensis]
VaccDscaff13-augustus-gene-9.36	--	--	--	--	Stress enhanced protein 2, chloroplastic OS=Arabidopsis thaliana OX=3702 GN=SEP2 PE=2 SV=1	Function unknown	hypothetical protein C3L33_01923, partial [Rhododendron williamsianum]		VaccDscaff2-snap-gene-96.26	--	K17065|1.5e-97|gsl:Gasu_23230|K17065 dynamin 1-like protein [EC:3.6.5.5] | (RefSeq) dynamin GTPase	--	Dynamin central region	Dynamin-related protein 1C OS=Arabidopsis thaliana OX=3702 GN=DRP1C PE=1 SV=2	Intracellular trafficking, secretion, and vesicular transport	dynamin-related protein 1C [Camellia sinensis]		VaccDscaff645-processed-gene-0.4	--	--	--	Leucine rich repeat	DNA damage-repair/toleration protein DRT100 OS=Arabidopsis thaliana OX=3702 GN=DRT100 PE=2 SV=2	Function unknown	hypothetical protein F0562_014515 [Nyssa sinensis]
VaccDscaff2-augustus-gene-397.31	--	K07374|2.0e-261|cit:102609137|K07374 tubulin alpha | (RefSeq) tubulin alpha chain	Phagosome (ko04145)	Tubulin/FtsZ family, GTPase domain	Tubulin alpha-3 chain OS=Hordeum vulgare OX=4513 GN=TUBA3 PE=2 SV=1	Cytoskeleton	tubulin alpha chain [Citrus sinensis]		VaccDscaff47-augustus-gene-66.27	--	--	--	Domain of unknown function (DUF966)	Protein UPSTREAM OF FLC OS=Arabidopsis thaliana OX=3702 GN=UFC PE=2 SV=1	Function unknown	hypothetical protein C3L33_22239, partial [Rhododendron williamsianum]		VaccDscaff12-snap-gene-143.35	--	K03251|7.2e-52|obr:102709085|K03251 translation initiation factor 3 subunit D | (RefSeq) eukaryotic translation initiation factor 3 subunit D-like	RNA transport (ko03013)	Cold acclimation protein WCOR413	Cold-regulated 413 inner membrane protein 1, chloroplastic OS=Arabidopsis thaliana OX=3702 GN=COR413IM1 PE=1 SV=1	Function unknown	Cold-regulated 413 inner membrane protein [Actinidia chinensis var. chinensis]
VaccDscaff2-processed-gene-242.18	Posttranslational modification, protein turnover, chaperones	K02737|2.9e-136|ghi:107922441|K02737 20S proteasome subunit beta 5 [EC:3.4.25.1] | (RefSeq) proteasome subunit beta type-5	Proteasome (ko03050)	Proteasome subunit	Proteasome subunit beta type-5 OS=Spinacia oleracea OX=3562 PE=2 SV=1	Posttranslational modification, protein turnover, chaperones	hypothetical protein C3L33_13372, partial [Rhododendron williamsianum]		VaccDscaff41-processed-gene-272.14	General function prediction only	K14152|7.0e-51|cpep:111783531|K14152 phosphoribosyl-ATP pyrophosphohydrolase / phosphoribosyl-AMP cyclohydrolase / histidinol dehydrogenase [EC:3.6.1.31 3.5.4.19 1.1.1.23] | (RefSeq) uncharacterized protein LOC111783531	Histidine metabolism (ko00340);; Biosynthesis of amino acids (ko01230)	--	Protein POLLENLESS 3-LIKE 2 OS=Arabidopsis thaliana OX=3702 GN=At3g51280 PE=2 SV=1	Function unknown	Protein POLLENLESS 3-LIKE like [Actinidia chinensis var. chinensis]		VaccDscaff43-augustus-gene-40.46	--	K09422|3.2e-80|nnu:104600871|K09422 transcription factor MYB, plant | (RefSeq) myb-related protein Myb4	--	Myb-like DNA-binding domain	Transcription factor MYB14 OS=Arabidopsis thaliana OX=3702 GN=MYB14 PE=2 SV=1	Transcription	hypothetical protein HYC85_025010 [Camellia sinensis]
VaccDscaff16-augustus-gene-144.17	--	K04498|3.3e-12|tcc:18602114|K04498 E1A/CREB-binding protein [EC:2.3.1.48] | (RefSeq) histone acetyltransferase HAC12	--	TAZ zinc finger	BTB/POZ and TAZ domain-containing protein 4 OS=Arabidopsis thaliana OX=3702 GN=BT4 PE=1 SV=1	Transcription	BTB/POZ and TAZ domain-containing protein [Actinidia chinensis var. chinensis]		VaccDscaff19-processed-gene-21.3	--	K05280|7.5e-47|rcu:8284440|K05280 flavonoid 3'-monooxygenase [EC:1.14.14.82] | (RefSeq) flavonoid 3'-monooxygenase	Flavonoid biosynthesis (ko00941);; Flavone and flavonol biosynthesis (ko00944)	AP2 domain	Ethylene-responsive transcription factor ERF026 OS=Arabidopsis thaliana OX=3702 GN=ERF026 PE=2 SV=1	Transcription	hypothetical protein C3L33_16448, partial [Rhododendron williamsianum]		VaccDscaff17-augustus-gene-250.41	--	K22763|8.2e-103|egu:105032347|K22763 deubiquitinase DESI2 [EC:3.4.19.12] | (RefSeq) deSI-like protein At4g17486 isoform X2	--	PPPDE putative peptidase domain	DeSI-like protein At4g17486 OS=Arabidopsis thaliana OX=3702 GN=At4g17486 PE=2 SV=1	Function unknown	hypothetical protein C3L33_19541, partial [Rhododendron williamsianum]
VaccDscaff32-augustus-gene-323.42	--	--	--	--	--	Function unknown	hypothetical protein HYC85_005988 [Camellia sinensis]		VaccDscaff27-augustus-gene-318.43	--	K14484|3.7e-126|vvi:100253148|K14484 auxin-responsive protein IAA | (RefSeq) auxin-responsive protein IAA27	Plant hormone signal transduction (ko04075)	AUX/IAA family	Auxin-responsive protein IAA27 OS=Arabidopsis thaliana OX=3702 GN=IAA27 PE=1 SV=1	Transcription	hypothetical protein C3L33_00248, partial [Rhododendron williamsianum]		VaccDscaff16-augustus-gene-389.37	Posttranslational modification, protein turnover, chaperones	K16290|4.9e-166|zju:107425662|K16290 xylem cysteine proteinase [EC:3.4.22.-] | (RefSeq) cysteine protease XCP1	--	Papain family cysteine protease	Cysteine protease XCP1 OS=Arabidopsis thaliana OX=3702 GN=XCP1 PE=1 SV=1	Posttranslational modification, protein turnover, chaperones	Cysteine protease [Actinidia chinensis var. chinensis]
VaccDscaff9-processed-gene-2.24	--	--	--	--	--	--	hypothetical protein C3L33_14819, partial [Rhododendron williamsianum]		VaccDscaff8-augustus-gene-263.23	--	K01803|1.2e-21|sbi:8057784|K01803 triosephosphate isomerase (TIM) [EC:5.3.1.1] | (RefSeq) triosephosphate isomerase, cytosolic	Glycolysis / Gluconeogenesis (ko00010);; Fructose and mannose metabolism (ko00051);; Inositol phosphate metabolism (ko00562);; Carbon fixation in photosynthetic organisms (ko00710);; Carbon metabolism (ko01200);; Biosynthesis of amino acids (ko01230)	C2 domain	Elicitor-responsive protein 1 OS=Oryza sativa subsp. indica OX=39946 GN=ERG1 PE=2 SV=2	Function unknown	Elicitor-responsive protein [Actinidia chinensis var. chinensis]		VaccDscaff13-processed-gene-301.3	Posttranslational modification, protein turnover, chaperones	K15333|1.8e-89|nsy:104224633|K15333 tRNA guanosine-2'-O-methyltransferase [EC:2.1.1.34] | (RefSeq) uncharacterized protein LOC104224633	--	Subtilase family	Subtilisin-like protease SBT1.6 OS=Arabidopsis thaliana OX=3702 GN=SBT1.6 PE=2 SV=1	Posttranslational modification, protein turnover, chaperones	Subtilisin-like protease [Actinidia chinensis var. chinensis]
VaccDscaff9-snap-gene-122.24	Defense mechanisms	K03327|1.8e-226|qsu:112024546|K03327 multidrug resistance protein, MATE family | (RefSeq) protein DETOXIFICATION 40-like	--	MatE	Protein DETOXIFICATION 40 OS=Arabidopsis thaliana OX=3702 GN=DTX40 PE=1 SV=1	Replication, recombination and repair	multidrug and toxic extrusion transporter [Vaccinium corymbosum]		VaccDscaff14-snap-gene-324.43	--	--	--	--	Protein LNK1 OS=Arabidopsis thaliana OX=3702 GN=LNK1 PE=1 SV=1	Function unknown	hypothetical protein C3L33_21150, partial [Rhododendron williamsianum]		VaccDscaff12-snap-gene-48.26	Lipid transport and metabolism;; General function prediction only	K00679|2.3e-67|cic:CICLE_v10027727mg|K00679 phospholipid:diacylglycerol acyltransferase [EC:2.3.1.158] | (RefSeq) hypothetical protein	Glycerolipid metabolism (ko00561)	GDSL-like Lipase/Acylhydrolase	GDSL esterase/lipase EXL3 OS=Arabidopsis thaliana OX=3702 GN=EXL3 PE=2 SV=1	Function unknown	GDSL esterase/lipase [Actinidia chinensis var. chinensis]
VaccDscaff10-augustus-gene-260.15	Carbohydrate transport and metabolism	K08193|1.9e-178|nsy:104249188|K08193 MFS transporter, ACS family, solute carrier family 17 (sodium-dependent inorganic phosphate cotransporter), other | (RefSeq) probable anion transporter 3, chloroplastic	--	Major Facilitator Superfamily	Probable anion transporter 3, chloroplastic OS=Arabidopsis thaliana OX=3702 GN=ANTR3 PE=2 SV=2	Carbohydrate transport and metabolism	probable anion transporter 3, chloroplastic [Camellia sinensis]		VaccDscaff3-processed-gene-220.20	--	K23452|8.3e-139|eus:EUTSA_v10009957mg|K23452 UDP-glucosyltransferase 85A [EC:2.4.1.-] | (RefSeq) hypothetical protein	Zeatin biosynthesis (ko00908)	UDP-glucoronosyl and UDP-glucosyl transferase	7-deoxyloganetin glucosyltransferase OS=Gardenia jasminoides OX=114476 GN=UGT85A24 PE=1 SV=1	--	hypothetical protein F0562_028318 [Nyssa sinensis]		VaccDscaff37-snap-gene-217.34		K13418|1.6e-282|pxb:103931945|K13418 somatic embryogenesis receptor kinase 1 [EC:2.7.10.1 2.7.11.1] | (RefSeq) somatic embryogenesis receptor kinase 2	--	Protein kinase domain	LRR receptor kinase BAK1 OS=Oryza sativa subsp. indica OX=39946 GN=BAK1 PE=2 SV=1	Signal transduction mechanisms	LRR receptor kinase BAK1 [Camellia sinensis]
VaccDscaff25-augustus-gene-293.25	--	K13081|1.8e-140|qsu:112036510|K13081 leucoanthocyanidin reductase [EC:1.17.1.3] | (RefSeq) leucoanthocyanidin reductase-like	Flavonoid biosynthesis (ko00941)	NmrA-like family	Leucoanthocyanidin reductase OS=Desmodium uncinatum OX=225101 GN=LAR PE=1 SV=1	Function unknown	leucoanthocyanidin reductase [Vaccinium corymbosum]		VaccDscaff36-snap-gene-275.55	--	K17290|1.4e-11|apro:F751_3177|K17290 oxidoreductase [EC:1.1.1.-] | (RefSeq) Oxidoreductase HTATIP2	--	Chlorophyll A-B binding protein	Early light-induced protein 1, chloroplastic OS=Arabidopsis thaliana OX=3702 GN=ELIP1 PE=1 SV=1	Function unknown	putative chlorophyll A-B binding protein [Helianthus annuus]		VaccDscaff30-augustus-gene-268.25	--	--	--	Protein of unknown function (DUF632)	Protein ALTERED PHOSPHATE STARVATION RESPONSE 1 OS=Arabidopsis thaliana OX=3702 GN=APSR1 PE=2 SV=1	Function unknown	hypothetical protein C3L33_01904, partial [Rhododendron williamsianum]
VaccDscaff286-snap-gene-0.55	Energy production and conversion	K17871|1.3e-10|pavi:110772234|K17871 NADH:ubiquinone reductase (non-electrogenic) [EC:1.6.5.9] | (RefSeq) external alternative NAD(P)H-ubiquinone oxidoreductase B1, mitochondrial-like	--	Pyridine nucleotide-disulphide oxidoreductase	--	Energy production and conversion	hypothetical protein C3L33_04747, partial [Rhododendron williamsianum]		VaccDscaff32-augustus-gene-330.28	--	K21777|8.7e-174|nsy:104239770|K21777 G2/mitotic-specific cyclin-B, other | (RefSeq) G2/mitotic-specific cyclin-2-like	--	Cyclin, N-terminal domain	G2/mitotic-specific cyclin-1 OS=Medicago sativa subsp. varia OX=36902 PE=2 SV=1	Cell cycle control, cell division, chromosome partitioning	hypothetical protein C3L33_01758, partial [Rhododendron williamsianum]		VaccDscaff95-snap-gene-2.33	--	K13422|3.7e-15|mdm:103436897|K13422 transcription factor MYC2 | (RefSeq) transcription factor MYC2	MAPK signaling pathway - plant (ko04016);; Plant hormone signal transduction (ko04075)	Helix-loop-helix DNA-binding domain	Transcription factor bHLH35 OS=Arabidopsis thaliana OX=3702 GN=BHLH35 PE=2 SV=1	Transcription	transcription factor BHLH022, partial [Vaccinium corymbosum]
VaccDscaff22-augustus-gene-147.22	--	K22809|1.3e-29|osa:4336409|K22809 inositol phosphorylceramide glucuronosyltransferase 1 [EC:2.4.1.-] | (RefSeq) inositol phosphorylceramide glucuronosyltransferase 1	--	--	Putative glucuronosyltransferase PGSIP7 OS=Arabidopsis thaliana OX=3702 GN=PGSIP7 PE=3 SV=1	Carbohydrate transport and metabolism	Glucuronosyltransferase [Actinidia chinensis var. chinensis]		VaccDscaff5-augustus-gene-338.32	--	--	--	Protein of unknown function (DUF1218)	--	Function unknown	hypothetical protein C3L33_11931, partial [Rhododendron williamsianum]		VaccDscaff42-augustus-gene-34.23	Posttranslational modification, protein turnover, chaperones	K00799|2.1e-90|pavi:110765104|K00799 glutathione S-transferase [EC:2.5.1.18] | (RefSeq) glutathione S-transferase F11-like	Glutathione metabolism (ko00480)	Glutathione S-transferase, N-terminal domain	Glutathione S-transferase F12 OS=Arabidopsis thaliana OX=3702 GN=GSTF12 PE=1 SV=1	Posttranslational modification, protein turnover, chaperones	Glutathione S-transferase [Actinidia chinensis var. chinensis]
VaccDscaff14-processed-gene-336.20		K22133|2.2e-94|egr:104443802|K22133 oxalate---CoA ligase [EC:6.2.1.8] | (RefSeq) oxalate--CoA ligase	Glyoxylate and dicarboxylate metabolism (ko00630)	Legume lectin domain	L-type lectin-domain containing receptor kinase IX.1 OS=Arabidopsis thaliana OX=3702 GN=LECRK91 PE=1 SV=1	Signal transduction mechanisms	Legume lectin domain protein [Actinidia chinensis var. chinensis]		VaccDscaff28-processed-gene-334.5	Cell wall/membrane/envelope biogenesis	K13435|5.3e-103|spen:107018783|K13435 serine/threonine-protein kinase Pto | (RefSeq) receptor-like protein kinase HERK 1 isoform X2	Plant-pathogen interaction (ko04626)	Protein tyrosine and serine/threonine kinase	Probable receptor-like protein kinase At5g24010 OS=Arabidopsis thaliana OX=3702 GN=At5g24010 PE=1 SV=1	Signal transduction mechanisms	probable receptor-like protein kinase At5g24010 [Camellia sinensis]		VaccDscaff43-processed-gene-119.34	--	--	--	--	Interactor of constitutive active ROPs 3 OS=Arabidopsis thaliana OX=3702 GN=ICR3 PE=1 SV=1	Function unknown	hypothetical protein C3L33_04622, partial [Rhododendron williamsianum]
VaccDscaff2-snap-gene-10.34	--	K13065|5.0e-78|dcr:108213436|K13065 shikimate O-hydroxycinnamoyltransferase [EC:2.3.1.133] | (RefSeq) acetyl-CoA-benzylalcohol acetyltransferase-like	Phenylpropanoid biosynthesis (ko00940);; Flavonoid biosynthesis (ko00941);; Stilbenoid, diarylheptanoid and gingerol biosynthesis (ko00945)	Transferase family	Acetyl-CoA-benzylalcohol acetyltransferase OS=Clarkia breweri OX=36903 GN=BEAT PE=1 SV=1	Coenzyme transport and metabolism	hypothetical protein C3L33_08589, partial [Rhododendron williamsianum]		VaccDscaff39-augustus-gene-279.34	Cell motility	K10891|1.5e-189|tcc:18612304|K10891 fanconi anemia group D2 protein | (RefSeq) Fanconi anemia group D2 protein homolog	--	Cellulose synthase	Cellulose synthase-like protein H1 OS=Oryza sativa subsp. japonica OX=39947 GN=CSLH1 PE=2 SV=2	Carbohydrate transport and metabolism	cellulose synthase-like protein H1 isoform X1 [Camellia sinensis]		VaccDscaff33-processed-gene-103.9	--	--	--	--	--	--	dehydrin COR11 [Vaccinium corymbosum]
VaccDscaff8-augustus-gene-279.41	Carbohydrate transport and metabolism	K08193|1.1e-178|nsy:104249188|K08193 MFS transporter, ACS family, solute carrier family 17 (sodium-dependent inorganic phosphate cotransporter), other | (RefSeq) probable anion transporter 3, chloroplastic	--	Major Facilitator Superfamily	Probable anion transporter 3, chloroplastic OS=Arabidopsis thaliana OX=3702 GN=ANTR3 PE=2 SV=2	Carbohydrate transport and metabolism	probable anion transporter 3, chloroplastic [Camellia sinensis]		VaccDscaff2-augustus-gene-403.41	--	--	--	--	--	--	hypothetical protein C3L33_20987, partial [Rhododendron williamsianum]		VaccDscaff38-snap-gene-250.40	--	K00895|8.7e-53|hbr:110656716|K00895 diphosphate-dependent phosphofructokinase [EC:2.7.1.90] | (RefSeq) LOW QUALITY PROTEIN: uncharacterized protein LOC110656716	Glycolysis / Gluconeogenesis (ko00010);; Pentose phosphate pathway (ko00030);; Fructose and mannose metabolism (ko00051)	Ankyrin repeats (3 copies)	Putative cell wall protein OS=Arabidopsis thaliana OX=3702 GN=At2g20870 PE=2 SV=2	Function unknown	uncharacterized protein LOC114274049 isoform X1 [Camellia sinensis]
VaccDscaff15-augustus-gene-234.28	Signal transduction mechanisms	K13448|8.3e-47|tcc:18600205|K13448 calcium-binding protein CML | (RefSeq) calmodulin	Plant-pathogen interaction (ko04626)	EF hand	Calmodulin OS=Triticum aestivum OX=4565 PE=1 SV=3	Signal transduction mechanisms	calmodulin-like protein 11 isoform X1 [Camellia sinensis]		VaccDscaff33-augustus-gene-315.26	--	K19366|2.2e-56|rcu:8260656|K19366 spartin | (RefSeq) protein EARLY-RESPONSIVE TO DEHYDRATION 7, chloroplastic	Endocytosis (ko04144)	Senescence-associated protein	Senescence/dehydration-associated protein At3g51250 OS=Arabidopsis thaliana OX=3702 GN=At3g51250 PE=2 SV=1	Function unknown	Senescence/dehydration-associated protein [Actinidia chinensis var. chinensis]		VaccDscaff14-snap-gene-365.34	Lipid transport and metabolism	K01897|0.0e+00|vvi:100257137|K01897 long-chain acyl-CoA synthetase [EC:6.2.1.3] | (RefSeq) long chain acyl-CoA synthetase 2	Fatty acid biosynthesis (ko00061);; Fatty acid degradation (ko00071);; Fatty acid metabolism (ko01212);; Peroxisome (ko04146)	AMP-binding enzyme	Long chain acyl-CoA synthetase 2 OS=Arabidopsis thaliana OX=3702 GN=LACS2 PE=2 SV=1	Lipid transport and metabolism	Long chain acyl-CoA synthetase [Actinidia chinensis var. chinensis]
VaccDscaff41-processed-gene-55.2	--	K09422|2.1e-49|ccav:112500741|K09422 transcription factor MYB, plant | (RefSeq) transcription factor MYB73-like	--	Myb-like DNA-binding domain	Transcription factor MYB44 OS=Arabidopsis thaliana OX=3702 GN=MYB44 PE=1 SV=1	--	transcription factor MYB77-like [Camellia sinensis]		VaccDscaff21-augustus-gene-308.28	--	K13459|2.1e-08|hbr:110673008|K13459 disease resistance protein RPS2 | (RefSeq) probable disease resistance protein At5g63020	Plant-pathogen interaction (ko04626)	--	--	Replication, recombination and repair	hypothetical protein F0562_008148 [Nyssa sinensis]		VaccDscaff26-processed-gene-123.26	--	K00522|1.1e-24|rcu:8272083|K00522 ferritin heavy chain [EC:1.16.3.2] | (RefSeq) ferritin-3, chloroplastic	--	--	Ferritin-1, chloroplastic OS=Nicotiana tabacum OX=4097 GN=FER1 PE=2 SV=1	Inorganic ion transport and metabolism	ferritin-3, chloroplastic [Ricinus communis]
VaccDscaff5-processed-gene-416.2	--	K14494|7.0e-61|pop:18099385|K14494 DELLA protein | (RefSeq) DELLA protein GAI	Plant hormone signal transduction (ko04075)	GRAS domain family	Scarecrow-like transcription factor PAT1 OS=Arabidopsis thaliana OX=3702 GN=PAT1 PE=1 SV=1	Transcription	hypothetical protein C3L33_11537, partial [Rhododendron williamsianum]		VaccDscaff33-augustus-gene-120.21	Carbohydrate transport and metabolism	K01728|2.5e-207|sind:105174252|K01728 pectate lyase [EC:4.2.2.2] | (RefSeq) probable pectate lyase 12	Pentose and glucuronate interconversions (ko00040)	Pectate lyase	Probable pectate lyase 12 OS=Arabidopsis thaliana OX=3702 GN=At3g53190 PE=2 SV=2	Carbohydrate transport and metabolism	Pectate lyase [Actinidia chinensis var. chinensis]		VaccDscaff36-augustus-gene-189.26	--	K17616|4.5e-55|oeu:111404463|K17616 CTD small phosphatase-like protein 2 [EC:3.1.3.-] | (RefSeq) uncharacterized protein LOC111404463	--	Rubber elongation factor protein (REF)	REF/SRPP-like protein At1g67360 OS=Arabidopsis thaliana OX=3702 GN=At1g67360 PE=2 SV=1	Function unknown	hypothetical protein C3L33_13859, partial [Rhododendron williamsianum]
VaccDscaff160-snap-gene-1.36	Carbohydrate transport and metabolism	K14504|4.8e-132|vvi:100266747|K14504 xyloglucan:xyloglucosyl transferase TCH4 [EC:2.4.1.207] | (RefSeq) probable xyloglucan endotransglucosylase/hydrolase protein 23	Plant hormone signal transduction (ko04075)	Glycosyl hydrolases family 16	Probable xyloglucan endotransglucosylase/hydrolase protein 23 OS=Arabidopsis thaliana OX=3702 GN=XTH23 PE=2 SV=1	Carbohydrate transport and metabolism	xyloglucan endotransglucosylase/hydrolase protein 22-like [Gossypium australe]		VaccDscaff2-augustus-gene-295.41	--	K00993|2.8e-37|bna:106453259|K00993 ethanolaminephosphotransferase [EC:2.7.8.1] | (RefSeq) uncharacterized protein LOC106453259	Phosphonate and phosphinate metabolism (ko00440);; Glycerophospholipid metabolism (ko00564);; Ether lipid metabolism (ko00565)	Protein of unknown function (DUF1262)	--	Function unknown	Protein of unknown function DUF1262 protein [Actinidia chinensis var. chinensis]		VaccDscaff269-processed-gene-0.23	--	K15397|2.8e-91|vvi:100263120|K15397 3-ketoacyl-CoA synthase [EC:2.3.1.199] | (RefSeq) 3-ketoacyl-CoA synthase 2	Fatty acid elongation (ko00062);; Plant-pathogen interaction (ko04626)	FAE1/Type III polyketide synthase-like protein	3-ketoacyl-CoA synthase 20 OS=Arabidopsis thaliana OX=3702 GN=KCS20 PE=2 SV=1	Secondary metabolites biosynthesis, transport and catabolism	3-ketoacyl-CoA synthase 2-like [Camellia sinensis]
VaccDscaff11-augustus-gene-389.42	Carbohydrate transport and metabolism;; Lipid transport and metabolism	K01051|8.5e-230|hbr:110659276|K01051 pectinesterase [EC:3.1.1.11] | (RefSeq) probable pectinesterase/pectinesterase inhibitor 7	Pentose and glucuronate interconversions (ko00040)	Pectinesterase	Probable pectinesterase/pectinesterase inhibitor 7 OS=Arabidopsis thaliana OX=3702 GN=PME7 PE=2 SV=1	Carbohydrate transport and metabolism	hypothetical protein C3L33_07635, partial [Rhododendron williamsianum]		VaccDscaff29-snap-gene-346.28	--	K01870|9.2e-43|csat:104723377|K01870 isoleucyl-tRNA synthetase [EC:6.1.1.5] | (RefSeq) isoleucine--tRNA ligase, chloroplastic/mitochondrial-like	Aminoacyl-tRNA biosynthesis (ko00970)	Dirigent-like protein	Dirigent protein 21 OS=Arabidopsis thaliana OX=3702 GN=DIR21 PE=3 SV=1	Function unknown	hypothetical protein HYC85_009309 [Camellia sinensis]		VaccDscaff18-augustus-gene-108.31	--	--	--	Heavy-metal-associated domain	Heavy metal-associated isoprenylated plant protein 32 OS=Arabidopsis thaliana OX=3702 GN=HIPP32 PE=2 SV=1	Function unknown	hypothetical protein C3L33_09051, partial [Rhododendron williamsianum]
VaccDscaff6-processed-gene-7.8	--	K00521|9.8e-45|cmos:111447866|K00521 ferric-chelate reductase [EC:1.16.1.7] | (RefSeq) ferric reduction oxidase 7, chloroplastic-like	--	No apical meristem (NAM) protein	Transcription factor JUNGBRUNNEN 1 OS=Arabidopsis thaliana OX=3702 GN=JUB1 PE=1 SV=1	Transcription	hypothetical protein C3L33_09666, partial [Rhododendron williamsianum]		VaccDscaff10-snap-gene-204.28	Carbohydrate transport and metabolism	K00700|0.0e+00|qsu:112009742|K00700 1,4-alpha-glucan branching enzyme [EC:2.4.1.18] | (RefSeq) 1,4-alpha-glucan-branching enzyme 2-2, chloroplastic/amyloplastic-like isoform X1	Starch and sucrose metabolism (ko00500)	Carbohydrate-binding module 48 (Isoamylase N-terminal domain)	1,4-alpha-glucan-branching enzyme 1, chloroplastic/amyloplastic OS=Pisum sativum OX=3888 GN=SBEI PE=1 SV=1	Carbohydrate transport and metabolism	1,4-alpha-glucan-branching enzyme 1/amyloplastic like [Actinidia chinensis var. chinensis]		VaccDscaff4-augustus-gene-415.32	Lipid transport and metabolism;; General function prediction only	K15403|5.5e-264|nta:107810756|K15403 fatty acid omega-hydroxy dehydrogenase [EC:1.1.-.-] | (RefSeq) protein HOTHEAD-like	Cutin, suberine and wax biosynthesis (ko00073)	GMC oxidoreductase	Protein HOTHEAD OS=Arabidopsis thaliana OX=3702 GN=HTH PE=1 SV=1	Amino acid transport and metabolism	hypothetical protein C3L33_14695, partial [Rhododendron williamsianum]
VaccDscaff14-augustus-gene-182.18	--	--	--	--	--	Function unknown	hypothetical protein C3L33_13220, partial [Rhododendron williamsianum]		VaccDscaff11-augustus-gene-379.23	--	--	--	--	Uncharacterized GPI-anchored protein At5g19250 OS=Arabidopsis thaliana OX=3702 GN=At5g19250 PE=2 SV=1	Function unknown	hypothetical protein HYC85_031252 [Camellia sinensis]		VaccDscaff40-augustus-gene-193.27	Lipid transport and metabolism;; General function prediction only	K01206|7.4e-76|thj:104825554|K01206 alpha-L-fucosidase [EC:3.2.1.51] | (RefSeq) alpha-L-fucosidase 3	Other glycan degradation (ko00511)	GDSL-like Lipase/Acylhydrolase	GDSL esterase/lipase At4g01130 OS=Arabidopsis thaliana OX=3702 GN=At4g01130 PE=2 SV=1	Function unknown	hypothetical protein C3L33_04989, partial [Rhododendron williamsianum]
VaccDscaff30-augustus-gene-170.15	--	--	--	COBRA-like protein	COBRA-like protein 1 OS=Oryza sativa subsp. japonica OX=39947 GN=BC1L6 PE=2 SV=1	Function unknown	hypothetical protein C3L33_00937, partial [Rhododendron williamsianum]		VaccDscaff1482-augustus-gene-0.3	--	--	--	Glycosyl transferase family 90	--	Function unknown	O-glucosyltransferase rumi-like isoform X1 [Camellia sinensis]		VaccDscaff21-snap-gene-201.31	--	K14165|3.4e-15|cme:CYME_CMT465C|K14165 atypical dual specificity phosphatase [EC:3.1.3.16 3.1.3.48] | (RefSeq) similar to dual-specificity phosphatase laforin	--	Glycogen recognition site of AMP-activated protein kinase	Phosphoglucan phosphatase DSP4, amyloplastic OS=Castanea sativa OX=21020 GN=DSP4 PE=1 SV=1	Signal transduction mechanisms	Phosphoglucan phosphatase DSP4 [Actinidia chinensis var. chinensis]
VaccDscaff377-augustus-gene-0.29	Energy production and conversion	K00366|1.5e-290|sind:105169542|K00366 ferredoxin-nitrite reductase [EC:1.7.7.1] | (RefSeq) ferredoxin--nitrite reductase, chloroplastic	Nitrogen metabolism (ko00910)	Nitrite and sulphite reductase 4Fe-4S domain	Ferredoxin--nitrite reductase, chloroplastic OS=Betula pendula OX=3505 GN=NIR1 PE=2 SV=1	Inorganic ion transport and metabolism	Ferredoxin--nitrite reductase [Actinidia chinensis var. chinensis]		VaccDscaff46-augustus-gene-24.18	--	K08176|8.0e-31|bvg:104892046|K08176 MFS transporter, PHS family, inorganic phosphate transporter | (RefSeq) probable inorganic phosphate transporter 1-4	--	Plant protein of unknown function (DUF863)	--	Function unknown	hypothetical protein C3L33_08663, partial [Rhododendron williamsianum]		VaccDscaff26-snap-gene-362.40	--	--	--	--	Photosynthetic NDH subunit of subcomplex B 2, chloroplastic OS=Arabidopsis thaliana OX=3702 GN=PNSB2 PE=2 SV=1	Function unknown	hypothetical protein C3L33_02147, partial [Rhododendron williamsianum]
VaccDscaff21-processed-gene-378.12	General function prediction only	--	--	von Willebrand factor type A domain	E3 ubiquitin-protein ligase WAV3 OS=Arabidopsis thaliana OX=3702 GN=WAV3 PE=1 SV=1	Function unknown	hypothetical protein HYC85_006347 [Camellia sinensis]		VaccDscaff20-augustus-gene-66.39	Carbohydrate transport and metabolism	K09872|3.5e-147|pper:18785293|K09872 aquaporin PIP | (RefSeq) probable aquaporin PIP2-5	--	Major intrinsic protein	Probable aquaporin PIP2-5 OS=Arabidopsis thaliana OX=3702 GN=PIP2-5 PE=1 SV=1	Carbohydrate transport and metabolism	hypothetical protein C1H46_039718 [Malus baccata]		VaccDscaff14-snap-gene-219.30	--	--	--	Neprosin	--	Function unknown	uncharacterized protein LOC114267298 isoform X2 [Camellia sinensis]
VaccDscaff28-augustus-gene-295.43	Function unknown	K03260|2.4e-09|pda:103710480|K03260 translation initiation factor 4G | (RefSeq) eukaryotic translation initiation factor-like	RNA transport (ko03013)	Proteolipid membrane potential modulator	Hydrophobic protein RCI2A OS=Arabidopsis thaliana OX=3702 GN=RCI2A PE=2 SV=1	Function unknown	low temperature-induced protein lt101.2 [Momordica charantia]		VaccDscaff38-processed-gene-246.10	--	--	--	--	--	--	hypothetical protein C3L33_10349, partial [Rhododendron williamsianum]		VaccDscaff17-augustus-gene-84.31	--	--	--	--	Interactor of constitutive active ROPs 2, chloroplastic OS=Arabidopsis thaliana OX=3702 GN=ICR2 PE=1 SV=1	Function unknown	hypothetical protein C3L33_20194, partial [Rhododendron williamsianum]
VaccDscaff37-snap-gene-224.34	Cell cycle control, cell division, chromosome partitioning;; Inorganic ion transport and metabolism;; Cell wall/membrane/envelope biogenesis	K00423|7.3e-177|mus:103969432|K00423 L-ascorbate oxidase [EC:1.10.3.3] | (RefSeq) L-ascorbate oxidase	Ascorbate and aldarate metabolism (ko00053)	Multicopper oxidase	L-ascorbate oxidase OS=Cucumis sativus OX=3659 PE=1 SV=1	Secondary metabolites biosynthesis, transport and catabolism	L-ascorbate oxidase-like [Camellia sinensis]		VaccDscaff38-snap-gene-70.29	--	--	--	Serine hydrolase (FSH1)	Rhodanese-like domain-containing protein 6 OS=Arabidopsis thaliana OX=3702 GN=STR6 PE=2 SV=1	Amino acid transport and metabolism	PREDICTED: uncharacterized protein LOC108224120 isoform X1 [Daucus carota subsp. sativus]		VaccDscaff39-processed-gene-4.8	--	K13128|5.0e-08|smo:SELMODRAFT_444691|K13128 zinc finger CCHC domain-containing protein 8 | (RefSeq) hypothetical protein	--	--	Protein GLUTAMINE DUMPER 3 OS=Arabidopsis thaliana OX=3702 GN=GDU3 PE=1 SV=1	Intracellular trafficking, secretion, and vesicular transport	hypothetical protein C3L33_05615, partial [Rhododendron williamsianum]
VaccDscaff7-snap-gene-384.35	--	K17500|1.3e-44|nto:104085001|K17500 integrin-linked kinase-associated serine/threonine phosphatase 2C [EC:3.1.3.16] | (RefSeq) WAT1-related protein At3g18200 isoform X1	--	EamA-like transporter family	WAT1-related protein At3g28050 OS=Arabidopsis thaliana OX=3702 GN=At3g28050 PE=2 SV=1	Function unknown	hypothetical protein DVH24_031804 [Malus domestica]		VaccDscaff7-augustus-gene-177.33	--	K15718|6.4e-199|zju:107412008|K15718 linoleate 9S-lipoxygenase [EC:1.13.11.58] | (RefSeq) probable linoleate 9S-lipoxygenase 5	Linoleic acid metabolism (ko00591)	Lipoxygenase	Probable linoleate 9S-lipoxygenase 5 OS=Solanum tuberosum OX=4113 GN=LOX1.5 PE=2 SV=1	Amino acid transport and metabolism	probable linoleate 9S-lipoxygenase 5 [Camellia sinensis]		VaccDscaff22-processed-gene-283.7	--	K14491|6.8e-22|thj:104823648|K14491 two-component response regulator ARR-B family | (RefSeq) two-component response regulator ARR14 isoform X1	Plant hormone signal transduction (ko04075)	Myb-like DNA-binding domain	Transcription factor LUX OS=Arabidopsis thaliana OX=3702 GN=LUX PE=1 SV=1	Transcription	hypothetical protein C3L33_04536, partial [Rhododendron williamsianum]
VaccDscaff32-snap-gene-67.25	Translation, ribosomal structure and biogenesis	K01872|0.0e+00|vvi:100255425|K01872 alanyl-tRNA synthetase [EC:6.1.1.7] | (RefSeq) alanine--tRNA ligase, chloroplastic/mitochondrial	Aminoacyl-tRNA biosynthesis (ko00970)	tRNA synthetases class II (A)	Alanine--tRNA ligase, chloroplastic/mitochondrial OS=Populus trichocarpa OX=3694 GN=POPTRDRAFT_821063 PE=3 SV=1	Translation, ribosomal structure and biogenesis	hypothetical protein C3L33_19465, partial [Rhododendron williamsianum]		VaccDscaff60-augustus-gene-8.41	--	K07964|9.8e-234|vvi:100255842|K07964 heparanase [EC:3.2.1.166] | (RefSeq) heparanase-like protein 3	Glycosaminoglycan degradation (ko00531)	Glycosyl hydrolase family 79, N-terminal domain	Heparanase-like protein 3 OS=Arabidopsis thaliana OX=3702 GN=At5g34940 PE=2 SV=2	Function unknown	heparanase-like protein 3 [Camellia sinensis]		VaccDscaff21-augustus-gene-46.30	Defense mechanisms	K05666|0.0e+00|qsu:112020205|K05666 ATP-binding cassette, subfamily C (CFTR/MRP), member 2 | (RefSeq) ABC transporter C family member 10-like	ABC transporters (ko02010)	ABC transporter	ABC transporter C family member 10 OS=Arabidopsis thaliana OX=3702 GN=ABCC10 PE=2 SV=2	Defense mechanisms	hypothetical protein C3L33_03302, partial [Rhododendron williamsianum]
VaccDscaff31-augustus-gene-329.24	Posttranslational modification, protein turnover, chaperones	K00799|1.4e-103|cpap:110818254|K00799 glutathione S-transferase [EC:2.5.1.18] | (RefSeq) glutathione S-transferase-like	Glutathione metabolism (ko00480)	Glutathione S-transferase, N-terminal domain	Glutathione S-transferase F11 OS=Arabidopsis thaliana OX=3702 GN=GSTF11 PE=2 SV=1	Posttranslational modification, protein turnover, chaperones	hypothetical protein F0562_026856 [Nyssa sinensis]		VaccDscaff5-processed-gene-366.10	--	K14494|1.5e-63|hbr:110671412|K14494 DELLA protein | (RefSeq) DELLA protein GAI	Plant hormone signal transduction (ko04075)	GRAS domain family	Scarecrow-like transcription factor PAT1 OS=Arabidopsis thaliana OX=3702 GN=PAT1 PE=1 SV=1	Transcription	hypothetical protein C3L33_11794, partial [Rhododendron williamsianum]		VaccDscaff34-augustus-gene-306.22	Signal transduction mechanisms	--	--	alpha/beta hydrolase fold	--	Function unknown	hypothetical protein C3L33_20193, partial [Rhododendron williamsianum]
VaccDscaff40-processed-gene-78.4	--	K00020|5.0e-22|mtr:MTR_8g088900|K00020 3-hydroxyisobutyrate dehydrogenase [EC:1.1.1.31] | (RefSeq) 6-phosphogluconate dehydrogenase-like protein	Valine, leucine and isoleucine degradation (ko00280)	Phosphate-induced protein 1 conserved region	Protein PHOSPHATE-INDUCED 1 OS=Nicotiana tabacum OX=4097 GN=PHI-1 PE=2 SV=1	Replication, recombination and repair	hypothetical protein C3L33_10694, partial [Rhododendron williamsianum]		VaccDscaff10-processed-gene-373.9	--	--	--	--	--	--	hypothetical protein C3L33_20027, partial [Rhododendron williamsianum]		VaccDscaff13-augustus-gene-95.36	Amino acid transport and metabolism	K00318|3.7e-184|vvi:100254983|K00318 proline dehydrogenase [EC:1.5.5.2] | (RefSeq) proline dehydrogenase 2, mitochondrial	Arginine and proline metabolism (ko00330)	Proline dehydrogenase	Proline dehydrogenase 1, mitochondrial OS=Arabidopsis thaliana OX=3702 GN=POX1 PE=1 SV=2	Amino acid transport and metabolism	hypothetical protein C3L33_01410, partial [Rhododendron williamsianum]
VaccDscaff39-snap-gene-210.39	Carbohydrate transport and metabolism	K14504|7.1e-103|vvi:100261619|K14504 xyloglucan:xyloglucosyl transferase TCH4 [EC:2.4.1.207] | (RefSeq) probable xyloglucan endotransglucosylase/hydrolase protein 23	Plant hormone signal transduction (ko04075)	Glycosyl hydrolases family 16	Xyloglucan endotransglucosylase/hydrolase protein 22 OS=Arabidopsis thaliana OX=3702 GN=XTH22 PE=1 SV=1	Carbohydrate transport and metabolism	xyloglucan endotransglucosylase/hydrolase 7 [Actinidia deliciosa]		VaccDscaff701-augustus-gene-0.11	--	K13944|4.6e-33|pxb:103957286|K13944 LOB domain-containing protein 16 | (RefSeq) LOB domain-containing protein 16	--	Lateral organ boundaries (LOB) domain	LOB domain-containing protein 4 OS=Arabidopsis thaliana OX=3702 GN=LBD4 PE=1 SV=1	Function unknown	hypothetical protein C3L33_09663, partial [Rhododendron williamsianum]		VaccDscaff4-augustus-gene-328.35	Cell cycle control, cell division, chromosome partitioning	K07375|2.3e-246|pop:7464075|K07375 tubulin beta | (RefSeq) tubulin beta-5 chain	Phagosome (ko04145)	Tubulin/FtsZ family, GTPase domain	Tubulin beta-4 chain OS=Oryza sativa subsp. japonica OX=39947 GN=TUBB4 PE=2 SV=1	Cytoskeleton	tubulin beta-5 chain-like [Populus alba]
VaccDscaff6-processed-gene-116.5	--	--	--	Wound-induced protein	--	Function unknown	hypothetical protein C3L33_10345, partial [Rhododendron williamsianum]		VaccDscaff11-snap-gene-396.31	--	K24194|0.0e+00|vvi:100247044|K24194 boron transporter | (RefSeq) probable boron transporter 2	--	HCO3- transporter family	Boron transporter 1 OS=Arabidopsis thaliana OX=3702 GN=BOR1 PE=1 SV=1	Inorganic ion transport and metabolism	Boron transporter like [Actinidia chinensis var. chinensis]		VaccDscaff7-snap-gene-43.34	--	K17500|3.9e-112|nto:104085001|K17500 integrin-linked kinase-associated serine/threonine phosphatase 2C [EC:3.1.3.16] | (RefSeq) WAT1-related protein At3g18200 isoform X1	--	EamA-like transporter family	Protein WALLS ARE THIN 1 OS=Arabidopsis thaliana OX=3702 GN=WAT1 PE=1 SV=1	Function unknown	Protein WALLS ARE THIN like [Actinidia chinensis var. chinensis]
VaccDscaff37-processed-gene-61.4	--	K03676|1.6e-37|rcu:8288062|K03676 glutaredoxin 3 | (RefSeq) glutaredoxin-C9	--	Glutaredoxin	Glutaredoxin-C9 OS=Arabidopsis thaliana OX=3702 GN=GRXC9 PE=1 SV=1	Posttranslational modification, protein turnover, chaperones	Glutaredoxin-C9 like [Actinidia chinensis var. chinensis]		VaccDscaff42-augustus-gene-92.25	--	K01110|4.7e-56|tcc:18601599|K01110 phosphatidylinositol-3,4,5-trisphosphate 3-phosphatase and dual-specificity protein phosphatase PTEN [EC:3.1.3.16 3.1.3.48 3.1.3.67] | (RefSeq) phosphatidylinositol 3,4,5-trisphosphate 3-phosphatase and protein-tyrosine-phosphatase PTEN1	Inositol phosphate metabolism (ko00562);; Phosphatidylinositol signaling system (ko04070)	C2 domain of PTEN tumour-suppressor protein	Phosphatidylinositol 3,4,5-trisphosphate 3-phosphatase and protein-tyrosine-phosphatase PTEN1 OS=Arabidopsis thaliana OX=3702 GN=PTEN1 PE=1 SV=1	Signal transduction mechanisms	hypothetical protein C3L33_01487, partial [Rhododendron williamsianum]		VaccDscaff11-snap-gene-149.23	--	K10691|3.9e-69|ats:109762802|K10691 E3 ubiquitin-protein ligase UBR4 [EC:2.3.2.27] | (RefSeq) LOC109762802; auxin transport protein BIG	--	GDSL-like Lipase/Acylhydrolase	GDSL esterase/lipase At5g45950 OS=Arabidopsis thaliana OX=3702 GN=At5g45950 PE=2 SV=1	Function unknown	GDSL esterase/lipase [Actinidia chinensis var. chinensis]
VaccDscaff41-augustus-gene-161.27	--	--	--	Plastocyanin-like domain	Uclacyanin 1 OS=Arabidopsis thaliana OX=3702 GN=UCC1 PE=1 SV=1	Function unknown	hypothetical protein C3L33_23429, partial [Rhododendron williamsianum]		VaccDscaff4-snap-gene-160.25	--	--	--	Leucine Rich repeats (2 copies)	--	Function unknown	uncharacterized protein LOC114318819 [Camellia sinensis]		VaccDscaff43-augustus-gene-118.32	Secondary metabolites biosynthesis, transport and catabolism;; Defense mechanisms	K17961|2.0e-145|lsv:111885523|K17961 trimethyltridecatetraene/dimethylnonatriene synthase [EC:1.14.14.58 1.14.14.59] | (RefSeq) cytochrome P450 82C2-like	Diterpenoid biosynthesis (ko00904)	Cytochrome P450	Xanthotoxin 5-hydroxylase CYP82C4 OS=Arabidopsis thaliana OX=3702 GN=CYP82C4 PE=1 SV=1	Secondary metabolites biosynthesis, transport and catabolism	hypothetical protein C3L33_04606, partial [Rhododendron williamsianum]
VaccDscaff7-augustus-gene-383.28	Cell motility	K20887|3.7e-296|mesc:110604516|K20887 xyloglucan glycosyltransferase 4 [EC:2.4.1.-] | (RefSeq) xyloglucan glycosyltransferase 4-like	--	Glycosyl transferase family group 2	Xyloglucan glycosyltransferase 4 OS=Arabidopsis thaliana OX=3702 GN=CSLC4 PE=1 SV=1	Cell wall/membrane/envelope biogenesis	hypothetical protein C3L33_18928, partial [Rhododendron williamsianum]		VaccDscaff37-augustus-gene-35.39	Carbohydrate transport and metabolism	K08235|2.2e-147|sind:105178525|K08235 xyloglucan:xyloglucosyl transferase [EC:2.4.1.207] | (RefSeq) xyloglucan endotransglucosylase/hydrolase protein 9	--	Glycosyl hydrolases family 16	Xyloglucan endotransglucosylase/hydrolase protein 9 OS=Arabidopsis thaliana OX=3702 GN=XTH9 PE=2 SV=2	Carbohydrate transport and metabolism	hypothetical protein C3L33_10328, partial [Rhododendron williamsianum]		VaccDscaff17-processed-gene-238.3	--	K09286|1.5e-24|bna:106379385|K09286 EREBP-like factor | (RefSeq) ethylene-responsive transcription factor ERF071-like	--	AP2 domain	Ethylene-responsive transcription factor ERF109 OS=Arabidopsis thaliana OX=3702 GN=ERF109 PE=1 SV=1	Transcription	hypothetical protein C3L33_19606, partial [Rhododendron williamsianum]
VaccDscaff40-processed-gene-164.20	--	--	--	--	--	--	hypothetical protein C3L33_16745, partial [Rhododendron williamsianum]		VaccDscaff20-augustus-gene-353.15	Secondary metabolites biosynthesis, transport and catabolism	K01179|7.7e-282|jcu:105645679|K01179 endoglucanase [EC:3.2.1.4] | (RefSeq) endoglucanase 6	Starch and sucrose metabolism (ko00500)	Glycosyl hydrolase family 9	Endoglucanase 6 OS=Arabidopsis thaliana OX=3702 GN=At1g64390 PE=2 SV=2	Carbohydrate transport and metabolism	hypothetical protein HYC85_026548 [Camellia sinensis]		VaccDscaff27-augustus-gene-344.21	--	K13464|4.4e-28|nnu:104609287|K13464 jasmonate ZIM domain-containing protein | (RefSeq) protein TIFY 10a-like	Plant hormone signal transduction (ko04075)	tify domain	Protein TIFY 10A OS=Arabidopsis thaliana OX=3702 GN=TIFY10A PE=1 SV=1	Function unknown	hypothetical protein C3L33_00104, partial [Rhododendron williamsianum]
VaccDscaff23-processed-gene-307.24	--	--	--	D-mannose binding lectin	G-type lectin S-receptor-like serine/threonine-protein kinase At5g24080 OS=Arabidopsis thaliana OX=3702 GN=At5g24080 PE=2 SV=1	Signal transduction mechanisms	hypothetical protein C3L33_11419, partial [Rhododendron williamsianum]		VaccDscaff3-snap-gene-265.24	Carbohydrate transport and metabolism	K00083|4.0e-158|vvi:100244482|K00083 cinnamyl-alcohol dehydrogenase [EC:1.1.1.195] | (RefSeq) probable cinnamyl alcohol dehydrogenase 1	Phenylpropanoid biosynthesis (ko00940)	Alcohol dehydrogenase GroES-like domain	Probable cinnamyl alcohol dehydrogenase 1 OS=Arabidopsis thaliana OX=3702 GN=CAD1 PE=2 SV=1	Secondary metabolites biosynthesis, transport and catabolism	unnamed protein product, partial [Vitis vinifera]		VaccDscaff4-snap-gene-266.15	--	K16732|3.2e-254|vvi:100264256|K16732 protein regulator of cytokinesis 1 | (RefSeq) 65-kDa microtubule-associated protein 8	--	Microtubule associated protein (MAP65/ASE1 family)	65-kDa microtubule-associated protein 8 OS=Arabidopsis thaliana OX=3702 GN=MAP65-8 PE=1 SV=2	Function unknown	Microtubule-associated protein [Actinidia chinensis var. chinensis]
VaccDscaff5-snap-gene-42.39	--	K00430|4.6e-131|sot:102592830|K00430 peroxidase [EC:1.11.1.7] | (RefSeq) peroxidase 39-like	Phenylpropanoid biosynthesis (ko00940)	Peroxidase	Peroxidase 3 OS=Arabidopsis thaliana OX=3702 GN=PER3 PE=2 SV=1	Secondary metabolites biosynthesis, transport and catabolism	uncharacterized protein LOC115949739 [Quercus lobata]		VaccDscaff2-processed-gene-188.12	--	K09286|1.1e-20|rcu:8275655|K09286 EREBP-like factor | (RefSeq) ethylene-responsive transcription factor TINY	--	AP2 domain	Ethylene-responsive transcription factor ERF012 OS=Arabidopsis thaliana OX=3702 GN=ERF012 PE=2 SV=1	Transcription	hypothetical protein C3L33_21639, partial [Rhododendron williamsianum]		VaccDscaff3-snap-gene-108.43	--	--	--	Protein of unknown function (DUF1218)	--	Function unknown	Branched-chain amino acid transport system carrier protein [Actinidia chinensis var. chinensis]
VaccDscaff22-snap-gene-117.33	--	--	--	Domain of unknown function (DUF4378)	--	Function unknown	hypothetical protein C3L33_08548, partial [Rhododendron williamsianum]		VaccDscaff47-augustus-gene-191.30	Cell motility	K00770|0.0e+00|oeu:111394168|K00770 1,4-beta-D-xylan synthase [EC:2.4.2.24] | (RefSeq) cellulose synthase-like protein D5	Amino sugar and nucleotide sugar metabolism (ko00520)	Cellulose synthase	Cellulose synthase-like protein D5 OS=Arabidopsis thaliana OX=3702 GN=CSLD5 PE=2 SV=1	Carbohydrate transport and metabolism	hypothetical protein C3L33_03996, partial [Rhododendron williamsianum]		VaccDscaff35-snap-gene-263.43	Signal transduction mechanisms	K12127|3.1e-194|vvi:100258790|K12127 pseudo-response regulator 1 | (RefSeq) two-component response regulator-like APRR1	Circadian rhythm - plant (ko04712)	Response regulator receiver domain	Two-component response regulator-like APRR1 OS=Arabidopsis thaliana OX=3702 GN=APRR1 PE=1 SV=1	Transcription	CCT motif -containing response regulator protein [Striga asiatica]
VaccDscaff20-processed-gene-57.10	--	--	--	C2H2-type zinc finger	Zinc finger protein ZAT12 OS=Arabidopsis thaliana OX=3702 GN=ZAT12 PE=2 SV=1	Function unknown	PREDICTED: zinc finger protein ZAT11-like [Nicotiana tabacum]		VaccDscaff2-augustus-gene-269.40	Posttranslational modification, protein turnover, chaperones	K00799|1.7e-83|pop:18102327|K00799 glutathione S-transferase [EC:2.5.1.18] | (RefSeq) glutathione S-transferase U17	Glutathione metabolism (ko00480)	Glutathione S-transferase, N-terminal domain	Glutathione S-transferase U17 OS=Arabidopsis thaliana OX=3702 GN=GSTU17 PE=2 SV=1	Posttranslational modification, protein turnover, chaperones	hypothetical protein C3L33_13522, partial [Rhododendron williamsianum]		VaccDscaff11-augustus-gene-341.37	--	--	--	--	--	Function unknown	uncharacterized protein LOC114297344 isoform X1 [Camellia sinensis]
VaccDscaff44-processed-gene-234.6	--	--	--	Cotton fibre expressed protein	--	Function unknown	hypothetical protein L484_016698 [Morus notabilis]		VaccDscaff36-snap-gene-225.36	Carbohydrate transport and metabolism	K13692|7.1e-114|bna:106360634|K13692 UDP-glucose:(indol-3-yl)acetate beta-D-glucosyltransferase [EC:2.4.1.121] | (RefSeq) UDP-glycosyltransferase 75D1-like	--	UDP-glucoronosyl and UDP-glucosyl transferase	Crocetin glucosyltransferase, chloroplastic OS=Gardenia jasminoides OX=114476 GN=UGT75L6 PE=1 SV=1	--	hypothetical protein F0562_035244 [Nyssa sinensis]		VaccDscaff46-augustus-gene-107.34	--	--	--	--	--	Function unknown	Kelch repeat and BTB domain-containing protein [Actinidia chinensis var. chinensis]
VaccDscaff31-processed-gene-9.7	Carbohydrate transport and metabolism	K01809|3.2e-131|jcu:105638738|K01809 mannose-6-phosphate isomerase [EC:5.3.1.8] | (RefSeq) mannose-6-phosphate isomerase 1	Fructose and mannose metabolism (ko00051);; Amino sugar and nucleotide sugar metabolism (ko00520)	Phosphomannose isomerase type I	Mannose-6-phosphate isomerase 1 OS=Arabidopsis thaliana OX=3702 GN=PMI1 PE=1 SV=1	Carbohydrate transport and metabolism	hypothetical protein C3L33_18646, partial [Rhododendron williamsianum]		VaccDscaff51-augustus-gene-16.30	--	--	--	NPH3 family	BTB/POZ domain-containing protein At1g03010 OS=Arabidopsis thaliana OX=3702 GN=At1g03010 PE=2 SV=1	Function unknown	BTB/POZ domain-containing protein [Actinidia chinensis var. chinensis]		VaccDscaff33-augustus-gene-325.26	--	K19366|3.4e-57|rcu:8260656|K19366 spartin | (RefSeq) protein EARLY-RESPONSIVE TO DEHYDRATION 7, chloroplastic	Endocytosis (ko04144)	Senescence-associated protein	Senescence/dehydration-associated protein At4g35985, chloroplastic OS=Arabidopsis thaliana OX=3702 GN=P85 PE=2 SV=1	Function unknown	Senescence/dehydration-associated protein [Actinidia chinensis var. chinensis]
VaccDscaff12-processed-gene-327.26	--	--	--	Leucine rich repeat	Leucine-rich repeat extensin-like protein 2 OS=Arabidopsis thaliana OX=3702 GN=LRX2 PE=1 SV=1	Function unknown	hypothetical protein C3L33_05254, partial [Rhododendron williamsianum]		VaccDscaff19-processed-gene-104.8	Posttranslational modification, protein turnover, chaperones;; Signal transduction mechanisms	--	--	ACT domain	ACT domain-containing protein ACR4 OS=Arabidopsis thaliana OX=3702 GN=ACR4 PE=2 SV=1	Function unknown	hypothetical protein C3L33_16965, partial [Rhododendron williamsianum]		VaccDscaff239-snap-gene-0.62	--	K13946|3.3e-254|cic:CICLE_v10028271mg|K13946 auxin influx carrier (AUX1 LAX family) | (RefSeq) hypothetical protein	Plant hormone signal transduction (ko04075)	Transmembrane amino acid transporter protein	Auxin transporter-like protein 5 OS=Medicago truncatula OX=3880 GN=LAX5 PE=2 SV=1	Amino acid transport and metabolism	hypothetical protein C3L33_20729, partial [Rhododendron williamsianum]
VaccDscaff29-processed-gene-55.3	--	K19747|1.2e-38|vvi:100243942|K19747 BAHD acyltransferase [EC:2.3.1.-] | (RefSeq) BAHD acyltransferase DCR	--	C2 domain	--	Function unknown	hypothetical protein C3L33_16416, partial [Rhododendron williamsianum]		VaccDscaff15-processed-gene-2.24	--	--	--	--	--	--	hypothetical protein VIGAN_UM157300, partial [Vigna angularis var. angularis]		VaccDscaff20-processed-gene-376.2	--	--	--	--	--	Function unknown	hypothetical protein C3L33_16180, partial [Rhododendron williamsianum]
VaccDscaff16-processed-gene-316.11	Amino acid transport and metabolism;; General function prediction only	K00457|7.1e-193|tcc:18612224|K00457 4-hydroxyphenylpyruvate dioxygenase [EC:1.13.11.27] | (RefSeq) 4-hydroxyphenylpyruvate dioxygenase	Ubiquinone and other terpenoid-quinone biosynthesis (ko00130);; Tyrosine metabolism (ko00350);; Phenylalanine metabolism (ko00360)	Glyoxalase/Bleomycin resistance protein/Dioxygenase superfamily	4-hydroxyphenylpyruvate dioxygenase OS=Arabidopsis thaliana OX=3702 GN=HPD PE=1 SV=2	Amino acid transport and metabolism	4-hydroxyphenylpyruvate dioxygenase [Actinidia chinensis var. chinensis]		VaccDscaff44-augustus-gene-197.25	--	K10752|3.5e-34|zju:107427343|K10752 histone-binding protein RBBP4 | (RefSeq) LOW QUALITY PROTEIN: WD-40 repeat-containing protein MSI3	--	Heavy-metal-associated domain	Heavy metal-associated isoprenylated plant protein 20 OS=Arabidopsis thaliana OX=3702 GN=HIPP20 PE=1 SV=1	Inorganic ion transport and metabolism	Heavy metal-associated isoprenylated plant protein [Actinidia chinensis var. chinensis]		VaccDscaff37-augustus-gene-75.26	--	K22746|6.2e-93|vvi:100263292|K22746 anamorsin | (RefSeq) anamorsin homolog	--	Cytokine-induced anti-apoptosis inhibitor 1, Fe-S biogenesis	Anamorsin homolog OS=Vitis vinifera OX=29760 GN=VIT_01s0010g01180 PE=3 SV=1	Function unknown	hypothetical protein C3L33_10559, partial [Rhododendron williamsianum]
VaccDscaff12-processed-gene-296.10	--	--	--	Late embryogenesis abundant protein	--	Function unknown	Late embryogenesis abundant protein [Actinidia chinensis var. chinensis]		VaccDscaff3-processed-gene-6.28	Secondary metabolites biosynthesis, transport and catabolism	--	--	--	--	Secondary metabolites biosynthesis, transport and catabolism	Protein DMR6-LIKE OXYGENASE 2 like [Actinidia chinensis var. chinensis]		VaccDscaff47-augustus-gene-146.38	--	--	--	NPH3 family	BTB/POZ domain-containing protein At5g48800 OS=Arabidopsis thaliana OX=3702 GN=At5g48800 PE=2 SV=1	Function unknown	hypothetical protein C3L33_04323, partial [Rhododendron williamsianum]
VaccDscaff35-snap-gene-199.22		K13415|1.9e-70|ini:109185793|K13415 protein brassinosteroid insensitive 1 [EC:2.7.10.1 2.7.11.1] | (RefSeq) systemin receptor SR160-like	Plant hormone signal transduction (ko04075)	Protein tyrosine and serine/threonine kinase	Cysteine-rich receptor-like protein kinase 2 OS=Arabidopsis thaliana OX=3702 GN=CRK2 PE=1 SV=1	Signal transduction mechanisms	uncharacterized protein LOC111492443 [Cucurbita maxima]		VaccDscaff14-snap-gene-190.26	--	--	--	Hydrophobic seed protein	36.4 kDa proline-rich protein OS=Solanum lycopersicum OX=4081 GN=TPRP-F1 PE=2 SV=1	Function unknown	hypothetical protein FH972_025837 [Carpinus fangiana]		VaccDscaff8-augustus-gene-78.30	Lipid transport and metabolism;; General function prediction only	K10691|7.5e-83|ats:109762802|K10691 E3 ubiquitin-protein ligase UBR4 [EC:2.3.2.27] | (RefSeq) LOC109762802; auxin transport protein BIG	--	GDSL-like Lipase/Acylhydrolase	GDSL esterase/lipase At2g04570 OS=Arabidopsis thaliana OX=3702 GN=At2g04570 PE=2 SV=1	Function unknown	GDSL esterase/lipase [Actinidia chinensis var. chinensis]
VaccDscaff2-augustus-gene-58.13	--	K13448|1.3e-61|sly:101244797|K13448 calcium-binding protein CML | (RefSeq) probable calcium-binding protein CML18	Plant-pathogen interaction (ko04626)	EF-hand domain pair	Probable calcium-binding protein CML18 OS=Arabidopsis thaliana OX=3702 GN=CML18 PE=1 SV=1	Signal transduction mechanisms	hypothetical protein C3L33_21886, partial [Rhododendron williamsianum]		VaccDscaff38-augustus-gene-290.20	--	K03231|3.9e-23|mtr:MTR_8g008740|K03231 elongation factor 1-alpha | (RefSeq) elongation factor 1-alpha	RNA transport (ko03013)	--	Interactor of constitutive active ROPs 4 OS=Arabidopsis thaliana OX=3702 GN=ICR4 PE=1 SV=2	Function unknown	hypothetical protein C3L33_10102, partial [Rhododendron williamsianum]		VaccDscaff12-augustus-gene-93.20	--	--	--	--	Cold-regulated protein 27 OS=Arabidopsis thaliana OX=3702 GN=COR27 PE=1 SV=1	Function unknown	hypothetical protein C3L33_10941, partial [Rhododendron williamsianum]
VaccDscaff20-processed-gene-378.19	--	--	--	--	--	--	hypothetical protein C3L33_16168, partial [Rhododendron williamsianum]		VaccDscaff1505-augustus-gene-0.7	--	K08472|5.5e-59|ccav:112517005|K08472 mlo protein | (RefSeq) MLO-like protein 14	--	Mlo family	MLO-like protein 14 OS=Arabidopsis thaliana OX=3702 GN=MLO14 PE=2 SV=1	Carbohydrate transport and metabolism	hypothetical protein C3L33_09971, partial [Rhododendron williamsianum]		VaccDscaff2-processed-gene-235.6	--	K13464|1.3e-24|hbr:110639420|K13464 jasmonate ZIM domain-containing protein | (RefSeq) protein TIFY 9-like	Plant hormone signal transduction (ko04075)	tify domain	Protein TIFY 9 OS=Arabidopsis thaliana OX=3702 GN=TIFY9 PE=1 SV=1	Function unknown	protein TIFY 9 [Camellia sinensis]
VaccDscaff1-augustus-gene-302.30	Lipid transport and metabolism	K10256|2.7e-171|ini:109150720|K10256 omega-6 fatty acid desaturase / acyl-lipid omega-6 desaturase (Delta-12 desaturase) [EC:1.14.19.6 1.14.19.22] | (RefSeq) delta(12)-fatty-acid desaturase FAD2-like	Biosynthesis of unsaturated fatty acids (ko01040);; Fatty acid metabolism (ko01212)	Fatty acid desaturase	Delta(12)-fatty-acid desaturase FAD2 OS=Vernicia fordii OX=73154 GN=FAD2 PE=1 SV=1	Lipid transport and metabolism	hypothetical protein C3L33_12174, partial [Rhododendron williamsianum]		VaccDscaff9-snap-gene-334.17	Cell wall/membrane/envelope biogenesis;; Cell cycle control, cell division, chromosome partitioning;; Signal transduction mechanisms	K08900|1.9e-38|fve:101307344|K08900 mitochondrial chaperone BCS1 | (RefSeq) putative cell division cycle ATPase	--	RNA recognition motif 2	Protein MEI2-like 4 OS=Oryza sativa subsp. japonica OX=39947 GN=ML4 PE=2 SV=1	RNA processing and modification	hypothetical protein C3L33_13297, partial [Rhododendron williamsianum]		VaccDscaff47-augustus-gene-100.19	--	K14491|8.9e-22|bdi:100828175|K14491 two-component response regulator ARR-B family | (RefSeq) two-component response regulator ORR22	Plant hormone signal transduction (ko04075)	Myb-like DNA-binding domain	Transcription factor LUX OS=Arabidopsis thaliana OX=3702 GN=LUX PE=1 SV=1	Transcription	hypothetical protein C3L33_04536, partial [Rhododendron williamsianum]
VaccDscaff191-snap-gene-1.72	--	K10143|1.4e-311|vvi:100246063|K10143 E3 ubiquitin-protein ligase RFWD2 [EC:2.3.2.27] | (RefSeq) E3 ubiquitin-protein ligase COP1	Ubiquitin mediated proteolysis (ko04120);; Circadian rhythm - plant (ko04712)	WD domain, G-beta repeat	E3 ubiquitin-protein ligase COP1 OS=Arabidopsis thaliana OX=3702 GN=COP1 PE=1 SV=2	Signal transduction mechanisms	E3 ubiquitin-protein like [Actinidia chinensis var. chinensis]		VaccDscaff15-processed-gene-368.23	--	--	--	Proline-rich nuclear receptor coactivator motif	--	Function unknown	hypothetical protein C3L33_07480, partial [Rhododendron williamsianum]		VaccDscaff43-augustus-gene-247.32	--	K07375|6.9e-251|lsv:111920833|K07375 tubulin beta | (RefSeq) tubulin beta chain-like	Phagosome (ko04145)	Tubulin/FtsZ family, GTPase domain	Tubulin beta-6 chain OS=Arabidopsis thaliana OX=3702 GN=TUBB6 PE=2 SV=1	Cytoskeleton	tubulin beta chain-like [Lactuca sativa]
VaccDscaff14-augustus-gene-13.24	Function unknown	K15015|2.0e-15|aip:107609646|K15015 solute carrier family 32 (vesicular inhibitory amino acid transporter) | (RefSeq) uncharacterized protein LOC107609646 isoform X1	--	--	IQ domain-containing protein IQM4 OS=Arabidopsis thaliana OX=3702 GN=IQM4 PE=2 SV=1	Function unknown	hypothetical protein C3L33_21781, partial [Rhododendron williamsianum]		VaccDscaff39-augustus-gene-108.31		K13416|5.7e-67|ccaj:109804868|K13416 brassinosteroid insensitive 1-associated receptor kinase 1 [EC:2.7.10.1 2.7.11.1] | (RefSeq) BRASSINOSTEROID INSENSITIVE 1-associated receptor kinase 1-like isoform X1	MAPK signaling pathway - plant (ko04016);; Plant hormone signal transduction (ko04075);; Plant-pathogen interaction (ko04626)	Protein kinase domain	Probable LRR receptor-like serine/threonine-protein kinase At1g07650 OS=Arabidopsis thaliana OX=3702 GN=At1g07650 PE=1 SV=1	Signal transduction mechanisms	LRR receptor-like serine/threonine-protein kinase [Actinidia chinensis var. chinensis]		VaccDscaff35-snap-gene-58.22	--	--	--	Bacterial trigger factor protein (TF)	--	Function unknown	uncharacterized protein LOC114301172 isoform X1 [Camellia sinensis]
VaccDscaff42-augustus-gene-4.37	Energy production and conversion	K00235|3.5e-136|var:108334450|K00235 succinate dehydrogenase (ubiquinone) iron-sulfur subunit [EC:1.3.5.1] | (RefSeq) succinate dehydrogenase [ubiquinone] iron-sulfur subunit 2, mitochondrial	Citrate cycle (TCA cycle) (ko00020);; Oxidative phosphorylation (ko00190);; Carbon metabolism (ko01200)	2Fe-2S iron-sulfur cluster binding domain	Succinate dehydrogenase [ubiquinone] iron-sulfur subunit 2, mitochondrial OS=Arabidopsis thaliana OX=3702 GN=SDH2-2 PE=1 SV=2	Energy production and conversion	Succinate dehydrogenase [ubiquinone] iron-sulfur subunit 2 like [Actinidia chinensis var. chinensis]		VaccDscaff34-snap-gene-90.47	--	K22376|2.3e-21|nsy:104218757|K22376 E3 ubiquitin-protein ligase KCMF1 [EC:2.3.2.27] | (RefSeq) protein DEHYDRATION-INDUCED 19 homolog 4-like	--	Stress-induced protein Di19, C-terminal	Protein DEHYDRATION-INDUCED 19 homolog 6 OS=Oryza sativa subsp. japonica OX=39947 GN=DI19-6 PE=2 SV=1	Function unknown	hypothetical protein C3L33_00627, partial [Rhododendron williamsianum]		VaccDscaff36-augustus-gene-172.20	Carbohydrate transport and metabolism	K01728|7.2e-215|cic:CICLE_v10031429mg|K01728 pectate lyase [EC:4.2.2.2] | (RefSeq) hypothetical protein	Pentose and glucuronate interconversions (ko00040)	Pectate lyase	Probable pectate lyase 5 OS=Arabidopsis thaliana OX=3702 GN=At1g67750 PE=2 SV=2	Carbohydrate transport and metabolism	probable pectate lyase 5 [Camellia sinensis]
VaccDscaff22-augustus-gene-251.20	Carbohydrate transport and metabolism	K09873|2.2e-121|egr:104425948|K09873 aquaporin TIP | (RefSeq) aquaporin TIP1-1	--	Major intrinsic protein	Aquaporin TIP1-1 OS=Arabidopsis thaliana OX=3702 GN=TIP1-1 PE=1 SV=1	Carbohydrate transport and metabolism	Aquaporin TIP1-1 [Morella rubra]		VaccDscaff48-processed-gene-95.0	Cell wall/membrane/envelope biogenesis	K13435|7.6e-102|spen:107018783|K13435 serine/threonine-protein kinase Pto | (RefSeq) receptor-like protein kinase HERK 1 isoform X2	Plant-pathogen interaction (ko04626)	Protein tyrosine and serine/threonine kinase	Probable receptor-like protein kinase At5g24010 OS=Arabidopsis thaliana OX=3702 GN=At5g24010 PE=1 SV=1	Signal transduction mechanisms	probable receptor-like protein kinase At5g24010 [Camellia sinensis]		VaccDscaff40-processed-gene-68.4	--	--	--	Serine hydrolase (FSH1)	Rhodanese-like domain-containing protein 6 OS=Arabidopsis thaliana OX=3702 GN=STR6 PE=2 SV=1	Function unknown	Esterase [Actinidia chinensis var. chinensis]
VaccDscaff18-augustus-gene-375.37	Secondary metabolites biosynthesis, transport and catabolism;; Defense mechanisms	K09588|2.5e-169|cpap:110819283|K09588 cytochrome P450 family 90 subfamily A polypeptide 1 [EC:1.14.-.-] | (RefSeq) cytochrome P450 90A1	Brassinosteroid biosynthesis (ko00905)	Cytochrome P450	Cytochrome P450 90A1 OS=Arabidopsis thaliana OX=3702 GN=CYP90A1 PE=1 SV=1	Secondary metabolites biosynthesis, transport and catabolism	hypothetical protein C3L33_02883, partial [Rhododendron williamsianum]		VaccDscaff45-augustus-gene-59.24	--	K00430|3.1e-136|egr:104430480|K00430 peroxidase [EC:1.11.1.7] | (RefSeq) cationic peroxidase 1-like	Phenylpropanoid biosynthesis (ko00940)	Peroxidase	Cationic peroxidase 1 OS=Arachis hypogaea OX=3818 GN=PNC1 PE=1 SV=2	Secondary metabolites biosynthesis, transport and catabolism	Cationic peroxidase [Actinidia chinensis var. chinensis]		VaccDscaff28-augustus-gene-186.17	Carbohydrate transport and metabolism	K01179|1.2e-246|jcu:105634097|K01179 endoglucanase [EC:3.2.1.4] | (RefSeq) endoglucanase 8	Starch and sucrose metabolism (ko00500)	Glycosyl hydrolase family 9	Endoglucanase 8 OS=Arabidopsis thaliana OX=3702 GN=CEL1 PE=2 SV=1	Carbohydrate transport and metabolism	endoglucanase 8-like isoform X2 [Camellia sinensis]
VaccDscaff53-augustus-gene-7.26	--	K19366|1.5e-156|ccaj:109800657|K19366 spartin | (RefSeq) protein EARLY-RESPONSIVE TO DEHYDRATION 7, chloroplastic-like	Endocytosis (ko04144)	Senescence-associated protein	Protein EARLY-RESPONSIVE TO DEHYDRATION 7, chloroplastic OS=Arabidopsis thaliana OX=3702 GN=ERD7 PE=1 SV=1	Function unknown	hypothetical protein C3L33_17791, partial [Rhododendron williamsianum]		VaccDscaff4-augustus-gene-308.27	--	K18810|5.2e-126|zju:107419860|K18810 cyclin D1/2/4, plant | (RefSeq) cyclin-D1-1	--	Cyclin, N-terminal domain	Cyclin-D1-1 OS=Arabidopsis thaliana OX=3702 GN=CYCD1-1 PE=1 SV=3	Cell cycle control, cell division, chromosome partitioning	hypothetical protein C3L33_14036, partial [Rhododendron williamsianum]		VaccDscaff8-snap-gene-356.38	--	--	--	Heavy-metal-associated domain	Heavy metal-associated isoprenylated plant protein 32 OS=Arabidopsis thaliana OX=3702 GN=HIPP32 PE=2 SV=1	Function unknown	Heavy metal-associated isoprenylated plant protein [Actinidia chinensis var. chinensis]
VaccDscaff23-processed-gene-148.4	--	--	--	Domain of unknown function	--	Function unknown	Protein ACCELERATED CELL DEATH like [Actinidia chinensis var. chinensis]		VaccDscaff33-augustus-gene-180.16	Carbohydrate transport and metabolism	K12373|1.2e-144|rcu:8272227|K12373 hexosaminidase [EC:3.2.1.52] | (RefSeq) beta-hexosaminidase 1	Other glycan degradation (ko00511);; Various types of N-glycan biosynthesis (ko00513);; Amino sugar and nucleotide sugar metabolism (ko00520);; Glycosaminoglycan degradation (ko00531);; Glycosphingolipid biosynthesis - globo and isoglobo series (ko00603);; Glycosphingolipid biosynthesis - ganglio series (ko00604)	Glycosyl hydrolase family 20, catalytic domain	Beta-hexosaminidase 1 OS=Arabidopsis thaliana OX=3702 GN=HEXO1 PE=1 SV=1	Carbohydrate transport and metabolism	hypothetical protein C3L33_22673, partial [Rhododendron williamsianum]		VaccDscaff34-snap-gene-25.20	--	K05933|1.3e-12|egu:105038435|K05933 aminocyclopropanecarboxylate oxidase [EC:1.14.17.4] | (RefSeq) 1-aminocyclopropane-1-carboxylate oxidase-like	Cysteine and methionine metabolism (ko00270)	SAWADEE domain	Protein SAWADEE HOMEODOMAIN HOMOLOG 1 OS=Arabidopsis thaliana OX=3702 GN=SHH1 PE=1 SV=1	Function unknown	hypothetical protein F0562_024720 [Nyssa sinensis]
VaccDscaff11-augustus-gene-19.20	--	K00430|1.7e-129|vvi:100265513|K00430 peroxidase [EC:1.11.1.7] | (RefSeq) lignin-forming anionic peroxidase-like	Phenylpropanoid biosynthesis (ko00940)	Peroxidase	Peroxidase 15 OS=Ipomoea batatas OX=4120 GN=pod PE=1 SV=1	Secondary metabolites biosynthesis, transport and catabolism	hypothetical protein F0562_001365 [Nyssa sinensis]		VaccDscaff75-snap-gene-1.38	--	K12126|1.8e-14|smo:SELMODRAFT_114141|K12126 phytochrome-interacting factor 3 | (RefSeq) PIF3; hypothetical protein	Plant hormone signal transduction (ko04075);; Circadian rhythm - plant (ko04712)	Helix-loop-helix DNA-binding domain	bHLH transcription factor RHL1 OS=Lotus japonicus OX=34305 GN=RHL1 PE=2 SV=1	Transcription	transcription factor BHLH050, partial [Vaccinium corymbosum]		VaccDscaff21-augustus-gene-215.25	--	K23877|2.0e-41|csat:104750868|K23877 xyloglucan O-acetyltransferase | (RefSeq) protein ALTERED XYLOGLUCAN 4-like	--	GDSL/SGNH-like Acyl-Esterase family found in Pmr5 and Cas1p	Protein trichome birefringence-like 36 OS=Arabidopsis thaliana OX=3702 GN=TBL36 PE=2 SV=1	Function unknown	protein trichome birefringence-like 36 [Camellia sinensis]
VaccDscaff37-snap-gene-16.31	Signal transduction mechanisms	K18045|2.1e-88|pper:18783703|K18045 tyrosine-protein phosphatase SIW14 [EC:3.1.3.48] | (RefSeq) probable tyrosine-protein phosphatase At1g05000	--	Tyrosine phosphatase family	Tyrosine-protein phosphatase DSP1 OS=Arabidopsis thaliana OX=3702 GN=DSP1 PE=1 SV=1	Defense mechanisms	hypothetical protein C3L33_10169, partial [Rhododendron williamsianum]		VaccDscaff9-augustus-gene-244.22	Signal transduction mechanisms	K14491|3.2e-176|vvi:100246057|K14491 two-component response regulator ARR-B family | (RefSeq) RRB5; two-component response regulator ORR26	Plant hormone signal transduction (ko04075)	Response regulator receiver domain	Two-component response regulator ORR26 OS=Oryza sativa subsp. japonica OX=39947 GN=RR26 PE=3 SV=2	Transcription	hypothetical protein C3L33_13912, partial [Rhododendron williamsianum]		VaccDscaff7-augustus-gene-20.25	--	K14505|4.2e-107|dzi:111314860|K14505 cyclin D3, plant | (RefSeq) cyclin-D3-1-like	Plant hormone signal transduction (ko04075)	Cyclin, N-terminal domain	Cyclin-D3-3 OS=Arabidopsis thaliana OX=3702 GN=CYCD3-3 PE=2 SV=1	Cell cycle control, cell division, chromosome partitioning	hypothetical protein F0562_027628 [Nyssa sinensis]
VaccDscaff22-augustus-gene-56.34	--	K03260|2.6e-149|jcu:105643252|K03260 translation initiation factor 4G | (RefSeq) eukaryotic translation initiation factor 4G	RNA transport (ko03013)	MIF4G domain	Eukaryotic translation initiation factor 4G OS=Arabidopsis thaliana OX=3702 GN=EIF4G PE=1 SV=2	Translation, ribosomal structure and biogenesis	hypothetical protein C3L33_08145, partial [Rhododendron williamsianum]		VaccDscaff11-snap-gene-219.45	--	K19307|1.1e-83|hbr:110649195|K19307 25S rRNA (uracil2634-N3)-methyltransferase [EC:2.1.1.313] | (RefSeq) uncharacterized protein At4g26485-like isoform X1	--	Domain of unknown function (DUF2431)	Heavy metal-associated isoprenylated plant protein 41 OS=Arabidopsis thaliana OX=3702 GN=HIPP41 PE=3 SV=1	Function unknown	hypothetical protein C3L33_06525, partial [Rhododendron williamsianum]		VaccDscaff10-augustus-gene-66.28	Lipid transport and metabolism;; General function prediction only	K10691|7.5e-83|ats:109762802|K10691 E3 ubiquitin-protein ligase UBR4 [EC:2.3.2.27] | (RefSeq) LOC109762802; auxin transport protein BIG	--	GDSL-like Lipase/Acylhydrolase	GDSL esterase/lipase At2g04570 OS=Arabidopsis thaliana OX=3702 GN=At2g04570 PE=2 SV=1	Function unknown	GDSL esterase/lipase [Actinidia chinensis var. chinensis]
VaccDscaff30-processed-gene-312.1	--	K15803|8.0e-08|qsu:111999375|K15803 (-)-germacrene D synthase [EC:4.2.3.75] | (RefSeq) (-)-germacrene D synthase-like	Sesquiterpenoid and triterpenoid biosynthesis (ko00909)	--	--	Function unknown	hypothetical protein C3L33_01683, partial [Rhododendron williamsianum]		VaccDscaff3-snap-gene-189.49	Posttranslational modification, protein turnover, chaperones	K13993|4.5e-79|jre:109014840|K13993 HSP20 family protein | (RefSeq) small heat shock protein, chloroplastic-like	Protein processing in endoplasmic reticulum (ko04141)	Hsp20/alpha crystallin family	Heat shock protein 21, chloroplastic OS=Arabidopsis thaliana OX=3702 GN=HSP21 PE=1 SV=1	Posttranslational modification, protein turnover, chaperones	hypothetical protein C3L33_13408, partial [Rhododendron williamsianum]		VaccDscaff23-processed-gene-142.8	--	--	--	Cotton fibre expressed protein	--	Function unknown	uncharacterized protein LOC114273770 [Camellia sinensis]
VaccDscaff37-augustus-gene-109.18	--	K03542|1.3e-111|vvi:100245393|K03542 photosystem II 22kDa protein | (RefSeq) photosystem II 22 kDa protein, chloroplastic	Photosynthesis (ko00195)	Chlorophyll A-B binding protein	Photosystem II 22 kDa protein, chloroplastic OS=Solanum lycopersicum OX=4081 GN=PSBS PE=3 SV=1	Function unknown	hypothetical protein C3L33_11347, partial [Rhododendron williamsianum]		VaccDscaff38-augustus-gene-0.16	--	K13065|7.6e-149|vvi:100246835|K13065 shikimate O-hydroxycinnamoyltransferase [EC:2.3.1.133] | (RefSeq) spermidine hydroxycinnamoyl transferase-like	Phenylpropanoid biosynthesis (ko00940);; Flavonoid biosynthesis (ko00941);; Stilbenoid, diarylheptanoid and gingerol biosynthesis (ko00945)	Transferase family	Spermidine hydroxycinnamoyl transferase OS=Arabidopsis thaliana OX=3702 GN=SHT PE=1 SV=1	Function unknown	hypothetical protein C3L33_05535, partial [Rhododendron williamsianum]		VaccDscaff38-augustus-gene-271.24	--	--	--	--	--	--	hypothetical protein C3L33_10144, partial [Rhododendron williamsianum]
VaccDscaff23-snap-gene-330.30	Secondary metabolites biosynthesis, transport and catabolism;; Defense mechanisms	K23136|5.3e-170|gra:105769156|K23136 fraxetin 5-hydroxylase [EC:1.14.14.164] | (RefSeq) uncharacterized LOC105769156	--	Cytochrome P450	Cytochrome P450 82A3 OS=Glycine max OX=3847 GN=CYP82A3 PE=2 SV=1	Secondary metabolites biosynthesis, transport and catabolism	LOW QUALITY PROTEIN: cytochrome P450 CYP82D47-like [Camellia sinensis]		VaccDscaff14-processed-gene-365.8	Lipid transport and metabolism	K20506|1.9e-84|egu:105060863|K20506 tuliposide A-converting enzyme [EC:4.2.99.22] | (RefSeq) tuliposide A-converting enzyme 2, chloroplastic-like	--	alpha/beta hydrolase fold	Probable carboxylesterase 2 OS=Arabidopsis thaliana OX=3702 GN=CXE2 PE=2 SV=1	Defense mechanisms	probable carboxylesterase 12 [Camellia sinensis]		VaccDscaff26-processed-gene-60.5	--	--	--	PAR1 protein	--	Function unknown	PAR1 protein [Actinidia chinensis var. chinensis]
VaccDscaff11-processed-gene-94.1	--	--	--	Late embryogenesis abundant protein	NDR1/HIN1-like protein 13 OS=Arabidopsis thaliana OX=3702 GN=NHL13 PE=2 SV=1	Function unknown	hypothetical protein C3L33_06015, partial [Rhododendron williamsianum]		VaccDscaff126-snap-gene-3.69	Carbohydrate transport and metabolism	K12309|4.7e-190|csat:104711840|K12309 beta-galactosidase [EC:3.2.1.23] | (RefSeq) LOW QUALITY PROTEIN: beta-galactosidase 2	Galactose metabolism (ko00052);; Other glycan degradation (ko00511);; Glycosaminoglycan degradation (ko00531);; Sphingolipid metabolism (ko00600);; Glycosphingolipid biosynthesis - ganglio series (ko00604)	Glycosyl hydrolases family 35	Beta-galactosidase 3 OS=Arabidopsis thaliana OX=3702 GN=BGAL3 PE=2 SV=1	Carbohydrate transport and metabolism	hypothetical protein C3L33_20797, partial [Rhododendron williamsianum]		VaccDscaff23-augustus-gene-330.25	Secondary metabolites biosynthesis, transport and catabolism;; Defense mechanisms	K23136|7.0e-181|gra:105769156|K23136 fraxetin 5-hydroxylase [EC:1.14.14.164] | (RefSeq) uncharacterized LOC105769156	--	Cytochrome P450	Cytochrome P450 82A3 OS=Glycine max OX=3847 GN=CYP82A3 PE=2 SV=1	Secondary metabolites biosynthesis, transport and catabolism	LOW QUALITY PROTEIN: cytochrome P450 CYP82D47-like [Camellia sinensis]
VaccDscaff12-snap-gene-258.18	Posttranslational modification, protein turnover, chaperones	K04078|1.3e-48|sly:101246758|K04078 chaperonin GroES | (RefSeq) 10 kDa chaperonin 1, chloroplastic	--	Chaperonin 10 Kd subunit	10 kDa chaperonin 1, chloroplastic OS=Arabidopsis thaliana OX=3702 GN=CPN10-1 PE=2 SV=1	Posttranslational modification, protein turnover, chaperones	hypothetical protein C3L33_05064, partial [Rhododendron williamsianum]		VaccDscaff24-snap-gene-17.35	Translation, ribosomal structure and biogenesis	K13207|4.9e-193|rcu:8287198|K13207 CUG-BP- and ETR3-like factor | (RefSeq) RNA-binding protein BRN1 isoform X1	--	RNA recognition motif. (a.k.a. RRM, RBD, or RNP domain)	RNA-binding protein BRN1 OS=Arabidopsis thaliana OX=3702 GN=BRN1 PE=2 SV=1	RNA processing and modification	hypothetical protein HYC85_031204, partial [Camellia sinensis]		VaccDscaff43-processed-gene-22.1	--	--	--	Glutamyl-tRNAGlu reductase, dimerisation domain	--	--	hypothetical protein C3L33_04088, partial [Rhododendron williamsianum]
VaccDscaff13-augustus-gene-323.40	Carbohydrate transport and metabolism	K24193|4.5e-246|pmum:103340871|K24193 MFS transporter, SP family, sugar:H+ symporter | (RefSeq) sugar transport protein 14	--	Sugar (and other) transporter	Sugar transport protein 14 OS=Arabidopsis thaliana OX=3702 GN=STP14 PE=2 SV=2	Intracellular trafficking, secretion, and vesicular transport	Sugar transport protein [Actinidia chinensis var. chinensis]		VaccDscaff56-processed-gene-4.0	--	K06268|9.4e-23|bdi:100831266|K06268 serine/threonine-protein phosphatase 2B regulatory subunit | (RefSeq) myosin-binding protein 3	--	Zein-binding	Myosin-binding protein 7 OS=Arabidopsis thaliana OX=3702 GN=MYOB7 PE=1 SV=1	Function unknown	hypothetical protein C3L33_03793, partial [Rhododendron williamsianum]		VaccDscaff15-snap-gene-344.57	Posttranslational modification, protein turnover, chaperones	K09510|9.0e-13|apro:F751_2966|K09510 DnaJ homolog subfamily B member 4 | (RefSeq) DnaJ-like protein subfamily B member 5	--	DnaJ domain	Chaperone protein dnaJ 20, chloroplastic OS=Arabidopsis thaliana OX=3702 GN=ATJ20 PE=1 SV=2	Posttranslational modification, protein turnover, chaperones	hypothetical protein C3L33_07264, partial [Rhododendron williamsianum]
VaccDscaff32-augustus-gene-61.32	--	K15102|5.0e-147|mcha:111007504|K15102 solute carrier family 25 (mitochondrial phosphate transporter), member 3 | (RefSeq) mitochondrial phosphate carrier protein 1, mitochondrial	--	Mitochondrial carrier protein	Mitochondrial phosphate carrier protein 1, mitochondrial OS=Arabidopsis thaliana OX=3702 GN=MPT1 PE=2 SV=1	Energy production and conversion	hypothetical protein C3L33_19440, partial [Rhododendron williamsianum]		VaccDscaff42-snap-gene-47.34	--	K23452|3.6e-218|eus:EUTSA_v10009957mg|K23452 UDP-glucosyltransferase 85A [EC:2.4.1.-] | (RefSeq) hypothetical protein	Zeatin biosynthesis (ko00908)	UDP-glucoronosyl and UDP-glucosyl transferase	7-deoxyloganetin glucosyltransferase OS=Gardenia jasminoides OX=114476 GN=UGT85A24 PE=1 SV=1	--	7-deoxyloganetin glucosyltransferase [Mucuna pruriens]		VaccDscaff31-snap-gene-314.37	--	K12173|2.2e-36|gmx:100794341|K12173 BRCA1-A complex subunit BRE | (RefSeq) BRISC and BRCA1-A complex member 2	Homologous recombination (ko03440)	Thaumatin family	Pathogenesis-related protein 5 OS=Arabidopsis thaliana OX=3702 GN=At1g75040 PE=1 SV=1	Function unknown	hypothetical protein C3L33_09546, partial [Rhododendron williamsianum]
VaccDscaff24-snap-gene-223.24	Inorganic ion transport and metabolism	K01082|9.0e-134|vvi:100250311|K01082 3'(2'), 5'-bisphosphate nucleotidase [EC:3.1.3.7] | (RefSeq) PAP-specific phosphatase HAL2-like	Sulfur metabolism (ko00920)	Inositol monophosphatase family	PAP-specific phosphatase HAL2-like OS=Arabidopsis thaliana OX=3702 GN=AHL PE=2 SV=1	--	PAP-specific phosphatase HAL2-like [Camellia sinensis]		Vaccinium_corymbosum_newGene_1152	--	--	--	Reverse transcriptase-like	--	--	uncharacterized protein LOC114297517 [Camellia sinensis]		VaccDscaff377-snap-gene-0.37	--	--	--	--	Cold-regulated protein 27 OS=Arabidopsis thaliana OX=3702 GN=COR27 PE=1 SV=1	Function unknown	hypothetical protein C3L33_20919, partial [Rhododendron williamsianum]
VaccDscaff28-augustus-gene-291.23	--	K09184|7.4e-29|vvi:104879571|K09184 GATA-binding protein, other eukaryote | (RefSeq) GATA transcription factor 8	--	GATA zinc finger	GATA transcription factor 8 OS=Arabidopsis thaliana OX=3702 GN=GATA8 PE=1 SV=1	Transcription	hypothetical protein C3L33_16764, partial [Rhododendron williamsianum]		VaccDscaff24-augustus-gene-30.23	--	--	--	PDDEXK-like family of unknown function	--	Function unknown	Translation initiation factor IF-2 like [Actinidia chinensis var. chinensis]		VaccDscaff21-snap-gene-36.25	--	K23113|0.0e+00|qsu:112034621|K23113 structural maintenance of chromosomes flexible hinge domain-containing protein 1 | (RefSeq) uncharacterized protein LOC112034621	--	Histidine kinase-, DNA gyrase B-, and HSP90-like ATPase	Structural maintenance of chromosomes flexible hinge domain-containing protein GMI1 OS=Arabidopsis thaliana OX=3702 GN=GMI1 PE=2 SV=1	Function unknown	structural maintenance of chromosomes flexible hinge domain-containing protein GMI1 [Camellia sinensis]
VaccDscaff77-augustus-gene-2.30	Replication, recombination and repair	K01669|7.7e-223|nnu:104611286|K01669 deoxyribodipyrimidine photo-lyase [EC:4.1.99.3] | (RefSeq) deoxyribodipyrimidine photo-lyase	--	DNA photolyase	Deoxyribodipyrimidine photo-lyase OS=Arabidopsis thaliana OX=3702 GN=PHR1 PE=2 SV=1	--	deoxyribodipyrimidine photo-lyase isoform X1 [Camellia sinensis]		VaccDscaff34-augustus-gene-289.29	--	K13435|3.0e-11|spen:107018783|K13435 serine/threonine-protein kinase Pto | (RefSeq) receptor-like protein kinase HERK 1 isoform X2	Plant-pathogen interaction (ko04626)	Malectin-like domain	Receptor-like protein kinase FERONIA OS=Arabidopsis thaliana OX=3702 GN=FER PE=1 SV=1	Signal transduction mechanisms	Receptor-like protein kinase [Actinidia chinensis var. chinensis]		VaccDscaff9-augustus-gene-161.18	--	--	--	Dormancy/auxin associated protein	Auxin-repressed 12.5 kDa protein OS=Fragaria ananassa OX=3747 PE=2 SV=1	Function unknown	hypothetical protein C3L33_15537, partial [Rhododendron williamsianum]
VaccDscaff3-processed-gene-103.12	--	K03327|2.7e-17|nta:107781954|K03327 multidrug resistance protein, MATE family | (RefSeq) protein DETOXIFICATION 14-like	--	Domain of unknown function (DUF4228)	--	Function unknown	hypothetical protein C3L33_17718, partial [Rhododendron williamsianum]		VaccDscaff45-processed-gene-32.5	--	--	--	Protein of unknown function (DUF740)	Protein OCTOPUS OS=Arabidopsis thaliana OX=3702 GN=OPS PE=1 SV=1	Function unknown	hypothetical protein C3L33_20403, partial [Rhododendron williamsianum]		VaccDscaff8-augustus-gene-356.27	--	K07374|2.2e-257|dzi:111281785|K07374 tubulin alpha | (RefSeq) tubulin alpha-2 chain	Phagosome (ko04145)	Tubulin/FtsZ family, GTPase domain	Tubulin alpha chain OS=Prunus dulcis OX=3755 GN=TUBA PE=2 SV=1	Cytoskeleton	hypothetical protein CBR_g11996 [Chara braunii]
VaccDscaff31-augustus-gene-330.28	Cell cycle control, cell division, chromosome partitioning;; Inorganic ion transport and metabolism;; Cell wall/membrane/envelope biogenesis	K19791|1.4e-195|oeu:111379234|K19791 iron transport multicopper oxidase | (RefSeq) L-ascorbate oxidase homolog	--	Multicopper oxidase	L-ascorbate oxidase homolog OS=Brassica napus OX=3708 GN=Bp10 PE=2 SV=1	Secondary metabolites biosynthesis, transport and catabolism	hypothetical protein C3L33_09434, partial [Rhododendron williamsianum]		VaccDscaff12-processed-gene-307.27	--	--	--	Protein of unknown function (DUF632)	Protein ALTERED PHOSPHATE STARVATION RESPONSE 1 OS=Arabidopsis thaliana OX=3702 GN=APSR1 PE=2 SV=1	Function unknown	hypothetical protein C3L33_05150, partial [Rhododendron williamsianum]		VaccDscaff17-augustus-gene-268.32	Nucleotide transport and metabolism	K14611|1.4e-266|nsy:104231657|K14611 solute carrier family 23 (nucleobase transporter), member 1 | (RefSeq) nucleobase-ascorbate transporter 6	--	Permease family	Nucleobase-ascorbate transporter 6 OS=Arabidopsis thaliana OX=3702 GN=NAT6 PE=2 SV=2	Nucleotide transport and metabolism	Nucleobase-ascorbate transporter like [Actinidia chinensis var. chinensis]
VaccDscaff11-augustus-gene-387.23	Defense mechanisms	K05666|0.0e+00|qsu:112039114|K05666 ATP-binding cassette, subfamily C (CFTR/MRP), member 2 | (RefSeq) ABC transporter C family member 14-like	ABC transporters (ko02010)	ABC transporter transmembrane region	ABC transporter C family member 14 OS=Arabidopsis thaliana OX=3702 GN=ABCC14 PE=1 SV=1	Secondary metabolites biosynthesis, transport and catabolism	ABC transporter C family member 14-like [Camellia sinensis]		VaccDscaff16-augustus-gene-145.18	Energy production and conversion	K01455|2.4e-274|nau:109208879|K01455 formamidase [EC:3.5.1.49] | (RefSeq) uncharacterized protein LOC109208879 isoform X1	Cyanoamino acid metabolism (ko00460);; Glyoxylate and dicarboxylate metabolism (ko00630);; Nitrogen metabolism (ko00910);; Carbon metabolism (ko01200)	Acetamidase/Formamidase family	--	Energy production and conversion	hypothetical protein CMV_016205 [Castanea mollissima]		VaccDscaff23-augustus-gene-195.32	--	K03097|5.2e-18|aip:107632886|K03097 casein kinase II subunit alpha [EC:2.7.11.1] | (RefSeq) casein kinase II subunit alpha-like isoform X3	Ribosome biogenesis in eukaryotes (ko03008);; Circadian rhythm - plant (ko04712)	Protein of unknown function (DUF642)	--	Function unknown	E3 ubiquitin-protein ligase DTX2 [Actinidia chinensis var. chinensis]
VaccDscaff7-augustus-gene-383.25	--	--	--	--	--	--	hypothetical protein F0562_004982 [Nyssa sinensis]		VaccDscaff7-augustus-gene-20.21	--	--	--	--	--	--	hypothetical protein F0562_027626 [Nyssa sinensis]		VaccDscaff42-augustus-gene-101.26	--	K00430|5.1e-158|nnu:104593959|K00430 peroxidase [EC:1.11.1.7] | (RefSeq) peroxidase 72-like	Phenylpropanoid biosynthesis (ko00940)	Peroxidase	Peroxidase 72 OS=Arabidopsis thaliana OX=3702 GN=PER72 PE=1 SV=1	Carbohydrate transport and metabolism	hypothetical protein C3L33_01079, partial [Rhododendron williamsianum]
VaccDscaff11-processed-gene-318.2	--	K20359|1.9e-60|dcr:108211071|K20359 PRA1 family protein 1 | (RefSeq) PRA1 family protein B3	--	PRA1 family protein	PRA1 family protein B3 OS=Arabidopsis thaliana OX=3702 GN=PRA1B3 PE=1 SV=1	Intracellular trafficking, secretion, and vesicular transport	hypothetical protein C3L33_07138, partial [Rhododendron williamsianum]		VaccDscaff40-snap-gene-200.36	--	--	--	RNA recognition motif. (a.k.a. RRM, RBD, or RNP domain)	--	--	Polyadenylate-binding protein like [Actinidia chinensis var. chinensis]		VaccDscaff40-augustus-gene-281.20	--	K08518|5.9e-88|psom:113309637|K08518 syntaxin-binding protein 5 | (RefSeq) uncharacterized protein LOC113309637 isoform X1	--	Lethal giant larvae(Lgl) like, C-terminal	--	Function unknown	hypothetical protein C3L33_17869, partial [Rhododendron williamsianum]
VaccDscaff28-snap-gene-180.28	Amino acid transport and metabolism;; Nucleotide transport and metabolism	K00830|2.4e-99|hbr:110634391|K00830 alanine-glyoxylate transaminase / serine-glyoxylate transaminase / serine-pyruvate transaminase [EC:2.6.1.44 2.6.1.45 2.6.1.51] | (RefSeq) serine--glyoxylate aminotransferase	Alanine, aspartate and glutamate metabolism (ko00250);; Glycine, serine and threonine metabolism (ko00260);; Glyoxylate and dicarboxylate metabolism (ko00630);; Carbon metabolism (ko01200);; Peroxisome (ko04146)	--	Serine--glyoxylate aminotransferase OS=Arabidopsis thaliana OX=3702 GN=AGT1 PE=1 SV=2	Amino acid transport and metabolism	hypothetical protein C3L33_05906, partial [Rhododendron williamsianum]		VaccDscaff4-augustus-gene-54.37	--	--	--	Auxin canalisation	VAN3-binding protein OS=Arabidopsis thaliana OX=3702 GN=VAB PE=1 SV=1	Function unknown	hypothetical protein C3L33_15001, partial [Rhododendron williamsianum]		VaccDscaff2-snap-gene-346.27	--	K14638|2.0e-229|oeu:111411776|K14638 solute carrier family 15 (peptide/histidine transporter), member 3/4 | (RefSeq) protein NRT1/ PTR FAMILY 4.5-like	--	POT family	Protein NRT1/ PTR FAMILY 4.6 OS=Arabidopsis thaliana OX=3702 GN=NPF4.6 PE=1 SV=1	Amino acid transport and metabolism	hypothetical protein C3L33_21368, partial [Rhododendron williamsianum]
VaccDscaff24-augustus-gene-210.35	--	K21435|3.0e-18|mtr:MTR_7g099570|K21435 ankyrin repeat domain-containing protein 6 | (RefSeq) ankyrin repeat protein	--	Ankyrin repeats (3 copies)	--	Function unknown	hypothetical protein HYC85_027502 [Camellia sinensis]		VaccDscaff19-processed-gene-218.10	--	K12761|1.4e-16|ini:109164801|K12761 carbon catabolite-derepressing protein kinase [EC:2.7.11.1] | (RefSeq) CBL-interacting serine/threonine-protein kinase 7-like	--	Domain of unknown function (DUF4228)	--	Function unknown	uncharacterized protein LOC108980949 [Juglans regia]		VaccDscaff4-processed-gene-48.32	--	K07025|1.5e-57|zju:107423015|K07025 putative hydrolase of the HAD superfamily | (RefSeq) uncharacterized protein C24B11.05-like isoform X2	--	Haloacid dehalogenase-like hydrolase	--	Function unknown	Pyrimidine 5-nucleotidase protein [Actinidia chinensis var. chinensis]
VaccDscaff14-augustus-gene-350.29	--	K01102|1.4e-164|mcha:111017290|K01102 pyruvate dehydrogenase phosphatase [EC:3.1.3.43] | (RefSeq) probable protein phosphatase 2C 63	--	Protein phosphatase 2C	Probable protein phosphatase 2C 63 OS=Arabidopsis thaliana OX=3702 GN=At4g33920 PE=2 SV=1	Signal transduction mechanisms	hypothetical protein C3L33_20983, partial [Rhododendron williamsianum]		VaccDscaff1267-augustus-gene-0.6	Amino acid transport and metabolism	K14638|1.7e-181|vvi:104882758|K14638 solute carrier family 15 (peptide/histidine transporter), member 3/4 | (RefSeq) protein NRT1/ PTR FAMILY 5.10	--	POT family	Protein NRT1/ PTR FAMILY 5.10 OS=Arabidopsis thaliana OX=3702 GN=NPF5.10 PE=2 SV=1	Amino acid transport and metabolism	Protein NRT1/ PTR FAMILY 5.10 like [Actinidia chinensis var. chinensis]		VaccDscaff41-augustus-gene-104.30	--	K03097|5.2e-18|aip:107632886|K03097 casein kinase II subunit alpha [EC:2.7.11.1] | (RefSeq) casein kinase II subunit alpha-like isoform X3	Ribosome biogenesis in eukaryotes (ko03008);; Circadian rhythm - plant (ko04712)	Protein of unknown function (DUF642)	--	Function unknown	hypothetical protein F0562_018732 [Nyssa sinensis]
VaccDscaff43-processed-gene-212.1	--	K09286|2.4e-61|nnu:104610488|K09286 EREBP-like factor | (RefSeq) ethylene-responsive transcription factor ERF105-like	--	AP2 domain	Ethylene-responsive transcription factor 5 OS=Nicotiana tabacum OX=4097 GN=ERF5 PE=2 SV=1	Transcription	hypothetical protein C3L33_08712, partial [Rhododendron williamsianum]		VaccDscaff9-augustus-gene-358.32	Carbohydrate transport and metabolism	K01728|1.8e-210|gab:108477117|K01728 pectate lyase [EC:4.2.2.2] | (RefSeq) probable pectate lyase 5	Pentose and glucuronate interconversions (ko00040)	Pectate lyase	Probable pectate lyase 5 OS=Arabidopsis thaliana OX=3702 GN=At1g67750 PE=2 SV=2	Carbohydrate transport and metabolism	Pectate lyase [Actinidia chinensis var. chinensis]		VaccDscaff16-augustus-gene-348.28	--	K07374|2.9e-257|egu:105061039|K07374 tubulin alpha | (RefSeq) tubulin alpha chain	Phagosome (ko04145)	Tubulin/FtsZ family, GTPase domain	Tubulin alpha chain OS=Prunus dulcis OX=3755 GN=TUBA PE=2 SV=1	Cytoskeleton	tubulin alpha chain [Elaeis guineensis]
VaccDscaff34-snap-gene-180.34	--	--	--	Calmodulin binding protein-like	Calmodulin-binding protein 60 D OS=Arabidopsis thaliana OX=3702 GN=CBP60D PE=2 SV=1	Function unknown	hypothetical protein C3L33_22271, partial [Rhododendron williamsianum]		VaccDscaff1744-snap-gene-0.5	--	K03093|2.0e-63|vvi:100250120|K03093 RNA polymerase sigma factor | (RefSeq) RNA polymerase sigma factor sigE, chloroplastic/mitochondrial	--	--	RNA polymerase sigma factor sigE, chloroplastic/mitochondrial OS=Arabidopsis thaliana OX=3702 GN=SIGE PE=1 SV=1	Transcription	hypothetical protein C3L33_03317, partial [Rhododendron williamsianum]		VaccDscaff9-processed-gene-81.2	--	K13692|3.0e-101|csat:104718848|K13692 UDP-glucose:(indol-3-yl)acetate beta-D-glucosyltransferase [EC:2.4.1.121] | (RefSeq) UDP-glycosyltransferase 75D1-like	--	UDP-glucoronosyl and UDP-glucosyl transferase	Crocetin glucosyltransferase, chloroplastic OS=Gardenia jasminoides OX=114476 GN=UGT75L6 PE=1 SV=1	Function unknown	Crocetin glucosyltransferase [Actinidia chinensis var. chinensis]
VaccDscaff36-snap-gene-304.19	--	--	--	Aluminium induced protein	Stem-specific protein TSJT1 OS=Nicotiana tabacum OX=4097 GN=TSJT1 PE=2 SV=1	Function unknown	hypothetical protein F0562_014092 [Nyssa sinensis]		VaccDscaff6-processed-gene-108.6	--	--	--	Salt stress response/antifungal	Cysteine-rich repeat secretory protein 38 OS=Arabidopsis thaliana OX=3702 GN=CRRSP38 PE=2 SV=1	Function unknown	hypothetical protein C3L33_10313, partial [Rhododendron williamsianum]		VaccDscaff35-augustus-gene-273.51	--	K17279|2.1e-78|vvi:100255163|K17279 receptor expression-enhancing protein 5/6 | (RefSeq) HVA22-like protein a	--	TB2/DP1, HVA22 family	HVA22-like protein c OS=Arabidopsis thaliana OX=3702 GN=HVA22C PE=2 SV=1	Intracellular trafficking, secretion, and vesicular transport	hypothetical protein HYC85_015492 [Camellia sinensis]
VaccDscaff9-augustus-gene-407.23	--	K09422|2.9e-81|tcc:18596211|K09422 transcription factor MYB, plant | (RefSeq) transcription factor TT2	--	Myb-like DNA-binding domain	Transcription factor MYB1 OS=Crocosmia x crocosmiiflora OX=1053288 GN=MYB1 PE=2 SV=1	Transcription	Transcription repressor like [Actinidia chinensis var. chinensis]		VaccDscaff25-snap-gene-271.28	--	--	--	RCD1-SRO-TAF4 (RST) plant domain	Probable inactive poly [ADP-ribose] polymerase SRO2 OS=Arabidopsis thaliana OX=3702 GN=SRO2 PE=1 SV=1	Function unknown	probable inactive poly [ADP-ribose] polymerase SRO2 isoform X2 [Camellia sinensis]		VaccDscaff4-augustus-gene-85.36	--	--	--	--	--	Function unknown	uncharacterized protein LOC114261252 [Camellia sinensis]
VaccDscaff18-augustus-gene-285.18	--	K09422|4.3e-101|dzi:111291875|K09422 transcription factor MYB, plant | (RefSeq) transcription factor RAX3-like	--	Myb-like DNA-binding domain	Transcription factor RAX3 OS=Arabidopsis thaliana OX=3702 GN=RAX3 PE=2 SV=1	--	transcription factor RAX3 [Camellia sinensis]		VaccDscaff17-processed-gene-241.5	--	--	--	GDSL-like Lipase/Acylhydrolase	GDSL esterase/lipase At1g28600 OS=Arabidopsis thaliana OX=3702 GN=At1g28600 PE=2 SV=1	Function unknown	GDSL esterase/lipase [Actinidia chinensis var. chinensis]		VaccDscaff4-processed-gene-265.11	--	K17616|3.1e-50|oeu:111404463|K17616 CTD small phosphatase-like protein 2 [EC:3.1.3.-] | (RefSeq) uncharacterized protein LOC111404463	--	Rubber elongation factor protein (REF)	REF/SRPP-like protein At1g67360 OS=Arabidopsis thaliana OX=3702 GN=At1g67360 PE=2 SV=1	Function unknown	hypothetical protein C3L33_13859, partial [Rhododendron williamsianum]
VaccDscaff44-processed-gene-30.9	--	--	--	--	--	--	hypothetical protein CDL15_Pgr017957 [Punica granatum]		Vaccinium_corymbosum_newGene_15318	--	--	--	--	--	--	PREDICTED: uncharacterized protein LOC100248142 [Vitis vinifera]		VaccDscaff3-processed-gene-106.7	Posttranslational modification, protein turnover, chaperones	K13993|8.4e-66|nsy:104211476|K13993 HSP20 family protein | (RefSeq) 17.3 kDa class II heat shock protein-like	Protein processing in endoplasmic reticulum (ko04141)	Hsp20/alpha crystallin family	17.3 kDa class II heat shock protein OS=Solanum peruvianum OX=4082 PE=2 SV=1	Posttranslational modification, protein turnover, chaperones	small heat shock protein HSP17.7 [Vaccinium corymbosum]
VaccDscaff15-processed-gene-241.11	Energy production and conversion	K22395|7.9e-185|nsy:104227327|K22395 cinnamyl-alcohol dehydrogenase [EC:1.1.1.195] | (RefSeq) cannabidiolic acid synthase-like	Phenylpropanoid biosynthesis (ko00940)	FAD binding domain	Berberine bridge enzyme-like 8 OS=Arabidopsis thaliana OX=3702 GN=At1g30700 PE=2 SV=1	Energy production and conversion	hypothetical protein C3L33_08651, partial [Rhododendron williamsianum]		VaccDscaff33-augustus-gene-119.19	General function prediction only	K07910|3.2e-97|jre:109004318|K07910 Ras-related protein Rab-18 | (RefSeq) ras-related protein RABC2a-like isoform X1	--	Ras family	Ras-related protein RABC2a OS=Arabidopsis thaliana OX=3702 GN=RABC2A PE=1 SV=1	Intracellular trafficking, secretion, and vesicular transport	hypothetical protein C3L33_02607, partial [Rhododendron williamsianum]		VaccDscaff26-snap-gene-123.44	--	K00522|1.4e-48|vra:106756485|K00522 ferritin heavy chain [EC:1.16.3.2] | (RefSeq) ferritin-3, chloroplastic	--	Ferritin-like domain	Ferritin-3, chloroplastic OS=Glycine max OX=3847 PE=2 SV=1	Inorganic ion transport and metabolism	ferritin-3, chloroplastic [Vigna radiata var. radiata]
VaccDscaff17-augustus-gene-307.27	Cell wall/membrane/envelope biogenesis	K01114|4.9e-259|rcu:8269216|K01114 phospholipase C [EC:3.1.4.3] | (RefSeq) non-specific phospholipase C6	Inositol phosphate metabolism (ko00562);; Glycerophospholipid metabolism (ko00564);; Ether lipid metabolism (ko00565)	Phosphoesterase family	Non-specific phospholipase C6 OS=Arabidopsis thaliana OX=3702 GN=NPC6 PE=2 SV=1	Cell wall/membrane/envelope biogenesis	hypothetical protein C3L33_00519, partial [Rhododendron williamsianum]		VaccDscaff39-snap-gene-143.28	--	K12309|4.6e-63|brp:103872148|K12309 beta-galactosidase [EC:3.2.1.23] | (RefSeq) beta-galactosidase 2	Galactose metabolism (ko00052);; Other glycan degradation (ko00511);; Glycosaminoglycan degradation (ko00531);; Sphingolipid metabolism (ko00600);; Glycosphingolipid biosynthesis - ganglio series (ko00604)	Galactose binding lectin domain	Beta-galactosidase 3 OS=Oryza sativa subsp. japonica OX=39947 GN=Os01g0875500 PE=3 SV=1	Carbohydrate transport and metabolism	beta-galactosidase 3 [Camellia sinensis]		VaccDscaff33-augustus-gene-216.27	Inorganic ion transport and metabolism	K00522|1.2e-95|spen:107020362|K00522 ferritin heavy chain [EC:1.16.3.2] | (RefSeq) ferritin-2, chloroplastic	--	Ferritin-like domain	Ferritin-2, chloroplastic OS=Nicotiana tabacum OX=4097 GN=FER2 PE=2 SV=1	Inorganic ion transport and metabolism	ferritin-3, chloroplastic-like [Camellia sinensis]
VaccDscaff29-processed-gene-258.8	--	K10260|5.1e-14|cre:CHLREDRAFT_205525|K10260 F-box and WD-40 domain protein 7 | (RefSeq) predicted protein	Ubiquitin mediated proteolysis (ko04120)	U-box domain	E3 ubiquitin-protein ligase PUB23 OS=Arabidopsis thaliana OX=3702 GN=PUB23 PE=1 SV=1	Coenzyme transport and metabolism	hypothetical protein C3L33_02446, partial [Rhododendron williamsianum]		VaccDscaff28-augustus-gene-175.22	--	K11699|0.0e+00|sind:105160121|K11699 RNA-dependent RNA polymerase [EC:2.7.7.48] | (RefSeq) probable RNA-dependent RNA polymerase 1	--	RNA dependent RNA polymerase	RNA-dependent RNA polymerase 1 OS=Arabidopsis thaliana OX=3702 GN=RDR1 PE=2 SV=1	RNA processing and modification	hypothetical protein HYC85_027474 [Camellia sinensis]		VaccDscaff42-augustus-gene-13.26	--	K12198|2.4e-24|sita:101765827|K12198 charged multivesicular body protein 5 | (RefSeq) vacuolar protein sorting-associated protein 60.1	Endocytosis (ko04144)	Light regulated protein Lir1	Light-regulated protein 1, chloroplastic OS=Arabidopsis thaliana OX=3702 GN=LIR1 PE=1 SV=1	Function unknown	hypothetical protein C3L33_22018, partial [Rhododendron williamsianum]
VaccDscaff13-augustus-gene-68.37	--	K11877|3.6e-47|pper:18784253|K11877 proteasome assembly chaperone 3 | (RefSeq) proteasome assembly chaperone 3	--	Proteasome assembly chaperone 3	--	Function unknown	proteasome assembly chaperone 3 isoform X2 [Camellia sinensis]		VaccDscaff29-snap-gene-4.21	Energy production and conversion	K00279|1.7e-216|nta:107793379|K00279 cytokinin dehydrogenase [EC:1.5.99.12] | (RefSeq) cytokinin dehydrogenase 3-like	Zeatin biosynthesis (ko00908)	Cytokinin dehydrogenase 1, FAD and cytokinin binding	Cytokinin dehydrogenase 3 OS=Arabidopsis thaliana OX=3702 GN=CKX3 PE=1 SV=1	Energy production and conversion	hypothetical protein F0562_009677 [Nyssa sinensis]		VaccDscaff22-snap-gene-362.54	Carbohydrate transport and metabolism	K01188|2.6e-290|bdi:100838459|K01188 beta-glucosidase [EC:3.2.1.21] | (RefSeq) uncharacterized protein LOC100838459	Cyanoamino acid metabolism (ko00460);; Starch and sucrose metabolism (ko00500);; Phenylpropanoid biosynthesis (ko00940)	Glycosyl hydrolase family 1	Beta-glucosidase 11 OS=Arabidopsis thaliana OX=3702 GN=BGLU11 PE=2 SV=2	Carbohydrate transport and metabolism	unnamed protein product, partial [Vitis vinifera]
VaccDscaff10-snap-gene-16.36	Signal transduction mechanisms	K24104|2.5e-76|thj:104799061|K24104 GPN-loop GTPase | (RefSeq) LOW QUALITY PROTEIN: uncharacterized protein LOC104799061	--	Protein tyrosine and serine/threonine kinase	G-type lectin S-receptor-like serine/threonine-protein kinase At4g27290 OS=Arabidopsis thaliana OX=3702 GN=At4g27290 PE=3 SV=4	Signal transduction mechanisms	hypothetical protein TEA_014511 [Camellia sinensis var. sinensis]		VaccDscaff3-augustus-gene-440.50	Signal transduction mechanisms	K01180|1.7e-46|cmax:111487562|K01180 endo-1,3(4)-beta-glucanase [EC:3.2.1.6] | (RefSeq) uncharacterized protein LOC111487562	--	Protein tyrosine and serine/threonine kinase	Probable LRR receptor-like serine/threonine-protein kinase At1g53430 OS=Arabidopsis thaliana OX=3702 GN=At1g53430 PE=1 SV=1	Signal transduction mechanisms	hypothetical protein C3L33_04542, partial [Rhododendron williamsianum]		VaccDscaff30-augustus-gene-312.21	--	K19476|2.7e-21|cic:CICLE_v10026997mg|K19476 vacuolar protein sorting-associated protein IST1 | (RefSeq) hypothetical protein	Endocytosis (ko04144)	Transmembrane amino acid transporter protein	Lysine histidine transporter 1 OS=Arabidopsis thaliana OX=3702 GN=LHT1 PE=1 SV=1	Amino acid transport and metabolism	hypothetical protein C3L33_01680, partial [Rhododendron williamsianum]
VaccDscaff41-augustus-gene-211.36		K01180|3.7e-128|cmax:111487562|K01180 endo-1,3(4)-beta-glucanase [EC:3.2.1.6] | (RefSeq) uncharacterized protein LOC111487562	--	Protein tyrosine and serine/threonine kinase	Proline-rich receptor-like protein kinase PERK1 OS=Arabidopsis thaliana OX=3702 GN=PERK1 PE=1 SV=1	Signal transduction mechanisms	hypothetical protein C3L33_05273, partial [Rhododendron williamsianum]		Vaccinium_corymbosum_newGene_8509	--	K09753|1.6e-30|zju:107408516|K09753 cinnamoyl-CoA reductase [EC:1.2.1.44] | (RefSeq) cinnamoyl-CoA reductase 1-like isoform X1	Phenylpropanoid biosynthesis (ko00940)	gag-polypeptide of LTR copia-type	Retrovirus-related Pol polyprotein from transposon RE1 OS=Arabidopsis thaliana OX=3702 GN=RE1 PE=2 SV=1	Replication, recombination and repair	uncharacterized protein LOC109724777 [Ananas comosus]		VaccDscaff4-snap-gene-124.34	Carbohydrate transport and metabolism	K13692|4.2e-109|bna:106352547|K13692 UDP-glucose:(indol-3-yl)acetate beta-D-glucosyltransferase [EC:2.4.1.121] | (RefSeq) UDP-glycosyltransferase 75D1-like	--	UDP-glucoronosyl and UDP-glucosyl transferase	Crocetin glucosyltransferase, chloroplastic OS=Gardenia jasminoides OX=114476 GN=UGT75L6 PE=1 SV=1	Function unknown	hypothetical protein F0562_035244 [Nyssa sinensis]
VaccDscaff13-augustus-gene-271.34	General function prediction only	K07897|7.9e-106|tcc:18607796|K07897 Ras-related protein Rab-7A | (RefSeq) ras-related protein Rab7	Endocytosis (ko04144);; Phagosome (ko04145)	Ras family	Ras-related protein Rab7 OS=Pisum sativum OX=3888 PE=2 SV=1	Intracellular trafficking, secretion, and vesicular transport	hypothetical protein Lal_00018960 [Lupinus albus]		VaccDscaff15-augustus-gene-198.30	Amino acid transport and metabolism;; Coenzyme transport and metabolism	K05907|6.3e-128|vvi:100853787|K05907 adenylyl-sulfate reductase (glutathione) [EC:1.8.4.9] | (RefSeq) 5'-adenylylsulfate reductase 3, chloroplastic-like	Sulfur metabolism (ko00920)	Phosphoadenosine phosphosulfate reductase family	5'-adenylylsulfate reductase 1, chloroplastic OS=Arabidopsis thaliana OX=3702 GN=APR1 PE=1 SV=2	--	hypothetical protein C3L33_23022, partial [Rhododendron williamsianum]		VaccDscaff513-augustus-gene-0.14	--	K13464|4.4e-28|nnu:104609287|K13464 jasmonate ZIM domain-containing protein | (RefSeq) protein TIFY 10a-like	Plant hormone signal transduction (ko04075)	tify domain	Protein TIFY 10A OS=Arabidopsis thaliana OX=3702 GN=TIFY10A PE=1 SV=1	Function unknown	hypothetical protein C3L33_00104, partial [Rhododendron williamsianum]
VaccDscaff40-augustus-gene-164.32	--	--	--	SPX domain	SPX domain-containing protein 3 OS=Arabidopsis thaliana OX=3702 GN=SPX3 PE=2 SV=1	Inorganic ion transport and metabolism	hypothetical protein C3L33_22591, partial [Rhododendron williamsianum]		VaccDscaff4-processed-gene-383.8	--	--	--	--	--	--	putative late blight resistance protein homolog R1A-3 [Camellia sinensis]		VaccDscaff36-augustus-gene-195.22	--	--	--	--	Protein LAZY 1 OS=Arabidopsis thaliana OX=3702 GN=LAZY1 PE=1 SV=1	Function unknown	protein LAZY 1-like isoform X2 [Camellia sinensis]
VaccDscaff46-snap-gene-92.39	--	K05391|7.2e-230|cit:102621236|K05391 cyclic nucleotide gated channel, plant | (RefSeq) protein CNGC15b-like	Plant-pathogen interaction (ko04626)	Ion transport protein	Putative cyclic nucleotide-gated ion channel 15 OS=Arabidopsis thaliana OX=3702 GN=CNGC15 PE=3 SV=1	--	hypothetical protein CUMW_036330 [Citrus unshiu]		VaccDscaff19-augustus-gene-136.33	Signal transduction mechanisms	K17500|1.7e-129|dosa:Os09t0459600-01|K17500 integrin-linked kinase-associated serine/threonine phosphatase 2C [EC:3.1.3.16] | (RefSeq) Os09g0459600; Similar to Calmodulin-binding protein phosphatase.	--	Protein phosphatase 2C	Probable protein phosphatase 2C 15 OS=Arabidopsis thaliana OX=3702 GN=At1g68410 PE=2 SV=1	Signal transduction mechanisms	hypothetical protein HYC85_015739 [Camellia sinensis]		VaccDscaff39-snap-gene-182.31	--	K12133|5.4e-238|vvi:100250535|K12133 MYB-related transcription factor LHY | (RefSeq) protein LHY	Circadian rhythm - plant (ko04712)	Myb-like DNA-binding domain	Protein LHY OS=Arabidopsis thaliana OX=3702 GN=LHY PE=1 SV=2	Transcription	hypothetical protein C3L33_04920, partial [Rhododendron williamsianum]
VaccDscaff28-augustus-gene-337.22	--	K01183|1.1e-101|dzi:111289795|K01183 chitinase [EC:3.2.1.14] | (RefSeq) hevamine-A-like	Amino sugar and nucleotide sugar metabolism (ko00520)	Glycosyl hydrolases family 18	Hevamine-A OS=Hevea brasiliensis OX=3981 PE=1 SV=2	Carbohydrate transport and metabolism	hypothetical protein C3L33_16382, partial [Rhododendron williamsianum]		VaccDscaff32-augustus-gene-18.28	Amino acid transport and metabolism	K18592|5.1e-265|qsu:112010419|K18592 gamma-glutamyltranspeptidase / glutathione hydrolase / leukotriene-C4 hydrolase [EC:2.3.2.2 3.4.19.13 3.4.19.14] | (RefSeq) glutathione hydrolase 3	Taurine and hypotaurine metabolism (ko00430);; Cyanoamino acid metabolism (ko00460);; Glutathione metabolism (ko00480);; Arachidonic acid metabolism (ko00590)	Gamma-glutamyltranspeptidase	Glutathione hydrolase 3 OS=Arabidopsis thaliana OX=3702 GN=GGT3 PE=2 SV=1	Amino acid transport and metabolism	Gamma-glutamyltranspeptidase [Actinidia chinensis var. chinensis]		VaccDscaff29-augustus-gene-27.41	--	K22382|9.6e-12|oeu:111408549|K22382 WD repeat-containing protein 26 | (RefSeq) WD repeat-containing protein 26 homolog	--	WRC	Growth-regulating factor 7 OS=Arabidopsis thaliana OX=3702 GN=GRF7 PE=2 SV=1	Transcription	hypothetical protein C3L33_03396, partial [Rhododendron williamsianum]
VaccDscaff5-processed-gene-395.5	--	K09286|1.6e-52|vvi:100243603|K09286 EREBP-like factor | (RefSeq) ethylene-responsive transcription factor-like	--	AP2 domain	Ethylene-responsive transcription factor 4 OS=Arabidopsis thaliana OX=3702 GN=ERF4 PE=1 SV=1	Transcription	hypothetical protein C3L33_11694, partial [Rhododendron williamsianum]		VaccDscaff4-augustus-gene-410.23	--	K09422|3.2e-74|tcc:18596211|K09422 transcription factor MYB, plant | (RefSeq) transcription factor TT2	--	Myb-like DNA-binding domain	Transcription factor MYB1 OS=Crocosmia x crocosmiiflora OX=1053288 GN=MYB1 PE=2 SV=1	Transcription	Transcription repressor like [Actinidia chinensis var. chinensis]		VaccDscaff34-augustus-gene-256.32	--	K23280|2.2e-114|ini:109161119|K23280 rhamnogalacturonan I rhamnosyltransferase [EC:2.4.1.351] | (RefSeq) uncharacterized protein At1g04910	--	GDP-fucose protein O-fucosyltransferase	O-fucosyltransferase 19 OS=Arabidopsis thaliana OX=3702 GN=OFUT19 PE=2 SV=1	Function unknown	hypothetical protein C3L33_20382, partial [Rhododendron williamsianum]
VaccDscaff1-processed-gene-304.19	--	--	--	Transport and Golgi organisation 2	--	Function unknown	transport and Golgi organization 2 homolog [Sesamum indicum]		VaccDscaff3-processed-gene-94.6	Posttranslational modification, protein turnover, chaperones	K00799|6.5e-135|pda:103697457|K00799 glutathione S-transferase [EC:2.5.1.18] | (RefSeq) uncharacterized protein LOC103697457	Glutathione metabolism (ko00480)	Glutathione S-transferase, N-terminal domain	Glutathione S-transferase U17 OS=Arabidopsis thaliana OX=3702 GN=GSTU17 PE=2 SV=1	Posttranslational modification, protein turnover, chaperones	uncharacterized protein LOC117920146 [Vitis riparia]		VaccDscaff8-snap-gene-222.34	--	--	--	Myb/SANT-like DNA-binding domain	--	Function unknown	hypothetical protein HYC85_021837 [Camellia sinensis]
VaccDscaff46-processed-gene-136.1	--	--	--	DVL family	--	--	--		VaccDscaff41-processed-gene-227.13	--	K22312|2.0e-99|gab:108485901|K22312 hydroxyjasmonate sulfotransferase [EC:2.8.2.39] | (RefSeq) flavonol sulfotransferase-like	--	Sulfotransferase domain	Cytosolic sulfotransferase 18 OS=Arabidopsis thaliana OX=3702 GN=SOT18 PE=1 SV=1	Coenzyme transport and metabolism	hypothetical protein C3L33_11988, partial [Rhododendron williamsianum]		VaccDscaff49-augustus-gene-28.31	Carbohydrate transport and metabolism	K01184|4.2e-30|cam:101508757|K01184 polygalacturonase [EC:3.2.1.15] | (RefSeq) probable polygalacturonase At3g15720	Pentose and glucuronate interconversions (ko00040)	Glycosyl hydrolases family 28	Probable polygalacturonase OS=Vitis vinifera OX=29760 GN=GSVIVT00026920001 PE=1 SV=1	Cell wall/membrane/envelope biogenesis	probable polygalacturonase [Camellia sinensis]
VaccDscaff17-snap-gene-335.37	Cell wall/membrane/envelope biogenesis	K09753|6.7e-159|nau:109218000|K09753 cinnamoyl-CoA reductase [EC:1.2.1.44] | (RefSeq) cinnamoyl-CoA reductase 1-like	Phenylpropanoid biosynthesis (ko00940)	NAD dependent epimerase/dehydratase family	Cinnamoyl-CoA reductase 1 OS=Arabidopsis thaliana OX=3702 GN=CCR1 PE=1 SV=1	Defense mechanisms	hypothetical protein HYC85_004424 [Camellia sinensis]		VaccDscaff31-augustus-gene-163.16	Function unknown	K07192|3.8e-178|jcu:105637592|K07192 flotillin | (RefSeq) flotillin-like protein 4	--	SPFH domain / Band 7 family	Flotillin-like protein 4 OS=Medicago truncatula OX=3880 GN=FLOT4 PE=2 SV=1	--	Flotillin [Parasponia andersonii]		VaccDscaff35-augustus-gene-117.32	Lipid transport and metabolism;; General function prediction only	K00679|2.9e-66|cic:CICLE_v10027727mg|K00679 phospholipid:diacylglycerol acyltransferase [EC:2.3.1.158] | (RefSeq) hypothetical protein	Glycerolipid metabolism (ko00561)	GDSL-like Lipase/Acylhydrolase	GDSL esterase/lipase At5g45960 OS=Arabidopsis thaliana OX=3702 GN=At5g45960 PE=2 SV=1	Function unknown	GDSL esterase/lipase At5g45960-like [Camellia sinensis]
VaccDscaff29-augustus-gene-242.23	Function unknown	K16280|8.5e-42|csat:104750588|K16280 E3 ubiquitin-protein ligase RGLG [EC:2.3.2.27] | (RefSeq) E3 ubiquitin-protein ligase RGLG2-like isoform X1	--	GDSL-like Lipase/Acylhydrolase	GDSL esterase/lipase At5g03610 OS=Arabidopsis thaliana OX=3702 GN=At5g03610 PE=2 SV=1	Function unknown	GDSL esterase/lipase At5g03610-like isoform X1 [Camellia sinensis]		VaccDscaff42-processed-gene-227.8	--	K22985|8.4e-87|var:108326472|K22985 G protein-coupled receptor 107 | (RefSeq) protein GPR107-like	--	Lung seven transmembrane receptor	Protein CANDIDATE G-PROTEIN COUPLED RECEPTOR 7 OS=Arabidopsis thaliana OX=3702 GN=CAND7 PE=2 SV=1	Signal transduction mechanisms	hypothetical protein C3L33_22793, partial [Rhododendron williamsianum]		VaccDscaff22-snap-gene-269.34	Secondary metabolites biosynthesis, transport and catabolism;; Defense mechanisms	K23136|3.0e-271|gra:105769156|K23136 fraxetin 5-hydroxylase [EC:1.14.14.164] | (RefSeq) uncharacterized LOC105769156	--	Cytochrome P450	Xanthotoxin 5-hydroxylase CYP82C4 OS=Arabidopsis thaliana OX=3702 GN=CYP82C4 PE=1 SV=1	Secondary metabolites biosynthesis, transport and catabolism	hypothetical protein CUMW_049080 [Citrus unshiu]
VaccDscaff1-augustus-gene-416.35	Amino acid transport and metabolism	K00815|2.6e-191|jcu:105637437|K00815 tyrosine aminotransferase [EC:2.6.1.5] | (RefSeq) probable aminotransferase TAT2	Ubiquinone and other terpenoid-quinone biosynthesis (ko00130);; Cysteine and methionine metabolism (ko00270);; Tyrosine metabolism (ko00350);; Phenylalanine metabolism (ko00360);; Phenylalanine, tyrosine and tryptophan biosynthesis (ko00400);; Isoquinoline alkaloid biosynthesis (ko00950);; Tropane, piperidine and pyridine alkaloid biosynthesis (ko00960)	Aminotransferase class I and II	Probable aminotransferase TAT2 OS=Arabidopsis thaliana OX=3702 GN=At5g53970 PE=2 SV=1	Amino acid transport and metabolism	aromatic amino acid aminotransferase 1 [Camellia sinensis]		VaccDscaff36-augustus-gene-172.19	--	K20456|0.0e+00|jcu:105644710|K20456 oxysterol-binding protein 1 | (RefSeq) oxysterol-binding protein-related protein 1D	--	Oxysterol-binding protein	Oxysterol-binding protein-related protein 1D OS=Arabidopsis thaliana OX=3702 GN=ORP1D PE=2 SV=1	Signal transduction mechanisms	hypothetical protein C3L33_13924, partial [Rhododendron williamsianum]		VaccDscaff20-processed-gene-132.14	--	--	--	--	--	Function unknown	hypothetical protein C3L33_17097, partial [Rhododendron williamsianum]
VaccDscaff23-processed-gene-250.2	--	K00020|5.0e-22|mtr:MTR_8g088900|K00020 3-hydroxyisobutyrate dehydrogenase [EC:1.1.1.31] | (RefSeq) 6-phosphogluconate dehydrogenase-like protein	Valine, leucine and isoleucine degradation (ko00280)	Phosphate-induced protein 1 conserved region	Protein PHOSPHATE-INDUCED 1 OS=Nicotiana tabacum OX=4097 GN=PHI-1 PE=2 SV=1	Replication, recombination and repair	hypothetical protein C3L33_10694, partial [Rhododendron williamsianum]		VaccDscaff33-snap-gene-98.23	--	K13459|2.2e-102|vvi:104880792|K13459 disease resistance protein RPS2 | (RefSeq) probable disease resistance protein At4g27220	Plant-pathogen interaction (ko04626)	NB-ARC domain	Disease resistance protein RFL1 OS=Arabidopsis thaliana OX=3702 GN=RFL1 PE=3 SV=2	Signal transduction mechanisms	Disease resistance protein [Actinidia chinensis var. chinensis]		VaccDscaff36-processed-gene-254.5	--	K23460|1.7e-06|cam:101497150|K23460 Rab proteins geranylgeranyltransferase component A | (RefSeq) uncharacterized LOC101497150	--	RWP-RK domain	Protein NLP7 OS=Arabidopsis thaliana OX=3702 GN=NLP7 PE=1 SV=2	Function unknown	protein NLP3-like [Camellia sinensis]
VaccDscaff10-snap-gene-65.37	Secondary metabolites biosynthesis, transport and catabolism;; Defense mechanisms	K09754|6.7e-257|jcu:105636120|K09754 5-O-(4-coumaroyl)-D-quinate 3'-monooxygenase [EC:1.14.14.96] | (RefSeq) cytochrome P450 98A2	Phenylpropanoid biosynthesis (ko00940);; Flavonoid biosynthesis (ko00941);; Stilbenoid, diarylheptanoid and gingerol biosynthesis (ko00945)	Cytochrome P450	Cytochrome P450 98A2 OS=Glycine max OX=3847 GN=CYP98A2 PE=2 SV=1	Secondary metabolites biosynthesis, transport and catabolism	cytochrome P450 [Striga asiatica]		Vaccinium_corymbosum_newGene_14009	--	--	--	--	Protein AE7-like 1 OS=Arabidopsis thaliana OX=3702 GN=AEL1 PE=3 SV=1	Function unknown	protein AE7-like 1 [Camellia sinensis]		VaccDscaff4-augustus-gene-305.16	General function prediction only	K03549|4.5e-105|csat:104769726|K03549 KUP system potassium uptake protein | (RefSeq) potassium transporter 8-like isoform X1	--	NHL repeat	--	Function unknown	NHL repeat-containing protein [Actinidia chinensis var. chinensis]
VaccDscaff41-augustus-gene-226.41	Inorganic ion transport and metabolism	K11816|1.1e-140|vvi:100251223|K11816 indole-3-pyruvate monooxygenase [EC:1.14.13.168] | (RefSeq) probable indole-3-pyruvate monooxygenase YUCCA10	Tryptophan metabolism (ko00380)	Flavin-binding monooxygenase-like	Probable indole-3-pyruvate monooxygenase YUCCA10 OS=Arabidopsis thaliana OX=3702 GN=YUC10 PE=2 SV=1	Secondary metabolites biosynthesis, transport and catabolism	Indole-3-pyruvate monooxygenase YUCCA10 [Actinidia chinensis var. chinensis]		VaccDscaff9-augustus-gene-164.26	--	--	--	--	Protein E6 OS=Gossypium hirsutum OX=3635 GN=E6 PE=2 SV=1	--	hypothetical protein C3L33_15548, partial [Rhododendron williamsianum]		VaccDscaff35-snap-gene-298.27	--	--	--	--	Protein POST-ILLUMINATION CHLOROPHYLL FLUORESCENCE INCREASE, chloroplastic OS=Arabidopsis thaliana OX=3702 GN=PIFI PE=2 SV=1	Function unknown	uncharacterized protein LOC114284282 [Camellia sinensis]
VaccDscaff3-processed-gene-193.2	Signal transduction mechanisms	K10260|9.4e-18|csl:COCSUDRAFT_23114|K10260 F-box and WD-40 domain protein 7 | (RefSeq) WD40 repeat-like protein	Ubiquitin mediated proteolysis (ko04120)	U-box domain	U-box domain-containing protein 6 OS=Arabidopsis thaliana OX=3702 GN=PUB6 PE=2 SV=2	Function unknown	hypothetical protein C3L33_13373, partial [Rhododendron williamsianum]		VaccDscaff26-processed-gene-224.1		K00924|1.4e-102|ini:109185417|K00924 kinase [EC:2.7.1.-] | (RefSeq) probable receptor-like protein kinase At5g47070	--	Protein kinase domain	Serine/threonine-protein kinase PCRK1 OS=Arabidopsis thaliana OX=3702 GN=PCRK1 PE=1 SV=1	Signal transduction mechanisms	hypothetical protein C3L33_02640, partial [Rhododendron williamsianum]		VaccDscaff36-snap-gene-2.40	--	K10418|4.9e-36|nau:109228825|K10418 dynein light chain LC8-type | (RefSeq) dynein light chain LC6, flagellar outer arm-like	--	Dynein light chain type 1	--	Function unknown	hypothetical protein C3L33_14642, partial [Rhododendron williamsianum]
VaccDscaff40-augustus-gene-172.26	--	--	--	Plastocyanin-like domain	--	Function unknown	hypothetical protein C3L33_23429, partial [Rhododendron williamsianum]		VaccDscaff40-snap-gene-195.20	--	K08237|1.1e-176|nsy:104233921|K08237 hydroquinone glucosyltransferase [EC:2.4.1.218] | (RefSeq) hydroquinone glucosyltransferase-like	--	UDP-glucoronosyl and UDP-glucosyl transferase	Hydroquinone glucosyltransferase OS=Rauvolfia serpentina OX=4060 GN=AS PE=1 SV=1	--	hypothetical protein C3L33_22757, partial [Rhododendron williamsianum]		VaccDscaff33-augustus-gene-309.26	--	K22048|1.8e-235|tcc:18588316|K22048 mechanosensitive ion channel protein 4/5/6/7/8/9/10 | (RefSeq) mechanosensitive ion channel protein 10	--	Mechanosensitive ion channel	Mechanosensitive ion channel protein 10 OS=Arabidopsis thaliana OX=3702 GN=MSL10 PE=1 SV=1	Cell wall/membrane/envelope biogenesis	hypothetical protein C3L33_03534, partial [Rhododendron williamsianum]
VaccDscaff2-processed-gene-405.26	--	--	--	--	--	--	uncharacterized protein LOC114261122 [Camellia sinensis]		VaccDscaff31-snap-gene-59.32	Energy production and conversion	K01455|9.5e-248|tcc:18611267|K01455 formamidase [EC:3.5.1.49] | (RefSeq) formamidase	Cyanoamino acid metabolism (ko00460);; Glyoxylate and dicarboxylate metabolism (ko00630);; Nitrogen metabolism (ko00910);; Carbon metabolism (ko01200)	Acetamidase/Formamidase family	--	Energy production and conversion	uncharacterized protein LOC114318165 isoform X1 [Camellia sinensis]		VaccDscaff9-augustus-gene-382.44	--	--	--	--	Protein POST-ILLUMINATION CHLOROPHYLL FLUORESCENCE INCREASE, chloroplastic OS=Arabidopsis thaliana OX=3702 GN=PIFI PE=2 SV=1	Function unknown	uncharacterized protein LOC114284282 [Camellia sinensis]
VaccDscaff88-processed-gene-4.1	--	K00430|6.8e-123|ccav:112522938|K00430 peroxidase [EC:1.11.1.7] | (RefSeq) lignin-forming anionic peroxidase-like	Phenylpropanoid biosynthesis (ko00940)	Peroxidase	Lignin-forming anionic peroxidase OS=Nicotiana sylvestris OX=4096 PE=2 SV=1	Secondary metabolites biosynthesis, transport and catabolism	Lignin-forming anionic peroxidase [Actinidia chinensis var. chinensis]		VaccDscaff9-processed-gene-178.3	--	K13413|1.5e-50|sbi:110435403|K13413 mitogen-activated protein kinase kinase 4/5 [EC:2.7.12.2] | (RefSeq) mitogen-activated protein kinase kinase 5-like	MAPK signaling pathway - plant (ko04016);; Plant hormone signal transduction (ko04075);; Plant-pathogen interaction (ko04626)	Protein of unknown function (DUF640)	Protein LIGHT-DEPENDENT SHORT HYPOCOTYLS 10 OS=Arabidopsis thaliana OX=3702 GN=LSH10 PE=1 SV=1	Function unknown	hypothetical protein C3L33_22942, partial [Rhododendron williamsianum]		VaccDscaff9-processed-gene-82.21	Carbohydrate transport and metabolism	K13692|9.3e-118|thj:104820429|K13692 UDP-glucose:(indol-3-yl)acetate beta-D-glucosyltransferase [EC:2.4.1.121] | (RefSeq) UDP-glycosyltransferase 75D1	--	UDP-glucoronosyl and UDP-glucosyl transferase	Crocetin glucosyltransferase, chloroplastic OS=Gardenia jasminoides OX=114476 GN=UGT75L6 PE=1 SV=1	Function unknown	hypothetical protein HYC85_019638 [Camellia sinensis]
VaccDscaff30-snap-gene-249.19	Coenzyme transport and metabolism	K14487|4.4e-293|rcu:8285613|K14487 auxin responsive GH3 gene family | (RefSeq) probable indole-3-acetic acid-amido synthetase GH3.1	Plant hormone signal transduction (ko04075)	GH3 auxin-responsive promoter	Probable indole-3-acetic acid-amido synthetase GH3.1 OS=Arabidopsis thaliana OX=3702 GN=GH3.1 PE=2 SV=1	Function unknown	Indole-3-acetic acid-amido synthetase [Actinidia chinensis var. chinensis]		VaccDscaff22-augustus-gene-329.39	General function prediction only	K20728|1.1e-41|thj:104814965|K20728 vegetative storage protein 2 | (RefSeq) vegetative storage protein 2-like	MAPK signaling pathway - plant (ko04016)	HAD superfamily, subfamily IIIB (Acid phosphatase)	Acid phosphatase 1 OS=Solanum lycopersicum OX=4081 GN=APS1 PE=2 SV=1	Function unknown	hypothetical protein C3L33_04267, partial [Rhododendron williamsianum]		VaccDscaff29-augustus-gene-47.23	Defense mechanisms	K05666|0.0e+00|qsu:112020205|K05666 ATP-binding cassette, subfamily C (CFTR/MRP), member 2 | (RefSeq) ABC transporter C family member 10-like	ABC transporters (ko02010)	ABC transporter	ABC transporter C family member 10 OS=Arabidopsis thaliana OX=3702 GN=ABCC10 PE=2 SV=2	Defense mechanisms	hypothetical protein C3L33_03302, partial [Rhododendron williamsianum]
VaccDscaff302-augustus-gene-0.32	Secondary metabolites biosynthesis, transport and catabolism;; Defense mechanisms	K00487|6.6e-274|gab:108486152|K00487 trans-cinnamate 4-monooxygenase [EC:1.14.14.91] | (RefSeq) trans-cinnamate 4-monooxygenase	Ubiquinone and other terpenoid-quinone biosynthesis (ko00130);; Phenylpropanoid biosynthesis (ko00940);; Flavonoid biosynthesis (ko00941);; Stilbenoid, diarylheptanoid and gingerol biosynthesis (ko00945)	Cytochrome P450	Trans-cinnamate 4-monooxygenase OS=Catharanthus roseus OX=4058 GN=CYP73A4 PE=2 SV=1	Secondary metabolites biosynthesis, transport and catabolism	cinnamate 4-hydroxylase [Vaccinium corymbosum]		VaccDscaff23-snap-gene-1.23	--	--	--	Histidine kinase-, DNA gyrase B-, and HSP90-like ATPase	Protein MICRORCHIDIA 2 OS=Arabidopsis thaliana OX=3702 GN=MORC2 PE=1 SV=1	Cell cycle control, cell division, chromosome partitioning	hypothetical protein F0562_003694 [Nyssa sinensis]		VaccDscaff39-snap-gene-183.34	General function prediction only	--	--	Protein of unknown function (DUF1295)	--	Function unknown	hypothetical protein C3L33_04914, partial [Rhododendron williamsianum]
VaccDscaff20-augustus-gene-135.36		K13416|1.8e-52|ccaj:109804867|K13416 brassinosteroid insensitive 1-associated receptor kinase 1 [EC:2.7.10.1 2.7.11.1] | (RefSeq) BRASSINOSTEROID INSENSITIVE 1-associated receptor kinase 1-like	MAPK signaling pathway - plant (ko04016);; Plant hormone signal transduction (ko04075);; Plant-pathogen interaction (ko04626)	Protein kinase domain	Protein SUPPRESSOR OF NPR1-1 CONSTITUTIVE 4 OS=Arabidopsis thaliana OX=3702 GN=LRK10L-2.6 PE=1 SV=1	Signal transduction mechanisms	rust resistance kinase Lr10-like [Camellia sinensis]		VaccDscaff19-augustus-gene-374.28	--	K14484|7.9e-71|nsy:104216164|K14484 auxin-responsive protein IAA | (RefSeq) auxin-induced protein 22D-like	Plant hormone signal transduction (ko04075)	AUX/IAA family	Auxin-induced protein 22D OS=Vigna radiata var. radiata OX=3916 GN=AUX22D PE=2 SV=1	Transcription	auxin-induced protein 22D-like [Camellia sinensis]		VaccDscaff75-processed-gene-2.3	--	K01285|1.5e-236|hbr:110652170|K01285 lysosomal Pro-X carboxypeptidase [EC:3.4.16.2] | (RefSeq) lysosomal Pro-X carboxypeptidase	--	Serine carboxypeptidase S28	Probable serine protease EDA2 OS=Arabidopsis thaliana OX=3702 GN=EDA2 PE=2 SV=2	Function unknown	lysosomal Pro-X carboxypeptidase [Camellia sinensis]
VaccDscaff50-augustus-gene-25.28	--	--	--	--	--	--	Glutamyl-tRNA(Gln) amidotransferase subunit D like [Actinidia chinensis var. chinensis]		VaccDscaff13-augustus-gene-41.30	--	--	--	--	--	Function unknown	hypothetical protein HYC85_005988 [Camellia sinensis]		VaccDscaff39-processed-gene-2.0	--	K12930|1.5e-160|dcr:108213096|K12930 anthocyanidin 3-O-glucosyltransferase [EC:2.4.1.115] | (RefSeq) kaempferol 3-O-beta-D-galactosyltransferase-like	Anthocyanin biosynthesis (ko00942)	UDP-glucoronosyl and UDP-glucosyl transferase	Anthocyanidin 3-O-galactosyltransferase F3GT1 OS=Actinidia chinensis var. chinensis OX=1590841 GN=F3GT1 PE=1 SV=1	Function unknown	UDP-glucose: flavonoid 3-O-glucosyltransferase [Vaccinium corymbosum]
VaccDscaff19-augustus-gene-258.50	Signal transduction mechanisms	K24104|1.1e-83|thj:104799061|K24104 GPN-loop GTPase | (RefSeq) LOW QUALITY PROTEIN: uncharacterized protein LOC104799061	--	Protein tyrosine and serine/threonine kinase	Cysteine-rich receptor-like protein kinase 10 OS=Arabidopsis thaliana OX=3702 GN=CRK10 PE=1 SV=3	Signal transduction mechanisms	cysteine-rich receptor-like protein kinase 25 [Camellia sinensis]		VaccDscaff12-augustus-gene-153.18	Translation, ribosomal structure and biogenesis	K06174|4.3e-276|mesc:110613531|K06174 ATP-binding cassette, sub-family E, member 1 | (RefSeq) ABC transporter E family member 2	--	ABC transporter	ABC transporter E family member 2 OS=Arabidopsis thaliana OX=3702 GN=ABCE2 PE=2 SV=1	RNA processing and modification	hypothetical protein C3L33_02471, partial [Rhododendron williamsianum]		VaccDscaff11-augustus-gene-333.39	--	K20628|1.3e-105|sind:105166984|K20628 expansin | (RefSeq) expansin-A2	--	Expansin C-terminal domain	Expansin-A4 OS=Arabidopsis thaliana OX=3702 GN=EXPA4 PE=1 SV=1	Carbohydrate transport and metabolism	Expansin-A4 like [Actinidia chinensis var. chinensis]
VaccDscaff43-processed-gene-4.5	Signal transduction mechanisms	--	--	CP12 domain	Calvin cycle protein CP12-1, chloroplastic OS=Arabidopsis thaliana OX=3702 GN=CP12-1 PE=1 SV=1	Function unknown	hypothetical protein C3L33_03972, partial [Rhododendron williamsianum]		VaccDscaff35-snap-gene-74.43	--	K08286|1.2e-56|peq:110035740|K08286 protein-serine/threonine kinase [EC:2.7.11.-] | (RefSeq) serine/threonine-protein kinase D6PK-like	--	Protein kinase domain	Serine/threonine-protein kinase D6PKL2 OS=Arabidopsis thaliana OX=3702 GN=D6PKL2 PE=1 SV=1	Signal transduction mechanisms	Serine/threonine-protein kinase [Actinidia chinensis var. chinensis]		VaccDscaff27-augustus-gene-263.23	Lipid transport and metabolism;; General function prediction only	K01206|1.1e-34|thj:104825554|K01206 alpha-L-fucosidase [EC:3.2.1.51] | (RefSeq) alpha-L-fucosidase 3	Other glycan degradation (ko00511)	GDSL-like Lipase/Acylhydrolase	GDSL esterase/lipase At3g48460 OS=Arabidopsis thaliana OX=3702 GN=At3g48460 PE=2 SV=1	Function unknown	hypothetical protein C3L33_00582, partial [Rhododendron williamsianum]
VaccDscaff30-augustus-gene-338.27	Carbohydrate transport and metabolism	K01184|7.9e-182|pmum:103329840|K01184 polygalacturonase [EC:3.2.1.15] | (RefSeq) polygalacturonase At1g48100	Pentose and glucuronate interconversions (ko00040)	Glycosyl hydrolases family 28	Polygalacturonase At1g48100 OS=Arabidopsis thaliana OX=3702 GN=At1g48100 PE=2 SV=1	Carbohydrate transport and metabolism	hypothetical protein C3L33_01609, partial [Rhododendron williamsianum]		VaccDscaff33-augustus-gene-253.38	--	--	--	--	BAG family molecular chaperone regulator 7 OS=Arabidopsis thaliana OX=3702 GN=BAG7 PE=1 SV=1	Function unknown	BAG family molecular chaperone regulator like [Actinidia chinensis var. chinensis]		VaccDscaff6-augustus-gene-28.34	Carbohydrate transport and metabolism	K06617|1.1e-137|oeu:111378616|K06617 raffinose synthase [EC:2.4.1.82] | (RefSeq) probable galactinol--sucrose galactosyltransferase 1	Galactose metabolism (ko00052)	Raffinose synthase or seed imbibition protein Sip1	Probable galactinol--sucrose galactosyltransferase 1 OS=Arabidopsis thaliana OX=3702 GN=RFS1 PE=2 SV=1	Function unknown	probable galactinol--sucrose galactosyltransferase 1 [Camellia sinensis]
VaccDscaff3-processed-gene-222.8	--	K09286|2.2e-19|vra:106767271|K09286 EREBP-like factor | (RefSeq) ethylene-responsive transcription factor ERF010	--	AP2 domain	Ethylene-responsive transcription factor ERF019 OS=Arabidopsis thaliana OX=3702 GN=ERF019 PE=2 SV=1	Transcription	hypothetical protein C3L33_13186, partial [Rhododendron williamsianum]		VaccDscaff78-processed-gene-3.7	--	K14488|2.5e-42|nau:109234004|K14488 SAUR family protein | (RefSeq) auxin-responsive protein SAUR71-like	Plant hormone signal transduction (ko04075)	Auxin responsive protein	Auxin-responsive protein SAUR72 OS=Arabidopsis thaliana OX=3702 GN=SAUR72 PE=1 SV=1	Function unknown	Auxin-responsive protein [Actinidia chinensis var. chinensis]		VaccDscaff32-augustus-gene-78.27	Posttranslational modification, protein turnover, chaperones	K15333|5.3e-89|nsy:104224633|K15333 tRNA guanosine-2'-O-methyltransferase [EC:2.1.1.34] | (RefSeq) uncharacterized protein LOC104224633	--	Subtilase family	Subtilisin-like protease SBT1.6 OS=Arabidopsis thaliana OX=3702 GN=SBT1.6 PE=2 SV=1	Posttranslational modification, protein turnover, chaperones	Subtilisin-like protease [Actinidia chinensis var. chinensis]
VaccDscaff24-processed-gene-122.11	Secondary metabolites biosynthesis, transport and catabolism	K09840|8.0e-263|sind:105175729|K09840 9-cis-epoxycarotenoid dioxygenase [EC:1.13.11.51] | (RefSeq) probable 9-cis-epoxycarotenoid dioxygenase NCED5, chloroplastic	Carotenoid biosynthesis (ko00906)	Retinal pigment epithelial membrane protein	9-cis-epoxycarotenoid dioxygenase NCED2, chloroplastic OS=Solanum lycopersicum OX=4081 GN=NCED2 PE=2 SV=1	Secondary metabolites biosynthesis, transport and catabolism	hypothetical protein C3L33_06707, partial [Rhododendron williamsianum]		VaccDscaff2-augustus-gene-408.35	--	K14505|2.8e-118|pmum:103335336|K14505 cyclin D3, plant | (RefSeq) cyclin-D3-1	Plant hormone signal transduction (ko04075)	Cyclin, N-terminal domain	Cyclin-D3-1 OS=Arabidopsis thaliana OX=3702 GN=CYCD3-1 PE=1 SV=3	Cell cycle control, cell division, chromosome partitioning	hypothetical protein C3L33_20939, partial [Rhododendron williamsianum]		VaccDscaff21-snap-gene-120.36	Inorganic ion transport and metabolism	K00522|2.3e-102|spen:107020362|K00522 ferritin heavy chain [EC:1.16.3.2] | (RefSeq) ferritin-2, chloroplastic	--	Ferritin-like domain	Ferritin-3, chloroplastic OS=Glycine max OX=3847 PE=2 SV=1	Inorganic ion transport and metabolism	ferritin-3, chloroplastic-like [Camellia sinensis]
VaccDscaff22-processed-gene-101.6	--	--	--	--	--	--	hypothetical protein C1H46_040301 [Malus baccata]		VaccDscaff29-snap-gene-226.38	--	--	--	HEAT repeat	Protein SHOOT GRAVITROPISM 6 OS=Arabidopsis thaliana OX=3702 GN=SGR6 PE=2 SV=1	Function unknown	Protein SHOOT GRAVITROPISM like [Actinidia chinensis var. chinensis]		VaccDscaff4-processed-gene-343.10	--	K23260|1.9e-70|atr:18438282|K23260 scopoletin glucosyltransferase [EC:2.4.1.128] | (RefSeq) scopoletin glucosyltransferase	Phenylpropanoid biosynthesis (ko00940)	UDP-glucoronosyl and UDP-glucosyl transferase	UDP-glycosyltransferase 89B2 OS=Stevia rebaudiana OX=55670 GN=UGT89B2 PE=2 SV=1	Function unknown	UDP-glycosyltransferase 89B2-like [Camellia sinensis]
VaccDscaff13-augustus-gene-42.45	--	--	--	Uncharacterised protein family (UPF0183)	UPF0183 protein At3g51130 OS=Arabidopsis thaliana OX=3702 GN=At3g51130 PE=1 SV=2	Function unknown	UPF0183 protein At3g51130-like [Camellia sinensis]		VaccDscaff28-augustus-gene-57.28	--	K22683|3.9e-74|smo:SELMODRAFT_124369|K22683 aspartyl protease family protein [EC:3.4.23.-] | (RefSeq) hypothetical protein	--	Xylanase inhibitor N-terminal	Aspartyl protease family protein At5g10770 OS=Arabidopsis thaliana OX=3702 GN=At5g10770 PE=2 SV=1	Posttranslational modification, protein turnover, chaperones	aspartyl protease family protein At5g10770-like [Camellia sinensis]		VaccDscaff12-augustus-gene-164.18	--	K03097|5.2e-18|aip:107632886|K03097 casein kinase II subunit alpha [EC:2.7.11.1] | (RefSeq) casein kinase II subunit alpha-like isoform X3	Ribosome biogenesis in eukaryotes (ko03008);; Circadian rhythm - plant (ko04712)	Protein of unknown function (DUF642)	--	Function unknown	hypothetical protein F0562_018732 [Nyssa sinensis]
VaccDscaff18-snap-gene-180.19	--	K19589|3.9e-08|zma:100283871|K19589 release factor glutamine methyltransferase [EC:2.1.1.297] | (RefSeq) uncharacterized protein LOC100283871	--	Homeobox KN domain	Homeobox protein knotted-1-like 3 OS=Malus domestica OX=3750 PE=2 SV=1	Transcription	hypothetical protein C3L33_07826, partial [Rhododendron williamsianum]		VaccDscaff31-processed-gene-307.25	--	K13453|5.8e-91|nto:104110459|K13453 disease resistance protein | (RefSeq) late blight resistance protein R1-A-like isoform X1	Plant-pathogen interaction (ko04626)	NB-ARC domain	Putative late blight resistance protein homolog R1A-10 OS=Solanum demissum OX=50514 GN=R1A-10 PE=3 SV=1	Signal transduction mechanisms	hypothetical protein F0562_034369 [Nyssa sinensis]		VaccDscaff48-processed-gene-81.3	--	K13496|3.2e-22|atr:18422858|K13496 UDP-glucosyltransferase 73C [EC:2.4.1.-] | (RefSeq) scopoletin glucosyltransferase	Zeatin biosynthesis (ko00908)	--	--	Function unknown	hypothetical protein C3L33_16421, partial [Rhododendron williamsianum]
VaccDscaff10-processed-gene-329.3	--	--	--	Leucine rich repeat	Leucine-rich repeat extensin-like protein 6 OS=Arabidopsis thaliana OX=3702 GN=LRX6 PE=2 SV=1	Function unknown	hypothetical protein C3L33_12713, partial [Rhododendron williamsianum]		VaccDscaff46-processed-gene-142.20	Posttranslational modification, protein turnover, chaperones	K13993|4.0e-68|dzi:111301353|K13993 HSP20 family protein | (RefSeq) 17.3 kDa class I heat shock protein-like	Protein processing in endoplasmic reticulum (ko04141)	Hsp20/alpha crystallin family	18.5 kDa class I heat shock protein OS=Glycine max OX=3847 GN=HSP18.5-C PE=3 SV=1	Posttranslational modification, protein turnover, chaperones	--		VaccDscaff12-augustus-gene-49.15	--	K14209|3.6e-28|ats:109773794|K14209 solute carrier family 36 (proton-coupled amino acid transporter) | (RefSeq) uncharacterized protein LOC109773794	--	GDSL-like Lipase/Acylhydrolase	GDSL esterase/lipase EXL1 OS=Arabidopsis thaliana OX=3702 GN=EXL1 PE=2 SV=1	Function unknown	hypothetical protein C3L33_11175, partial [Rhododendron williamsianum]
VaccDscaff10-augustus-gene-385.38	--	K19891|7.1e-52|smo:SELMODRAFT_442025|K19891 glucan endo-1,3-beta-glucosidase 1/2/3 [EC:3.2.1.39] | (RefSeq) hypothetical protein	Starch and sucrose metabolism (ko00500)	Glycosyl hydrolases family 17	Lichenase OS=Nicotiana plumbaginifolia OX=4092 GN=GN1 PE=2 SV=3	Carbohydrate transport and metabolism	hypothetical protein C3L33_12968, partial [Rhododendron williamsianum]		VaccDscaff55-snap-gene-10.26	--	K07942|4.2e-69|oeu:111391441|K07942 ADP-ribosylation factor-like protein 1 | (RefSeq) ADP-ribosylation factor 1-like	--	ADP-ribosylation factor family	ADP-ribosylation factor 1 OS=Brassica rapa subsp. pekinensis OX=51351 GN=ARF1 PE=2 SV=3	Intracellular trafficking, secretion, and vesicular transport	hypothetical protein DVH24_015503 [Malus domestica]		VaccDscaff4-augustus-gene-328.29	Lipid transport and metabolism	K05929|9.6e-254|hbr:110637755|K05929 phosphoethanolamine N-methyltransferase [EC:2.1.1.103] | (RefSeq) phosphomethylethanolamine N-methyltransferase	Glycerophospholipid metabolism (ko00564)	Methyltransferase domain	Phosphomethylethanolamine N-methyltransferase OS=Arabidopsis thaliana OX=3702 GN=NMT2 PE=1 SV=2	Function unknown	Phosphomethylethanolamine N-methyltransferase [Actinidia chinensis var. chinensis]
VaccDscaff337-processed-gene-0.11	--	--	--	--	--	--	leucine-rich repeat extensin-like protein 1 [Camellia sinensis]		VaccDscaff62-processed-gene-4.7	--	K14488|4.3e-42|nau:109234004|K14488 SAUR family protein | (RefSeq) auxin-responsive protein SAUR71-like	Plant hormone signal transduction (ko04075)	Auxin responsive protein	Auxin-responsive protein SAUR72 OS=Arabidopsis thaliana OX=3702 GN=SAUR72 PE=1 SV=1	Function unknown	Auxin-responsive protein [Actinidia chinensis var. chinensis]		VaccDscaff32-augustus-gene-315.40	--	--	--	CCT motif	Zinc finger protein CONSTANS-LIKE 15 OS=Arabidopsis thaliana OX=3702 GN=COL15 PE=1 SV=1	Function unknown	hypothetical protein C3L33_22008, partial [Rhododendron williamsianum]
VaccDscaff17-augustus-gene-253.28	Amino acid transport and metabolism	K14638|2.1e-138|cmax:111493070|K14638 solute carrier family 15 (peptide/histidine transporter), member 3/4 | (RefSeq) protein NRT1/ PTR FAMILY 2.13-like	--	POT family	Protein NRT1/ PTR FAMILY 2.10 OS=Arabidopsis thaliana OX=3702 GN=NPF2.10 PE=1 SV=3	Amino acid transport and metabolism	hypothetical protein HYC85_029782 [Camellia sinensis]		VaccDscaff2-snap-gene-327.22	Posttranslational modification, protein turnover, chaperones	K09510|1.7e-09|ats:109777754|K09510 DnaJ homolog subfamily B member 4 | (RefSeq) LOC109777754; dnaJ homolog subfamily B member 4-like	--	DnaJ domain	DnaJ protein P58IPK homolog OS=Arabidopsis thaliana OX=3702 GN=P58IPK PE=1 SV=1	Posttranslational modification, protein turnover, chaperones	hypothetical protein C3L33_21462, partial [Rhododendron williamsianum]		VaccDscaff48-processed-gene-98.4	--	K13434|4.7e-32|pop:7494656|K13434 pathogenesis-related genes transcriptional activator PTI6 | (RefSeq) pathogenesis-related genes transcriptional activator PTI6	Plant-pathogen interaction (ko04626)	AP2 domain	Ethylene-responsive transcription factor CRF4 OS=Arabidopsis thaliana OX=3702 GN=CRF4 PE=1 SV=2	Transcription	hypothetical protein C3L33_16376, partial [Rhododendron williamsianum]
VaccDscaff31-processed-gene-19.4	--	K03327|6.1e-30|nta:107781954|K03327 multidrug resistance protein, MATE family | (RefSeq) protein DETOXIFICATION 14-like	--	Domain of unknown function (DUF4228)	--	Function unknown	hypothetical protein C3L33_18616, partial [Rhododendron williamsianum]		VaccDscaff51-augustus-gene-4.27	Carbohydrate transport and metabolism	K06611|0.0e+00|vvi:100245269|K06611 stachyose synthetase [EC:2.4.1.67] | (RefSeq) stachyose synthase	Galactose metabolism (ko00052)	Raffinose synthase or seed imbibition protein Sip1	Stachyose synthase OS=Pisum sativum OX=3888 GN=STS1 PE=1 SV=1	Function unknown	hypothetical protein C3L33_07686, partial [Rhododendron williamsianum]		VaccDscaff31-processed-gene-80.1	Carbohydrate transport and metabolism	--	--	--	PI-PLC X domain-containing protein At5g67130 OS=Arabidopsis thaliana OX=3702 GN=At5g67130 PE=1 SV=1	Function unknown	PI-PLC X domain-containing protein At5g67130-like isoform X1 [Camellia sinensis]
VaccDscaff28-snap-gene-223.23	--	--	--	--	--	--	Monocarboxylate transporter 6 like [Actinidia chinensis var. chinensis]		VaccDscaff35-augustus-gene-273.51	--	K17279|2.1e-78|vvi:100255163|K17279 receptor expression-enhancing protein 5/6 | (RefSeq) HVA22-like protein a	--	TB2/DP1, HVA22 family	HVA22-like protein c OS=Arabidopsis thaliana OX=3702 GN=HVA22C PE=2 SV=1	Intracellular trafficking, secretion, and vesicular transport	hypothetical protein HYC85_015492 [Camellia sinensis]		VaccDscaff29-snap-gene-7.52	--	K22048|6.4e-178|jcu:110008602|K22048 mechanosensitive ion channel protein 4/5/6/7/8/9/10 | (RefSeq) mechanosensitive ion channel protein 10-like isoform X1	--	Mechanosensitive ion channel	Mechanosensitive ion channel protein 10 OS=Arabidopsis thaliana OX=3702 GN=MSL10 PE=1 SV=1	Cell wall/membrane/envelope biogenesis	hypothetical protein C3L33_03534, partial [Rhododendron williamsianum]
VaccDscaff20-augustus-gene-147.20	General function prediction only	K12116|0.0e+00|gmx:100301889|K12116 flavin-binding kelch repeat F-box protein 1 | (RefSeq) FKF1; circadian clock-associated FKF1	Circadian rhythm - plant (ko04712)	Galactose oxidase, central domain	Adagio protein 3 OS=Arabidopsis thaliana OX=3702 GN=ADO3 PE=1 SV=1	Signal transduction mechanisms	putative LOV domain-containing protein [Rhododendron tomentosum]		VaccDscaff8-processed-gene-41.25	--	K06636|1.6e-20|ppp:112291699|K06636 structural maintenance of chromosome 1 | (RefSeq) structural maintenance of chromosomes protein 2-2-like	--	Plant protein of unknown function (DUF641)	Protein GRAVITROPIC IN THE LIGHT 1 OS=Arabidopsis thaliana OX=3702 GN=GIL1 PE=1 SV=1	Function unknown	hypothetical protein C3L33_11741, partial [Rhododendron williamsianum]		VaccDscaff25-processed-gene-305.26	--	--	--	Extensin-like region	--	--	--
VaccDscaff35-augustus-gene-47.38	Cell wall/membrane/envelope biogenesis	K04371|9.3e-293|pop:7454239|K04371 mitogen-activated protein kinase 1/3 [EC:2.7.11.24] | (RefSeq) mitogen-activated protein kinase 15 isoform X1	--	Protein kinase domain	Mitogen-activated protein kinase 16 OS=Arabidopsis thaliana OX=3702 GN=MPK16 PE=2 SV=2	Signal transduction mechanisms	mitogen-activated protein kinase 15-like isoform X1 [Camellia sinensis]		VaccDscaff3-processed-gene-416.6	Lipid transport and metabolism	K21737|8.9e-222|jre:109021249|K21737 acyl-lipid Delta6-acetylenase / acyl-lipid (9-3)-desaturase [EC:1.14.19.38 1.14.19.47] | (RefSeq) acyl-lipid (9-3)-desaturase-like	--	Fatty acid desaturase	Acyl-lipid (9-3)-desaturase OS=Borago officinalis OX=13363 PE=1 SV=1	Lipid transport and metabolism	hypothetical protein C3L33_21775, partial [Rhododendron williamsianum]		VaccDscaff27-snap-gene-255.33	--	K09648|1.5e-20|pavi:110762209|K09648 mitochondrial inner membrane protease subunit 2 [EC:3.4.21.-] | (RefSeq) uncharacterized protein LOC110762209 isoform X1	Protein export (ko03060)	--	--	Function unknown	hypothetical protein C3L33_00686, partial [Rhododendron williamsianum]
VaccDscaff41-snap-gene-4.26	--	K15104|9.7e-139|psom:113289439|K15104 solute carrier family 25 (mitochondrial oxoglutarate transporter), member 11 | (RefSeq) mitochondrial uncoupling protein 5-like	--	Mitochondrial carrier protein	Mitochondrial uncoupling protein 5 OS=Arabidopsis thaliana OX=3702 GN=PUMP5 PE=2 SV=1	Energy production and conversion	hypothetical protein C3L33_10743, partial [Rhododendron williamsianum]		VaccDscaff35-augustus-gene-110.22	--	--	--	--	Protein E6 OS=Gossypium hirsutum OX=3635 GN=E6 PE=2 SV=1	--	hypothetical protein C3L33_15548, partial [Rhododendron williamsianum]		VaccDscaff17-snap-gene-166.24	--	--	--	--	Transcription factor bHLH149 OS=Arabidopsis thaliana OX=3702 GN=BHLH149 PE=1 SV=1	Transcription	hypothetical protein HYC85_017112 [Camellia sinensis]
VaccDscaff43-snap-gene-2.41	Secondary metabolites biosynthesis, transport and catabolism	K04125|2.0e-113|jre:108993679|K04125 gibberellin 2beta-dioxygenase [EC:1.14.11.13] | (RefSeq) gibberellin 2-beta-dioxygenase 2-like	Diterpenoid biosynthesis (ko00904)	2OG-Fe(II) oxygenase superfamily	Gibberellin 2-beta-dioxygenase 2 OS=Pisum sativum OX=3888 GN=GA2OX2 PE=2 SV=1	Secondary metabolites biosynthesis, transport and catabolism	hypothetical protein C3L33_03955, partial [Rhododendron williamsianum]		VaccDscaff46-processed-gene-142.0	Posttranslational modification, protein turnover, chaperones	K13993|1.5e-67|dzi:111301353|K13993 HSP20 family protein | (RefSeq) 17.3 kDa class I heat shock protein-like	Protein processing in endoplasmic reticulum (ko04141)	Hsp20/alpha crystallin family	18.5 kDa class I heat shock protein OS=Glycine max OX=3847 GN=HSP18.5-C PE=3 SV=1	Posttranslational modification, protein turnover, chaperones	--		VaccDscaff1-snap-gene-68.37	Amino acid transport and metabolism	K18787|7.8e-170|qsu:112037415|K18787 thermospermine synthase [EC:2.5.1.79] | (RefSeq) thermospermine synthase ACAULIS5-like	--	Spermine/spermidine synthase domain	Thermospermine synthase ACAULIS5 OS=Arabidopsis thaliana OX=3702 GN=ACL5 PE=1 SV=1	Amino acid transport and metabolism	hypothetical protein F0562_000317 [Nyssa sinensis]
VaccDscaff29-augustus-gene-7.44	Secondary metabolites biosynthesis, transport and catabolism;; Defense mechanisms	K00487|5.1e-274|gab:108486152|K00487 trans-cinnamate 4-monooxygenase [EC:1.14.14.91] | (RefSeq) trans-cinnamate 4-monooxygenase	Ubiquinone and other terpenoid-quinone biosynthesis (ko00130);; Phenylpropanoid biosynthesis (ko00940);; Flavonoid biosynthesis (ko00941);; Stilbenoid, diarylheptanoid and gingerol biosynthesis (ko00945)	Cytochrome P450	Trans-cinnamate 4-monooxygenase OS=Catharanthus roseus OX=4058 GN=CYP73A4 PE=2 SV=1	Secondary metabolites biosynthesis, transport and catabolism	cinnamate 4-hydroxylase [Vaccinium corymbosum]		VaccDscaff20-processed-gene-334.3	--	--	--	Associated with HOX	Homeobox protein BEL1 homolog OS=Arabidopsis thaliana OX=3702 GN=BEL1 PE=1 SV=2	Transcription	hypothetical protein C3L33_16065, partial [Rhododendron williamsianum]		VaccDscaff30-augustus-gene-327.29	--	--	--	Helix-loop-helix DNA-binding domain	Transcription factor BHLH062 OS=Oryza sativa subsp. japonica OX=39947 GN=BHLH062 PE=1 SV=1	Transcription	transcription factor BHLH011, partial [Vaccinium corymbosum]
VaccDscaff23-augustus-gene-5.20	Signal transduction mechanisms	K13412|1.0e-259|nau:109231977|K13412 calcium-dependent protein kinase [EC:2.7.11.1] | (RefSeq) calcium-dependent protein kinase 18-like	Plant-pathogen interaction (ko04626)	Protein kinase domain	Calcium-dependent protein kinase 28 OS=Arabidopsis thaliana OX=3702 GN=CPK28 PE=1 SV=1	Signal transduction mechanisms	Calcium-dependent protein kinase [Actinidia chinensis var. chinensis]		VaccDscaff3-augustus-gene-34.34	--	K00430|4.1e-136|oeu:111394706|K00430 peroxidase [EC:1.11.1.7] | (RefSeq) peroxidase N1-like	Phenylpropanoid biosynthesis (ko00940)	Peroxidase	Peroxidase N1 OS=Nicotiana tabacum OX=4097 GN=poxN1 PE=1 SV=1	Secondary metabolites biosynthesis, transport and catabolism	hypothetical protein C3L33_07921, partial [Rhododendron williamsianum]		VaccDscaff8-augustus-gene-35.43	--	--	--	--	--	Function unknown	hypothetical protein C3L33_11699, partial [Rhododendron williamsianum]
VaccDscaff32-snap-gene-36.48	Coenzyme transport and metabolism	--	--	Methyltransferase domain	--	Function unknown	hypothetical protein C3L33_19330, partial [Rhododendron williamsianum]		VaccDscaff36-augustus-gene-115.21	Lipid transport and metabolism	K05929|9.0e-252|hbr:110637755|K05929 phosphoethanolamine N-methyltransferase [EC:2.1.1.103] | (RefSeq) phosphomethylethanolamine N-methyltransferase	Glycerophospholipid metabolism (ko00564)	Methyltransferase domain	Phosphomethylethanolamine N-methyltransferase OS=Arabidopsis thaliana OX=3702 GN=NMT2 PE=1 SV=2	Lipid transport and metabolism	Phosphomethylethanolamine N-methyltransferase [Actinidia chinensis var. chinensis]		VaccDscaff16-augustus-gene-353.31	--	K09377|2.2e-108|vvi:100253922|K09377 cysteine and glycine-rich protein | (RefSeq) LIM domain-containing protein WLIM1	--	LIM domain	LIM domain-containing protein WLIM1 OS=Arabidopsis thaliana OX=3702 GN=WLIM1 PE=1 SV=1	Function unknown	PREDICTED: LIM domain-containing protein WLIM1 [Vitis vinifera]
VaccDscaff48-augustus-gene-43.49	Carbohydrate transport and metabolism	K13080|2.0e-117|vvi:100244875|K13080 flavanone 7-O-glucoside 2''-O-beta-L-rhamnosyltransferase [EC:2.4.1.236] | (RefSeq) flavanone 7-O-glucoside 2''-O-beta-L-rhamnosyltransferase	Flavonoid biosynthesis (ko00941);; Flavone and flavonol biosynthesis (ko00944)	UDP-glucoronosyl and UDP-glucosyl transferase	UDP-glucosyltransferase 29 OS=Panax ginseng OX=4054 GN=UGT29 PE=1 SV=1	--	Beta-D-glucosyl crocetin beta-1,6-glucosyltransferase [Actinidia chinensis var. chinensis]		VaccDscaff41-augustus-gene-197.21	--	K11593|0.0e+00|qsu:111991924|K11593 eukaryotic translation initiation factor 2C | (RefSeq) protein argonaute 4-like	--	Piwi domain	Protein argonaute 4 OS=Arabidopsis thaliana OX=3702 GN=AGO4 PE=1 SV=2	Translation, ribosomal structure and biogenesis	Protein argonaute like [Actinidia chinensis var. chinensis]		VaccDscaff23-augustus-gene-100.23	Signal transduction mechanisms	K00521|2.6e-292|han:110937641|K00521 ferric-chelate reductase [EC:1.16.1.7] | (RefSeq) ferric reduction oxidase 2-like	--	Ferric reductase NAD binding domain	Ferric reduction oxidase 2 OS=Arabidopsis thaliana OX=3702 GN=FRO2 PE=1 SV=2	Intracellular trafficking, secretion, and vesicular transport	Ferric reduction oxidase [Actinidia chinensis var. chinensis]
VaccDscaff3-processed-gene-113.10	--	K09287|2.4e-129|jcu:105641983|K09287 RAV-like factor | (RefSeq) AP2/ERF and B3 domain-containing transcription factor RAV1	--	B3 DNA binding domain	AP2/ERF and B3 domain-containing transcription repressor RAV2 OS=Arabidopsis thaliana OX=3702 GN=RAV2 PE=1 SV=1	Transcription	hypothetical protein C3L33_13727, partial [Rhododendron williamsianum]		VaccDscaff21-snap-gene-9.26	Energy production and conversion	K00279|2.4e-196|nta:107793379|K00279 cytokinin dehydrogenase [EC:1.5.99.12] | (RefSeq) cytokinin dehydrogenase 3-like	Zeatin biosynthesis (ko00908)	Cytokinin dehydrogenase 1, FAD and cytokinin binding	Cytokinin dehydrogenase 3 OS=Arabidopsis thaliana OX=3702 GN=CKX3 PE=1 SV=1	Energy production and conversion	Cytokinin dehydrogenase [Actinidia chinensis var. chinensis]		VaccDscaff15-snap-gene-231.24	--	--	--	TLC domain	--	Intracellular trafficking, secretion, and vesicular transport	TLC domain-containing protein 4-B-like [Juglans regia]
VaccDscaff13-augustus-gene-283.24	Lipid transport and metabolism	K13396|4.7e-85|psom:113295244|K13396 (S)-tetrahydroprotoberberine N-methyltransferase [EC:2.1.1.122] | (RefSeq) (S)-tetrahydroprotoberberine N-methyltransferase	Isoquinoline alkaloid biosynthesis (ko00950)	Mycolic acid cyclopropane synthetase	(S)-coclaurine N-methyltransferase OS=Thalictrum flavum subsp. glaucum OX=150095 PE=1 SV=1	Cell wall/membrane/envelope biogenesis	(S)-coclaurine N-methyltransferase [Actinidia chinensis var. chinensis]		VaccDscaff21-snap-gene-227.11	Signal transduction mechanisms	K00924|9.2e-101|ini:109185417|K00924 kinase [EC:2.7.1.-] | (RefSeq) probable receptor-like protein kinase At5g47070	--	Protein kinase domain	Serine/threonine-protein kinase PCRK1 OS=Arabidopsis thaliana OX=3702 GN=PCRK1 PE=1 SV=1	Signal transduction mechanisms	hypothetical protein C3L33_02640, partial [Rhododendron williamsianum]		VaccDscaff26-snap-gene-290.29	--	--	--	--	--	--	dehydrin 1 [Vaccinium corymbosum]
VaccDscaff24-augustus-gene-114.29	Signal transduction mechanisms	K08712|1.0e-133|gsl:Gasu_29800|K08712 ATP-binding cassette, subfamily G (WHITE), member 2, SNQ2 | (RefSeq) ABC transporter, ATP-binding protein	ABC transporters (ko02010)	ABC-2 type transporter	Pleiotropic drug resistance protein 2 OS=Nicotiana plumbaginifolia OX=4092 GN=PDR2 PE=2 SV=1	Secondary metabolites biosynthesis, transport and catabolism	hypothetical protein C3L33_06760, partial [Rhododendron williamsianum]		VaccDscaff7-processed-gene-56.1	--	--	--	--	--	--	hypothetical protein C3L33_09607, partial [Rhododendron williamsianum]		VaccDscaff36-augustus-gene-86.32	Signal transduction mechanisms	K12127|9.1e-195|vvi:100258790|K12127 pseudo-response regulator 1 | (RefSeq) two-component response regulator-like APRR1	Circadian rhythm - plant (ko04712)	Response regulator receiver domain	Two-component response regulator-like APRR1 OS=Arabidopsis thaliana OX=3702 GN=APRR1 PE=1 SV=1	Transcription	Two-component response regulator-like [Actinidia chinensis var. chinensis]
VaccDscaff9-processed-gene-285.6	Cell wall/membrane/envelope biogenesis	K20893|1.3e-115|gmx:100818099|K20893 probable galacturonosyltransferase-like 1 [EC:2.4.1.-] | (RefSeq) probable galacturonosyltransferase-like 1	--	Glycosyl transferase family 8	Probable galacturonosyltransferase-like 9 OS=Arabidopsis thaliana OX=3702 GN=GATL9 PE=2 SV=1	Carbohydrate transport and metabolism	hypothetical protein C3L33_14053, partial [Rhododendron williamsianum]		VaccDscaff6-snap-gene-73.39	--	--	--	--	Metallothionein-like protein type 3 OS=Carica papaya OX=3649 PE=3 SV=1	Function unknown	type 3 metallothionein-like protein [Cyamopsis tetragonoloba]		VaccDscaff828-processed-gene-0.6	--	--	--	--	Protein LNK2 OS=Arabidopsis thaliana OX=3702 GN=LNK2 PE=1 SV=1	Function unknown	hypothetical protein C3L33_08374, partial [Rhododendron williamsianum]
VaccDscaff22-processed-gene-119.5	--	K14500|1.3e-152|oeu:111375126|K14500 BR-signaling kinase [EC:2.7.11.1] | (RefSeq) probable serine/threonine-protein kinase At5g41260	Plant hormone signal transduction (ko04075)	--	Serine/threonine-protein kinase BSK7 OS=Arabidopsis thaliana OX=3702 GN=BSK7 PE=3 SV=1	Signal transduction mechanisms	hypothetical protein TEA_022143 [Camellia sinensis var. sinensis]		VaccDscaff2-processed-gene-268.2	--	--	--	Glycosyltransferase family 92	Glycosyltransferase family 92 protein RCOM_0530710 OS=Ricinus communis OX=3988 GN=RCOM_0699480 PE=3 SV=1	Function unknown	hypothetical protein C3L33_13538, partial [Rhododendron williamsianum]		VaccDscaff41-augustus-gene-105.40	--	--	--	RNA-binding protein Tab2/Atab2	Protein TAB2 homolog, chloroplastic OS=Arabidopsis thaliana OX=3702 GN=ATAB2 PE=2 SV=1	Function unknown	hypothetical protein C3L33_05103, partial [Rhododendron williamsianum]
VaccDscaff15-processed-gene-262.8	Secondary metabolites biosynthesis, transport and catabolism	K09840|3.6e-263|sind:105175729|K09840 9-cis-epoxycarotenoid dioxygenase [EC:1.13.11.51] | (RefSeq) probable 9-cis-epoxycarotenoid dioxygenase NCED5, chloroplastic	Carotenoid biosynthesis (ko00906)	Retinal pigment epithelial membrane protein	9-cis-epoxycarotenoid dioxygenase NCED2, chloroplastic OS=Solanum lycopersicum OX=4081 GN=NCED2 PE=2 SV=1	Secondary metabolites biosynthesis, transport and catabolism	hypothetical protein C3L33_06707, partial [Rhododendron williamsianum]		VaccDscaff42-augustus-gene-181.27	Carbohydrate transport and metabolism	K08150|1.0e-67|vvi:100268023|K08150 MFS transporter, SP family, solute carrier family 2 (myo-inositol transporter), member 13 | (RefSeq) INT1; inositol transporter 1	--	Sugar (and other) transporter	Polyol transporter 5 OS=Arabidopsis thaliana OX=3702 GN=PLT5 PE=1 SV=2	Intracellular trafficking, secretion, and vesicular transport	polyol transporter 5-like [Camellia sinensis]		VaccDscaff13-augustus-gene-12.21	Carbohydrate transport and metabolism	K01087|2.8e-155|dcr:108215772|K01087 trehalose 6-phosphate phosphatase [EC:3.1.3.12] | (RefSeq) probable trehalose-phosphate phosphatase J	Starch and sucrose metabolism (ko00500)	Trehalose-phosphatase	Probable trehalose-phosphate phosphatase J OS=Arabidopsis thaliana OX=3702 GN=TPPJ PE=1 SV=1	Carbohydrate transport and metabolism	Trehalose-phosphate phosphatase [Actinidia chinensis var. chinensis]
VaccDscaff31-snap-gene-275.28	Amino acid transport and metabolism	K01626|6.9e-258|mesc:110609708|K01626 3-deoxy-7-phosphoheptulonate synthase [EC:2.5.1.54] | (RefSeq) phospho-2-dehydro-3-deoxyheptonate aldolase 1, chloroplastic-like	Phenylalanine, tyrosine and tryptophan biosynthesis (ko00400);; Biosynthesis of amino acids (ko01230)	Class-II DAHP synthetase family	Phospho-2-dehydro-3-deoxyheptonate aldolase 1, chloroplastic OS=Solanum tuberosum OX=4113 GN=SHKA PE=1 SV=2	Amino acid transport and metabolism	phospho-2-dehydro-3-deoxyheptonate aldolase 1, chloroplastic-like [Camellia sinensis]		VaccDscaff21-augustus-gene-85.23	--	--	--	--	BAG family molecular chaperone regulator 7 OS=Arabidopsis thaliana OX=3702 GN=BAG7 PE=1 SV=1	Function unknown	BAG family molecular chaperone regulator like [Actinidia chinensis var. chinensis]		VaccDscaff66-snap-gene-8.50	--	K12133|1.2e-240|vvi:100250535|K12133 MYB-related transcription factor LHY | (RefSeq) protein LHY	Circadian rhythm - plant (ko04712)	Myb-like DNA-binding domain	Protein LHY OS=Arabidopsis thaliana OX=3702 GN=LHY PE=1 SV=2	Transcription	hypothetical protein C3L33_04920, partial [Rhododendron williamsianum]
VaccDscaff37-snap-gene-235.41	Inorganic ion transport and metabolism	K01535|0.0e+00|cit:102616096|K01535 H+-transporting ATPase [EC:7.1.2.1] | (RefSeq) plasma membrane ATPase 4	Oxidative phosphorylation (ko00190)	haloacid dehalogenase-like hydrolase	Plasma membrane ATPase 4 OS=Nicotiana plumbaginifolia OX=4092 GN=PMA4 PE=2 SV=1	Inorganic ion transport and metabolism	Plasma membrane ATPase 4 [Gossypium arboreum]		VaccDscaff18-snap-gene-49.36	Cell wall/membrane/envelope biogenesis	K13415|9.7e-100|ini:109185793|K13415 protein brassinosteroid insensitive 1 [EC:2.7.10.1 2.7.11.1] | (RefSeq) systemin receptor SR160-like	Plant hormone signal transduction (ko04075)	Protein kinase domain	Receptor protein-tyrosine kinase CEPR1 OS=Arabidopsis thaliana OX=3702 GN=CEPR1 PE=1 SV=1	Signal transduction mechanisms	hypothetical protein C3L33_09277, partial [Rhododendron williamsianum]		VaccDscaff3-augustus-gene-324.28	Lipid transport and metabolism;; General function prediction only	K00108|2.2e-249|pvu:PHAVU_003G213000g|K00108 choline dehydrogenase [EC:1.1.99.1] | (RefSeq) hypothetical protein	Glycine, serine and threonine metabolism (ko00260)	GMC oxidoreductase	Protein HOTHEAD OS=Arabidopsis thaliana OX=3702 GN=HTH PE=1 SV=1	Amino acid transport and metabolism	hypothetical protein HYC85_026614 [Camellia sinensis]
VaccDscaff16-snap-gene-91.37	General function prediction only	--	--	NAD(P)H-binding	Uncharacterized protein At1g32220, chloroplastic OS=Arabidopsis thaliana OX=3702 GN=At1g32220 PE=1 SV=1	--	hypothetical protein C3L33_18687, partial [Rhododendron williamsianum]		VaccDscaff39-augustus-gene-21.30	Cell wall/membrane/envelope biogenesis	K03098|4.5e-95|qsu:112019869|K03098 apolipoprotein D and lipocalin family protein | (RefSeq) temperature-induced lipocalin-1	--	Lipocalin-like domain	Temperature-induced lipocalin-1 OS=Arabidopsis thaliana OX=3702 GN=TIL PE=1 SV=1	Cell wall/membrane/envelope biogenesis	temperature-induced lipocalin-1-like [Camellia sinensis]		VaccDscaff46-snap-gene-131.56	--	K20628|6.0e-106|sind:105166984|K20628 expansin | (RefSeq) expansin-A2	--	Expansin C-terminal domain	Expansin-A4 OS=Arabidopsis thaliana OX=3702 GN=EXPA4 PE=1 SV=1	Carbohydrate transport and metabolism	Expansin-A4 like [Actinidia chinensis var. chinensis]
Vaccinium_corymbosum_newGene_5490	--	K22422|5.7e-11|smo:SELMODRAFT_439222|K22422 protein downstream neighbor of Son | (RefSeq) hypothetical protein	--	SOUL heme-binding protein	--	Function unknown	heme-binding protein 2 [Camellia sinensis]		VaccDscaff2-processed-gene-325.10	--	--	--	--	--	Function unknown	Disease resistance RPP13-like protein [Actinidia chinensis var. chinensis]		VaccDscaff6-augustus-gene-82.26	--	--	--	--	--	--	hypothetical protein C3L33_10144, partial [Rhododendron williamsianum]
VaccDscaff17-augustus-gene-256.19	Energy production and conversion;; Posttranslational modification, protein turnover, chaperones	K02258|1.3e-61|jre:109010650|K02258 cytochrome c oxidase assembly protein subunit 11 | (RefSeq) cytochrome c oxidase assembly protein COX11, mitochondrial-like	Oxidative phosphorylation (ko00190)	Cytochrome c oxidase assembly protein CtaG/Cox11	Cytochrome c oxidase assembly protein COX11, mitochondrial OS=Arabidopsis thaliana OX=3702 GN=COX11 PE=2 SV=1	Posttranslational modification, protein turnover, chaperones	Cytochrome c oxidase assembly protein [Actinidia chinensis var. chinensis]		VaccDscaff42-snap-gene-48.43	--	--	--	Trypsin and protease inhibitor	Miraculin OS=Synsepalum dulcificum OX=3743 PE=1 SV=3	Function unknown	hypothetical protein F0562_009106 [Nyssa sinensis]		VaccDscaff19-snap-gene-240.23	Inorganic ion transport and metabolism	K01082|2.6e-137|vvi:100250311|K01082 3'(2'), 5'-bisphosphate nucleotidase [EC:3.1.3.7] | (RefSeq) PAP-specific phosphatase HAL2-like	Sulfur metabolism (ko00920)	Inositol monophosphatase family	PAP-specific phosphatase HAL2-like OS=Arabidopsis thaliana OX=3702 GN=AHL PE=2 SV=1	Inorganic ion transport and metabolism	PAP-specific phosphatase HAL2-like [Camellia sinensis]
VaccDscaff33-augustus-gene-77.27	Signal transduction mechanisms	K13412|6.7e-233|dcr:108218889|K13412 calcium-dependent protein kinase [EC:2.7.11.1] | (RefSeq) calcium-dependent protein kinase 1-like	Plant-pathogen interaction (ko04626)	Protein kinase domain	Calcium-dependent protein kinase 11 OS=Oryza sativa subsp. japonica OX=39947 GN=CPK11 PE=3 SV=1	Signal transduction mechanisms	calcium-dependent protein kinase 1-like [Camellia sinensis]		VaccDscaff3-processed-gene-180.0	General function prediction only	K13457|4.8e-102|nnu:104607772|K13457 disease resistance protein RPM1 | (RefSeq) disease resistance protein RPM1-like	Plant-pathogen interaction (ko04626)	NB-ARC domain	Disease resistance protein RPP13 OS=Arabidopsis thaliana OX=3702 GN=RPP13 PE=2 SV=2	Signal transduction mechanisms	hypothetical protein C3L33_17543, partial [Rhododendron williamsianum]		VaccDscaff25-augustus-gene-271.22	--	--	--	Protein of unknown function (DUF1645)	--	Function unknown	hypothetical protein C3L33_13485, partial [Rhododendron williamsianum]
VaccDscaff15-augustus-gene-317.31	--	--	--	Domain of unknown function (DUF966)	Protein UPSTREAM OF FLC OS=Arabidopsis thaliana OX=3702 GN=UFC PE=2 SV=1	Function unknown	hypothetical protein C3L33_06952, partial [Rhododendron williamsianum]		VaccDscaff2-augustus-gene-245.33	--	K02537|1.8e-60|lang:109327407|K02537 mitotic spindle assembly checkpoint protein MAD2 | (RefSeq) mitotic spindle checkpoint protein MAD2	--	HORMA domain	Mitotic spindle checkpoint protein MAD2 OS=Arabidopsis thaliana OX=3702 GN=MAD2 PE=1 SV=1	--	putative mitotic spindle checkpoint protein Mad2 [Lupinus albus]		VaccDscaff35-snap-gene-236.32	--	K05929|3.7e-62|nnu:104601850|K05929 phosphoethanolamine N-methyltransferase [EC:2.1.1.103] | (RefSeq) phosphoethanolamine N-methyltransferase-like	Glycerophospholipid metabolism (ko00564)	Methyltransferase domain	Phosphoethanolamine N-methyltransferase 1 OS=Arabidopsis thaliana OX=3702 GN=NMT1 PE=1 SV=1	Function unknown	phosphomethylethanolamine N-methyltransferase-like isoform X2 [Camellia sinensis]
VaccDscaff26-processed-gene-109.8	--	--	--	--	--	--	hypothetical protein HYC85_013720 [Camellia sinensis]		VaccDscaff16-augustus-gene-58.34	--	K07374|1.1e-259|cit:102609137|K07374 tubulin alpha | (RefSeq) tubulin alpha chain	Phagosome (ko04145)	Tubulin/FtsZ family, GTPase domain	Tubulin alpha-3 chain OS=Hordeum vulgare OX=4513 GN=TUBA3 PE=2 SV=1	Cytoskeleton	tubulin alpha chain [Camellia sinensis]		VaccDscaff49-snap-gene-37.45	Defense mechanisms	K05666|0.0e+00|qsu:112033918|K05666 ATP-binding cassette, subfamily C (CFTR/MRP), member 2 | (RefSeq) ABC transporter C family member 10-like	ABC transporters (ko02010)	ABC transporter	ABC transporter C family member 10 OS=Arabidopsis thaliana OX=3702 GN=ABCC10 PE=2 SV=2	Defense mechanisms	hypothetical protein C3L33_16102, partial [Rhododendron williamsianum]
VaccDscaff60-processed-gene-9.15	--	--	--	--	--	--	hypothetical protein C3L33_03746, partial [Rhododendron williamsianum]		VaccDscaff36-augustus-gene-34.28	--	--	--	Plastocyanin-like domain	Blue copper protein 1a OS=Medicago truncatula OX=3880 GN=MTR_7g086140 PE=2 SV=1	Function unknown	Lamin-like protein [Actinidia chinensis var. chinensis]		VaccDscaff23-augustus-gene-349.16	--	K14486|0.0e+00|vvi:100254074|K14486 auxin response factor | (RefSeq) auxin response factor 5	Plant hormone signal transduction (ko04075)	Auxin response factor	Auxin response factor 5 OS=Arabidopsis thaliana OX=3702 GN=ARF5 PE=1 SV=3	Transcription	hypothetical protein C3L33_11127, partial [Rhododendron williamsianum]
VaccDscaff3-processed-gene-428.8	Lipid transport and metabolism	K16818|5.0e-94|mesc:110616212|K16818 phospholipase A1 [EC:3.1.1.32] | (RefSeq) phospholipase A(1) DAD1, chloroplastic-like	Glycerophospholipid metabolism (ko00564);; alpha-Linolenic acid metabolism (ko00592)	Lipase (class 3)	Phospholipase A1-Ibeta2, chloroplastic OS=Arabidopsis thaliana OX=3702 GN=At4g16820 PE=1 SV=2	Lipid transport and metabolism	phospholipase A1-Ibeta2, chloroplastic-like [Camellia sinensis]		VaccDscaff27-processed-gene-141.11	--	--	--	--	E3 ubiquitin-protein ligase RFI2 OS=Arabidopsis thaliana OX=3702 GN=RFI2 PE=1 SV=2	Posttranslational modification, protein turnover, chaperones	hypothetical protein C3L33_19900, partial [Rhododendron williamsianum]		VaccDscaff17-snap-gene-45.38	--	K17500|5.2e-30|nto:104085001|K17500 integrin-linked kinase-associated serine/threonine phosphatase 2C [EC:3.1.3.16] | (RefSeq) WAT1-related protein At3g18200 isoform X1	--	EamA-like transporter family	WAT1-related protein At2g37460 OS=Arabidopsis thaliana OX=3702 GN=At2g37460 PE=2 SV=1	Function unknown	WAT1-related protein [Actinidia chinensis var. chinensis]
VaccDscaff40-snap-gene-77.34	--	K00020|6.7e-21|mtr:MTR_8g088900|K00020 3-hydroxyisobutyrate dehydrogenase [EC:1.1.1.31] | (RefSeq) 6-phosphogluconate dehydrogenase-like protein	Valine, leucine and isoleucine degradation (ko00280)	Phosphate-induced protein 1 conserved region	Protein PHOSPHATE-INDUCED 1 OS=Nicotiana tabacum OX=4097 GN=PHI-1 PE=2 SV=1	Replication, recombination and repair	Protein EXORDIUM [Gossypium australe]		VaccDscaff19-augustus-gene-73.30	--	K10752|2.6e-06|zju:107427343|K10752 histone-binding protein RBBP4 | (RefSeq) LOW QUALITY PROTEIN: WD-40 repeat-containing protein MSI3	--	Heavy-metal-associated domain	Copper transport protein ATX1 OS=Arabidopsis thaliana OX=3702 GN=ATX1 PE=1 SV=2	Inorganic ion transport and metabolism	Copper transport protein like [Actinidia chinensis var. chinensis]		VaccDscaff17-augustus-gene-26.12	Lipid transport and metabolism	K21483|6.1e-144|zju:107424658|K21483 salicylate 1-O-methyltransferase [EC:2.1.1.274] | (RefSeq) salicylate carboxymethyltransferase	--	SAM dependent carboxyl methyltransferase	Salicylate carboxymethyltransferase OS=Clarkia breweri OX=36903 GN=SAMT PE=1 SV=1	Function unknown	hypothetical protein C3L33_01088, partial [Rhododendron williamsianum]
VaccDscaff2-snap-gene-441.38	Carbohydrate transport and metabolism	--	--	Major Facilitator Superfamily	--	Function unknown	Hippocampus abundant transcript-like protein [Actinidia chinensis var. chinensis]		VaccDscaff26-snap-gene-44.75	Transcription	K03093|8.5e-184|vvi:100250120|K03093 RNA polymerase sigma factor | (RefSeq) RNA polymerase sigma factor sigE, chloroplastic/mitochondrial	--	Sigma-70 region 3	RNA polymerase sigma factor sigE, chloroplastic/mitochondrial OS=Arabidopsis thaliana OX=3702 GN=SIGE PE=1 SV=1	Transcription	hypothetical protein C3L33_03317, partial [Rhododendron williamsianum]		VaccDscaff27-snap-gene-82.33	--	--	--	--	Protein LNK1 OS=Arabidopsis thaliana OX=3702 GN=LNK1 PE=1 SV=1	Function unknown	hypothetical protein C3L33_19771, partial [Rhododendron williamsianum]
VaccDscaff43-snap-gene-237.36	--	K22013|4.2e-68|vvi:100265112|K22013 magnesium dechelatase [EC:4.99.1.10] | (RefSeq) protein STAY-GREEN 1, chloroplastic	Porphyrin and chlorophyll metabolism (ko00860)	Staygreen protein	Protein STAY-GREEN homolog, chloroplastic OS=Capsicum annuum OX=4072 GN=SGR PE=1 SV=2	Function unknown	hypothetical protein C3L33_08598, partial [Rhododendron williamsianum]		VaccDscaff46-augustus-gene-158.28	--	--	--	Protein of unknown function (DUF568)	Cytochrome b561 and DOMON domain-containing protein At3g25290 OS=Arabidopsis thaliana OX=3702 GN=At3g25290 PE=2 SV=1	Signal transduction mechanisms	hypothetical protein C3L33_04391, partial [Rhododendron williamsianum]		VaccDscaff43-processed-gene-102.10	--	K14491|2.6e-21|thj:104803637|K14491 two-component response regulator ARR-B family | (RefSeq) two-component response regulator ARR12 isoform X2	Plant hormone signal transduction (ko04075)	Myb-like DNA-binding domain	Transcription factor LUX OS=Arabidopsis thaliana OX=3702 GN=LUX PE=1 SV=1	Transcription	hypothetical protein C3L33_04536, partial [Rhododendron williamsianum]
VaccDscaff23-processed-gene-274.4	--	K15104|3.4e-138|psom:113289439|K15104 solute carrier family 25 (mitochondrial oxoglutarate transporter), member 11 | (RefSeq) mitochondrial uncoupling protein 5-like	--	Mitochondrial carrier protein	Mitochondrial uncoupling protein 5 OS=Arabidopsis thaliana OX=3702 GN=PUMP5 PE=2 SV=1	Energy production and conversion	hypothetical protein C3L33_10743, partial [Rhododendron williamsianum]		VaccDscaff7-augustus-gene-409.19	--	--	--	Plant specific mitochondrial import receptor subunit TOM20	Mitochondrial import receptor subunit TOM20 OS=Solanum tuberosum OX=4113 GN=TOM20 PE=1 SV=1	Intracellular trafficking, secretion, and vesicular transport	hypothetical protein C3L33_19123, partial [Rhododendron williamsianum]		VaccDscaff43-augustus-gene-5.31	Signal transduction mechanisms	--	--	Universal stress protein family	--	Signal transduction mechanisms	hypothetical protein C3L33_03978, partial [Rhododendron williamsianum]
VaccDscaff7-augustus-gene-290.39	Signal transduction mechanisms	K08712|2.0e-140|gsl:Gasu_29800|K08712 ATP-binding cassette, subfamily G (WHITE), member 2, SNQ2 | (RefSeq) ABC transporter, ATP-binding protein	ABC transporters (ko02010)	ABC-2 type transporter	Pleiotropic drug resistance protein 1 OS=Petunia axillaris OX=33119 GN=PDR1 PE=2 SV=1	Secondary metabolites biosynthesis, transport and catabolism	pleiotropic drug resistance protein 1-like isoform X1 [Camellia sinensis]		VaccDscaff38-snap-gene-93.25		K13418|3.0e-279|pxb:103931945|K13418 somatic embryogenesis receptor kinase 1 [EC:2.7.10.1 2.7.11.1] | (RefSeq) somatic embryogenesis receptor kinase 2	--	Protein kinase domain	LRR receptor kinase BAK1 OS=Oryza sativa subsp. indica OX=39946 GN=BAK1 PE=2 SV=1	Signal transduction mechanisms	LRR receptor kinase BAK1 [Camellia sinensis]		VaccDscaff30-processed-gene-305.28	--	--	--	CCT motif	Zinc finger protein CONSTANS-LIKE 15 OS=Arabidopsis thaliana OX=3702 GN=COL15 PE=1 SV=1	Function unknown	hypothetical protein C3L33_22008, partial [Rhododendron williamsianum]
VaccDscaff8-processed-gene-300.2	Carbohydrate transport and metabolism;; Amino acid transport and metabolism;; Inorganic ion transport and metabolism;; General function prediction only	K08176|5.9e-265|sind:105158458|K08176 MFS transporter, PHS family, inorganic phosphate transporter | (RefSeq) inorganic phosphate transporter 1-4-like	--	Sugar (and other) transporter	Probable inorganic phosphate transporter 1-7 OS=Arabidopsis thaliana OX=3702 GN=PHT1-7 PE=2 SV=2	Inorganic ion transport and metabolism	hypothetical protein C3L33_12638, partial [Rhododendron williamsianum]		VaccDscaff4-augustus-gene-60.41	--	K08486|8.6e-131|nta:107800892|K08486 syntaxin 1B/2/3 | (RefSeq) syntaxin-related protein KNOLLE-like	SNARE interactions in vesicular transport (ko04130)	Syntaxin	Syntaxin-related protein KNOLLE OS=Arabidopsis thaliana OX=3702 GN=KN PE=1 SV=1	Intracellular trafficking, secretion, and vesicular transport	hypothetical protein C3L33_15037, partial [Rhododendron williamsianum]		VaccDscaff35-augustus-gene-108.18	--	--	--	Dormancy/auxin associated protein	Auxin-repressed 12.5 kDa protein OS=Fragaria ananassa OX=3747 PE=2 SV=1	Function unknown	hypothetical protein C3L33_15537, partial [Rhododendron williamsianum]
VaccDscaff8-augustus-gene-393.25	--	K18643|1.5e-19|gra:105795008|K18643 katanin p80 WD40 repeat-containing subunit B1 | (RefSeq) uncharacterized LOC105795008	--	Protein of unknown function (DUF789)	--	Function unknown	core protein [Actinidia chinensis var. chinensis]		VaccDscaff17-augustus-gene-294.21	Carbohydrate transport and metabolism	K01728|1.9e-207|tcc:18605010|K01728 pectate lyase [EC:4.2.2.2] | (RefSeq) probable pectate lyase 18	Pentose and glucuronate interconversions (ko00040)	Pectate lyase	Probable pectate lyase 18 OS=Arabidopsis thaliana OX=3702 GN=At4g24780 PE=2 SV=2	Carbohydrate transport and metabolism	hypothetical protein C3L33_00593, partial [Rhododendron williamsianum]		VaccDscaff26-augustus-gene-61.51	Lipid transport and metabolism;; Secondary metabolites biosynthesis, transport and catabolism	K22133|4.3e-252|sind:105160473|K22133 oxalate---CoA ligase [EC:6.2.1.8] | (RefSeq) oxalate--CoA ligase	Glyoxylate and dicarboxylate metabolism (ko00630)	AMP-binding enzyme	Oxalate--CoA ligase OS=Arabidopsis thaliana OX=3702 GN=AAE3 PE=1 SV=1	Lipid transport and metabolism;; Secondary metabolites biosynthesis, transport and catabolism	hypothetical protein C3L33_03220, partial [Rhododendron williamsianum]
VaccDscaff28-processed-gene-315.9	Signal transduction mechanisms	K13430|2.2e-53|csat:104783579|K13430 serine/threonine-protein kinase PBS1 [EC:2.7.11.1] | (RefSeq) serine/threonine-protein kinase CDG1	Plant-pathogen interaction (ko04626)	Protein kinase domain	Putative serine/threonine-protein kinase-like protein CCR3 OS=Arabidopsis thaliana OX=3702 GN=CCR3 PE=2 SV=1	Signal transduction mechanisms	hypothetical protein C3L33_16605, partial [Rhododendron williamsianum]		VaccDscaff46-augustus-gene-204.29	Signal transduction mechanisms	--	--	Universal stress protein family	--	Signal transduction mechanisms	hypothetical protein C3L33_03978, partial [Rhododendron williamsianum]		VaccDscaff149-augustus-gene-1.17	Lipid transport and metabolism	K14209|2.1e-70|ats:109773794|K14209 solute carrier family 36 (proton-coupled amino acid transporter) | (RefSeq) uncharacterized protein LOC109773794	--	GDSL-like Lipase/Acylhydrolase	GDSL esterase/lipase EXL3 OS=Arabidopsis thaliana OX=3702 GN=EXL3 PE=2 SV=1	Function unknown	hypothetical protein C3L33_11174, partial [Rhododendron williamsianum]
VaccDscaff21-augustus-gene-55.43	--	K11420|5.5e-08|lsv:111908241|K11420 [histone H3]-lysine9 N-trimethyltransferase EHMT [EC:2.1.1.355] | (RefSeq) histone-lysine N-methyltransferase family member SUVH9-like	Lysine degradation (ko00310)	--	--	--	histone-lysine N-methyltransferase family member SUVH9-like [Camellia sinensis]		VaccDscaff32-processed-gene-55.7	--	--	--	--	--	--	hypothetical protein C3L33_19269, partial [Rhododendron williamsianum]		VaccDscaff9-snap-gene-228.27	--	K17616|5.9e-55|oeu:111404463|K17616 CTD small phosphatase-like protein 2 [EC:3.1.3.-] | (RefSeq) uncharacterized protein LOC111404463	--	Rubber elongation factor protein (REF)	REF/SRPP-like protein At1g67360 OS=Arabidopsis thaliana OX=3702 GN=At1g67360 PE=2 SV=1	Function unknown	hypothetical protein C3L33_13859, partial [Rhododendron williamsianum]
VaccDscaff24-augustus-gene-66.43	--	K13944|6.6e-30|pxb:103957286|K13944 LOB domain-containing protein 16 | (RefSeq) LOB domain-containing protein 16	--	Lateral organ boundaries (LOB) domain	LOB domain-containing protein 12 OS=Arabidopsis thaliana OX=3702 GN=LBD12 PE=1 SV=2	Function unknown	hypothetical protein C3L33_07127, partial [Rhododendron williamsianum]		VaccDscaff38-processed-gene-222.1	--	--	--	--	--	--	hypothetical protein C3L33_10406, partial [Rhododendron williamsianum]		VaccDscaff8-augustus-gene-166.10	--	--	--	Helix-loop-helix DNA-binding domain	Transcription factor ORG2 OS=Arabidopsis thaliana OX=3702 GN=ORG2 PE=1 SV=1	Transcription	transcription factor ORG2-like [Camellia sinensis]
VaccDscaff18-processed-gene-3.9	--	--	--	--	--	--	hypothetical protein B456_005G101900 [Gossypium raimondii]		VaccDscaff27-augustus-gene-216.20	--	K13462|9.3e-18|cam:101501224|K13462 guanine nucleotide-exchange factor | (RefSeq) brefeldin A-inhibited guanine nucleotide-exchange protein 5	--	C-terminal region of Mon2 protein	--	Function unknown	hypothetical protein C3L33_19985, partial [Rhododendron williamsianum]		VaccDscaff11-augustus-gene-280.29	--	--	--	Pollen protein Ole e 1 like	--	Function unknown	hypothetical protein C3L33_06719, partial [Rhododendron williamsianum]
VaccDscaff30-processed-gene-251.1	Coenzyme transport and metabolism	K14487|1.5e-296|rcu:8285613|K14487 auxin responsive GH3 gene family | (RefSeq) probable indole-3-acetic acid-amido synthetase GH3.1	Plant hormone signal transduction (ko04075)	GH3 auxin-responsive promoter	Probable indole-3-acetic acid-amido synthetase GH3.1 OS=Arabidopsis thaliana OX=3702 GN=GH3.1 PE=2 SV=1	Function unknown	Indole-3-acetic acid-amido synthetase [Actinidia chinensis var. chinensis]		VaccDscaff45-augustus-gene-1.25	--	--	--	--	--	--	hypothetical protein Saspl_004539 [Salvia splendens]		VaccDscaff43-augustus-gene-109.33	--	K20628|2.3e-105|sind:105166984|K20628 expansin | (RefSeq) expansin-A2	--	Expansin C-terminal domain	Expansin-A4 OS=Arabidopsis thaliana OX=3702 GN=EXPA4 PE=1 SV=1	Carbohydrate transport and metabolism	Expansin-A4 like [Actinidia chinensis var. chinensis]
VaccDscaff40-processed-gene-78.2	--	K00020|3.2e-21|mtr:MTR_8g088900|K00020 3-hydroxyisobutyrate dehydrogenase [EC:1.1.1.31] | (RefSeq) 6-phosphogluconate dehydrogenase-like protein	Valine, leucine and isoleucine degradation (ko00280)	Phosphate-induced protein 1 conserved region	Protein PHOSPHATE-INDUCED 1 OS=Nicotiana tabacum OX=4097 GN=PHI-1 PE=2 SV=1	Replication, recombination and repair	hypothetical protein C3L33_10694, partial [Rhododendron williamsianum]		VaccDscaff31-snap-gene-322.36	Posttranslational modification, protein turnover, chaperones	--	--	Glyoxal oxidase N-terminus	Aldehyde oxidase GLOX OS=Vitis pseudoreticulata OX=231512 GN=GLOX PE=2 SV=1	Function unknown	protein of unknown function DUF1929 [Cynara cardunculus var. scolymus]		VaccDscaff17-augustus-gene-164.37	--	--	--	Protein of unknown function, DUF538	--	Function unknown	hypothetical protein C3L33_22981, partial [Rhododendron williamsianum]
VaccDscaff42-augustus-gene-14.30	Secondary metabolites biosynthesis, transport and catabolism	K00660|2.1e-206|nnu:104591893|K00660 chalcone synthase [EC:2.3.1.74] | (RefSeq) chalcone synthase	Flavonoid biosynthesis (ko00941);; Circadian rhythm - plant (ko04712)	Chalcone and stilbene synthases, N-terminal domain	Chalcone synthase OS=Vitis vinifera OX=29760 GN=CHS PE=2 SV=1	Coenzyme transport and metabolism	chalcone synthase [Vaccinium ashei]		VaccDscaff39-augustus-gene-89.21	--	--	--	VQ motif	VQ motif-containing protein 22 OS=Arabidopsis thaliana OX=3702 GN=VQ22 PE=2 SV=1	Function unknown	hypothetical protein C3L33_18124, partial [Rhododendron williamsianum]		VaccDscaff4-processed-gene-193.1	--	K22683|1.0e-112|sind:105173077|K22683 aspartyl protease family protein [EC:3.4.23.-] | (RefSeq) aspartyl protease family protein 2-like	--	Xylanase inhibitor N-terminal	Protein ASPARTIC PROTEASE IN GUARD CELL 2 OS=Arabidopsis thaliana OX=3702 GN=ASPG2 PE=2 SV=1	Posttranslational modification, protein turnover, chaperones	Protein ASPARTIC PROTEASE IN GUARD CELL 2 like [Actinidia chinensis var. chinensis]
VaccDscaff16-augustus-gene-65.26	--	--	--	--	--	--	uncharacterized protein LOC117929899 [Vitis riparia]		VaccDscaff22-augustus-gene-89.31	Amino acid transport and metabolism	K16297|1.6e-203|tcc:18614573|K16297 serine carboxypeptidase-like clade II [EC:3.4.16.-] | (RefSeq) serine carboxypeptidase-like 40	--	Serine carboxypeptidase	Serine carboxypeptidase-like 40 OS=Arabidopsis thaliana OX=3702 GN=SCPL40 PE=2 SV=2	Posttranslational modification, protein turnover, chaperones	serine carboxypeptidase-like 40 [Camellia sinensis]		VaccDscaff22-augustus-gene-329.39	General function prediction only	K20728|1.1e-41|thj:104814965|K20728 vegetative storage protein 2 | (RefSeq) vegetative storage protein 2-like	MAPK signaling pathway - plant (ko04016)	HAD superfamily, subfamily IIIB (Acid phosphatase)	Acid phosphatase 1 OS=Solanum lycopersicum OX=4081 GN=APS1 PE=2 SV=1	Function unknown	hypothetical protein C3L33_04267, partial [Rhododendron williamsianum]
VaccDscaff13-augustus-gene-106.32	--	K01537|4.5e-46|jcu:105638585|K01537 P-type Ca2+ transporter type 2C [EC:7.2.2.10] | (RefSeq) calcium-transporting ATPase 2, plasma membrane-type isoform X1	--	C2 domain	Protein C2-DOMAIN ABA-RELATED 4 OS=Arabidopsis thaliana OX=3702 GN=CAR4 PE=1 SV=1	Function unknown	hypothetical protein F0562_004152 [Nyssa sinensis]		VaccDscaff12-augustus-gene-215.16	Carbohydrate transport and metabolism	K24193|1.1e-233|qsu:112030438|K24193 MFS transporter, SP family, sugar:H+ symporter | (RefSeq) sugar transport protein 5	--	Sugar (and other) transporter	Sugar transport protein 5 OS=Arabidopsis thaliana OX=3702 GN=STP5 PE=2 SV=1	Intracellular trafficking, secretion, and vesicular transport	sugar transport protein 5 [Camellia sinensis]		VaccDscaff64-augustus-gene-6.32	Secondary metabolites biosynthesis, transport and catabolism	K15397|1.1e-142|egr:104427359|K15397 3-ketoacyl-CoA synthase [EC:2.3.1.199] | (RefSeq) 3-ketoacyl-CoA synthase 20	Fatty acid elongation (ko00062);; Plant-pathogen interaction (ko04626)	FAE1/Type III polyketide synthase-like protein	3-ketoacyl-CoA synthase 11 OS=Arabidopsis thaliana OX=3702 GN=KCS11 PE=1 SV=1	Secondary metabolites biosynthesis, transport and catabolism	3-ketoacyl-CoA synthase 2-like [Camellia sinensis]
VaccDscaff16-augustus-gene-41.27	Cell motility	K20887|8.8e-298|mesc:110604516|K20887 xyloglucan glycosyltransferase 4 [EC:2.4.1.-] | (RefSeq) xyloglucan glycosyltransferase 4-like	--	Glycosyl transferase family group 2	Xyloglucan glycosyltransferase 4 OS=Arabidopsis thaliana OX=3702 GN=CSLC4 PE=1 SV=1	Cell wall/membrane/envelope biogenesis	hypothetical protein C3L33_18928, partial [Rhododendron williamsianum]		VaccDscaff45-augustus-gene-4.25	--	K10398|0.0e+00|mesc:110607222|K10398 kinesin family member 11 | (RefSeq) kinesin-like protein KIN-5B	--	Kinesin motor domain	Kinesin-like protein KIN-5B OS=Arabidopsis thaliana OX=3702 GN=KIN5B PE=2 SV=1	Cytoskeleton	Kinesin-like protein [Actinidia chinensis var. chinensis]		VaccDscaff2-processed-gene-307.31	Posttranslational modification, protein turnover, chaperones	K13993|1.6e-63|nau:109217313|K13993 HSP20 family protein | (RefSeq) 17.3 kDa class II heat shock protein-like	Protein processing in endoplasmic reticulum (ko04141)	Hsp20/alpha crystallin family	17.3 kDa class II heat shock protein OS=Solanum peruvianum OX=4082 PE=2 SV=1	Posttranslational modification, protein turnover, chaperones	small heat shock protein HSP17.7 [Vaccinium corymbosum]
VaccDscaff11-processed-gene-315.1	--	--	--	Plant protein of unknown function (DUF641)	Protein GRAVITROPIC IN THE LIGHT 1 OS=Arabidopsis thaliana OX=3702 GN=GIL1 PE=1 SV=1	Function unknown	hypothetical protein C3L33_07164, partial [Rhododendron williamsianum]		VaccDscaff106-augustus-gene-4.47	--	--	--	--	--	--	hypothetical protein C3L33_20027, partial [Rhododendron williamsianum]		VaccDscaff20-snap-gene-332.31	--	--	--	Sin3 binding region of histone deacetylase complex subunit SAP30	--	Function unknown	Histone deacetylase complex subunit like [Actinidia chinensis var. chinensis]
VaccDscaff11-snap-gene-316.47	--	K00430|3.4e-128|pxb:103948920|K00430 peroxidase [EC:1.11.1.7] | (RefSeq) cationic peroxidase 1-like	Phenylpropanoid biosynthesis (ko00940)	Peroxidase	Cationic peroxidase 1 OS=Arachis hypogaea OX=3818 GN=PNC1 PE=1 SV=2	Secondary metabolites biosynthesis, transport and catabolism	Cationic peroxidase [Actinidia chinensis var. chinensis]		VaccDscaff3-augustus-gene-400.26	--	K15210|4.5e-07|hbr:110669946|K15210 snRNA-activating protein complex subunit 3 | (RefSeq) snRNA-activating protein complex subunit-like isoform X1	--	MYB-CC type transfactor, LHEQLE motif	Myb family transcription factor PHL11 OS=Arabidopsis thaliana OX=3702 GN=PHL11 PE=1 SV=1	Transcription	myb family transcription factor PHL11 isoform X1 [Camellia sinensis]		VaccDscaff32-augustus-gene-326.31	--	K00430|7.3e-146|pop:18099141|K00430 peroxidase [EC:1.11.1.7] | (RefSeq) peroxidase 64	Phenylpropanoid biosynthesis (ko00940)	Peroxidase	Peroxidase 64 OS=Arabidopsis thaliana OX=3702 GN=PER64 PE=1 SV=1	Carbohydrate transport and metabolism	hypothetical protein C3L33_01736, partial [Rhododendron williamsianum]
VaccDscaff22-processed-gene-121.8	--	K12173|1.8e-14|gmx:100794341|K12173 BRCA1-A complex subunit BRE | (RefSeq) BRISC and BRCA1-A complex member 2	Homologous recombination (ko03440)	Thaumatin family	Thaumatin-like protein OS=Actinidia chinensis var. chinensis OX=1590841 GN=TLP PE=1 SV=2	Function unknown	hypothetical protein C3L33_08570, partial [Rhododendron williamsianum]		VaccDscaff11-processed-gene-322.3	--	K19038|1.0e-20|cann:107877330|K19038 E3 ubiquitin-protein ligase ATL41 [EC:2.3.2.27] | (RefSeq) E3 ubiquitin-protein ligase ATL41-like	--	Ring finger domain	RING-H2 finger protein ATL63 OS=Arabidopsis thaliana OX=3702 GN=ATL63 PE=2 SV=1	Posttranslational modification, protein turnover, chaperones	hypothetical protein C3L33_07107, partial [Rhododendron williamsianum]		VaccDscaff30-augustus-gene-282.25	Posttranslational modification, protein turnover, chaperones	K00799|1.3e-98|pavi:110765104|K00799 glutathione S-transferase [EC:2.5.1.18] | (RefSeq) glutathione S-transferase F11-like	Glutathione metabolism (ko00480)	Glutathione S-transferase, N-terminal domain	Glutathione S-transferase F12 OS=Arabidopsis thaliana OX=3702 GN=GSTF12 PE=1 SV=1	Posttranslational modification, protein turnover, chaperones	Glutathione S-transferase [Actinidia chinensis var. chinensis]
VaccDscaff29-snap-gene-130.29	--	K09872|3.8e-41|csat:104737734|K09872 aquaporin PIP | (RefSeq) probable aquaporin PIP1-4	--	Major intrinsic protein	Probable aquaporin PIP1-4 OS=Arabidopsis thaliana OX=3702 GN=PIP1.4 PE=1 SV=1	Inorganic ion transport and metabolism	hypothetical protein B296_00027755 [Ensete ventricosum]		VaccDscaff130-processed-gene-2.28	Signal transduction mechanisms	K01180|1.0e-119|cmax:111487562|K01180 endo-1,3(4)-beta-glucanase [EC:3.2.1.6] | (RefSeq) uncharacterized protein LOC111487562	--	Protein tyrosine and serine/threonine kinase	Proline-rich receptor-like protein kinase PERK1 OS=Arabidopsis thaliana OX=3702 GN=PERK1 PE=1 SV=1	Signal transduction mechanisms	proline-rich receptor-like protein kinase PERK1 [Camellia sinensis]		VaccDscaff6-augustus-gene-2.40	Inorganic ion transport and metabolism	K14709|9.7e-121|jre:109018780|K14709 solute carrier family 39 (zinc transporter), member 1/2/3 | (RefSeq) zinc transporter 1-like	--	ZIP Zinc transporter	Zinc transporter 1 OS=Arabidopsis thaliana OX=3702 GN=ZIP1 PE=2 SV=1	Inorganic ion transport and metabolism	hypothetical protein C3L33_09631, partial [Rhododendron williamsianum]
VaccDscaff14-augustus-gene-92.14	Cell wall/membrane/envelope biogenesis	K13415|3.5e-85|han:110929858|K13415 protein brassinosteroid insensitive 1 [EC:2.7.10.1 2.7.11.1] | (RefSeq) systemin receptor SR160-like	Plant hormone signal transduction (ko04075)	Protein kinase domain	MDIS1-interacting receptor like kinase 2 OS=Arabidopsis thaliana OX=3702 GN=MIK2 PE=1 SV=3	Signal transduction mechanisms	MDIS1-interacting receptor like kinase 2-like [Camellia sinensis]		VaccDscaff454-augustus-gene-0.22	--	--	--	--	--	--	hypothetical protein CK203_078868 [Vitis vinifera]		VaccDscaff12-augustus-gene-152.19	--	--	--	Plastocyanin-like domain	Blue copper protein OS=Pisum sativum OX=3888 PE=2 SV=1	Function unknown	hypothetical protein HYC85_008191 [Camellia sinensis]
VaccDscaff7-augustus-gene-194.29	Function unknown	K07192|2.2e-123|jcu:105637592|K07192 flotillin | (RefSeq) flotillin-like protein 4	--	SPFH domain / Band 7 family	Flotillin-like protein 4 OS=Medicago truncatula OX=3880 GN=FLOT4 PE=2 SV=1	--	Flotillin [Parasponia andersonii]		VaccDscaff22-augustus-gene-46.36	--	K20641|2.4e-11|cvr:CHLNCDRAFT_59250|K20641 Rho GTPase-activating protein 20 | (RefSeq) hypothetical protein	--	SBP domain	Squamosa promoter-binding-like protein 8 OS=Arabidopsis thaliana OX=3702 GN=SPL8 PE=1 SV=2	Transcription	hypothetical protein HYC85_010838 [Camellia sinensis]		VaccDscaff24-augustus-gene-78.36	--	K14491|2.2e-20|thj:104823648|K14491 two-component response regulator ARR-B family | (RefSeq) two-component response regulator ARR14 isoform X1	Plant hormone signal transduction (ko04075)	Myb-like DNA-binding domain	Transcription factor BOA OS=Arabidopsis thaliana OX=3702 GN=BOA PE=2 SV=1	Transcription	Transcription factor LUX like [Actinidia chinensis var. chinensis]
VaccDscaff23-augustus-gene-32.36	--	K14430|1.8e-08|gsl:Gasu_35240|K14430 phosphate transporter | (RefSeq) divalent anion:Na+ symporter, DASS family	--	SPX domain	SPX domain-containing protein 2 OS=Arabidopsis thaliana OX=3702 GN=SPX2 PE=2 SV=1	Inorganic ion transport and metabolism	hypothetical protein C3L33_05376, partial [Rhododendron williamsianum]		VaccDscaff30-snap-gene-128.20	Cell wall/membrane/envelope biogenesis	K01180|6.9e-76|cmax:111487562|K01180 endo-1,3(4)-beta-glucanase [EC:3.2.1.6] | (RefSeq) uncharacterized protein LOC111487562	--	Protein tyrosine and serine/threonine kinase	Probable receptor-like serine/threonine-protein kinase At4g34500 OS=Arabidopsis thaliana OX=3702 GN=At4g34500 PE=2 SV=1	Signal transduction mechanisms	Receptor-like serine/threonine-protein kinase [Actinidia chinensis var. chinensis]		VaccDscaff22-processed-gene-276.13	--	--	--	Tim17/Tim22/Tim23/Pmp24 family	Outer envelope pore protein 16, chloroplastic OS=Pisum sativum OX=3888 GN=OEP16 PE=1 SV=1	Posttranslational modification, protein turnover, chaperones	hypothetical protein C3L33_04560, partial [Rhododendron williamsianum]
VaccDscaff15-augustus-gene-264.23	--	K00521|8.0e-36|cmos:111447866|K00521 ferric-chelate reductase [EC:1.16.1.7] | (RefSeq) ferric reduction oxidase 7, chloroplastic-like	--	No apical meristem (NAM) protein	NAC domain-containing protein 90 OS=Arabidopsis thaliana OX=3702 GN=NAC090 PE=1 SV=1	Transcription	hypothetical protein TEA_007753 [Camellia sinensis var. sinensis]		VaccDscaff202-processed-gene-1.14	--	K00924|2.6e-11|aof:109835084|K00924 kinase [EC:2.7.1.-] | (RefSeq) candidapepsin-7-like	--	Domain of unknown function (DUF4283)	--	Function unknown	uncharacterized protein LOC114296890 [Camellia sinensis]		VaccDscaff18-snap-gene-218.22	--	K12472|1.1e-36|cqi:110701739|K12472 epidermal growth factor receptor substrate 15 | (RefSeq) GATA zinc finger domain-containing protein 14-like	Endocytosis (ko04144)	BURP domain	BURP domain protein RD22 OS=Arabidopsis thaliana OX=3702 GN=RD22 PE=2 SV=1	Function unknown	hypothetical protein C3L33_08907, partial [Rhododendron williamsianum]
VaccDscaff7-processed-gene-79.3	Amino acid transport and metabolism	K01626|2.9e-249|mesc:110609708|K01626 3-deoxy-7-phosphoheptulonate synthase [EC:2.5.1.54] | (RefSeq) phospho-2-dehydro-3-deoxyheptonate aldolase 1, chloroplastic-like	Phenylalanine, tyrosine and tryptophan biosynthesis (ko00400);; Biosynthesis of amino acids (ko01230)	Class-II DAHP synthetase family	Phospho-2-dehydro-3-deoxyheptonate aldolase 1, chloroplastic OS=Solanum tuberosum OX=4113 GN=SHKA PE=1 SV=2	Amino acid transport and metabolism	phospho-2-dehydro-3-deoxyheptonate aldolase 1, chloroplastic-like [Camellia sinensis]		VaccDscaff1-processed-gene-30.7	--	--	--	--	--	--	uncharacterized protein LOC105171532 [Sesamum indicum]		VaccDscaff20-augustus-gene-147.20	General function prediction only	K12116|0.0e+00|gmx:100301889|K12116 flavin-binding kelch repeat F-box protein 1 | (RefSeq) FKF1; circadian clock-associated FKF1	Circadian rhythm - plant (ko04712)	Galactose oxidase, central domain	Adagio protein 3 OS=Arabidopsis thaliana OX=3702 GN=ADO3 PE=1 SV=1	Posttranslational modification, protein turnover, chaperones	putative LOV domain-containing protein [Rhododendron tomentosum]
VaccDscaff30-augustus-gene-111.32	General function prediction only	K07071|3.8e-132|jre:108986994|K07071 uncharacterized protein | (RefSeq) epimerase family protein SDR39U1 homolog, chloroplastic	--	Domain of unknown function (DUF1731)	Epimerase family protein SDR39U1 homolog, chloroplastic OS=Arabidopsis thaliana OX=3702 GN=GC1 PE=2 SV=2	Nucleotide transport and metabolism	hypothetical protein F0562_028520 [Nyssa sinensis]		VaccDscaff31-augustus-gene-2.33	General function prediction only	--	--	NAD(P)H-binding	Uncharacterized protein At1g32220, chloroplastic OS=Arabidopsis thaliana OX=3702 GN=At1g32220 PE=1 SV=1	--	hypothetical protein C3L33_18687, partial [Rhododendron williamsianum]		VaccDscaff13-augustus-gene-44.45	--	--	--	Leucine rich repeat	--	Function unknown	Leucine-rich repeat receptor-like protein kinase [Actinidia chinensis var. chinensis]
VaccDscaff18-processed-gene-377.0	Posttranslational modification, protein turnover, chaperones	K13993|3.1e-48|tcc:18600899|K13993 HSP20 family protein | (RefSeq) 18.1 kDa class I heat shock protein	Protein processing in endoplasmic reticulum (ko04141)	Hsp20/alpha crystallin family	18.1 kDa class I heat shock protein (Fragment) OS=Medicago sativa OX=3879 GN=HSP18.1 PE=2 SV=1	Posttranslational modification, protein turnover, chaperones	hypothetical protein C3L33_19030, partial [Rhododendron williamsianum]		VaccDscaff43-augustus-gene-90.26	--	K00430|7.3e-141|mesc:110605844|K00430 peroxidase [EC:1.11.1.7] | (RefSeq) peroxidase 4-like	Phenylpropanoid biosynthesis (ko00940)	Peroxidase	Peroxidase 4 OS=Vitis vinifera OX=29760 GN=GSVIVT00023967001 PE=1 SV=1	Secondary metabolites biosynthesis, transport and catabolism	Peroxidase [Actinidia chinensis var. chinensis]		NewGene_3030	--	--	--	--	CCG-binding protein 1 OS=Arabidopsis thaliana OX=3702 GN=MEE14 PE=1 SV=1	--	hypothetical protein HYC85_009626 [Camellia sinensis]
VaccDscaff2-augustus-gene-439.27	--	K09422|1.6e-114|vvi:100233133|K09422 transcription factor MYB, plant | (RefSeq) MYB4A; flavonoid-related R2R3 MYB 4a repressor transcription factor	--	Myb-like DNA-binding domain	Myb-related protein 308 OS=Antirrhinum majus OX=4151 GN=MYB308 PE=2 SV=1	--	MYB transcriptional factor [Vaccinium corymbosum]		VaccDscaff4-augustus-gene-397.37	--	--	--	Plastocyanin-like domain	Blue copper protein 1a OS=Medicago truncatula OX=3880 GN=MTR_7g086140 PE=2 SV=1	Function unknown	Lamin-like protein [Actinidia chinensis var. chinensis]		VaccDscaff20-augustus-gene-322.39	Cell wall/membrane/envelope biogenesis	K13430|4.6e-33|mdm:103421442|K13430 serine/threonine-protein kinase PBS1 [EC:2.7.11.1] | (RefSeq) probable serine/threonine-protein kinase PBL7 isoform X2	Plant-pathogen interaction (ko04626)	Protein tyrosine and serine/threonine kinase	Probable LRR receptor-like serine/threonine-protein kinase At1g63430 OS=Arabidopsis thaliana OX=3702 GN=At1g63430 PE=1 SV=1	Signal transduction mechanisms	hypothetical protein C3L33_16016, partial [Rhododendron williamsianum]
VaccDscaff12-augustus-gene-116.38	Lipid transport and metabolism	K06129|5.6e-43|csl:COCSUDRAFT_65109|K06129 lysophospholipase III [EC:3.1.1.5] | (RefSeq) Lecithin:cholesterol acyltransferase	Glycerophospholipid metabolism (ko00564)	Lecithin:cholesterol acyltransferase	Lecithin-cholesterol acyltransferase-like 1 OS=Arabidopsis thaliana OX=3702 GN=LCAT1 PE=2 SV=1	Lipid transport and metabolism	hypothetical protein C3L33_10833, partial [Rhododendron williamsianum]		VaccDscaff20-processed-gene-283.6	--	K13457|2.0e-108|zju:107414247|K13457 disease resistance protein RPM1 | (RefSeq) disease resistance protein RPM1-like	Plant-pathogen interaction (ko04626)	NB-ARC domain	Putative disease resistance RPP13-like protein 3 OS=Arabidopsis thaliana OX=3702 GN=RPP13L3 PE=3 SV=1	Signal transduction mechanisms	hypothetical protein C3L33_17700, partial [Rhododendron williamsianum]		VaccDscaff21-snap-gene-354.40	Posttranslational modification, protein turnover, chaperones	K09529|1.3e-117|cit:102612826|K09529 DnaJ homolog subfamily C member 9 | (RefSeq) chaperone protein dnaJ 6	--	DnaJ domain	Chaperone protein dnaJ 6 OS=Arabidopsis thaliana OX=3702 GN=ATJ6 PE=2 SV=1	Posttranslational modification, protein turnover, chaperones	Chaperone protein like [Actinidia chinensis var. chinensis]
VaccDscaff34-snap-gene-79.19	--	K13065|2.3e-82|dzi:111288103|K13065 shikimate O-hydroxycinnamoyltransferase [EC:2.3.1.133] | (RefSeq) vinorine synthase-like	Phenylpropanoid biosynthesis (ko00940);; Flavonoid biosynthesis (ko00941);; Stilbenoid, diarylheptanoid and gingerol biosynthesis (ko00945)	Transferase family	Stemmadenine O-acetyltransferase OS=Catharanthus roseus OX=4058 GN=SAT PE=1 SV=1	Function unknown	hypothetical protein C3L33_00568, partial [Rhododendron williamsianum]		VaccDscaff6-augustus-gene-283.20	--	--	--	Filament-like plant protein, long coiled-coil	Filament-like plant protein 3 OS=Arabidopsis thaliana OX=3702 GN=FPP3 PE=1 SV=2	Function unknown	hypothetical protein C3L33_18366, partial [Rhododendron williamsianum]		VaccDscaff6-processed-gene-422.17	Cell wall/membrane/envelope biogenesis;; Cell cycle control, cell division, chromosome partitioning;; Signal transduction mechanisms	K08900|6.4e-107|nta:107786408|K08900 mitochondrial chaperone BCS1 | (RefSeq) AAA-ATPase At4g25835-like	--	Domain associated at C-terminal with AAA	AAA-ATPase At5g57480 OS=Arabidopsis thaliana OX=3702 GN=At5g57480 PE=3 SV=1	Posttranslational modification, protein turnover, chaperones	hypothetical protein F0562_030584 [Nyssa sinensis]
VaccDscaff35-augustus-gene-206.18	--	--	--	Plant protein of unknown function (DUF936)	--	Function unknown	Protein of unknown function DUF936, plant protein [Actinidia chinensis var. chinensis]		VaccDscaff12-snap-gene-46.59	Coenzyme transport and metabolism;; Energy production and conversion	K09838|2.0e-11|mpp:MICPUCDRAFT_19991|K09838 zeaxanthin epoxidase [EC:1.14.15.21] | (RefSeq) ZEP1; zeaxanthin epoxidase	Carotenoid biosynthesis (ko00906)	FAD binding domain	Monooxygenase 2 OS=Arabidopsis thaliana OX=3702 GN=MO2 PE=2 SV=1	Energy production and conversion	hypothetical protein C3L33_11189, partial [Rhododendron williamsianum]		VaccDscaff2-augustus-gene-166.22	Secondary metabolites biosynthesis, transport and catabolism	--	--	Dienelactone hydrolase family	--	Secondary metabolites biosynthesis, transport and catabolism	hypothetical protein C3L33_21727, partial [Rhododendron williamsianum]
VaccDscaff44-processed-gene-237.14	Function unknown	K15015|6.1e-17|aip:107609646|K15015 solute carrier family 32 (vesicular inhibitory amino acid transporter) | (RefSeq) uncharacterized protein LOC107609646 isoform X1	--	--	IQ domain-containing protein IQM2 OS=Arabidopsis thaliana OX=3702 GN=IQM2 PE=2 SV=1	Function unknown	hypothetical protein C3L33_05764, partial [Rhododendron williamsianum]		VaccDscaff144-augustus-gene-0.30	--	--	--	--	--	Function unknown	hypothetical protein C3L33_13220, partial [Rhododendron williamsianum]		VaccDscaff19-processed-gene-221.1	--	--	--	--	--	Function unknown	hypothetical protein C3L33_06206, partial [Rhododendron williamsianum]
VaccDscaff33-snap-gene-313.37	--	--	--	--	--	Function unknown	hypothetical protein C3L33_03568, partial [Rhododendron williamsianum]		VaccDscaff6-snap-gene-320.34		K13418|1.6e-282|pxb:103931945|K13418 somatic embryogenesis receptor kinase 1 [EC:2.7.10.1 2.7.11.1] | (RefSeq) somatic embryogenesis receptor kinase 2	--	Protein kinase domain	LRR receptor kinase BAK1 OS=Oryza sativa subsp. indica OX=39946 GN=BAK1 PE=2 SV=1	Signal transduction mechanisms	LRR receptor kinase BAK1 [Camellia sinensis]		VaccDscaff160-processed-gene-1.8	Cell wall/membrane/envelope biogenesis;; Cell cycle control, cell division, chromosome partitioning;; Signal transduction mechanisms	K08900|4.8e-102|nta:107786408|K08900 mitochondrial chaperone BCS1 | (RefSeq) AAA-ATPase At4g25835-like	--	Domain associated at C-terminal with AAA	AAA-ATPase At5g57480 OS=Arabidopsis thaliana OX=3702 GN=At5g57480 PE=3 SV=1	Posttranslational modification, protein turnover, chaperones	hypothetical protein F0562_030584 [Nyssa sinensis]
Vaccinium_corymbosum_newGene_5600	--	K00889|8.0e-41|dcr:108218789|K00889 1-phosphatidylinositol-4-phosphate 5-kinase [EC:2.7.1.68] | (RefSeq) phosphatidylinositol 4-phosphate 5-kinase 6-like	Inositol phosphate metabolism (ko00562);; Phosphatidylinositol signaling system (ko04070);; Endocytosis (ko04144)	Domain of unknown function	Protein ACCELERATED CELL DEATH 6 OS=Arabidopsis thaliana OX=3702 GN=ACD6 PE=1 SV=1	Cell wall/membrane/envelope biogenesis	hypothetical protein C3L33_13122, partial [Rhododendron williamsianum]		VaccDscaff31-augustus-gene-301.42	--	K09377|2.2e-108|vvi:100253922|K09377 cysteine and glycine-rich protein | (RefSeq) LIM domain-containing protein WLIM1	--	LIM domain	LIM domain-containing protein WLIM1 OS=Arabidopsis thaliana OX=3702 GN=WLIM1 PE=1 SV=1	--	PREDICTED: LIM domain-containing protein WLIM1 [Vitis vinifera]		VaccDscaff9-augustus-gene-397.28	--	--	--	--	--	Function unknown	hypothetical protein POPTR_003G061200 [Populus trichocarpa]
VaccDscaff21-processed-gene-345.11	--	--	--	--	--	--	hypothetical protein F0562_017392 [Nyssa sinensis]		VaccDscaff22-augustus-gene-234.20	General function prediction only	K08857|0.0e+00|vvi:100258125|K08857 NIMA (never in mitosis gene a)-related kinase 1/4/5 [EC:2.7.11.1] | (RefSeq) serine/threonine-protein kinase Nek5	--	Protein kinase domain	Serine/threonine-protein kinase Nek5 OS=Arabidopsis thaliana OX=3702 GN=NEK5 PE=1 SV=1	Signal transduction mechanisms	hypothetical protein C3L33_04745, partial [Rhododendron williamsianum]		VaccDscaff38-augustus-gene-271.25	--	--	--	Glycine rich protein family	--	--	hypothetical protein C3L33_10144, partial [Rhododendron williamsianum]
VaccDscaff40-snap-gene-195.24	--	K09422|6.4e-32|jre:108998963|K09422 transcription factor MYB, plant | (RefSeq) transcription factor CPC-like isoform X1	--	Myb-like DNA-binding domain	Transcription factor TRY OS=Arabidopsis thaliana OX=3702 GN=TRY PE=1 SV=1	Transcription	hypothetical protein HYC85_016441 [Camellia sinensis]		VaccDscaff20-processed-gene-328.3	--	--	--	Protein of unknown function (DUF1336)	Protein ENHANCED DISEASE RESISTANCE 2-like OS=Arabidopsis thaliana OX=3702 GN=EDR2L PE=2 SV=1	Function unknown	Protein ENHANCED DISEASE RESISTANCE like [Actinidia chinensis var. chinensis]		VaccDscaff38-augustus-gene-73.22	--	K20558|1.9e-27|adu:107495120|K20558 transcription factor SPEECHLESS | (RefSeq) transcription factor SPEECHLESS	MAPK signaling pathway - plant (ko04016)	Helix-loop-helix DNA-binding domain	Transcription factor bHLH94 OS=Arabidopsis thaliana OX=3702 GN=BHLH94 PE=1 SV=2	Transcription	hypothetical protein C3L33_18076, partial [Rhododendron williamsianum]
VaccDscaff13-snap-gene-84.32	--	K16812|1.5e-14|mus:103994687|K16812 targeting protein for Xklp2 | (RefSeq) protein TPX2-like isoform X1	--	Targeting protein for Xklp2 (TPX2) domain	--	Function unknown	hypothetical protein C3L33_01473, partial [Rhododendron williamsianum]		VaccDscaff2-snap-gene-68.28	Coenzyme transport and metabolism;; Energy production and conversion	K06126|3.3e-160|cit:102630098|K06126 ubiquinone biosynthesis monooxygenase Coq6 [EC:1.14.13.-] | (RefSeq) ubiquinone biosynthesis monooxygenase COQ6, mitochondrial isoform X1	Ubiquinone and other terpenoid-quinone biosynthesis (ko00130)	FAD binding domain	--	--	ubiquinone biosynthesis monooxygenase COQ6, mitochondrial isoform X3 [Camellia sinensis]		VaccDscaff93-processed-gene-4.5	--	--	--	Membrane bound O-acyl transferase family	Long-chain-alcohol O-fatty-acyltransferase OS=Simmondsia chinensis OX=3999 PE=1 SV=1	Function unknown	long-chain-alcohol O-fatty-acyltransferase-like [Camellia sinensis]
VaccDscaff6-snap-gene-176.27	Carbohydrate transport and metabolism	K08235|6.4e-104|ini:109187679|K08235 xyloglucan:xyloglucosyl transferase [EC:2.4.1.207] | (RefSeq) xyloglucan endotransglucosylase/hydrolase protein 15-like	--	Glycosyl hydrolases family 16	Xyloglucan endotransglucosylase/hydrolase protein 22 OS=Arabidopsis thaliana OX=3702 GN=XTH22 PE=1 SV=1	Carbohydrate transport and metabolism	xyloglucan endotransglucosylase/hydrolase 7 [Actinidia deliciosa]		VaccDscaff28-augustus-gene-234.24	--	K10525|7.5e-85|oeu:111399032|K10525 allene oxide cyclase [EC:5.3.99.6] | (RefSeq) allene oxide cyclase, chloroplastic-like	alpha-Linolenic acid metabolism (ko00592)	Allene oxide cyclase	Allene oxide cyclase 3, chloroplastic OS=Arabidopsis thaliana OX=3702 GN=AOC3 PE=2 SV=1	Function unknown	hypothetical protein C3L33_17049, partial [Rhododendron williamsianum]		VaccDscaff934-processed-gene-0.0	Carbohydrate transport and metabolism	K01179|3.8e-106|sind:105179137|K01179 endoglucanase [EC:3.2.1.4] | (RefSeq) endoglucanase 6	Starch and sucrose metabolism (ko00500)	Glycosyl hydrolase family 9	Endoglucanase 6 OS=Arabidopsis thaliana OX=3702 GN=At1g64390 PE=2 SV=2	Carbohydrate transport and metabolism	hypothetical protein C3L33_08485, partial [Rhododendron williamsianum]
VaccDscaff19-snap-gene-286.43	Energy production and conversion	K22395|1.9e-172|nau:109214673|K22395 cinnamyl-alcohol dehydrogenase [EC:1.1.1.195] | (RefSeq) berberine bridge enzyme-like 28	Phenylpropanoid biosynthesis (ko00940)	FAD binding domain	Berberine bridge enzyme-like 23 OS=Arabidopsis thaliana OX=3702 GN=At5g44360 PE=2 SV=1	Energy production and conversion	hypothetical protein F0562_013560 [Nyssa sinensis]		VaccDscaff19-augustus-gene-309.53	--	K13464|4.7e-08|mus:103996636|K13464 jasmonate ZIM domain-containing protein | (RefSeq) protein TIFY 9	Plant hormone signal transduction (ko04075)	tify domain	Protein TIFY 5A OS=Arabidopsis thaliana OX=3702 GN=TIFY5A PE=1 SV=1	Function unknown	Protein TIFY 5A [Morella rubra]		VaccDscaff42-augustus-gene-96.24	Carbohydrate transport and metabolism	K19355|3.0e-206|qsu:112016006|K19355 mannan endo-1,4-beta-mannosidase [EC:3.2.1.78] | (RefSeq) mannan endo-1,4-beta-mannosidase 7	Fructose and mannose metabolism (ko00051)	Cellulase (glycosyl hydrolase family 5)	Mannan endo-1,4-beta-mannosidase 7 OS=Arabidopsis thaliana OX=3702 GN=MAN7 PE=2 SV=1	Carbohydrate transport and metabolism	mannan endo-1,4-beta-mannosidase 7-like [Camellia sinensis]
VaccDscaff22-processed-gene-76.4	--	--	--	--	--	--	Transcription termination factor like [Actinidia chinensis var. chinensis]		VaccDscaff46-processed-gene-142.14	Posttranslational modification, protein turnover, chaperones	K13993|1.8e-68|dzi:111285890|K13993 HSP20 family protein | (RefSeq) 17.3 kDa class I heat shock protein-like	Protein processing in endoplasmic reticulum (ko04141)	Hsp20/alpha crystallin family	18.5 kDa class I heat shock protein OS=Glycine max OX=3847 GN=HSP18.5-C PE=3 SV=1	Posttranslational modification, protein turnover, chaperones	--		VaccDscaff6-snap-gene-103.30	Translation, ribosomal structure and biogenesis	K02933|1.6e-97|mdm:103442604|K02933 large subunit ribosomal protein L6 | (RefSeq) 50S ribosomal protein L6, chloroplastic-like	Ribosome (ko03010)	Ribosomal protein L6	50S ribosomal protein L6, chloroplastic OS=Arabidopsis thaliana OX=3702 GN=RPL6 PE=2 SV=1	Translation, ribosomal structure and biogenesis	hypothetical protein HYC85_014988 [Camellia sinensis]
VaccDscaff6-processed-gene-145.6	--	K03676|1.1e-38|rcu:8288062|K03676 glutaredoxin 3 | (RefSeq) glutaredoxin-C9	--	Glutaredoxin	Glutaredoxin-C9 OS=Arabidopsis thaliana OX=3702 GN=GRXC9 PE=1 SV=1	Posttranslational modification, protein turnover, chaperones	Glutaredoxin-C9 like [Actinidia chinensis var. chinensis]		VaccDscaff6-snap-gene-2.42	--	--	--	LEM3 (ligand-effect modulator 3) family / CDC50 family	ALA-interacting subunit 3 OS=Arabidopsis thaliana OX=3702 GN=ALIS3 PE=1 SV=1	--	hypothetical protein C3L33_09626, partial [Rhododendron williamsianum]		VaccDscaff31-augustus-gene-319.44	--	K17500|2.4e-40|nto:104085001|K17500 integrin-linked kinase-associated serine/threonine phosphatase 2C [EC:3.1.3.16] | (RefSeq) WAT1-related protein At3g18200 isoform X1	--	EamA-like transporter family	Protein WALLS ARE THIN 1 OS=Arabidopsis thaliana OX=3702 GN=WAT1 PE=1 SV=1	Function unknown	Protein WALLS ARE THIN like [Actinidia chinensis var. chinensis]
VaccDscaff16-augustus-gene-386.40	Cell cycle control, cell division, chromosome partitioning;; Inorganic ion transport and metabolism;; Cell wall/membrane/envelope biogenesis	K19791|3.5e-194|oeu:111379234|K19791 iron transport multicopper oxidase | (RefSeq) L-ascorbate oxidase homolog	--	Multicopper oxidase	L-ascorbate oxidase homolog OS=Brassica napus OX=3708 GN=Bp10 PE=2 SV=1	Secondary metabolites biosynthesis, transport and catabolism	hypothetical protein C3L33_09434, partial [Rhododendron williamsianum]		VaccDscaff13-augustus-gene-18.30	--	K10703|1.5e-108|psom:113283320|K10703 very-long-chain (3R)-3-hydroxyacyl-CoA dehydratase [EC:4.2.1.134] | (RefSeq) very-long-chain (3R)-3-hydroxyacyl-CoA dehydratase PASTICCINO 2-like	Fatty acid elongation (ko00062);; Biosynthesis of unsaturated fatty acids (ko01040);; Fatty acid metabolism (ko01212)	Protein tyrosine phosphatase-like protein, PTPLA	Very-long-chain (3R)-3-hydroxyacyl-CoA dehydratase PASTICCINO 2 OS=Arabidopsis thaliana OX=3702 GN=PAS2 PE=1 SV=1	Lipid transport and metabolism	hypothetical protein F0562_003152 [Nyssa sinensis]		VaccDscaff31-processed-gene-156.11	Posttranslational modification, protein turnover, chaperones;; Signal transduction mechanisms	--	--	ACT domain	ACT domain-containing protein ACR2 OS=Arabidopsis thaliana OX=3702 GN=ACR2 PE=4 SV=1	Function unknown	hypothetical protein C3L33_22855, partial [Rhododendron williamsianum]
Vaccinium_corymbosum_newGene_8174	--	K23452|1.2e-36|ath:AT1G22380|K23452 UDP-glucosyltransferase 85A [EC:2.4.1.-] | (RefSeq) UGT85A3; UDP-glucosyl transferase 85A3	Zeatin biosynthesis (ko00908)	UDP-glucoronosyl and UDP-glucosyl transferase	UDP-glycosyltransferase 85A3 OS=Arabidopsis thaliana OX=3702 GN=UGT85A3 PE=2 SV=2	--	7-deoxyloganetin glucosyltransferase [Actinidia chinensis var. chinensis]		VaccDscaff1-augustus-gene-444.28	--	K16732|1.2e-252|qsu:112012954|K16732 protein regulator of cytokinesis 1 | (RefSeq) 65-kDa microtubule-associated protein 1-like	--	Microtubule associated protein (MAP65/ASE1 family)	65-kDa microtubule-associated protein 1 OS=Arabidopsis thaliana OX=3702 GN=MAP65-1 PE=1 SV=1	--	Microtubule-associated protein [Actinidia chinensis var. chinensis]		VaccDscaff19-snap-gene-359.29	--	--	--	--	--	Function unknown	hypothetical protein C3L33_07054, partial [Rhododendron williamsianum]
VaccDscaff169-processed-gene-2.21	Lipid transport and metabolism	K20506|3.7e-97|egu:105060863|K20506 tuliposide A-converting enzyme [EC:4.2.99.22] | (RefSeq) tuliposide A-converting enzyme 2, chloroplastic-like	--	alpha/beta hydrolase fold	Probable carboxylesterase 2 OS=Arabidopsis thaliana OX=3702 GN=CXE2 PE=2 SV=1	Defense mechanisms	Carboxylesterase [Actinidia chinensis var. chinensis]		VaccDscaff24-augustus-gene-122.25	--	K13464|4.7e-08|mus:103996636|K13464 jasmonate ZIM domain-containing protein | (RefSeq) protein TIFY 9	Plant hormone signal transduction (ko04075)	tify domain	Protein TIFY 5A OS=Arabidopsis thaliana OX=3702 GN=TIFY5A PE=1 SV=1	Function unknown	Protein TIFY 5A [Morella rubra]		VaccDscaff4-augustus-gene-328.28	Translation, ribosomal structure and biogenesis	K05929|2.1e-63|nnu:104601850|K05929 phosphoethanolamine N-methyltransferase [EC:2.1.1.103] | (RefSeq) phosphoethanolamine N-methyltransferase-like	Glycerophospholipid metabolism (ko00564)	Methyltransferase domain	Phosphoethanolamine N-methyltransferase 1 OS=Arabidopsis thaliana OX=3702 GN=NMT1 PE=1 SV=1	Function unknown	phosphomethylethanolamine N-methyltransferase-like isoform X2 [Camellia sinensis]
VaccDscaff6-processed-gene-355.7	--	--	--	Agglutinin domain	--	Function unknown	hypothetical protein C3L33_04613, partial [Rhododendron williamsianum]		VaccDscaff22-processed-gene-119.2	--	--	--	Brf1-like TBP-binding domain	--	--	hypothetical protein C3L33_08555, partial [Rhododendron williamsianum]		VaccDscaff74-augustus-gene-2.33	--	K01285|6.9e-234|hbr:110652170|K01285 lysosomal Pro-X carboxypeptidase [EC:3.4.16.2] | (RefSeq) lysosomal Pro-X carboxypeptidase	--	Serine carboxypeptidase S28	Probable serine protease EDA2 OS=Arabidopsis thaliana OX=3702 GN=EDA2 PE=2 SV=2	Function unknown	lysosomal Pro-X carboxypeptidase [Camellia sinensis]
VaccDscaff29-augustus-gene-316.31	--	K15414|1.8e-59|jre:108982060|K15414 complement component 1 Q subcomponent-binding protein, mitochondrial | (RefSeq) uncharacterized protein LOC108982060	--	Mitochondrial glycoprotein	--	Function unknown	hypothetical protein C3L33_02231, partial [Rhododendron williamsianum]		VaccDscaff39-augustus-gene-241.30	Posttranslational modification, protein turnover, chaperones	K16292|5.1e-137|jre:108997808|K16292 KDEL-tailed cysteine endopeptidase [EC:3.4.22.-] | (RefSeq) senescence-specific cysteine protease SAG39-like	--	Papain family cysteine protease	Senescence-specific cysteine protease SAG39 OS=Oryza sativa subsp. indica OX=39946 GN=OsI_14861 PE=3 SV=1	Posttranslational modification, protein turnover, chaperones	Senescence-specific cysteine protease [Actinidia chinensis var. chinensis]		VaccDscaff3-processed-gene-100.6	--	--	--	Extensin-like region	--	--	--
VaccDscaff23-processed-gene-326.0	--	K09422|4.7e-49|ccav:112500741|K09422 transcription factor MYB, plant | (RefSeq) transcription factor MYB73-like	--	Myb-like DNA-binding domain	Transcription factor MYB44 OS=Arabidopsis thaliana OX=3702 GN=MYB44 PE=1 SV=1	--	Transcription factor like [Actinidia chinensis var. chinensis]		VaccDscaff39-snap-gene-183.34	General function prediction only	--	--	Protein of unknown function (DUF1295)	--	Function unknown	hypothetical protein C3L33_04914, partial [Rhododendron williamsianum]		VaccDscaff1-processed-gene-199.5	--	--	--	Myb/SANT-like DNA-binding domain	--	Function unknown	hypothetical protein C3L33_12356, partial [Rhododendron williamsianum]
VaccDscaff8-augustus-gene-35.40	Amino acid transport and metabolism	K00815|2.0e-191|mesc:110611399|K00815 tyrosine aminotransferase [EC:2.6.1.5] | (RefSeq) probable aminotransferase TAT2	Ubiquinone and other terpenoid-quinone biosynthesis (ko00130);; Cysteine and methionine metabolism (ko00270);; Tyrosine metabolism (ko00350);; Phenylalanine metabolism (ko00360);; Phenylalanine, tyrosine and tryptophan biosynthesis (ko00400);; Isoquinoline alkaloid biosynthesis (ko00950);; Tropane, piperidine and pyridine alkaloid biosynthesis (ko00960)	Aminotransferase class I and II	Probable aminotransferase TAT2 OS=Arabidopsis thaliana OX=3702 GN=At5g53970 PE=2 SV=1	Amino acid transport and metabolism	aromatic amino acid aminotransferase 1 [Camellia sinensis]		VaccDscaff25-augustus-gene-45.27	--	K01184|1.7e-10|hbr:110656842|K01184 polygalacturonase [EC:3.2.1.15] | (RefSeq) polygalacturonase QRT2-like	Pentose and glucuronate interconversions (ko00040)	Tetraspanin family	Protein TORNADO 2 OS=Arabidopsis thaliana OX=3702 GN=TRN2 PE=1 SV=1	Function unknown	hypothetical protein C3L33_23182, partial [Rhododendron williamsianum]		VaccDscaff4-augustus-gene-403.21	--	--	--	--	Protein POST-ILLUMINATION CHLOROPHYLL FLUORESCENCE INCREASE, chloroplastic OS=Arabidopsis thaliana OX=3702 GN=PIFI PE=2 SV=1	Function unknown	uncharacterized protein LOC114284282 [Camellia sinensis]
VaccDscaff15-augustus-gene-360.46	--	K09422|2.6e-72|jre:108989295|K09422 transcription factor MYB, plant | (RefSeq) transcription factor MYB30-like	--	Myb-like DNA-binding domain	Transcription factor MYB14 OS=Arabidopsis thaliana OX=3702 GN=MYB14 PE=2 SV=1	--	transcription factor MYB14-like [Camellia sinensis]		VaccDscaff22-snap-gene-259.39	General function prediction only	K03857|3.9e-09|ini:109192022|K03857 phosphatidylinositol N-acetylglucosaminyltransferase subunit A [EC:2.4.1.198] | (RefSeq) phosphatidylinositol N-acetylglucosaminyltransferase subunit A-like	Glycosylphosphatidylinositol (GPI)-anchor biosynthesis (ko00563)	von Willebrand factor type A domain	E3 ubiquitin-protein ligase WAV3 OS=Arabidopsis thaliana OX=3702 GN=WAV3 PE=1 SV=1	Posttranslational modification, protein turnover, chaperones	hypothetical protein C3L33_04655, partial [Rhododendron williamsianum]		VaccDscaff17-augustus-gene-56.36	Carbohydrate transport and metabolism	K09753|3.1e-07|dosa:Os09t0262000-00|K09753 cinnamoyl-CoA reductase [EC:1.2.1.44] | (RefSeq) Os09g0262000; Similar to Cinnamoyl CoA reductase.	Phenylpropanoid biosynthesis (ko00940)	ATPase family associated with various cellular activities (AAA)	Ribulose bisphosphate carboxylase/oxygenase activase 1, chloroplastic OS=Larrea tridentata OX=66636 GN=RCA1 PE=1 SV=1	Posttranslational modification, protein turnover, chaperones	chloroplast ribulose bisphosphate carboxylase/oxygenase activase 1 transcript variant X1 [Rhododendron hainanense]
VaccDscaff21-augustus-gene-257.33	Function unknown	K16280|1.5e-40|csat:104750588|K16280 E3 ubiquitin-protein ligase RGLG [EC:2.3.2.27] | (RefSeq) E3 ubiquitin-protein ligase RGLG2-like isoform X1	--	GDSL-like Lipase/Acylhydrolase	GDSL esterase/lipase At5g03610 OS=Arabidopsis thaliana OX=3702 GN=At5g03610 PE=2 SV=1	Function unknown	GDSL esterase/lipase At5g03610-like isoform X1 [Camellia sinensis]		VaccDscaff2-augustus-gene-347.23	--	--	--	Cupin	Nectarin-1 OS=Nicotiana plumbaginifolia OX=4092 GN=NEC1 PE=1 SV=1	Posttranslational modification, protein turnover, chaperones	hypothetical protein C3L33_21356, partial [Rhododendron williamsianum]		VaccDscaff13-augustus-gene-12.20	--	--	--	Protein of unknown function (DUF632)	Protein ALTERED PHOSPHATE STARVATION RESPONSE 1 OS=Arabidopsis thaliana OX=3702 GN=APSR1 PE=2 SV=1	Function unknown	hypothetical protein C3L33_01904, partial [Rhododendron williamsianum]
VaccDscaff28-augustus-gene-281.25	--	K13080|3.6e-17|cit:102623228|K13080 flavanone 7-O-glucoside 2''-O-beta-L-rhamnosyltransferase [EC:2.4.1.236] | (RefSeq) flavanone 7-O-glucoside 2''-O-beta-L-rhamnosyltransferase-like	Flavonoid biosynthesis (ko00941);; Flavone and flavonol biosynthesis (ko00944)	--	UDP-glucosyltransferase 29 OS=Panax ginseng OX=4054 GN=UGT29 PE=1 SV=1	--	Beta-D-glucosyl crocetin beta-1,6-glucosyltransferase [Actinidia chinensis var. chinensis]		VaccDscaff6-augustus-gene-391.31	Cell wall/membrane/envelope biogenesis	K03098|7.7e-95|qsu:112019869|K03098 apolipoprotein D and lipocalin family protein | (RefSeq) temperature-induced lipocalin-1	--	Lipocalin-like domain	Temperature-induced lipocalin-1 OS=Arabidopsis thaliana OX=3702 GN=TIL PE=1 SV=1	Cell wall/membrane/envelope biogenesis	temperature-induced lipocalin-1-like [Camellia sinensis]		VaccDscaff41-augustus-gene-40.31	--	K14505|1.5e-115|hbr:110663679|K14505 cyclin D3, plant | (RefSeq) cyclin-D3-1-like	Plant hormone signal transduction (ko04075)	Cyclin, N-terminal domain	Cyclin-D3-3 OS=Arabidopsis thaliana OX=3702 GN=CYCD3-3 PE=2 SV=1	Cell cycle control, cell division, chromosome partitioning	cyclin D3 [Vaccinium corymbosum]
VaccDscaff81-processed-gene-3.11	--	--	--	--	--	--	hypothetical protein C3L33_03746, partial [Rhododendron williamsianum]		VaccDscaff22-snap-gene-288.34	Posttranslational modification, protein turnover, chaperones	K13493|7.3e-100|bna:106432180|K13493 cytokinin-N-glucosyltransferase [EC:2.4.1.-] | (RefSeq) UDP-glycosyltransferase 76C2	Zeatin biosynthesis (ko00908)	Hsp20/alpha crystallin family	UDP-glucose iridoid glucosyltransferase OS=Catharanthus roseus OX=4058 GN=UGT76A2 PE=1 SV=1	--	hypothetical protein C3L33_04521, partial [Rhododendron williamsianum]		VaccDscaff2-snap-gene-375.47	--	--	--	--	Protein LNK1 OS=Arabidopsis thaliana OX=3702 GN=LNK1 PE=1 SV=1	Function unknown	hypothetical protein C3L33_21150, partial [Rhododendron williamsianum]
VaccDscaff23-processed-gene-274.12	--	--	--	--	--	--	hypothetical protein POPTR_017G045300 [Populus trichocarpa]		VaccDscaff37-snap-gene-262.36	General function prediction only	K15078|1.5e-133|tcc:18614561|K15078 structure-specific endonuclease subunit SLX1 [EC:3.6.1.-] | (RefSeq) putative disease resistance protein RGA3	--	NB-ARC domain	Putative disease resistance protein RGA3 OS=Solanum bulbocastanum OX=147425 GN=RGA3 PE=2 SV=2	Signal transduction mechanisms	putative disease resistance protein RGA3 [Camellia sinensis]		VaccDscaff25-processed-gene-309.6	--	--	--	Extensin-like region	--	--	--
VaccDscaff21-snap-gene-155.29	Translation, ribosomal structure and biogenesis	K11294|1.5e-102|zju:107413500|K11294 nucleolin | (RefSeq) protein gar2	--	RNA recognition motif. (a.k.a. RRM, RBD, or RNP domain)	U11/U12 small nuclear ribonucleoprotein 31 kDa protein OS=Arabidopsis thaliana OX=3702 GN=SNRNP31 PE=2 SV=1	RNA processing and modification	hypothetical protein HYC85_000669 [Camellia sinensis]		VaccDscaff27-augustus-gene-332.26	--	K09286|3.7e-112|sind:105157874|K09286 EREBP-like factor | (RefSeq) ethylene-responsive transcription factor RAP2-12-like isoform X1	--	AP2 domain	Ethylene-responsive transcription factor RAP2-2 OS=Arabidopsis thaliana OX=3702 GN=RAP2-2 PE=1 SV=2	Transcription	hypothetical protein C3L33_00084, partial [Rhododendron williamsianum]		VaccDscaff40-processed-gene-27.1	Posttranslational modification, protein turnover, chaperones	K15333|4.4e-80|nsy:104224633|K15333 tRNA guanosine-2'-O-methyltransferase [EC:2.1.1.34] | (RefSeq) uncharacterized protein LOC104224633	--	Subtilase family	Subtilisin-like protease SBT3 OS=Solanum lycopersicum OX=4081 GN=sbt3 PE=1 SV=1	Posttranslational modification, protein turnover, chaperones	hypothetical protein C3L33_10928, partial [Rhododendron williamsianum]
VaccDscaff13-augustus-gene-87.19	--	--	--	COBRA-like protein	Protein COBRA OS=Arabidopsis thaliana OX=3702 GN=COB PE=2 SV=1	Function unknown	hypothetical protein HYC85_005715 [Camellia sinensis]		VaccDscaff13-augustus-gene-86.17	--	K13172|5.7e-10|ppp:112276783|K13172 serine/arginine repetitive matrix protein 2 | (RefSeq) uncharacterized protein LOC112276783 isoform X1	--	Domain of unknown function (DUF4378)	Protein LONGIFOLIA 1 OS=Arabidopsis thaliana OX=3702 GN=LNG1 PE=1 SV=1	Function unknown	Protein LONGIFOLIA like [Actinidia chinensis var. chinensis]		VaccDscaff5-processed-gene-388.6	--	--	--	--	--	Function unknown	PREDICTED: uncharacterized protein LOC100246308 [Vitis vinifera]
VaccDscaff22-processed-gene-128.6	--	K09286|7.8e-29|cit:102614162|K09286 EREBP-like factor | (RefSeq) dehydration-responsive element-binding protein 1B-like	--	AP2 domain	Ethylene-responsive transcription factor ERF026 OS=Arabidopsis thaliana OX=3702 GN=ERF026 PE=2 SV=1	Transcription	hypothetical protein C3L33_08588, partial [Rhododendron williamsianum]		VaccDscaff37-snap-gene-227.34	--	--	--	VQ motif	VQ motif-containing protein 22 OS=Arabidopsis thaliana OX=3702 GN=VQ22 PE=2 SV=1	Function unknown	hypothetical protein C3L33_18124, partial [Rhododendron williamsianum]		VaccDscaff186-augustus-gene-0.29	--	K20628|4.8e-76|adu:107468114|K20628 expansin | (RefSeq) expansin-A10	--	Expansin C-terminal domain	Expansin-A20 OS=Arabidopsis thaliana OX=3702 GN=EXPA20 PE=2 SV=1	Carbohydrate transport and metabolism	hypothetical protein C3L33_09319, partial [Rhododendron williamsianum]
VaccDscaff13-augustus-gene-71.35	--	--	--	Hypoxia induced protein conserved region	RING-H2 finger protein ATL48 OS=Arabidopsis thaliana OX=3702 GN=ATL48 PE=1 SV=2	Function unknown	putative inactive receptor kinase [Dorcoceras hygrometricum]		VaccDscaff26-snap-gene-7.26	Energy production and conversion	K00279|7.7e-217|nta:107793379|K00279 cytokinin dehydrogenase [EC:1.5.99.12] | (RefSeq) cytokinin dehydrogenase 3-like	Zeatin biosynthesis (ko00908)	Cytokinin dehydrogenase 1, FAD and cytokinin binding	Cytokinin dehydrogenase 3 OS=Arabidopsis thaliana OX=3702 GN=CKX3 PE=1 SV=1	Energy production and conversion	hypothetical protein F0562_009677 [Nyssa sinensis]		VaccDscaff8-snap-gene-48.35	Translation, ribosomal structure and biogenesis	K02357|2.2e-19|atr:18426703|K02357 elongation factor Ts | (RefSeq) uncharacterized protein LOC18426703	--	Elongation factor TS	Elongation factor Ts, mitochondrial OS=Arabidopsis thaliana OX=3702 GN=EFTS PE=1 SV=1	Translation, ribosomal structure and biogenesis	hypothetical protein C3L33_11777, partial [Rhododendron williamsianum]
VaccDscaff24-processed-gene-165.4	--	--	--	VQ motif	VQ motif-containing protein 22 OS=Arabidopsis thaliana OX=3702 GN=VQ22 PE=2 SV=1	Function unknown	VQ motif-containing protein [Actinidia chinensis var. chinensis]		VaccDscaff7-augustus-gene-3.44	--	K03094|2.4e-60|cann:107840580|K03094 S-phase kinase-associated protein 1 | (RefSeq) Skp1; SKP1-like protein 1B	Ubiquitin mediated proteolysis (ko04120);; Protein processing in endoplasmic reticulum (ko04141)	Skp1 family, tetramerisation domain	SKP1-like protein 1B OS=Arabidopsis thaliana OX=3702 GN=SKP1B PE=1 SV=1	Posttranslational modification, protein turnover, chaperones	hypothetical protein C3L33_09153, partial [Rhododendron williamsianum]		VaccDscaff19-processed-gene-125.2	--	K22683|1.3e-197|nta:107767952|K22683 aspartyl protease family protein [EC:3.4.23.-] | (RefSeq) protein ASPARTIC PROTEASE IN GUARD CELL 1-like	--	Xylanase inhibitor N-terminal	Protein ASPARTIC PROTEASE IN GUARD CELL 1 OS=Arabidopsis thaliana OX=3702 GN=ASPG1 PE=1 SV=1	Posttranslational modification, protein turnover, chaperones	Protein ASPARTIC PROTEASE IN GUARD CELL 1 like [Actinidia chinensis var. chinensis]
VaccDscaff22-snap-gene-19.33	Carbohydrate transport and metabolism	K08193|7.4e-93|vvi:100255061|K08193 MFS transporter, ACS family, solute carrier family 17 (sodium-dependent inorganic phosphate cotransporter), other | (RefSeq) ascorbate transporter, chloroplastic	--	Major Facilitator Superfamily	Ascorbate transporter, chloroplastic OS=Arabidopsis thaliana OX=3702 GN=PHT4;4 PE=1 SV=1	Carbohydrate transport and metabolism	hypothetical protein C3L33_07958, partial [Rhododendron williamsianum]		VaccDscaff12-snap-gene-44.37	Function unknown	K13412|4.0e-211|mus:103995457|K13412 calcium-dependent protein kinase [EC:2.7.11.1] | (RefSeq) calcium-dependent protein kinase 29-like	Plant-pathogen interaction (ko04626)	Protein kinase domain	Calcium-dependent protein kinase 29 OS=Arabidopsis thaliana OX=3702 GN=CPK29 PE=2 SV=2	Signal transduction mechanisms	hypothetical protein C3L33_11199, partial [Rhododendron williamsianum]		VaccDscaff9-augustus-gene-399.21	--	K13248|7.4e-126|jcu:105631487|K13248 pyridoxal phosphate phosphatase PHOSPHO2 [EC:3.1.3.74] | (RefSeq) inorganic pyrophosphatase 1-like	Vitamin B6 metabolism (ko00750)	Putative Phosphatase	Inorganic pyrophosphatase 2 OS=Arabidopsis thaliana OX=3702 GN=At1g17710 PE=2 SV=1	Function unknown	Inorganic pyrophosphatase [Actinidia chinensis var. chinensis]
VaccDscaff35-snap-gene-105.29	--	K11000|0.0e+00|sind:105175539|K11000 callose synthase [EC:2.4.1.-] | (RefSeq) callose synthase 11	--	1,3-beta-glucan synthase component	Callose synthase 11 OS=Arabidopsis thaliana OX=3702 GN=CALS11 PE=2 SV=1	Cell wall/membrane/envelope biogenesis	hypothetical protein C3L33_15520, partial [Rhododendron williamsianum]		VaccDscaff28-augustus-gene-186.17	Carbohydrate transport and metabolism	K01179|1.2e-246|jcu:105634097|K01179 endoglucanase [EC:3.2.1.4] | (RefSeq) endoglucanase 8	Starch and sucrose metabolism (ko00500)	Glycosyl hydrolase family 9	Endoglucanase 8 OS=Arabidopsis thaliana OX=3702 GN=CEL1 PE=2 SV=1	Carbohydrate transport and metabolism	endoglucanase 8-like isoform X2 [Camellia sinensis]		VaccDscaff17-augustus-gene-248.23	Energy production and conversion;; Posttranslational modification, protein turnover, chaperones	K07399|1.2e-228|jre:109003309|K07399 cytochrome c biogenesis protein | (RefSeq) cytochrome c biogenesis protein CCS1, chloroplastic	--	ResB-like family	Cytochrome c biogenesis protein CCS1, chloroplastic OS=Arabidopsis thaliana OX=3702 GN=CCS1 PE=1 SV=1	Posttranslational modification, protein turnover, chaperones	Cytochrome c biogenesis protein [Actinidia chinensis var. chinensis]
VaccDscaff3-snap-gene-391.42		K13416|4.7e-79|mdm:103416333|K13416 brassinosteroid insensitive 1-associated receptor kinase 1 [EC:2.7.10.1 2.7.11.1] | (RefSeq) BRASSINOSTEROID INSENSITIVE 1-associated receptor kinase 1-like isoform X1	MAPK signaling pathway - plant (ko04016);; Plant hormone signal transduction (ko04075);; Plant-pathogen interaction (ko04626)	Protein kinase domain	Rust resistance kinase Lr10 OS=Triticum aestivum OX=4565 GN=LRK10 PE=2 SV=1	Inorganic ion transport and metabolism	Cd2+/Zn2+-exporting ATPase [Vigna unguiculata]		VaccDscaff1402-augustus-gene-0.6	--	--	--	--	Protein JASON OS=Arabidopsis thaliana OX=3702 GN=JASON PE=2 SV=1	--	hypothetical protein C3L33_07363, partial [Rhododendron williamsianum]		VaccDscaff44-processed-gene-111.1	--	K09286|1.1e-57|tcc:18587975|K09286 EREBP-like factor | (RefSeq) dehydration-responsive element-binding protein 3	--	AP2 domain	Dehydration-responsive element-binding protein 3 OS=Arabidopsis thaliana OX=3702 GN=DREB3 PE=2 SV=1	Transcription	hypothetical protein C3L33_15787, partial [Rhododendron williamsianum]
VaccDscaff16-augustus-gene-328.28	Amino acid transport and metabolism	K01626|3.1e-258|mesc:110609708|K01626 3-deoxy-7-phosphoheptulonate synthase [EC:2.5.1.54] | (RefSeq) phospho-2-dehydro-3-deoxyheptonate aldolase 1, chloroplastic-like	Phenylalanine, tyrosine and tryptophan biosynthesis (ko00400);; Biosynthesis of amino acids (ko01230)	Class-II DAHP synthetase family	Phospho-2-dehydro-3-deoxyheptonate aldolase 1, chloroplastic OS=Solanum tuberosum OX=4113 GN=SHKA PE=1 SV=2	Amino acid transport and metabolism	phospho-2-dehydro-3-deoxyheptonate aldolase 1, chloroplastic-like [Camellia sinensis]		VaccDscaff44-snap-gene-28.36	--	K20772|1.7e-08|nau:109241083|K20772 1-aminocyclopropane-1-carboxylate synthase 1/2/6 [EC:4.4.1.14] | (RefSeq) 1-aminocyclopropane-1-carboxylate synthase-like	Cysteine and methionine metabolism (ko00270);; MAPK signaling pathway - plant (ko04016)	--	1-aminocyclopropane-1-carboxylate synthase OS=Dianthus caryophyllus OX=3570 GN=ACS2 PE=2 SV=1	Signal transduction mechanisms	hypothetical protein TEA_024358 [Camellia sinensis var. sinensis]		VaccDscaff32-augustus-gene-296.18	Energy production and conversion;; General function prediction only	K18980|2.9e-134|cmo:103489010|K18980 2-methylene-furan-3-one reductase [EC:1.3.1.105] | (RefSeq) 2-methylene-furan-3-one reductase	--	Zinc-binding dehydrogenase	2-methylene-furan-3-one reductase OS=Solanum lycopersicum OX=4081 GN=EO PE=1 SV=1	Energy production and conversion	hypothetical protein C3L33_01596, partial [Rhododendron williamsianum]
VaccDscaff11-augustus-gene-119.38	--	K12835|1.6e-36|cmax:111493042|K12835 ATP-dependent RNA helicase DDX42 [EC:3.6.4.13] | (RefSeq) DEAD-box ATP-dependent RNA helicase 24 isoform X1	Spliceosome (ko03040)	WRKY DNA -binding domain	WRKY transcription factor 28 OS=Arabidopsis thaliana OX=3702 GN=WRKY28 PE=2 SV=1	Transcription	WRKY transcription factor 28 [Actinidia chinensis var. chinensis]		VaccDscaff4-snap-gene-124.33	Carbohydrate transport and metabolism	K13692|9.7e-116|bna:106360634|K13692 UDP-glucose:(indol-3-yl)acetate beta-D-glucosyltransferase [EC:2.4.1.121] | (RefSeq) UDP-glycosyltransferase 75D1-like	--	UDP-glucoronosyl and UDP-glucosyl transferase	Crocetin glucosyltransferase, chloroplastic OS=Gardenia jasminoides OX=114476 GN=UGT75L6 PE=1 SV=1	--	Crocetin glucosyltransferase [Actinidia chinensis var. chinensis]		VaccDscaff36-augustus-gene-227.24	--	K13065|1.6e-29|ghi:107914559|K13065 shikimate O-hydroxycinnamoyltransferase [EC:2.3.1.133] | (RefSeq) shikimate O-hydroxycinnamoyltransferase-like	Phenylpropanoid biosynthesis (ko00940);; Flavonoid biosynthesis (ko00941);; Stilbenoid, diarylheptanoid and gingerol biosynthesis (ko00945)	Transferase family	Protein ECERIFERUM 26 OS=Arabidopsis thaliana OX=3702 GN=CER26 PE=2 SV=1	Function unknown	hypothetical protein C3L33_15198, partial [Rhododendron williamsianum]
VaccDscaff40-processed-gene-62.16	--	--	--	--	--	--	hypothetical protein POPTR_017G045300 [Populus trichocarpa]		VaccDscaff12-processed-gene-44.1	Coenzyme transport and metabolism	K08242|4.1e-185|gmx:100791154|K08242 24-methylenesterol C-methyltransferase [EC:2.1.1.143] | (RefSeq) SMT2-2; 24-methylenesterol C-methyltransferase 2-2	Steroid biosynthesis (ko00100)	Sterol methyltransferase C-terminal	24-methylenesterol C-methyltransferase 2 OS=Arabidopsis thaliana OX=3702 GN=SMT2 PE=1 SV=2	Lipid transport and metabolism	hypothetical protein C3L33_11202, partial [Rhododendron williamsianum]		VaccDscaff1486-snap-gene-0.3	--	K09422|1.8e-65|vvi:100243253|K09422 transcription factor MYB, plant | (RefSeq) MYBA6; R2R3 MYB transcription factor	--	Myb-like DNA-binding domain	Transcription factor MYB1 OS=Actinidia chinensis var. chinensis OX=1590841 GN=MYB1 PE=2 SV=1	Transcription	transcription factor MYB1, partial [Vaccinium corymbosum]
VaccDscaff39-processed-gene-233.3	Posttranslational modification, protein turnover, chaperones	K03798|1.2e-238|tcc:18609064|K03798 cell division protease FtsH [EC:3.4.24.-] | (RefSeq) ATP-dependent zinc metalloprotease FTSH 2, chloroplastic	--	ATPase family associated with various cellular activities (AAA)	ATP-dependent zinc metalloprotease FTSH 2, chloroplastic OS=Oryza sativa subsp. japonica OX=39947 GN=FTSH2 PE=3 SV=1	Posttranslational modification, protein turnover, chaperones	hypothetical protein C3L33_10564, partial [Rhododendron williamsianum]		VaccDscaff24-snap-gene-144.40	Energy production and conversion	K22395|3.9e-172|gra:105793940|K22395 cinnamyl-alcohol dehydrogenase [EC:1.1.1.195] | (RefSeq) tetrahydrocannabinolic acid synthase-like	Phenylpropanoid biosynthesis (ko00940)	FAD binding domain	Berberine bridge enzyme-like 15 OS=Arabidopsis thaliana OX=3702 GN=MEE23 PE=1 SV=1	Energy production and conversion	hypothetical protein CUMW_008660 [Citrus unshiu]		VaccDscaff28-augustus-gene-267.21	--	--	--	--	--	Function unknown	Alpha-internexin like [Actinidia chinensis var. chinensis]
VaccDscaff16-processed-gene-53.3	--	K13453|1.5e-116|spen:107020282|K13453 disease resistance protein | (RefSeq) putative late blight resistance protein homolog R1A-4	Plant-pathogen interaction (ko04626)	NB-ARC domain	Putative late blight resistance protein homolog R1A-10 OS=Solanum demissum OX=50514 GN=R1A-10 PE=3 SV=1	Signal transduction mechanisms	hypothetical protein F0562_034368 [Nyssa sinensis]		VaccDscaff17-augustus-gene-278.19	--	K13343|1.2e-47|cann:107875908|K13343 peroxin-14 | (RefSeq) peroxisomal membrane protein PEX14-like	Peroxisome (ko04146)	Pex14 N-terminal domain	Peroxisomal membrane protein PEX14 OS=Arabidopsis thaliana OX=3702 GN=PEX14 PE=1 SV=2	--	hypothetical protein F0562_024785 [Nyssa sinensis]		VaccDscaff99-augustus-gene-4.63	--	--	--	--	Protein SMAX1-LIKE 4 OS=Arabidopsis thaliana OX=3702 GN=SMXL4 PE=1 SV=1	Posttranslational modification, protein turnover, chaperones	hypothetical protein C3L33_03864, partial [Rhododendron williamsianum]
VaccDscaff22-augustus-gene-53.40	--	--	--	Plastocyanin-like domain	Uclacyanin 1 OS=Arabidopsis thaliana OX=3702 GN=UCC1 PE=1 SV=1	Function unknown	hypothetical protein C3L33_08129, partial [Rhododendron williamsianum]		VaccDscaff6-augustus-gene-391.30	Cell wall/membrane/envelope biogenesis	K03098|7.7e-95|qsu:112019869|K03098 apolipoprotein D and lipocalin family protein | (RefSeq) temperature-induced lipocalin-1	--	Lipocalin-like domain	Temperature-induced lipocalin-1 OS=Arabidopsis thaliana OX=3702 GN=TIL PE=1 SV=1	Cell wall/membrane/envelope biogenesis	temperature-induced lipocalin-1-like [Camellia sinensis]		VaccDscaff98-processed-gene-0.10	Cell wall/membrane/envelope biogenesis;; Cell cycle control, cell division, chromosome partitioning;; Signal transduction mechanisms	K08900|4.7e-105|nta:107786408|K08900 mitochondrial chaperone BCS1 | (RefSeq) AAA-ATPase At4g25835-like	--	Domain associated at C-terminal with AAA	AAA-ATPase At5g57480 OS=Arabidopsis thaliana OX=3702 GN=At5g57480 PE=3 SV=1	Posttranslational modification, protein turnover, chaperones	AAA-ATPase [Actinidia chinensis var. chinensis]
VaccDscaff4-augustus-gene-289.31	--	K00737|3.1e-202|sind:105156648|K00737 beta-1,4-mannosyl-glycoprotein beta-1,4-N-acetylglucosaminyltransferase [EC:2.4.1.144] | (RefSeq) uncharacterized protein LOC105156648	N-Glycan biosynthesis (ko00510)	Glycosyltransferase family 17	--	Function unknown	uncharacterized protein LOC114258155 [Camellia sinensis]		VaccDscaff43-augustus-gene-36.34	Secondary metabolites biosynthesis, transport and catabolism	K24028|3.0e-97|tcc:18613162|K24028 salicylic acid 3-hydroxylase [EC:1.14.11.-] | (RefSeq) hyoscyamine 6-dioxygenase	--	non-haem dioxygenase in morphine synthesis N-terminal	Hyoscyamine 6-dioxygenase OS=Hyoscyamus niger OX=4079 GN=H6H PE=1 SV=1	Secondary metabolites biosynthesis, transport and catabolism	hypothetical protein C3L33_04228, partial [Rhododendron williamsianum]		VaccDscaff11-processed-gene-118.0	--	K08912|7.8e-138|hbr:110661838|K08912 light-harvesting complex II chlorophyll a/b binding protein 1 | (RefSeq) chlorophyll a-b binding protein of LHCII type 1	Photosynthesis - antenna proteins (ko00196)	Chlorophyll A-B binding protein	Chlorophyll a-b binding protein 21, chloroplastic OS=Nicotiana tabacum OX=4097 GN=CAB21 PE=2 SV=1	Translation, ribosomal structure and biogenesis	hypothetical protein CDL12_03673 [Handroanthus impetiginosus]
VaccDscaff45-processed-gene-146.0	--	--	--	Rapid ALkalinization Factor (RALF)	Protein RALF-like 33 OS=Arabidopsis thaliana OX=3702 GN=RALFL33 PE=2 SV=1	Function unknown	hypothetical protein TEA_019952 [Camellia sinensis var. sinensis]		VaccDscaff43-processed-gene-17.1	--	--	--	--	--	--	phosphopantothenoylcysteine decarboxylase subunit VHS3-like [Camellia sinensis]		VaccDscaff22-snap-gene-99.34	--	--	--	--	Protein LNK2 OS=Arabidopsis thaliana OX=3702 GN=LNK2 PE=1 SV=1	Function unknown	hypothetical protein C3L33_08374, partial [Rhododendron williamsianum]
VaccDscaff12-snap-gene-296.36	--	K13425|6.2e-74|vvi:100256849|K13425 WRKY transcription factor 22 | (RefSeq) WRKY transcription factor 22	MAPK signaling pathway - plant (ko04016);; Plant-pathogen interaction (ko04626)	WRKY DNA -binding domain	WRKY transcription factor 22 OS=Arabidopsis thaliana OX=3702 GN=WRKY22 PE=2 SV=1	Transcription	hypothetical protein C3L33_07927, partial [Rhododendron williamsianum]		VaccDscaff28-augustus-gene-258.32	--	--	--	Wall-associated receptor kinase galacturonan-binding	--	Function unknown	Wall-associated receptor kinase-like [Actinidia chinensis var. chinensis]		VaccDscaff19-processed-gene-215.6	--	--	--	Leucine Rich repeats (2 copies)	Receptor-like protein 51 OS=Arabidopsis thaliana OX=3702 GN=RLP51 PE=1 SV=1	Function unknown	hypothetical protein HYC85_017997 [Camellia sinensis]
VaccDscaff41-snap-gene-214.36	--	--	--	Arabinogalactan peptide	Arabinogalactan protein 16 OS=Arabidopsis thaliana OX=3702 GN=AGP16 PE=1 SV=1	Function unknown	hypothetical protein L484_020814 [Morus notabilis]		VaccDscaff2-augustus-gene-19.35	Coenzyme transport and metabolism	K01772|3.3e-65|sot:102605997|K01772 protoporphyrin/coproporphyrin ferrochelatase [EC:4.99.1.1 4.99.1.9] | (RefSeq) ferrochelatase-2, chloroplastic-like	Porphyrin and chlorophyll metabolism (ko00860)	Ferrochelatase	Ferrochelatase-2, chloroplastic OS=Cucumis sativus OX=3659 GN=HEMH PE=2 SV=1	Coenzyme transport and metabolism	hypothetical protein TEA_018166 [Camellia sinensis var. sinensis]		VaccDscaff28-augustus-gene-316.30	--	K17506|5.2e-122|oeu:111403034|K17506 protein phosphatase 1L [EC:3.1.3.16] | (RefSeq) probable protein phosphatase 2C 25	--	Protein phosphatase 2C	Probable protein phosphatase 2C 25 OS=Arabidopsis thaliana OX=3702 GN=At2g30020 PE=1 SV=1	Signal transduction mechanisms	Protein like [Actinidia chinensis var. chinensis]
VaccDscaff5-augustus-gene-17.16	Carbohydrate transport and metabolism	K15920|1.5e-105|hbr:110662087|K15920 xylan 1,4-beta-xylosidase [EC:3.2.1.37] | (RefSeq) beta-xylosidase/alpha-L-arabinofuranosidase 2-like	Amino sugar and nucleotide sugar metabolism (ko00520)	Glycosyl hydrolase family 3 N terminal domain	Beta-D-xylosidase 1 OS=Arabidopsis thaliana OX=3702 GN=BXL1 PE=1 SV=1	Carbohydrate transport and metabolism	PREDICTED: putative beta-D-xylosidase [Nelumbo nucifera]		VaccDscaff31-processed-gene-66.10	--	K20888|2.8e-85|nnu:104612982|K20888 xyloglucan galactosyltransferase MUR3 [EC:2.4.1.-] | (RefSeq) xyloglucan galactosyltransferase MUR3-like	--	Exostosin family	Xyloglucan galactosyltransferase XLT2 OS=Arabidopsis thaliana OX=3702 GN=XLT2 PE=1 SV=1	--	hypothetical protein C3L33_22734, partial [Rhododendron williamsianum]		VaccDscaff22-processed-gene-82.4	--	--	--	Leucine rich repeat	DNA damage-repair/toleration protein DRT100 OS=Arabidopsis thaliana OX=3702 GN=DRT100 PE=2 SV=2	Function unknown	DNA-damage-repair/toleration protein [Actinidia chinensis var. chinensis]
VaccDscaff3-processed-gene-198.7	--	--	--	Protein of unknown function (DUF1664)	--	Function unknown	Cytospin-B like [Actinidia chinensis var. chinensis]		VaccDscaff30-snap-gene-213.30	Function unknown	K19001|0.0e+00|hbr:110665023|K19001 ATP-dependent DNA helicase | (RefSeq) ATP-dependent DNA helicase DDM1	--	SNF2 family N-terminal domain	ATP-dependent DNA helicase DDM1 OS=Arabidopsis thaliana OX=3702 GN=DDM1 PE=1 SV=1	Transcription	hypothetical protein C3L33_01131, partial [Rhododendron williamsianum]		VaccDscaff23-augustus-gene-39.26	Signal transduction mechanisms	K00924|0.0e+00|oeu:111388831|K00924 kinase [EC:2.7.1.-] | (RefSeq) receptor protein kinase TMK1-like	--	Protein kinase domain	Receptor protein kinase TMK1 OS=Arabidopsis thaliana OX=3702 GN=TMK1 PE=1 SV=1	Signal transduction mechanisms	Receptor protein kinase [Actinidia chinensis var. chinensis]
VaccDscaff225-augustus-gene-1.30	Carbohydrate transport and metabolism	K09873|2.2e-121|egr:104425948|K09873 aquaporin TIP | (RefSeq) aquaporin TIP1-1	--	Major intrinsic protein	Aquaporin TIP1-1 OS=Arabidopsis thaliana OX=3702 GN=TIP1-1 PE=1 SV=1	Carbohydrate transport and metabolism	Aquaporin TIP1-1 [Morella rubra]		VaccDscaff39-processed-gene-109.21	--	K10882|8.6e-06|nau:109212791|K10882 crossover junction endonuclease EME1 [EC:3.1.22.-] | (RefSeq) crossover junction endonuclease EME1B	Homologous recombination (ko03440)	--	--	Function unknown	hypothetical protein C3L33_18265, partial [Rhododendron williamsianum]		VaccDscaff27-snap-gene-236.35	--	K22763|3.8e-98|egu:105032347|K22763 deubiquitinase DESI2 [EC:3.4.19.12] | (RefSeq) deSI-like protein At4g17486 isoform X2	--	PPPDE putative peptidase domain	DeSI-like protein At4g17486 OS=Arabidopsis thaliana OX=3702 GN=At4g17486 PE=2 SV=1	Function unknown	hypothetical protein C3L33_19541, partial [Rhododendron williamsianum]
VaccDscaff44-processed-gene-174.6	General function prediction only	K13453|1.0e-136|sly:101263413|K13453 disease resistance protein | (RefSeq) putative late blight resistance protein homolog R1A-4	Plant-pathogen interaction (ko04626)	NB-ARC domain	Putative late blight resistance protein homolog R1B-12 OS=Solanum demissum OX=50514 GN=R1B-12 PE=3 SV=2	Signal transduction mechanisms	Late blight resistance protein like [Actinidia chinensis var. chinensis]		VaccDscaff13-snap-gene-106.34	--	K09264|1.7e-43|vvi:104878193|K09264 MADS-box transcription factor, plant | (RefSeq) MADS-box transcription factor 23	--	SRF-type transcription factor (DNA-binding and dimerisation domain)	MADS-box transcription factor 57 OS=Oryza sativa subsp. japonica OX=39947 GN=MADS57 PE=1 SV=2	Transcription	MADS-box transcription factor [Actinidia chinensis var. chinensis]		VaccDscaff198-snap-gene-0.47	--	--	--	--	Photosynthetic NDH subunit of subcomplex B 2, chloroplastic OS=Arabidopsis thaliana OX=3702 GN=PNSB2 PE=2 SV=1	Function unknown	hypothetical protein C3L33_02147, partial [Rhododendron williamsianum]
VaccDscaff41-processed-gene-59.2	Secondary metabolites biosynthesis, transport and catabolism;; Defense mechanisms	K23136|1.1e-178|gra:105769156|K23136 fraxetin 5-hydroxylase [EC:1.14.14.164] | (RefSeq) uncharacterized LOC105769156	--	Cytochrome P450	Cytochrome P450 82A3 OS=Glycine max OX=3847 GN=CYP82A3 PE=2 SV=1	Secondary metabolites biosynthesis, transport and catabolism	LOW QUALITY PROTEIN: cytochrome P450 CYP82D47-like [Camellia sinensis]		VaccDscaff2-processed-gene-231.0	--	--	--	Hydrophobic seed protein	36.4 kDa proline-rich protein OS=Solanum lycopersicum OX=4081 GN=TPRP-F1 PE=2 SV=1	Function unknown	hypothetical protein FH972_025837 [Carpinus fangiana]		VaccDscaff9-augustus-gene-404.28	Transcription	K01180|3.0e-81|cmax:111487562|K01180 endo-1,3(4)-beta-glucanase [EC:3.2.1.6] | (RefSeq) uncharacterized protein LOC111487562	--	Protein tyrosine and serine/threonine kinase	Inactive protein kinase SELMODRAFT_444075 OS=Selaginella moellendorffii OX=88036 GN=SELMODRAFT_444075 PE=2 SV=1	Signal transduction mechanisms	hypothetical protein C3L33_14685, partial [Rhododendron williamsianum]
VaccDscaff23-snap-gene-50.29	Cell wall/membrane/envelope biogenesis	K22133|4.0e-25|egr:104443803|K22133 oxalate---CoA ligase [EC:6.2.1.8] | (RefSeq) oxalate--CoA ligase isoform X2	Glyoxylate and dicarboxylate metabolism (ko00630)	Legume lectin domain	L-type lectin-domain containing receptor kinase VIII.2 OS=Arabidopsis thaliana OX=3702 GN=LECRK82 PE=2 SV=1	Signal transduction mechanisms	hypothetical protein D5086_0000061070 [Populus alba]		VaccDscaff34-augustus-gene-283.18	--	K00430|3.1e-136|egr:104430480|K00430 peroxidase [EC:1.11.1.7] | (RefSeq) cationic peroxidase 1-like	Phenylpropanoid biosynthesis (ko00940)	Peroxidase	Cationic peroxidase 1 OS=Arachis hypogaea OX=3818 GN=PNC1 PE=1 SV=2	Secondary metabolites biosynthesis, transport and catabolism	Cationic peroxidase [Actinidia chinensis var. chinensis]		VaccDscaff5-processed-gene-53.4	--	--	--	Heavy-metal-associated domain	Heavy metal-associated isoprenylated plant protein 32 OS=Arabidopsis thaliana OX=3702 GN=HIPP32 PE=2 SV=1	Function unknown	Heavy metal-associated isoprenylated plant protein [Actinidia chinensis var. chinensis]
VaccDscaff23-processed-gene-205.5	--	K02257|1.4e-17|jre:109005753|K02257 heme o synthase [EC:2.5.1.141] | (RefSeq) protoheme IX farnesyltransferase, mitochondrial-like	Oxidative phosphorylation (ko00190);; Porphyrin and chlorophyll metabolism (ko00860)	--	Protoheme IX farnesyltransferase, mitochondrial OS=Arabidopsis thaliana OX=3702 GN=COX10 PE=2 SV=4	Coenzyme transport and metabolism	hypothetical protein C3L33_05082, partial [Rhododendron williamsianum]		VaccDscaff7-snap-gene-366.44	--	K03188|1.5e-35|dcr:108224146|K03188 urease accessory protein | (RefSeq) uncharacterized protein LOC108224146 isoform X1	--	Phloem protein 2	F-box protein PP2-B11 OS=Arabidopsis thaliana OX=3702 GN=PP2B11 PE=1 SV=1	Function unknown	hypothetical protein C3L33_20113, partial [Rhododendron williamsianum]		VaccDscaff6-snap-gene-241.17	General function prediction only	--	--	Protein of unknown function (DUF1295)	--	Function unknown	hypothetical protein C3L33_04914, partial [Rhododendron williamsianum]
VaccDscaff14-augustus-gene-394.33	--	K20628|4.8e-76|adu:107468114|K20628 expansin | (RefSeq) expansin-A10	--	Expansin C-terminal domain	Expansin-A20 OS=Arabidopsis thaliana OX=3702 GN=EXPA20 PE=2 SV=1	Function unknown	hypothetical protein C3L33_09319, partial [Rhododendron williamsianum]		VaccDscaff36-augustus-gene-73.33	Nucleotide transport and metabolism	K14611|2.3e-269|nsy:104231657|K14611 solute carrier family 23 (nucleobase transporter), member 1 | (RefSeq) nucleobase-ascorbate transporter 6	--	Permease family	Nucleobase-ascorbate transporter 6 OS=Arabidopsis thaliana OX=3702 GN=NAT6 PE=2 SV=2	Nucleotide transport and metabolism	nucleobase-ascorbate transporter 6 [Camellia sinensis]		VaccDscaff24-snap-gene-223.24	Inorganic ion transport and metabolism	K01082|9.0e-134|vvi:100250311|K01082 3'(2'), 5'-bisphosphate nucleotidase [EC:3.1.3.7] | (RefSeq) PAP-specific phosphatase HAL2-like	Sulfur metabolism (ko00920)	Inositol monophosphatase family	PAP-specific phosphatase HAL2-like OS=Arabidopsis thaliana OX=3702 GN=AHL PE=2 SV=1	Inorganic ion transport and metabolism	PAP-specific phosphatase HAL2-like [Camellia sinensis]
VaccDscaff39-processed-gene-102.9	--	K22683|7.2e-67|atr:18442347|K22683 aspartyl protease family protein [EC:3.4.23.-] | (RefSeq) aspartyl protease family protein 2	--	Xylanase inhibitor N-terminal	Aspartic proteinase nepenthesin-1 OS=Nepenthes gracilis OX=150966 GN=nep1 PE=1 SV=1	Posttranslational modification, protein turnover, chaperones	hypothetical protein C3L33_18373, partial [Rhododendron williamsianum]		VaccDscaff224-augustus-gene-0.24	--	--	--	--	Uncharacterized membrane protein At1g16860 OS=Arabidopsis thaliana OX=3702 GN=At1g16860 PE=1 SV=1	Function unknown	hypothetical protein CEY00_Acc12892 [Actinidia chinensis var. chinensis]		VaccDscaff17-augustus-gene-84.25	Signal transduction mechanisms	--	--	alpha/beta hydrolase fold	--	Function unknown	hypothetical protein C3L33_20193, partial [Rhododendron williamsianum]
VaccDscaff9-processed-gene-64.0	Secondary metabolites biosynthesis, transport and catabolism	K00660|2.5e-212|jre:108988452|K00660 chalcone synthase [EC:2.3.1.74] | (RefSeq) chalcone synthase 1	Flavonoid biosynthesis (ko00941);; Circadian rhythm - plant (ko04712)	Chalcone and stilbene synthases, N-terminal domain	Chalcone synthase OS=Casuarina glauca OX=3522 GN=CHS1 PE=2 SV=1	Coenzyme transport and metabolism	chalcone synthase [Vaccinium ashei]		VaccDscaff15-augustus-gene-391.60	--	--	--	--	--	Function unknown	hypothetical protein TEA_022559 [Camellia sinensis var. sinensis]		VaccDscaff14-augustus-gene-327.35	--	K13065|2.0e-90|qsu:112004056|K13065 shikimate O-hydroxycinnamoyltransferase [EC:2.3.1.133] | (RefSeq) acetyl-CoA-benzylalcohol acetyltransferase-like	Phenylpropanoid biosynthesis (ko00940);; Flavonoid biosynthesis (ko00941);; Stilbenoid, diarylheptanoid and gingerol biosynthesis (ko00945)	Transferase family	Stemmadenine O-acetyltransferase OS=Catharanthus roseus OX=4058 GN=SAT PE=1 SV=1	--	hypothetical protein C3L33_21128, partial [Rhododendron williamsianum]
VaccDscaff41-processed-gene-220.4	--	K09287|6.8e-124|zju:107429517|K09287 RAV-like factor | (RefSeq) AP2/ERF and B3 domain-containing transcription factor RAV1-like isoform X1	--	B3 DNA binding domain	AP2/ERF and B3 domain-containing transcription repressor RAV2 OS=Arabidopsis thaliana OX=3702 GN=RAV2 PE=1 SV=1	Transcription	hypothetical protein C3L33_13727, partial [Rhododendron williamsianum]		VaccDscaff36-augustus-gene-189.26	--	K17616|4.5e-55|oeu:111404463|K17616 CTD small phosphatase-like protein 2 [EC:3.1.3.-] | (RefSeq) uncharacterized protein LOC111404463	--	Rubber elongation factor protein (REF)	REF/SRPP-like protein At1g67360 OS=Arabidopsis thaliana OX=3702 GN=At1g67360 PE=2 SV=1	Function unknown	hypothetical protein C3L33_13859, partial [Rhododendron williamsianum]		VaccDscaff15-augustus-gene-302.29	Signal transduction mechanisms	K12761|1.3e-172|pmum:103341669|K12761 carbon catabolite-derepressing protein kinase [EC:2.7.11.1] | (RefSeq) CBL-interacting serine/threonine-protein kinase 11	--	Protein kinase domain	CBL-interacting serine/threonine-protein kinase 11 OS=Arabidopsis thaliana OX=3702 GN=CIPK11 PE=1 SV=1	Signal transduction mechanisms	hypothetical protein C3L33_07162, partial [Rhododendron williamsianum]
VaccDscaff4-augustus-gene-19.32	--	--	--	Domain of unknown function (DUF588)	CASP-like protein 1D1 OS=Vitis vinifera OX=29760 GN=VIT_05s0020g01830 PE=2 SV=2	Function unknown	CASP-like protein [Actinidia chinensis var. chinensis]		VaccDscaff32-augustus-gene-328.20	--	K15014|2.8e-36|qsu:112035105|K15014 solute carrier family 29 (equilibrative nucleoside transporter), member 1/2/3 | (RefSeq) equilibrative nucleotide transporter 3-like	--	Ring finger domain	NEP1-interacting protein 1 OS=Arabidopsis thaliana OX=3702 GN=NIP1 PE=1 SV=2	Posttranslational modification, protein turnover, chaperones	hypothetical protein C3L33_01741, partial [Rhododendron williamsianum]		VaccDscaff12-processed-gene-12.12	--	K19892|1.5e-37|cam:101507103|K19892 glucan endo-1,3-beta-glucosidase 4 [EC:3.2.1.39] | (RefSeq) glucan endo-1,3-beta-glucosidase 4	Starch and sucrose metabolism (ko00500)	Glycosyl hydrolases family 17	Glucan endo-1,3-beta-glucosidase 11 OS=Arabidopsis thaliana OX=3702 GN=At1g32860 PE=2 SV=1	Function unknown	Glucan endo-1,3-beta-glucosidase [Actinidia chinensis var. chinensis]
VaccDscaff37-processed-gene-48.7	--	K10666|9.1e-69|nsy:104225404|K10666 E3 ubiquitin-protein ligase RNF5 [EC:2.3.2.27] | (RefSeq) E3 ubiquitin-protein ligase RMA1H1-like	Protein processing in endoplasmic reticulum (ko04141)	Zinc finger, C3HC4 type (RING finger)	E3 ubiquitin-protein ligase RMA1H1 OS=Capsicum annuum OX=4072 GN=RMA1H1 PE=1 SV=1	Posttranslational modification, protein turnover, chaperones	E3 ubiquitin-protein like [Actinidia chinensis var. chinensis]		VaccDscaff2-processed-gene-193.7	--	--	--	zinc-ribbon family	--	Function unknown	hypothetical protein C3L33_21623, partial [Rhododendron williamsianum]		VaccDscaff27-snap-gene-304.52	--	K13434|5.6e-18|gmx:100794593|K13434 pathogenesis-related genes transcriptional activator PTI6 | (RefSeq) pathogenesis-related genes transcriptional activator PTI6	Plant-pathogen interaction (ko04626)	AP2 domain	Ethylene-responsive transcription factor WIN1 OS=Arabidopsis thaliana OX=3702 GN=WIN1 PE=2 SV=1	Transcription	hypothetical protein C3L33_00335, partial [Rhododendron williamsianum]
VaccDscaff6-processed-gene-10.6	General function prediction only	K18208|8.1e-143|vvi:100264528|K18208 renalase [EC:1.6.3.5] | (RefSeq) renalase	--	NAD(P)-binding Rossmann-like domain	--	Function unknown	uncharacterized protein LOC114282720 isoform X1 [Camellia sinensis]		VaccDscaff33-processed-gene-116.4	--	K13496|1.3e-160|qsu:111998643|K13496 UDP-glucosyltransferase 73C [EC:2.4.1.-] | (RefSeq) UDP-glycosyltransferase 73C3-like	Zeatin biosynthesis (ko00908)	UDP-glucoronosyl and UDP-glucosyl transferase	UDP-glycosyltransferase 73C5 OS=Arabidopsis thaliana OX=3702 GN=UGT73C5 PE=2 SV=1	--	UDP-glycosyltransferase [Actinidia chinensis var. chinensis]		VaccDscaff16-augustus-gene-19.19	Energy production and conversion	K03686|8.6e-08|psom:113336137|K03686 molecular chaperone DnaJ | (RefSeq) chaperone protein dnaJ A6, chloroplastic-like	--	DnaJ domain	Chaperone protein dnaJ C76, chloroplastic OS=Arabidopsis thaliana OX=3702 GN=DJC76 PE=2 SV=1	Posttranslational modification, protein turnover, chaperones	chaperone protein dnaJ C76, chloroplastic-like [Camellia sinensis]
VaccDscaff47-processed-gene-47.24	--	--	--	--	F-box protein At3g44326 OS=Arabidopsis thaliana OX=3702 GN=At3g44326 PE=2 SV=1	Function unknown	F-box protein [Actinidia chinensis var. chinensis]		VaccDscaff18-processed-gene-56.6	Posttranslational modification, protein turnover, chaperones	K04506|9.6e-14|csat:104734106|K04506 E3 ubiquitin-protein ligase SIAH1 [EC:2.3.2.27] | (RefSeq) E3 ubiquitin-protein ligase SINA-like 7	Ubiquitin mediated proteolysis (ko04120)	DnaJ domain	--	Posttranslational modification, protein turnover, chaperones	DnaJ protein like [Actinidia chinensis var. chinensis]		VaccDscaff36-augustus-gene-134.27	--	K03860|7.6e-07|nnu:104608881|K03860 phosphatidylinositol N-acetylglucosaminyltransferase subunit Q | (RefSeq) N-acetylglucosaminyl-phosphatidylinositol biosynthetic protein gpi1-like	Glycosylphosphatidylinositol (GPI)-anchor biosynthesis (ko00563)	Gibberellin regulated protein	Snakin-2 OS=Solanum tuberosum OX=4113 GN=SN2 PE=1 SV=1	Function unknown	snakin-2-like [Camellia sinensis]
VaccDscaff10-augustus-gene-139.26	Coenzyme transport and metabolism	K03403|0.0e+00|gra:105799490|K03403 magnesium chelatase subunit H [EC:6.6.1.1] | (RefSeq) magnesium-chelatase subunit ChlH, chloroplastic	Porphyrin and chlorophyll metabolism (ko00860)	CobN/Magnesium Chelatase	Magnesium-chelatase subunit ChlH, chloroplastic OS=Arabidopsis thaliana OX=3702 GN=CHLH PE=1 SV=1	Coenzyme transport and metabolism	Magnesium-chelatase subunit ChlH like [Actinidia chinensis var. chinensis]		VaccDscaff42-augustus-gene-42.28	--	K22484|6.9e-24|pvu:PHAVU_001G121200g|K22484 transcriptional regulator CBF1 | (RefSeq) hypothetical protein	--	Helix-loop-helix DNA-binding domain	Transcription factor bHLH30 OS=Arabidopsis thaliana OX=3702 GN=BHLH30 PE=1 SV=1	Transcription	hypothetical protein F0562_003165 [Nyssa sinensis]		VaccDscaff36-augustus-gene-29.31	--	--	--	--	Protein POST-ILLUMINATION CHLOROPHYLL FLUORESCENCE INCREASE, chloroplastic OS=Arabidopsis thaliana OX=3702 GN=PIFI PE=2 SV=1	Function unknown	Ribulose bisphosphate carboxylase/oxygenase [Actinidia chinensis var. chinensis]
VaccDscaff20-augustus-gene-67.30	--	K09184|1.3e-28|vvi:104879571|K09184 GATA-binding protein, other eukaryote | (RefSeq) GATA transcription factor 8	--	GATA zinc finger	GATA transcription factor 8 OS=Arabidopsis thaliana OX=3702 GN=GATA8 PE=1 SV=1	Transcription	hypothetical protein C3L33_16764, partial [Rhododendron williamsianum]		VaccDscaff24-augustus-gene-3.27	Carbohydrate transport and metabolism	K06611|0.0e+00|vvi:100245269|K06611 stachyose synthetase [EC:2.4.1.67] | (RefSeq) stachyose synthase	Galactose metabolism (ko00052)	Raffinose synthase or seed imbibition protein Sip1	Stachyose synthase OS=Pisum sativum OX=3888 GN=STS1 PE=1 SV=1	Function unknown	hypothetical protein C3L33_07686, partial [Rhododendron williamsianum]		VaccDscaff45-processed-gene-1.5	--	K07195|2.3e-231|vvi:100267121|K07195 exocyst complex component 7 | (RefSeq) exocyst complex component EXO70B1	--	Exo70 exocyst complex subunit	Exocyst complex component EXO70H1 OS=Arabidopsis thaliana OX=3702 GN=EXO70H1 PE=1 SV=1	Function unknown	exocyst complex component EXO70H1-like [Camellia sinensis]
VaccDscaff32-snap-gene-300.31	--	--	--	--	--	Cell cycle control, cell division, chromosome partitioning	hypothetical protein C3L33_01619, partial [Rhododendron williamsianum]		VaccDscaff42-processed-gene-228.8	--	K22985|6.5e-79|csat:104706161|K22985 G protein-coupled receptor 107 | (RefSeq) protein GPR107-like isoform X2	--	Lung seven transmembrane receptor	Protein CANDIDATE G-PROTEIN COUPLED RECEPTOR 7 OS=Arabidopsis thaliana OX=3702 GN=CAND7 PE=2 SV=1	Signal transduction mechanisms	hypothetical protein C3L33_22793, partial [Rhododendron williamsianum]		VaccDscaff4-snap-gene-198.33	Energy production and conversion	K01899|2.3e-42|gmx:100815484|K01899 succinyl-CoA synthetase alpha subunit [EC:6.2.1.4 6.2.1.5] | (RefSeq) succinate--CoA ligase [ADP-forming] subunit alpha, mitochondrial	Citrate cycle (TCA cycle) (ko00020);; Propanoate metabolism (ko00640);; Carbon metabolism (ko01200)	CoA-ligase	Succinate--CoA ligase [ADP-forming] subunit alpha-1, mitochondrial OS=Solanum lycopersicum OX=4081 GN=SCOA PE=1 SV=1	Energy production and conversion	Succinyl-CoA ligase ADP-forming subunit alpha-1 [Nymphaea thermarum]
VaccDscaff43-snap-gene-142.21	Defense mechanisms	K08712|3.4e-136|gsl:Gasu_29800|K08712 ATP-binding cassette, subfamily G (WHITE), member 2, SNQ2 | (RefSeq) ABC transporter, ATP-binding protein	ABC transporters (ko02010)	ABC-2 type transporter	Pleiotropic drug resistance protein 2 OS=Nicotiana plumbaginifolia OX=4092 GN=PDR2 PE=2 SV=1	Secondary metabolites biosynthesis, transport and catabolism	pleiotropic drug resistance 6, partial [Prunus dulcis]		Vaccinium_corymbosum_newGene_13472	--	K22804|1.1e-76|bna:106442438|K22804 structural maintenance of chromosomes protein 6 | (RefSeq) structural maintenance of chromosomes protein 6B-like	--	Reverse transcriptase (RNA-dependent DNA polymerase)	--	Function unknown	uncharacterized protein LOC114270721 [Camellia sinensis]		VaccDscaff23-snap-gene-342.39	--	K03695|5.8e-07|adu:107486671|K03695 ATP-dependent Clp protease ATP-binding subunit ClpB | (RefSeq) LOW QUALITY PROTEIN: chaperone protein ClpB3, chloroplastic-like	--	Jacalin-like lectin domain	Mannose/glucose-specific lectin (Fragment) OS=Parkia platycephala OX=185447 PE=1 SV=1	Function unknown	Mannose-binding lectin [Cynara cardunculus var. scolymus]
Vaccinium_corymbosum_newGene_10808	--	--	--	Ankyrin repeats (many copies)	--	Replication, recombination and repair	hypothetical protein C3L33_03925, partial [Rhododendron williamsianum]		VaccDscaff14-processed-gene-361.1	Lipid transport and metabolism	K20506|3.3e-81|egu:105060863|K20506 tuliposide A-converting enzyme [EC:4.2.99.22] | (RefSeq) tuliposide A-converting enzyme 2, chloroplastic-like	--	alpha/beta hydrolase fold	Probable carboxylesterase 2 OS=Arabidopsis thaliana OX=3702 GN=CXE2 PE=2 SV=1	Defense mechanisms	probable carboxylesterase 12 [Camellia sinensis]		VaccDscaff3-snap-gene-408.35	Defense mechanisms	K05681|1.3e-189|nau:109228191|K05681 ATP-binding cassette, subfamily G (WHITE), member 2 | (RefSeq) ABC transporter G family member 9-like	ABC transporters (ko02010)	ABC-2 type transporter	ABC transporter G family member 14 OS=Arabidopsis thaliana OX=3702 GN=ABCG14 PE=1 SV=1	Defense mechanisms	ABC transporter G family member 14-like [Camellia sinensis]
VaccDscaff21-augustus-gene-200.37	Secondary metabolites biosynthesis, transport and catabolism	K24028|1.2e-71|cam:101505284|K24028 salicylic acid 3-hydroxylase [EC:1.14.11.-] | (RefSeq) 1-aminocyclopropane-1-carboxylate oxidase-like	--	2OG-Fe(II) oxygenase superfamily	Probable 2-oxoglutarate-dependent dioxygenase SLC1 OS=Oryza sativa subsp. japonica OX=39947 GN=SLC1 PE=2 SV=1	Secondary metabolites biosynthesis, transport and catabolism	hypothetical protein C3L33_02736, partial [Rhododendron williamsianum]		VaccDscaff4-augustus-gene-235.20	--	--	--	PDDEXK-like family of unknown function	--	Function unknown	hypothetical protein C3L33_15524, partial [Rhododendron williamsianum]		VaccDscaff15-processed-gene-210.5	--	--	--	Aspartic acid proteinase inhibitor	--	--	hypothetical protein C3L33_05782, partial [Rhododendron williamsianum]
VaccDscaff32-snap-gene-325.57	--	K10752|2.3e-50|zju:107427343|K10752 histone-binding protein RBBP4 | (RefSeq) LOW QUALITY PROTEIN: WD-40 repeat-containing protein MSI3	--	Heavy-metal-associated domain	Heavy metal-associated isoprenylated plant protein 26 OS=Arabidopsis thaliana OX=3702 GN=HIPP26 PE=1 SV=1	Inorganic ion transport and metabolism	hypothetical protein C3L33_01728, partial [Rhododendron williamsianum]		Vaccinium_corymbosum_newGene_19257	--	K05391|2.2e-93|sind:105170282|K05391 cyclic nucleotide gated channel, plant | (RefSeq) protein CNGC15b isoform X2	Plant-pathogen interaction (ko04626)	Ion transport protein	Protein CNGC15c OS=Medicago truncatula OX=3880 GN=CNGC15C PE=1 SV=1	Inorganic ion transport and metabolism	Protein CNGC15c like [Actinidia chinensis var. chinensis]		NewGene_14882	--	K01873|1.45e-104|nau:109209380|K01873 valyl-tRNA synthetase [EC:6.1.1.9] | (RefSeq) valine--tRNA ligase, mitochondrial 1-like	Aminoacyl-tRNA biosynthesis (ko00970)	Reverse transcriptase (RNA-dependent DNA polymerase)	Retrovirus-related Pol polyprotein from transposon TNT 1-94 OS=Nicotiana tabacum OX=4097 PE=2 SV=1	Replication, recombination and repair	Endonuclease [Actinidia chinensis var. chinensis]
VaccDscaff35-augustus-gene-29.25	--	K14484|1.9e-96|csv:101205299|K14484 auxin-responsive protein IAA | (RefSeq) auxin-responsive protein IAA14	Plant hormone signal transduction (ko04075)	AUX/IAA family	Auxin-responsive protein IAA14 OS=Arabidopsis thaliana OX=3702 GN=IAA14 PE=1 SV=2	Transcription	hypothetical protein HYC85_003367 [Camellia sinensis]		VaccDscaff27-snap-gene-85.30	Carbohydrate transport and metabolism	K15920|1.8e-49|pper:18789349|K15920 xylan 1,4-beta-xylosidase [EC:3.2.1.37] | (RefSeq) beta-xylosidase/alpha-L-arabinofuranosidase 2	Amino sugar and nucleotide sugar metabolism (ko00520)	--	Beta-D-xylosidase 4 OS=Arabidopsis thaliana OX=3702 GN=BXL4 PE=1 SV=1	Carbohydrate transport and metabolism	hypothetical protein C3L33_22216, partial [Rhododendron williamsianum]		VaccDscaff41-snap-gene-4.26	--	K15104|9.7e-139|psom:113289439|K15104 solute carrier family 25 (mitochondrial oxoglutarate transporter), member 11 | (RefSeq) mitochondrial uncoupling protein 5-like	--	Mitochondrial carrier protein	Mitochondrial uncoupling protein 5 OS=Arabidopsis thaliana OX=3702 GN=PUMP5 PE=2 SV=1	Function unknown	hypothetical protein C3L33_10743, partial [Rhododendron williamsianum]
VaccDscaff22-processed-gene-368.11	Signal transduction mechanisms	--	--	CP12 domain	Calvin cycle protein CP12-1, chloroplastic OS=Arabidopsis thaliana OX=3702 GN=CP12-1 PE=1 SV=1	Function unknown	hypothetical protein C3L33_03972, partial [Rhododendron williamsianum]		VaccDscaff34-augustus-gene-289.34	General function prediction only	K03238|5.4e-68|nau:109239061|K03238 translation initiation factor 2 subunit 2 | (RefSeq) eukaryotic translation initiation factor 2 subunit beta-like	RNA transport (ko03013)	Domain found in IF2B/IF5	Eukaryotic translation initiation factor 2 subunit beta OS=Triticum aestivum OX=4565 PE=1 SV=1	Translation, ribosomal structure and biogenesis	Translation initiation factor IF2/IF5 [Macleaya cordata]		VaccDscaff83-snap-gene-0.28	Carbohydrate transport and metabolism	K01623|2.3e-180|spen:107025910|K01623 fructose-bisphosphate aldolase, class I [EC:4.1.2.13] | (RefSeq) fructose-bisphosphate aldolase, cytoplasmic isozyme 1	Glycolysis / Gluconeogenesis (ko00010);; Pentose phosphate pathway (ko00030);; Fructose and mannose metabolism (ko00051);; Carbon fixation in photosynthetic organisms (ko00710);; Carbon metabolism (ko01200);; Biosynthesis of amino acids (ko01230)	Fructose-bisphosphate aldolase class-I	Fructose-bisphosphate aldolase, cytoplasmic isozyme 1 OS=Pisum sativum OX=3888 PE=2 SV=1	Carbohydrate transport and metabolism	Fructose-bisphosphate aldolase [Actinidia chinensis var. chinensis]
VaccDscaff15-augustus-gene-367.26	General function prediction only	K24205|6.8e-103|sind:105163305|K24205 protein lifeguard | (RefSeq) BI1-like protein	--	--	Protein LIFEGUARD 4 OS=Arabidopsis thaliana OX=3702 GN=LFG4 PE=2 SV=1	Signal transduction mechanisms	hypothetical protein HYC85_031292 [Camellia sinensis]		VaccDscaff33-augustus-gene-95.19	--	--	--	--	--	Signal transduction mechanisms	Disease resistance protein, partial [Actinidia chinensis var. chinensis]		VaccDscaff34-processed-gene-267.0	--	--	--	Plant protein of unknown function	UPF0481 protein At3g47200 OS=Arabidopsis thaliana OX=3702 GN=At3g47200 PE=2 SV=1	Function unknown	hypothetical protein C3L33_20093, partial [Rhododendron williamsianum]
VaccDscaff12-augustus-gene-18.36	--	K19791|1.4e-40|cam:101506817|K19791 iron transport multicopper oxidase | (RefSeq) L-ascorbate oxidase homolog	--	Multicopper oxidase	L-ascorbate oxidase homolog OS=Nicotiana tabacum OX=4097 PE=2 SV=1	Secondary metabolites biosynthesis, transport and catabolism	hypothetical protein C3L33_01204, partial [Rhododendron williamsianum]		VaccDscaff3-augustus-gene-216.28	--	K15171|7.1e-62|ini:109170364|K15171 transcription elongation factor SPT4 | (RefSeq) transcription elongation factor SPT4 homolog 2-like	--	Spt4/RpoE2 zinc finger	Transcription elongation factor SPT4 homolog 2 OS=Arabidopsis thaliana OX=3702 GN=At5g63670 PE=1 SV=1	Transcription	transcription elongation factor SPT4 homolog 2-like isoform X2 [Hevea brasiliensis]		VaccDscaff24-processed-gene-120.3	--	--	--	Pollen protein Ole e 1 like	--	Function unknown	hypothetical protein C3L33_06719, partial [Rhododendron williamsianum]
VaccDscaff10-augustus-gene-90.16	--	K17506|8.4e-21|mng:MNEG_3991|K17506 protein phosphatase 1L [EC:3.1.3.16] | (RefSeq) hypothetical protein	--	Protein phosphatase 2C	Probable protein phosphatase 2C 52 OS=Arabidopsis thaliana OX=3702 GN=At4g03415 PE=1 SV=1	Signal transduction mechanisms	Protein like [Actinidia chinensis var. chinensis]		VaccDscaff16-snap-gene-155.35	--	K00600|1.4e-08|dzi:111286330|K00600 glycine hydroxymethyltransferase [EC:2.1.2.1] | (RefSeq) serine hydroxymethyltransferase 3, chloroplastic-like isoform X1	Glycine, serine and threonine metabolism (ko00260);; Cyanoamino acid metabolism (ko00460);; Glyoxylate and dicarboxylate metabolism (ko00630);; One carbon pool by folate (ko00670);; Carbon metabolism (ko01200);; Biosynthesis of amino acids (ko01230)	PITH domain	PITH domain-containing protein At3g04780 OS=Arabidopsis thaliana OX=3702 GN=At3g04780 PE=1 SV=2	Posttranslational modification, protein turnover, chaperones	PITH domain-containing protein [Actinidia chinensis var. chinensis]		VaccDscaff25-augustus-gene-325.40	Translation, ribosomal structure and biogenesis	K09122|5.4e-18|cme:CYME_CMD071C|K09122 uncharacterized protein | (RefSeq) unknown ribonuclease	--	3'-5' exonuclease	--	Function unknown	hypothetical protein C3L33_21459, partial [Rhododendron williamsianum]
VaccDscaff7-snap-gene-187.32	--	K17426|1.3e-93|vvi:100244147|K17426 large subunit ribosomal protein L45 | (RefSeq) 39S ribosomal protein L45, mitochondrial	--	Tim44-like domain	--	Translation, ribosomal structure and biogenesis	uncharacterized protein LOC114288142 isoform X2 [Camellia sinensis]		VaccDscaff40-augustus-gene-88.29	Coenzyme transport and metabolism	K00559|4.7e-07|hbr:110634256|K00559 sterol 24-C-methyltransferase [EC:2.1.1.41] | (RefSeq) cycloartenol-C-24-methyltransferase-like	Steroid biosynthesis (ko00100)	Methyltransferase domain	Uncharacterized methyltransferase At1g78140, chloroplastic OS=Arabidopsis thaliana OX=3702 GN=At1g78140 PE=1 SV=1	Coenzyme transport and metabolism	hypothetical protein C3L33_22438, partial [Rhododendron williamsianum]		VaccDscaff8-augustus-gene-354.36	Amino acid transport and metabolism	K18787|3.0e-169|qsu:112037415|K18787 thermospermine synthase [EC:2.5.1.79] | (RefSeq) thermospermine synthase ACAULIS5-like	--	Spermine/spermidine synthase domain	Thermospermine synthase ACAULIS5 OS=Arabidopsis thaliana OX=3702 GN=ACL5 PE=1 SV=1	Amino acid transport and metabolism	hypothetical protein F0562_000317 [Nyssa sinensis]
VaccDscaff37-augustus-gene-26.31	--	K07976|9.0e-94|cic:CICLE_v10017974mg|K07976 Rab family, other | (RefSeq) hypothetical protein	--	Ras family	GTP-binding protein yptV5 OS=Volvox carteri OX=3067 GN=YPTV5 PE=3 SV=1	Function unknown	Septum-promoting GTP-binding protein [Actinidia chinensis var. chinensis]		VaccDscaff24-snap-gene-207.32	--	K01728|6.1e-33|zju:107419134|K01728 pectate lyase [EC:4.2.2.2] | (RefSeq) pectate lyase 1-like	Pentose and glucuronate interconversions (ko00040)	Domain of unknown function (DUF4220)	--	Function unknown	hypothetical protein C3L33_07746, partial [Rhododendron williamsianum]		VaccDscaff22-snap-gene-267.31	--	--	--	--	Interactor of constitutive active ROPs 3 OS=Arabidopsis thaliana OX=3702 GN=ICR3 PE=1 SV=1	Function unknown	hypothetical protein C3L33_04622, partial [Rhododendron williamsianum]
VaccDscaff39-snap-gene-210.40	Carbohydrate transport and metabolism	K08235|1.9e-103|ini:109187679|K08235 xyloglucan:xyloglucosyl transferase [EC:2.4.1.207] | (RefSeq) xyloglucan endotransglucosylase/hydrolase protein 15-like	--	Glycosyl hydrolases family 16	Xyloglucan endotransglucosylase/hydrolase protein 22 OS=Arabidopsis thaliana OX=3702 GN=XTH22 PE=1 SV=1	Carbohydrate transport and metabolism	xyloglucan endotransglucosylase/hydrolase 7 [Actinidia deliciosa]		VaccDscaff34-processed-gene-11.7	--	K09285|8.2e-15|obr:102701992|K09285 AP2-like factor, ANT lineage | (RefSeq) AP2-like ethylene-responsive transcription factor ANT	--	--	Protein BIG GRAIN 1-like A OS=Arabidopsis thaliana OX=3702 GN=At3g13980 PE=3 SV=1	Function unknown	hypothetical protein C3L33_00135, partial [Rhododendron williamsianum]		NewGene_4655	--	--	--	--	--	--	hypothetical protein C3L33_19770, partial [Rhododendron williamsianum]
VaccDscaff19-augustus-gene-312.37	--	K00521|8.0e-36|cmos:111447866|K00521 ferric-chelate reductase [EC:1.16.1.7] | (RefSeq) ferric reduction oxidase 7, chloroplastic-like	--	No apical meristem (NAM) protein	NAC domain-containing protein 90 OS=Arabidopsis thaliana OX=3702 GN=NAC090 PE=1 SV=1	Transcription	hypothetical protein TEA_007753 [Camellia sinensis var. sinensis]		VaccDscaff20-snap-gene-279.31	--	K16241|2.1e-45|cic:CICLE_v10009720mg|K16241 transcription factor HY5 | (RefSeq) hypothetical protein	Circadian rhythm - plant (ko04712)	bZIP transcription factor	Transcription factor HY5 OS=Solanum lycopersicum OX=4081 GN=HY5 PE=2 SV=1	Transcription	Transcription factor like [Actinidia chinensis var. chinensis]		VaccDscaff14-augustus-gene-17.25	--	K19861|1.4e-155|vvi:100252759|K19861 benzyl alcohol O-benzoyltransferase [EC:2.3.1.196 2.3.1.232] | (RefSeq) methanol O-anthraniloyltransferase	--	Transferase family	Methanol O-anthraniloyltransferase OS=Vitis labrusca OX=103355 GN=AMAT PE=1 SV=1	Function unknown	Methanol O-anthraniloyltransferase [Actinidia chinensis var. chinensis]
VaccDscaff20-augustus-gene-68.35	--	K12930|1.5e-152|dcr:108213096|K12930 anthocyanidin 3-O-glucosyltransferase [EC:2.4.1.115] | (RefSeq) kaempferol 3-O-beta-D-galactosyltransferase-like	Anthocyanin biosynthesis (ko00942)	UDP-glucoronosyl and UDP-glucosyl transferase	Anthocyanidin 3-O-galactosyltransferase F3GT1 OS=Actinidia chinensis var. chinensis OX=1590841 GN=F3GT1 PE=1 SV=1	Carbohydrate transport and metabolism	hypothetical protein C3L33_16768, partial [Rhododendron williamsianum]		VaccDscaff16-processed-gene-2.6	--	K13448|3.5e-42|pop:112323374|K13448 calcium-binding protein CML | (RefSeq) calcium-binding protein CML38	Plant-pathogen interaction (ko04626)	EF-hand domain pair	Putative calcium-binding protein CML19 OS=Oryza sativa subsp. japonica OX=39947 GN=CML19 PE=3 SV=1	Signal transduction mechanisms	hypothetical protein C3L33_19136, partial [Rhododendron williamsianum]		VaccDscaff3-processed-gene-424.9	--	--	--	--	--	Function unknown	hypothetical protein C3L33_21736, partial [Rhododendron williamsianum]
VaccDscaff3-augustus-gene-201.21	--	K00521|1.6e-31|cmos:111447866|K00521 ferric-chelate reductase [EC:1.16.1.7] | (RefSeq) ferric reduction oxidase 7, chloroplastic-like	--	No apical meristem (NAM) protein	NAC domain-containing protein 83 OS=Arabidopsis thaliana OX=3702 GN=NAC083 PE=1 SV=1	Transcription	hypothetical protein C3L33_13320, partial [Rhododendron williamsianum]		VaccDscaff49-augustus-gene-5.22	--	K19892|9.0e-72|boe:106295886|K19892 glucan endo-1,3-beta-glucosidase 4 [EC:3.2.1.39] | (RefSeq) glucan endo-1,3-beta-glucosidase 4	Starch and sucrose metabolism (ko00500)	Glycosyl hydrolases family 17	Glucan endo-1,3-beta-glucosidase 11 OS=Arabidopsis thaliana OX=3702 GN=At1g32860 PE=2 SV=1	Carbohydrate transport and metabolism	hypothetical protein C3L33_16184, partial [Rhododendron williamsianum]		VaccDscaff21-augustus-gene-32.28	Energy production and conversion;; Amino acid transport and metabolism	K00052|2.1e-193|han:110865665|K00052 3-isopropylmalate dehydrogenase [EC:1.1.1.85] | (RefSeq) 3-isopropylmalate dehydrogenase, chloroplastic-like	Valine, leucine and isoleucine biosynthesis (ko00290);; C5-Branched dibasic acid metabolism (ko00660);; 2-Oxocarboxylic acid metabolism (ko01210);; Biosynthesis of amino acids (ko01230)	Isocitrate/isopropylmalate dehydrogenase	3-isopropylmalate dehydrogenase 2, chloroplastic OS=Arabidopsis thaliana OX=3702 GN=IMDH2 PE=1 SV=1	Amino acid transport and metabolism	hypothetical protein C3L33_00377, partial [Rhododendron williamsianum]
VaccDscaff11-processed-gene-248.2	Energy production and conversion	K22395|6.0e-185|nsy:104227327|K22395 cinnamyl-alcohol dehydrogenase [EC:1.1.1.195] | (RefSeq) cannabidiolic acid synthase-like	Phenylpropanoid biosynthesis (ko00940)	FAD binding domain	Berberine bridge enzyme-like 8 OS=Arabidopsis thaliana OX=3702 GN=At1g30700 PE=2 SV=1	Energy production and conversion	hypothetical protein C3L33_08651, partial [Rhododendron williamsianum]		VaccDscaff9-snap-gene-251.28	--	K20769|3.9e-15|mesc:110611169|K20769 fatty acid omega-hydroxylase [EC:1.14.-.-] | (RefSeq) cytochrome P450 94A2-like	Cutin, suberine and wax biosynthesis (ko00073)	Potato inhibitor I family	Glu S.griseus protease inhibitor OS=Momordica charantia OX=3673 PE=1 SV=1	Function unknown	hypothetical protein C3L33_09172, partial [Rhododendron williamsianum]		VaccDscaff11-augustus-gene-350.31	--	K17275|0.0e+00|nsy:104232450|K17275 plastin-1 | (RefSeq) fimbrin-like protein 2	--	Calponin homology (CH) domain	Fimbrin-2 OS=Arabidopsis thaliana OX=3702 GN=FIM2 PE=2 SV=1	Cytoskeleton	hypothetical protein C3L33_07236, partial [Rhododendron williamsianum]
VaccDscaff13-augustus-gene-12.18	--	--	--	Pollen protein Ole e 1 like	Protein DOWNSTREAM OF FLC OS=Arabidopsis thaliana OX=3702 GN=DFC PE=2 SV=1	Function unknown	hypothetical protein C3L33_01906, partial [Rhododendron williamsianum]		VaccDscaff28-augustus-gene-69.16	--	K18834|1.1e-16|ghi:107954934|K18834 WRKY transcription factor 1 | (RefSeq) WRKY transcription factor 1-like	Plant-pathogen interaction (ko04626)	WRKY DNA -binding domain	Probable WRKY transcription factor 40 OS=Arabidopsis thaliana OX=3702 GN=WRKY40 PE=1 SV=1	Transcription	hypothetical protein C3L33_15966, partial [Rhododendron williamsianum]		VaccDscaff42-augustus-gene-49.30	Carbohydrate transport and metabolism	K01087|4.4e-139|dcr:108215772|K01087 trehalose 6-phosphate phosphatase [EC:3.1.3.12] | (RefSeq) probable trehalose-phosphate phosphatase J	Starch and sucrose metabolism (ko00500)	Trehalose-phosphatase	Probable trehalose-phosphate phosphatase J OS=Arabidopsis thaliana OX=3702 GN=TPPJ PE=1 SV=1	Carbohydrate transport and metabolism	Trehalose-phosphate phosphatase [Actinidia chinensis var. chinensis]
VaccDscaff13-augustus-gene-106.30	--	K01537|5.1e-45|jcu:105638585|K01537 P-type Ca2+ transporter type 2C [EC:7.2.2.10] | (RefSeq) calcium-transporting ATPase 2, plasma membrane-type isoform X1	--	C2 domain	Protein C2-DOMAIN ABA-RELATED 5 OS=Arabidopsis thaliana OX=3702 GN=CAR5 PE=2 SV=1	Function unknown	hypothetical protein C3L33_06338, partial [Rhododendron williamsianum]		VaccDscaff28-augustus-gene-209.30	General function prediction only	K13420|9.7e-45|ppp:112280767|K13420 LRR receptor-like serine/threonine-protein kinase FLS2 [EC:2.7.11.1] | (RefSeq) LRR receptor-like serine/threonine-protein kinase FLS2 isoform X1	MAPK signaling pathway - plant (ko04016)	Protein kinase domain	Receptor protein kinase-like protein ZAR1 OS=Arabidopsis thaliana OX=3702 GN=ZAR1 PE=1 SV=1	Signal transduction mechanisms	hypothetical protein C3L33_17114, partial [Rhododendron williamsianum]		VaccDscaff27-augustus-gene-338.29	--	K09422|3.0e-71|tcc:18596214|K09422 transcription factor MYB, plant | (RefSeq) transcription factor MYB114	--	Myb-like DNA-binding domain	Transcription factor MYB3 OS=Crocosmia x crocosmiiflora OX=1053288 GN=MYB3 PE=2 SV=1	Transcription	transcription factor MYB114-like [Camellia sinensis]
VaccDscaff4-augustus-gene-57.36	General function prediction only	K07950|3.6e-97|sind:105158415|K07950 ADP-ribosylation factor-like protein 5B | (RefSeq) ADP-ribosylation factor-like protein 5	--	ADP-ribosylation factor family	ADP-ribosylation factor 1 OS=Salix bakko OX=72444 GN=ARF1 PE=2 SV=3	Intracellular trafficking, secretion, and vesicular transport	ADP-ribosylation factor-like protein 5 [Coffea arabica]		VaccDscaff14-augustus-gene-76.19	Cell wall/membrane/envelope biogenesis	K08679|1.4e-222|vvi:100241904|K08679 UDP-glucuronate 4-epimerase [EC:5.1.3.6] | (RefSeq) UDP-glucuronate 4-epimerase 6	Amino sugar and nucleotide sugar metabolism (ko00520)	GDP-mannose 4,6 dehydratase	UDP-glucuronate 4-epimerase 6 OS=Arabidopsis thaliana OX=3702 GN=GAE6 PE=1 SV=1	Cell wall/membrane/envelope biogenesis	PREDICTED: UDP-glucuronate 4-epimerase 6 [Vitis vinifera]		VaccDscaff36-augustus-gene-124.30	--	K20027|9.3e-230|vvi:100264317|K20027 palmitoyltransferase ZDHHC1/11 [EC:2.3.1.225] | (RefSeq) probable protein S-acyltransferase 22	--	DHHC palmitoyltransferase	Probable protein S-acyltransferase 22 OS=Arabidopsis thaliana OX=3702 GN=PAT22 PE=2 SV=2	Function unknown	hypothetical protein C3L33_14109, partial [Rhododendron williamsianum]
VaccDscaff10-snap-gene-359.40	--	K00430|2.5e-133|oeu:111375802|K00430 peroxidase [EC:1.11.1.7] | (RefSeq) peroxidase 3-like	Phenylpropanoid biosynthesis (ko00940)	Peroxidase	Peroxidase 3 OS=Arabidopsis thaliana OX=3702 GN=PER3 PE=2 SV=1	Secondary metabolites biosynthesis, transport and catabolism	hypothetical protein HYC85_013017 [Camellia sinensis]		VaccDscaff25-augustus-gene-39.18	General function prediction only	K04708|2.6e-10|mtr:MTR_6g009130|K04708 3-dehydrosphinganine reductase [EC:1.1.1.102] | (RefSeq) transmembrane protein, putative	Sphingolipid metabolism (ko00600)	NAD(P)H-binding	Uncharacterized protein At1g32220, chloroplastic OS=Arabidopsis thaliana OX=3702 GN=At1g32220 PE=1 SV=1	--	hypothetical protein HYC85_027039 [Camellia sinensis]		VaccDscaff12-processed-gene-137.3	--	K15104|9.0e-147|psom:113289439|K15104 solute carrier family 25 (mitochondrial oxoglutarate transporter), member 11 | (RefSeq) mitochondrial uncoupling protein 5-like	--	Mitochondrial carrier protein	Mitochondrial uncoupling protein 5 OS=Arabidopsis thaliana OX=3702 GN=PUMP5 PE=2 SV=1	Function unknown	hypothetical protein C3L33_10743, partial [Rhododendron williamsianum]
VaccDscaff2-augustus-gene-316.29	--	--	--	ABA/WDS induced protein	Abscisic stress-ripening protein 2 OS=Solanum lycopersicum OX=4081 GN=ASR2 PE=3 SV=1	--	abscisic stress-ripening protein 2-like [Chenopodium quinoa]		VaccDscaff662-augustus-gene-0.11	Posttranslational modification, protein turnover, chaperones	K03671|2.7e-45|jcu:105649401|K03671 thioredoxin 1 | (RefSeq) thioredoxin-like protein CXXS1	--	Thioredoxin	Thioredoxin-like protein CXXS1 OS=Arabidopsis thaliana OX=3702 GN=CXXS1 PE=2 SV=2	Posttranslational modification, protein turnover, chaperones	thioredoxin-like protein CXXS1 [Camellia sinensis]		VaccDscaff6-snap-gene-122.35	--	K19476|1.9e-129|qsu:111998584|K19476 vacuolar protein sorting-associated protein IST1 | (RefSeq) uncharacterized protein LOC111998584	Endocytosis (ko04144)	Regulator of Vps4 activity in the MVB pathway	--	Function unknown	hypothetical protein C3L33_10474, partial [Rhododendron williamsianum]
VaccDscaff40-snap-gene-77.33	--	K00020|4.6e-21|mtr:MTR_8g088900|K00020 3-hydroxyisobutyrate dehydrogenase [EC:1.1.1.31] | (RefSeq) 6-phosphogluconate dehydrogenase-like protein	Valine, leucine and isoleucine degradation (ko00280)	Phosphate-induced protein 1 conserved region	Protein PHOSPHATE-INDUCED 1 OS=Nicotiana tabacum OX=4097 GN=PHI-1 PE=2 SV=1	Replication, recombination and repair	hypothetical protein F0562_027718 [Nyssa sinensis]		VaccDscaff3-augustus-gene-417.23	Carbohydrate transport and metabolism	K09874|2.6e-148|hbr:110633960|K09874 aquaporin NIP | (RefSeq) probable aquaporin NIP5-1	--	Major intrinsic protein	Aquaporin NIP3-1 OS=Oryza sativa subsp. japonica OX=39947 GN=NIP3-1 PE=2 SV=2	Carbohydrate transport and metabolism	probable aquaporin NIP5-1 [Hevea brasiliensis]		VaccDscaff23-snap-gene-87.18	Lipid transport and metabolism	K15813|0.0e+00|qsu:111984348|K15813 beta-amyrin synthase [EC:5.4.99.39] | (RefSeq) beta-amyrin synthase isoform X1	Sesquiterpenoid and triterpenoid biosynthesis (ko00909)	Squalene-hopene cyclase C-terminal domain	Taraxerol synthase OS=Kalanchoe daigremontiana OX=23013 PE=1 SV=1	Lipid transport and metabolism	beta-amyrin synthase-like [Camellia sinensis]
VaccDscaff791-augustus-gene-0.4	--	--	--	Plastocyanin-like domain	Uclacyanin 1 OS=Arabidopsis thaliana OX=3702 GN=UCC1 PE=1 SV=1	Function unknown	hypothetical protein C3L33_08129, partial [Rhododendron williamsianum]		VaccDscaff43-snap-gene-235.43	--	--	--	A20-like zinc finger	Zinc finger A20 and AN1 domain-containing stress-associated protein 1 OS=Arabidopsis thaliana OX=3702 GN=SAP1 PE=1 SV=1	Function unknown	hypothetical protein GOBAR_AA13359 [Gossypium barbadense]		VaccDscaff42-processed-gene-201.6	Posttranslational modification, protein turnover, chaperones	K15333|9.0e-89|nsy:104224633|K15333 tRNA guanosine-2'-O-methyltransferase [EC:2.1.1.34] | (RefSeq) uncharacterized protein LOC104224633	--	Subtilase family	Subtilisin-like protease SBT1.6 OS=Arabidopsis thaliana OX=3702 GN=SBT1.6 PE=2 SV=1	Posttranslational modification, protein turnover, chaperones	Subtilisin-like protease [Actinidia chinensis var. chinensis]
VaccDscaff22-processed-gene-156.4	--	K09286|1.1e-61|nnu:104610488|K09286 EREBP-like factor | (RefSeq) ethylene-responsive transcription factor ERF105-like	--	AP2 domain	Ethylene-responsive transcription factor 5 OS=Nicotiana tabacum OX=4097 GN=ERF5 PE=2 SV=1	Transcription	hypothetical protein C3L33_08712, partial [Rhododendron williamsianum]		VaccDscaff48-processed-gene-25.3	--	--	--	--	--	--	Alpha-internexin like [Actinidia chinensis var. chinensis]		VaccDscaff14-augustus-gene-115.38	Lipid transport and metabolism;; General function prediction only	K00108|1.4e-248|han:110864354|K00108 choline dehydrogenase [EC:1.1.99.1] | (RefSeq) protein HOTHEAD-like	Glycine, serine and threonine metabolism (ko00260)	GMC oxidoreductase	Protein HOTHEAD OS=Arabidopsis thaliana OX=3702 GN=HTH PE=1 SV=1	Amino acid transport and metabolism	hypothetical protein HYC85_026614 [Camellia sinensis]
VaccDscaff12-processed-gene-237.0	--	K00020|1.5e-21|mtr:MTR_8g088900|K00020 3-hydroxyisobutyrate dehydrogenase [EC:1.1.1.31] | (RefSeq) 6-phosphogluconate dehydrogenase-like protein	Valine, leucine and isoleucine degradation (ko00280)	Phosphate-induced protein 1 conserved region	Protein PHOSPHATE-INDUCED 1 OS=Nicotiana tabacum OX=4097 GN=PHI-1 PE=2 SV=1	Replication, recombination and repair	hypothetical protein C3L33_10694, partial [Rhododendron williamsianum]		VaccDscaff2-snap-gene-302.56	--	K12129|2.5e-07|ppp:112293145|K12129 pseudo-response regulator 7 | (RefSeq) two-component response regulator-like PRR37 isoform X1	Circadian rhythm - plant (ko04712)	CCT motif	Zinc finger protein CONSTANS-LIKE 16 OS=Arabidopsis thaliana OX=3702 GN=COL16 PE=1 SV=2	Transcription	hypothetical protein C3L33_13747, partial [Rhododendron williamsianum]		VaccDscaff465-augustus-gene-0.20	Translation, ribosomal structure and biogenesis	--	--	Ribosomal protein L11 methyltransferase (PrmA)	--	Translation, ribosomal structure and biogenesis	uncharacterized protein LOC114319508 isoform X1 [Camellia sinensis]
VaccDscaff19-processed-gene-75.12	Carbohydrate transport and metabolism	--	--	Cupin	Germin-like protein subfamily 3 member 2 OS=Arabidopsis thaliana OX=3702 GN=At3g10080 PE=2 SV=1	Function unknown	Germin-like protein subfamily 3 member [Actinidia chinensis var. chinensis]		VaccDscaff45-augustus-gene-25.23	--	--	--	Domain of unknown function (DUF3527)	--	Function unknown	hypothetical protein C3L33_20368, partial [Rhododendron williamsianum]		VaccDscaff28-augustus-gene-212.25	--	K09775|5.1e-11|dzi:111283728|K09775 uncharacterized protein | (RefSeq) uncharacterized protein LOC111283728 isoform X1	--	Core-2/I-Branching enzyme	Glycosyltransferase BC10 OS=Oryza sativa subsp. japonica OX=39947 GN=BC10 PE=1 SV=1	Function unknown	hypothetical protein C3L33_17105, partial [Rhododendron williamsianum]
VaccDscaff31-augustus-gene-149.21	Amino acid transport and metabolism	K14638|4.2e-213|cmax:111496854|K14638 solute carrier family 15 (peptide/histidine transporter), member 3/4 | (RefSeq) protein NRT1/ PTR FAMILY 4.5-like	--	POT family	Protein NRT1/ PTR FAMILY 4.6 OS=Arabidopsis thaliana OX=3702 GN=NPF4.6 PE=1 SV=1	Amino acid transport and metabolism	Protein NRT1/ PTR FAMILY 4.3 like, partial [Actinidia chinensis var. chinensis]		VaccDscaff4-processed-gene-136.5	--	K15272|8.0e-30|gab:108457922|K15272 solute carrier family 35 (UDP-sugar transporter), member A1/2/3 | (RefSeq) CMP-sialic acid transporter 4	--	Nucleotide-sugar transporter	CMP-sialic acid transporter 3 OS=Arabidopsis thaliana OX=3702 GN=UTR6 PE=2 SV=1	Carbohydrate transport and metabolism	CMP-sialic acid transporter 3 like [Actinidia chinensis var. chinensis]		VaccDscaff9-augustus-gene-115.31	--	K12462|7.5e-93|cqi:110701922|K12462 Rho GDP-dissociation inhibitor | (RefSeq) rho GDP-dissociation inhibitor 1-like	--	RHO protein GDP dissociation inhibitor	Rho GDP-dissociation inhibitor 1 OS=Arabidopsis thaliana OX=3702 GN=GDI1 PE=1 SV=1	Posttranslational modification, protein turnover, chaperones	rho GDP-dissociation inhibitor 1-like isoform X1 [Camellia sinensis]
VaccDscaff14-processed-gene-214.9	--	--	--	WD domain, G-beta repeat	Protein JINGUBANG OS=Arabidopsis thaliana OX=3702 GN=JGB PE=1 SV=1	Function unknown	Myosin heavy chain kinase [Actinidia chinensis var. chinensis]		VaccDscaff2-augustus-gene-37.30	Coenzyme transport and metabolism	K23872|5.5e-142|egu:105043413|K23872 putative homogalacturonan methyltransferase [EC:2.1.1.-] | (RefSeq) probable methyltransferase PMT13 isoform X1	--	Putative S-adenosyl-L-methionine-dependent methyltransferase	Probable methyltransferase PMT21 OS=Arabidopsis thaliana OX=3702 GN=ERD3 PE=2 SV=1	Function unknown	Methyltransferase [Actinidia chinensis var. chinensis]		VaccDscaff5-augustus-gene-229.24	Carbohydrate transport and metabolism	K09873|4.1e-123|qsu:112001048|K09873 aquaporin TIP | (RefSeq) aquaporin TIP1-1	--	Major intrinsic protein	Aquaporin TIP1-1 OS=Arabidopsis thaliana OX=3702 GN=TIP1-1 PE=1 SV=1	Carbohydrate transport and metabolism	hypothetical protein C3L33_12381, partial [Rhododendron williamsianum]
VaccDscaff23-processed-gene-193.21	--	--	--	Protein BYPASS1-related	--	Function unknown	protein BPS1, chloroplastic-like [Camellia sinensis]		VaccDscaff14-augustus-gene-124.25	Posttranslational modification, protein turnover, chaperones	K00799|3.6e-88|mdm:103427999|K00799 glutathione S-transferase [EC:2.5.1.18] | (RefSeq) probable glutathione S-transferase	Glutathione metabolism (ko00480)	Glutathione S-transferase, N-terminal domain	Probable glutathione S-transferase parA OS=Nicotiana tabacum OX=4097 GN=PARA PE=2 SV=1	Posttranslational modification, protein turnover, chaperones	Glutathione S-transferase [Actinidia chinensis var. chinensis]		VaccDscaff22-augustus-gene-171.37	--	--	--	Late embryogenesis abundant (LEA) group 1	Late embryogenesis abundant protein 18 OS=Arabidopsis thaliana OX=3702 GN=LEA18 PE=2 SV=1	Function unknown	hypothetical protein C3L33_08777, partial [Rhododendron williamsianum]
VaccDscaff19-augustus-gene-63.36	--	K09184|7.4e-29|vvi:104879571|K09184 GATA-binding protein, other eukaryote | (RefSeq) GATA transcription factor 8	--	GATA zinc finger	GATA transcription factor 8 OS=Arabidopsis thaliana OX=3702 GN=GATA8 PE=1 SV=1	Transcription	hypothetical protein C3L33_16764, partial [Rhododendron williamsianum]		VaccDscaff14-augustus-gene-26.25	Coenzyme transport and metabolism	K23872|5.5e-142|egu:105043413|K23872 putative homogalacturonan methyltransferase [EC:2.1.1.-] | (RefSeq) probable methyltransferase PMT13 isoform X1	--	Putative S-adenosyl-L-methionine-dependent methyltransferase	Probable methyltransferase PMT21 OS=Arabidopsis thaliana OX=3702 GN=ERD3 PE=2 SV=1	Function unknown	Methyltransferase [Actinidia chinensis var. chinensis]		VaccDscaff6-augustus-gene-334.21	--	--	--	PLAT/LH2 domain	PLAT domain-containing protein 1 OS=Arabidopsis thaliana OX=3702 GN=PLAT1 PE=1 SV=1	Function unknown	hypothetical protein C3L33_18126, partial [Rhododendron williamsianum]
VaccDscaff11-processed-gene-278.6	--	--	--	--	--	--	hypothetical protein CRG98_038143 [Punica granatum]		VaccDscaff35-snap-gene-130.36	Nucleotide transport and metabolism	K14611|1.2e-57|nau:109231653|K14611 solute carrier family 23 (nucleobase transporter), member 1 | (RefSeq) nucleobase-ascorbate transporter 6	--	Permease family	Nucleobase-ascorbate transporter 2 OS=Arabidopsis thaliana OX=3702 GN=NAT2 PE=2 SV=2	Nucleotide transport and metabolism	hypothetical protein C3L33_15599, partial [Rhododendron williamsianum]		VaccDscaff41-augustus-gene-47.23	--	--	--	--	Cold-regulated protein 27 OS=Arabidopsis thaliana OX=3702 GN=COR27 PE=1 SV=1	Function unknown	hypothetical protein C3L33_10941, partial [Rhododendron williamsianum]
VaccDscaff32-snap-gene-276.25	General function prediction only	--	--	Protein of unknown function (DUF1295)	--	Posttranslational modification, protein turnover, chaperones	PREDICTED: uncharacterized protein LOC100853969 isoform X1 [Vitis vinifera]		VaccDscaff24-augustus-gene-54.43	--	K02184|3.0e-176|ini:109182789|K02184 formin 2 | (RefSeq) formin-like protein 1	--	Formin Homology 2 Domain	Formin-like protein 1 OS=Arabidopsis thaliana OX=3702 GN=FH1 PE=1 SV=1	--	hypothetical protein C3L33_07217, partial [Rhododendron williamsianum]		VaccDscaff4-augustus-gene-423.38	--	K10418|2.5e-44|nau:109228825|K10418 dynein light chain LC8-type | (RefSeq) dynein light chain LC6, flagellar outer arm-like	--	Dynein light chain type 1	--	Function unknown	hypothetical protein C3L33_14642, partial [Rhododendron williamsianum]
VaccDscaff28-augustus-gene-340.35	Amino acid transport and metabolism	K00264|0.0e+00|hbr:110666168|K00264 glutamate synthase (NADH) [EC:1.4.1.14] | (RefSeq) glutamate synthase 1 [NADH], chloroplastic isoform X1	Alanine, aspartate and glutamate metabolism (ko00250);; Nitrogen metabolism (ko00910);; Biosynthesis of amino acids (ko01230)	Glutamine amidotransferases class-II	Glutamate synthase 1 [NADH], chloroplastic OS=Arabidopsis thaliana OX=3702 GN=GLT1 PE=1 SV=2	Amino acid transport and metabolism	hypothetical protein C3L33_16363, partial [Rhododendron williamsianum]		VaccDscaff35-augustus-gene-261.42	Defense mechanisms	K16904|2.5e-52|qsu:112033473|K16904 dCTP diphosphatase [EC:3.6.1.12] | (RefSeq) dCTP pyrophosphatase 1-like	Pyrimidine metabolism (ko00240)	MazG-like family	--	Function unknown	hypothetical protein C3L33_14248, partial [Rhododendron williamsianum]		VaccDscaff9-augustus-gene-283.34	--	K03860|7.6e-07|nnu:104608881|K03860 phosphatidylinositol N-acetylglucosaminyltransferase subunit Q | (RefSeq) N-acetylglucosaminyl-phosphatidylinositol biosynthetic protein gpi1-like	Glycosylphosphatidylinositol (GPI)-anchor biosynthesis (ko00563)	Gibberellin regulated protein	Snakin-2 OS=Solanum tuberosum OX=4113 GN=SN2 PE=1 SV=1	Function unknown	snakin-2-like [Camellia sinensis]
VaccDscaff39-augustus-gene-262.38	--	K16900|1.0e-46|vvi:100233073|K16900 two pore calcium channel protein, plant | (RefSeq) TPC1; two pore channel 1	--	Ion transport protein	Two pore calcium channel protein 1B OS=Nicotiana tabacum OX=4097 GN=TPC1B PE=2 SV=1	--	hypothetical protein F2P56_001953 [Juglans regia]		VaccDscaff8-augustus-gene-15.20	Signal transduction mechanisms	K00924|4.1e-71|smo:SELMODRAFT_165220|K00924 kinase [EC:2.7.1.-] | (RefSeq) hypothetical protein	--	Leucine rich repeat	LRR receptor-like serine/threonine-protein kinase OS=Arabidopsis thaliana OX=3702 GN=RGI3 PE=1 SV=1	Signal transduction mechanisms	LRR receptor-like serine/threonine-protein kinase [Camellia sinensis]		VaccDscaff22-processed-gene-76.4	--	--	--	--	--	Function unknown	Transcription termination factor like [Actinidia chinensis var. chinensis]
VaccDscaff18-augustus-gene-258.26	--	K04498|7.4e-12|tcc:18602114|K04498 E1A/CREB-binding protein [EC:2.3.1.48] | (RefSeq) histone acetyltransferase HAC12	--	TAZ zinc finger	BTB/POZ and TAZ domain-containing protein 4 OS=Arabidopsis thaliana OX=3702 GN=BT4 PE=1 SV=1	Transcription	BTB/POZ and TAZ domain-containing protein [Actinidia chinensis var. chinensis]		VaccDscaff38-snap-gene-242.14	Carbohydrate transport and metabolism	K08235|1.4e-125|sind:105178525|K08235 xyloglucan:xyloglucosyl transferase [EC:2.4.1.207] | (RefSeq) xyloglucan endotransglucosylase/hydrolase protein 9	--	Glycosyl hydrolases family 16	Xyloglucan endotransglucosylase/hydrolase protein 9 OS=Arabidopsis thaliana OX=3702 GN=XTH9 PE=2 SV=2	Carbohydrate transport and metabolism	hypothetical protein C3L33_10328, partial [Rhododendron williamsianum]		VaccDscaff6-snap-gene-315.22	Secondary metabolites biosynthesis, transport and catabolism;; Defense mechanisms	K15405|4.0e-141|csat:104750245|K15405 midchain alkane hydroxylase | (RefSeq) alkane hydroxylase MAH1-like	Cutin, suberine and wax biosynthesis (ko00073)	Cytochrome P450	Alkane hydroxylase MAH1 OS=Arabidopsis thaliana OX=3702 GN=CYP96A15 PE=2 SV=1	Secondary metabolites biosynthesis, transport and catabolism	Alkane hydroxylase [Actinidia chinensis var. chinensis]
VaccDscaff88-augustus-gene-3.27	--	K00430|4.1e-110|egr:104419952|K00430 peroxidase [EC:1.11.1.7] | (RefSeq) lignin-forming anionic peroxidase-like	Phenylpropanoid biosynthesis (ko00940)	Peroxidase	Lignin-forming anionic peroxidase OS=Nicotiana sylvestris OX=4096 PE=2 SV=1	Secondary metabolites biosynthesis, transport and catabolism	Lignin-forming anionic peroxidase [Actinidia chinensis var. chinensis]		VaccDscaff2-processed-gene-237.2	--	K00109|2.6e-29|obr:102718692|K00109 2-hydroxyglutarate dehydrogenase [EC:1.1.99.2] | (RefSeq) L-2-hydroxyglutarate dehydrogenase, mitochondrial	Butanoate metabolism (ko00650)	Leucine rich repeat N-terminal domain	Leucine-rich repeat protein 1 OS=Arabidopsis thaliana OX=3702 GN=LRR1 PE=1 SV=1	Function unknown	hypothetical protein TEA_018791 [Camellia sinensis var. sinensis]		VaccDscaff23-processed-gene-201.3	--	K11253|1.4e-66|adu:107470357|K11253 histone H3 | (RefSeq) histone H3.2	--	Core histone H2A/H2B/H3/H4	Histone H3.2 OS=Arabidopsis thaliana OX=3702 GN=HTR2 PE=1 SV=2	Chromatin structure and dynamics	Histone superfamily protein [Theobroma cacao]
VaccDscaff21-augustus-gene-22.26	Carbohydrate transport and metabolism	K08150|7.8e-57|vvi:100268023|K08150 MFS transporter, SP family, solute carrier family 2 (myo-inositol transporter), member 13 | (RefSeq) INT1; inositol transporter 1	--	Sugar (and other) transporter	D-xylose-proton symporter-like 2 OS=Arabidopsis thaliana OX=3702 GN=At5g17010 PE=1 SV=1	Transcription	hypothetical protein HYC85_001509 [Camellia sinensis]		VaccDscaff18-snap-gene-348.48	Carbohydrate transport and metabolism	K01728|1.5e-146|nau:109221032|K01728 pectate lyase [EC:4.2.2.2] | (RefSeq) probable pectate lyase P59	Pentose and glucuronate interconversions (ko00040)	Pectate lyase	Probable pectate lyase P59 OS=Solanum lycopersicum OX=4081 GN=LAT59 PE=2 SV=1	Carbohydrate transport and metabolism	hypothetical protein HYC85_029747 [Camellia sinensis]		VaccDscaff30-augustus-gene-94.25	Posttranslational modification, protein turnover, chaperones	K15333|2.6e-88|nsy:104224633|K15333 tRNA guanosine-2'-O-methyltransferase [EC:2.1.1.34] | (RefSeq) uncharacterized protein LOC104224633	--	Subtilase family	Subtilisin-like protease SBT1.6 OS=Arabidopsis thaliana OX=3702 GN=SBT1.6 PE=2 SV=1	Posttranslational modification, protein turnover, chaperones	Subtilisin-like protease [Actinidia chinensis var. chinensis]
VaccDscaff3-snap-gene-24.26		K22133|8.6e-91|egr:104443802|K22133 oxalate---CoA ligase [EC:6.2.1.8] | (RefSeq) oxalate--CoA ligase	Glyoxylate and dicarboxylate metabolism (ko00630)	Legume lectin domain	L-type lectin-domain containing receptor kinase IX.1 OS=Arabidopsis thaliana OX=3702 GN=LECRK91 PE=1 SV=1	Signal transduction mechanisms	Concanavalin A-like lectin/glucanase superfamily [Cynara cardunculus var. scolymus]		VaccDscaff11-augustus-gene-326.31	--	--	--	Protein of unknown function (DUF1635)	--	Function unknown	hypothetical protein C3L33_06957, partial [Rhododendron williamsianum]		VaccDscaff14-processed-gene-47.7	--	K19041|4.7e-56|cmax:111498996|K19041 E3 ubiquitin-protein ligase RNF38/44 [EC:2.3.2.27] | (RefSeq) RING-H2 finger protein ATL52-like	--	Ring finger domain	E3 ubiquitin-protein ligase Os04g0590900 OS=Oryza sativa subsp. japonica OX=39947 GN=Os04g0590900 PE=2 SV=2	Posttranslational modification, protein turnover, chaperones	hypothetical protein C3L33_21907, partial [Rhododendron williamsianum]
VaccDscaff28-processed-gene-323.10	--	--	--	--	--	--	Cytochrome c biosynthesis protein [Actinidia chinensis var. chinensis]		VaccDscaff9-augustus-gene-411.45	--	--	--	--	Uncharacterized membrane protein At1g16860 OS=Arabidopsis thaliana OX=3702 GN=At1g16860 PE=1 SV=1	Function unknown	hypothetical protein CEY00_Acc12892 [Actinidia chinensis var. chinensis]		VaccDscaff12-augustus-gene-100.18	--	K14505|1.5e-115|dzi:111314860|K14505 cyclin D3, plant | (RefSeq) cyclin-D3-1-like	Plant hormone signal transduction (ko04075)	Cyclin, N-terminal domain	Cyclin-D3-3 OS=Arabidopsis thaliana OX=3702 GN=CYCD3-3 PE=2 SV=1	Cell cycle control, cell division, chromosome partitioning	cyclin D3 [Vaccinium corymbosum]
VaccDscaff30-snap-gene-256.37	Posttranslational modification, protein turnover, chaperones	K11414|1.8e-63|qsu:112032808|K11414 NAD+-dependent protein deacetylase sirtuin 4 [EC:2.3.1.286] | (RefSeq) NAD-dependent protein deacylase SRT2 isoform X1	Nicotinate and nicotinamide metabolism (ko00760)	Sir2 family	NAD-dependent protein deacylase SRT2 OS=Arabidopsis thaliana OX=3702 GN=SRT2 PE=2 SV=1	--	hypothetical protein F0562_005926 [Nyssa sinensis]		VaccDscaff43-processed-gene-119.34	--	--	--	--	Interactor of constitutive active ROPs 3 OS=Arabidopsis thaliana OX=3702 GN=ICR3 PE=1 SV=1	Function unknown	hypothetical protein C3L33_04622, partial [Rhododendron williamsianum]		NewGene_15469	--	K03006|7.29e-89|adu:107466525|K03006 DNA-directed RNA polymerase II subunit RPB1 [EC:2.7.7.6] | (RefSeq) LOW QUALITY PROTEIN: DNA-directed RNA polymerase II subunit 1-like	RNA polymerase (ko03020)	gag-polypeptide of LTR copia-type	Retrovirus-related Pol polyprotein from transposon RE2 OS=Arabidopsis thaliana OX=3702 GN=RE2 PE=4 SV=1	Replication, recombination and repair	Endonuclease [Actinidia chinensis var. chinensis]
VaccDscaff16-snap-gene-246.21	Replication, recombination and repair	K01669|1.6e-228|pmum:103319988|K01669 deoxyribodipyrimidine photo-lyase [EC:4.1.99.3] | (RefSeq) cryptochrome DASH, chloroplastic/mitochondrial	--	FAD binding domain of DNA photolyase	Cryptochrome DASH, chloroplastic/mitochondrial OS=Solanum lycopersicum OX=4081 GN=CRYD PE=2 SV=2	--	Cryptochrome DASH like [Actinidia chinensis var. chinensis]		VaccDscaff39-augustus-gene-22.29	Cell wall/membrane/envelope biogenesis	K03098|1.5e-95|qsu:112019869|K03098 apolipoprotein D and lipocalin family protein | (RefSeq) temperature-induced lipocalin-1	--	Lipocalin-like domain	Temperature-induced lipocalin-1 OS=Arabidopsis thaliana OX=3702 GN=TIL PE=1 SV=1	Cell wall/membrane/envelope biogenesis	temperature-induced lipocalin-1-like [Camellia sinensis]		VaccDscaff3-snap-gene-6.50	Secondary metabolites biosynthesis, transport and catabolism	K24028|4.9e-39|zju:107423822|K24028 salicylic acid 3-hydroxylase [EC:1.14.11.-] | (RefSeq) protein DMR6-LIKE OXYGENASE 2-like	--	2OG-Fe(II) oxygenase superfamily	Probable 2-oxoglutarate-dependent dioxygenase JRG21 OS=Arabidopsis thaliana OX=3702 GN=JRG21 PE=2 SV=1	Function unknown	Protein DMR6-LIKE OXYGENASE 2 like [Actinidia chinensis var. chinensis]
VaccDscaff22-augustus-gene-15.21	--	K13425|4.6e-87|spen:107007610|K13425 WRKY transcription factor 22 | (RefSeq) WRKY transcription factor 22-like	MAPK signaling pathway - plant (ko04016);; Plant-pathogen interaction (ko04626)	WRKY DNA -binding domain	WRKY transcription factor 22 OS=Arabidopsis thaliana OX=3702 GN=WRKY22 PE=2 SV=1	Transcription	hypothetical protein C3L33_07927, partial [Rhododendron williamsianum]		VaccDscaff5-augustus-gene-52.28	--	K07374|2.2e-257|dzi:111281785|K07374 tubulin alpha | (RefSeq) tubulin alpha-2 chain	Phagosome (ko04145)	Tubulin/FtsZ family, GTPase domain	Tubulin alpha chain OS=Prunus dulcis OX=3755 GN=TUBA PE=2 SV=1	Cytoskeleton	hypothetical protein CBR_g11996 [Chara braunii]		VaccDscaff4-processed-gene-426.13	--	K17302|1.1e-73|peq:110037062|K17302 coatomer subunit beta' | (RefSeq) coatomer subunit beta'-1-like	--	WD domain, G-beta repeat	Coatomer subunit beta'-2 OS=Oryza sativa subsp. japonica OX=39947 GN=Os02g0209100 PE=2 SV=1	Function unknown	hypothetical protein TEA_007076 [Camellia sinensis var. sinensis]
VaccDscaff17-processed-gene-266.21	--	--	--	--	--	Replication, recombination and repair	uncharacterized protein LOC112020187 [Quercus suber]		VaccDscaff15-augustus-gene-17.25	--	--	--	Neprosin	--	Function unknown	hypothetical protein C3L33_05749, partial [Rhododendron williamsianum]		VaccDscaff33-snap-gene-138.29	--	K23877|3.5e-41|csat:104750868|K23877 xyloglucan O-acetyltransferase | (RefSeq) protein ALTERED XYLOGLUCAN 4-like	--	GDSL/SGNH-like Acyl-Esterase family found in Pmr5 and Cas1p	Protein trichome birefringence-like 36 OS=Arabidopsis thaliana OX=3702 GN=TBL36 PE=2 SV=1	Function unknown	protein trichome birefringence-like 36 [Camellia sinensis]
VaccDscaff27-augustus-gene-286.23	Signal transduction mechanisms	K13447|0.0e+00|ccav:112511051|K13447 respiratory burst oxidase [EC:1.6.3.- 1.11.1.-] | (RefSeq) respiratory burst oxidase homolog protein C-like	MAPK signaling pathway - plant (ko04016);; Plant-pathogen interaction (ko04626)	Ferric reductase NAD binding domain	Respiratory burst oxidase homolog protein C OS=Solanum tuberosum OX=4113 GN=RBOHC PE=1 SV=2	--	hypothetical protein TEA_010635 [Camellia sinensis var. sinensis]		VaccDscaff33-augustus-gene-299.38	--	K12811|7.0e-26|bna:106427234|K12811 ATP-dependent RNA helicase DDX46/PRP5 [EC:3.6.4.13] | (RefSeq) uncharacterized protein LOC106427234	Spliceosome (ko03040)	Weak chloroplast movement under blue light	WEB family protein At5g16730, chloroplastic OS=Arabidopsis thaliana OX=3702 GN=At5g16730 PE=1 SV=1	Function unknown	WEB family protein At3g02930, chloroplastic-like isoform X1 [Camellia sinensis]		VaccDscaff40-augustus-gene-206.21	Posttranslational modification, protein turnover, chaperones	K15333|4.9e-186|nsy:104224633|K15333 tRNA guanosine-2'-O-methyltransferase [EC:2.1.1.34] | (RefSeq) uncharacterized protein LOC104224633	--	Subtilase family	Subtilisin-like protease SBT2.6 OS=Arabidopsis thaliana OX=3702 GN=SBT2.6 PE=2 SV=1	Posttranslational modification, protein turnover, chaperones	Subtilisin-like protease [Actinidia chinensis var. chinensis]
VaccDscaff9-processed-gene-182.6	Replication, recombination and repair	K08332|3.4e-11|cpap:110808679|K08332 vacuolar protein 8 | (RefSeq) LOW QUALITY PROTEIN: U-box domain-containing protein 3	--	U-box domain	U-box domain-containing protein 17 OS=Arabidopsis thaliana OX=3702 GN=PUB17 PE=2 SV=1	Function unknown	hypothetical protein C3L33_16252, partial [Rhododendron williamsianum]		VaccDscaff3-augustus-gene-402.29	Coenzyme transport and metabolism	K23872|5.5e-142|egu:105043413|K23872 putative homogalacturonan methyltransferase [EC:2.1.1.-] | (RefSeq) probable methyltransferase PMT13 isoform X1	--	Putative S-adenosyl-L-methionine-dependent methyltransferase	Probable methyltransferase PMT21 OS=Arabidopsis thaliana OX=3702 GN=ERD3 PE=2 SV=1	Function unknown	Methyltransferase [Actinidia chinensis var. chinensis]		VaccDscaff3-augustus-gene-58.33	--	--	--	Cupin	Germin-like protein subfamily 2 member 1 OS=Arabidopsis thaliana OX=3702 GN=GLP4 PE=2 SV=2	Function unknown	hypothetical protein C3L33_21363, partial [Rhododendron williamsianum]
VaccDscaff25-augustus-gene-278.21	Secondary metabolites biosynthesis, transport and catabolism	K22374|7.8e-143|nau:109243613|K22374 3''-deamino-3''-oxonicotianamine reductase [EC:1.1.1.285] | (RefSeq) non-functional NADPH-dependent codeinone reductase 2-like	--	Aldo/keto reductase family	Non-functional NADPH-dependent codeinone reductase 2 OS=Papaver somniferum OX=3469 GN=COR2 PE=1 SV=1	Function unknown	hypothetical protein C3L33_13546, partial [Rhododendron williamsianum]		VaccDscaff4-processed-gene-21.18	--	K08511|7.1e-83|vvi:100254439|K08511 vesicle-associated membrane protein 72 | (RefSeq) vesicle-associated membrane protein 724	--	Synaptobrevin	Vesicle-associated membrane protein 724 OS=Arabidopsis thaliana OX=3702 GN=VAMP724 PE=2 SV=2	Intracellular trafficking, secretion, and vesicular transport	vesicle-associated membrane protein 724 [Camellia sinensis]		VaccDscaff5-snap-gene-237.35	Translation, ribosomal structure and biogenesis	K11294|7.3e-92|cit:102621789|K11294 nucleolin | (RefSeq) RNA-binding protein CP29B, chloroplastic	--	RNA recognition motif. (a.k.a. RRM, RBD, or RNP domain)	29 kDa ribonucleoprotein A, chloroplastic OS=Nicotiana sylvestris OX=4096 PE=2 SV=1	Function unknown	hypothetical protein C3L33_12404, partial [Rhododendron williamsianum]
VaccDscaff47-snap-gene-56.19	Defense mechanisms	K08712|1.8e-121|gsl:Gasu_29800|K08712 ATP-binding cassette, subfamily G (WHITE), member 2, SNQ2 | (RefSeq) ABC transporter, ATP-binding protein	ABC transporters (ko02010)	ABC-2 type transporter	Pleiotropic drug resistance protein 2 OS=Nicotiana plumbaginifolia OX=4092 GN=PDR2 PE=2 SV=1	Secondary metabolites biosynthesis, transport and catabolism	Pleiotropic drug resistance protein [Actinidia chinensis var. chinensis]		VaccDscaff35-processed-gene-220.9	Carbohydrate transport and metabolism	--	--	Glucose / Sorbosone dehydrogenase	HIPL1 protein OS=Arabidopsis thaliana OX=3702 GN=HIPL1 PE=3 SV=2	Carbohydrate transport and metabolism	HIPL1 protein [Actinidia chinensis var. chinensis]		VaccDscaff19-augustus-gene-355.43	--	--	--	--	--	Function unknown	hypothetical protein C3L33_07016, partial [Rhododendron williamsianum]
VaccDscaff9-snap-gene-55.32	--	--	--	EF-hand domain pair	--	Signal transduction mechanisms	Calmodulin like [Actinidia chinensis var. chinensis]		VaccDscaff15-processed-gene-242.4	Energy production and conversion	K22395|1.2e-177|cmax:111489931|K22395 cinnamyl-alcohol dehydrogenase [EC:1.1.1.195] | (RefSeq) berberine bridge enzyme-like 15	Phenylpropanoid biosynthesis (ko00940)	FAD binding domain	Berberine bridge enzyme-like 15 OS=Arabidopsis thaliana OX=3702 GN=MEE23 PE=1 SV=1	Energy production and conversion	daurichromenic acid synthase like protein1 [Rhododendron dauricum]		VaccDscaff19-augustus-gene-269.27	--	K00430|5.7e-173|hbr:110640129|K00430 peroxidase [EC:1.11.1.7] | (RefSeq) peroxidase 42-like	Phenylpropanoid biosynthesis (ko00940)	Peroxidase	Peroxidase 42 OS=Arabidopsis thaliana OX=3702 GN=PER42 PE=1 SV=2	Carbohydrate transport and metabolism	hypothetical protein C3L33_06419, partial [Rhododendron williamsianum]
VaccDscaff27-processed-gene-336.20	--	--	--	--	Protein NEGATIVE GRAVITROPIC RESPONSE OF ROOTS OS=Medicago truncatula OX=3880 GN=NGR PE=2 SV=1	--	hypothetical protein C3L33_00109, partial [Rhododendron williamsianum]		VaccDscaff3-snap-gene-213.32	Carbohydrate transport and metabolism	K00083|6.1e-168|vvi:100244482|K00083 cinnamyl-alcohol dehydrogenase [EC:1.1.1.195] | (RefSeq) probable cinnamyl alcohol dehydrogenase 1	Phenylpropanoid biosynthesis (ko00940)	Alcohol dehydrogenase GroES-like domain	Probable cinnamyl alcohol dehydrogenase 1 OS=Arabidopsis thaliana OX=3702 GN=CAD1 PE=2 SV=1	Secondary metabolites biosynthesis, transport and catabolism	unnamed protein product, partial [Vitis vinifera]		VaccDscaff2-processed-gene-377.39	General function prediction only	K23948|6.0e-22|mpp:MICPUCDRAFT_45888|K23948 NADH:quinone reductase (non-electrogenic) [EC:1.6.5.9] | (RefSeq) hypothetical protein	--	Nitronate monooxygenase	--	Function unknown	hypothetical protein C3L33_21136, partial [Rhododendron williamsianum]
VaccDscaff30-snap-gene-115.57	Lipid transport and metabolism	K13396|1.1e-76|psom:113295244|K13396 (S)-tetrahydroprotoberberine N-methyltransferase [EC:2.1.1.122] | (RefSeq) (S)-tetrahydroprotoberberine N-methyltransferase	Isoquinoline alkaloid biosynthesis (ko00950)	Mycolic acid cyclopropane synthetase	(S)-coclaurine N-methyltransferase OS=Thalictrum flavum subsp. glaucum OX=150095 PE=1 SV=1	Cell wall/membrane/envelope biogenesis	(S)-coclaurine N-methyltransferase [Actinidia chinensis var. chinensis]		VaccDscaff22-processed-gene-13.1	--	--	--	Late embryogenesis abundant protein	--	Function unknown	hypothetical protein C3L33_07918, partial [Rhododendron williamsianum]		VaccDscaff47-processed-gene-55.8	Secondary metabolites biosynthesis, transport and catabolism;; Defense mechanisms	K20624|9.6e-209|qsu:111986161|K20624 12-hydroxyjasmonoyl-L-amino acid 12-hydroxylase / fatty acid hydroxylase [EC:1.14.14.49] | (RefSeq) cytochrome P450 94C1-like	--	Cytochrome P450	Cytochrome P450 94C1 OS=Arabidopsis thaliana OX=3702 GN=CYP94C1 PE=1 SV=1	Secondary metabolites biosynthesis, transport and catabolism	hypothetical protein HYC85_032000 [Camellia sinensis]
VaccDscaff35-augustus-gene-283.35	Cell motility;; Extracellular structures	K17592|0.0e+00|sita:101760663|K17592 sacsin | (RefSeq) uncharacterized protein LOC101760663	--	--	Protein NO VEIN OS=Arabidopsis thaliana OX=3702 GN=NOV PE=1 SV=1	--	hypothetical protein C3L33_14480, partial [Rhododendron williamsianum]		VaccDscaff14-snap-gene-279.22	Cell cycle control, cell division, chromosome partitioning;; Inorganic ion transport and metabolism;; Cell wall/membrane/envelope biogenesis	K05909|1.4e-245|vvi:100259656|K05909 laccase [EC:1.10.3.2] | (RefSeq) laccase-14	--	Multicopper oxidase	Laccase-14 OS=Arabidopsis thaliana OX=3702 GN=LAC14 PE=2 SV=1	Secondary metabolites biosynthesis, transport and catabolism	hypothetical protein C3L33_21932, partial [Rhododendron williamsianum]		VaccDscaff18-augustus-gene-20.19	--	K17500|4.2e-110|nto:104085001|K17500 integrin-linked kinase-associated serine/threonine phosphatase 2C [EC:3.1.3.16] | (RefSeq) WAT1-related protein At3g18200 isoform X1	--	EamA-like transporter family	Protein WALLS ARE THIN 1 OS=Arabidopsis thaliana OX=3702 GN=WAT1 PE=1 SV=1	Function unknown	Protein WALLS ARE THIN like [Actinidia chinensis var. chinensis]
VaccDscaff23-processed-gene-64.0	--	--	--	Leucine rich repeat	Leucine-rich repeat extensin-like protein 2 OS=Arabidopsis thaliana OX=3702 GN=LRX2 PE=1 SV=1	Function unknown	hypothetical protein C3L33_05254, partial [Rhododendron williamsianum]		VaccDscaff29-augustus-gene-132.36	--	K20728|2.2e-08|bna:106380061|K20728 vegetative storage protein 2 | (RefSeq) vegetative storage protein 2	MAPK signaling pathway - plant (ko04016)	HAD superfamily, subfamily IIIB (Acid phosphatase)	Uncharacterized protein At2g39920 OS=Arabidopsis thaliana OX=3702 GN=At2g39920 PE=2 SV=2	Function unknown	hypothetical protein C3L33_02857, partial [Rhododendron williamsianum]		VaccDscaff148-augustus-gene-0.14	--	K03695|4.2e-09|vvi:100232966|K03695 ATP-dependent Clp protease ATP-binding subunit ClpB | (RefSeq) HSP101; heat shock protein 101	--	--	Protein SMAX1-LIKE 4 OS=Arabidopsis thaliana OX=3702 GN=SMXL4 PE=1 SV=1	Posttranslational modification, protein turnover, chaperones	hypothetical protein C3L33_03864, partial [Rhododendron williamsianum]
VaccDscaff5-augustus-gene-270.20	Coenzyme transport and metabolism	K03403|0.0e+00|gra:105799490|K03403 magnesium chelatase subunit H [EC:6.6.1.1] | (RefSeq) magnesium-chelatase subunit ChlH, chloroplastic	Porphyrin and chlorophyll metabolism (ko00860)	CobN/Magnesium Chelatase	Magnesium-chelatase subunit ChlH, chloroplastic OS=Arabidopsis thaliana OX=3702 GN=CHLH PE=1 SV=1	Coenzyme transport and metabolism	Magnesium-chelatase subunit ChlH like [Actinidia chinensis var. chinensis]		VaccDscaff11-processed-gene-391.5	--	--	--	--	--	--	hypothetical protein C3L33_07648, partial [Rhododendron williamsianum]		VaccDscaff2-augustus-gene-404.31	--	--	--	--	--	--	hypothetical protein CK203_078868 [Vitis vinifera]
VaccDscaff17-augustus-gene-170.27	Amino acid transport and metabolism	K01738|2.0e-150|jcu:105647650|K01738 cysteine synthase [EC:2.5.1.47] | (RefSeq) cysteine synthase	Cysteine and methionine metabolism (ko00270);; Sulfur metabolism (ko00920);; Carbon metabolism (ko01200);; Biosynthesis of amino acids (ko01230)	Pyridoxal-phosphate dependent enzyme	Cysteine synthase OS=Citrullus lanatus OX=3654 PE=1 SV=1	Amino acid transport and metabolism	hypothetical protein C3L33_05856, partial [Rhododendron williamsianum]		VaccDscaff17-augustus-gene-236.20	--	K18422|3.7e-161|dcr:108196287|K18422 helicase MOV-10 [EC:3.6.4.13] | (RefSeq) probable RNA helicase SDE3	--	--	--	RNA processing and modification	RNA helicase SDE3 [Actinidia chinensis var. chinensis]		VaccDscaff22-processed-gene-49.1	Carbohydrate transport and metabolism	K08237|1.3e-167|dzi:111304821|K08237 hydroquinone glucosyltransferase [EC:2.4.1.218] | (RefSeq) hydroquinone glucosyltransferase-like	--	UDP-glucoronosyl and UDP-glucosyl transferase	Hydroquinone glucosyltransferase OS=Rauvolfia serpentina OX=4060 GN=AS PE=1 SV=1	Function unknown	hypothetical protein C3L33_22194, partial [Rhododendron williamsianum]
VaccDscaff1617-snap-gene-0.4	--	K13425|3.2e-88|spen:107007610|K13425 WRKY transcription factor 22 | (RefSeq) WRKY transcription factor 22-like	MAPK signaling pathway - plant (ko04016);; Plant-pathogen interaction (ko04626)	WRKY DNA -binding domain	WRKY transcription factor 22 OS=Arabidopsis thaliana OX=3702 GN=WRKY22 PE=2 SV=1	Transcription	hypothetical protein C3L33_07927, partial [Rhododendron williamsianum]		VaccDscaff59-snap-gene-3.27	General function prediction only	--	--	Protein of unknown function (DUF1295)	--	Function unknown	hypothetical protein C3L33_04914, partial [Rhododendron williamsianum]		VaccDscaff18-processed-gene-10.9	Amino acid transport and metabolism	K01322|0.0e+00|qsu:112006748|K01322 prolyl oligopeptidase [EC:3.4.21.26] | (RefSeq) prolyl endopeptidase-like isoform X1	--	Prolyl oligopeptidase, N-terminal beta-propeller domain	--	Amino acid transport and metabolism	prolyl endopeptidase-like [Camellia sinensis]
VaccDscaff5-augustus-gene-395.33	Amino acid transport and metabolism	K00815|2.6e-191|mesc:110611399|K00815 tyrosine aminotransferase [EC:2.6.1.5] | (RefSeq) probable aminotransferase TAT2	Ubiquinone and other terpenoid-quinone biosynthesis (ko00130);; Cysteine and methionine metabolism (ko00270);; Tyrosine metabolism (ko00350);; Phenylalanine metabolism (ko00360);; Phenylalanine, tyrosine and tryptophan biosynthesis (ko00400);; Isoquinoline alkaloid biosynthesis (ko00950);; Tropane, piperidine and pyridine alkaloid biosynthesis (ko00960)	Aminotransferase class I and II	Probable aminotransferase TAT2 OS=Arabidopsis thaliana OX=3702 GN=At5g53970 PE=2 SV=1	Amino acid transport and metabolism	aromatic amino acid aminotransferase 1 [Camellia sinensis]		VaccDscaff35-augustus-gene-97.25	--	--	--	--	--	--	hypothetical protein C3L33_15478, partial [Rhododendron williamsianum]		VaccDscaff41-augustus-gene-144.15	--	K21630|7.1e-28|cmax:111478040|K21630 GATA-type zinc finger protein 1 | (RefSeq) GATA transcription factor 6-like	--	GATA zinc finger	GATA transcription factor 4 OS=Arabidopsis thaliana OX=3702 GN=GATA4 PE=2 SV=1	Transcription	hypothetical protein F0562_019081 [Nyssa sinensis]
VaccDscaff23-processed-gene-71.22	Secondary metabolites biosynthesis, transport and catabolism;; Defense mechanisms	K07426|5.7e-173|cpep:111792333|K07426 cytochrome P450 family 4 subfamily B polypeptide 1 [EC:1.14.14.1] | (RefSeq) cytochrome P450 CYP72A219-like	--	Cytochrome P450	Cytochrome P450 CYP72A219 OS=Panax ginseng OX=4054 PE=2 SV=1	Secondary metabolites biosynthesis, transport and catabolism	cytochrome P450 CYP72A219-like [Camellia sinensis]		VaccDscaff32-processed-gene-250.4	--	K09286|2.2e-49|ini:109189121|K09286 EREBP-like factor | (RefSeq) ethylene-responsive transcription factor RAP2-9-like	--	AP2 domain	Ethylene-responsive transcription factor ERF008 OS=Arabidopsis thaliana OX=3702 GN=ERF008 PE=2 SV=1	Transcription	hypothetical protein C3L33_01258, partial [Rhododendron williamsianum]		VaccDscaff35-augustus-gene-168.29	--	K17616|1.3e-54|oeu:111404463|K17616 CTD small phosphatase-like protein 2 [EC:3.1.3.-] | (RefSeq) uncharacterized protein LOC111404463	--	Rubber elongation factor protein (REF)	REF/SRPP-like protein At1g67360 OS=Arabidopsis thaliana OX=3702 GN=At1g67360 PE=2 SV=1	Function unknown	hypothetical protein C3L33_13859, partial [Rhododendron williamsianum]
VaccDscaff23-processed-gene-169.16	--	--	--	NPH3 family	BTB/POZ domain-containing protein At5g17580 OS=Arabidopsis thaliana OX=3702 GN=At5g17580 PE=2 SV=1	Function unknown	hypothetical protein C3L33_13692, partial [Rhododendron williamsianum]		VaccDscaff39-augustus-gene-277.27	--	K13459|3.6e-119|vvi:104880792|K13459 disease resistance protein RPS2 | (RefSeq) probable disease resistance protein At4g27220	Plant-pathogen interaction (ko04626)	NB-ARC domain	Disease resistance protein At4g27190 OS=Arabidopsis thaliana OX=3702 GN=At4g27190 PE=2 SV=1	Signal transduction mechanisms	disease resistance protein At4g27190-like [Camellia sinensis]		VaccDscaff35-augustus-gene-35.34	--	--	--	Tesmin/TSO1-like CXC domain, cysteine-rich domain	Protein tesmin/TSO1-like CXC 2 OS=Arabidopsis thaliana OX=3702 GN=TCX2 PE=1 SV=1	Function unknown	hypothetical protein C3L33_14996, partial [Rhododendron williamsianum]
VaccDscaff51-processed-gene-2.10	Lipid transport and metabolism;; Secondary metabolites biosynthesis, transport and catabolism;; General function prediction only	K09841|8.7e-62|sot:102584670|K09841 xanthoxin dehydrogenase [EC:1.1.1.288] | (RefSeq) xanthoxin dehydrogenase-like	Carotenoid biosynthesis (ko00906)	Enoyl-(Acyl carrier protein) reductase	Short-chain dehydrogenase reductase 3b OS=Arabidopsis thaliana OX=3702 GN=SDR3b PE=2 SV=1	Secondary metabolites biosynthesis, transport and catabolism	hypothetical protein C3L33_07709, partial [Rhododendron williamsianum]		VaccDscaff30-processed-gene-123.4	--	K09060|7.2e-06|ats:109744298|K09060 plant G-box-binding factor | (RefSeq) LOC109744298; DNA-binding protein EMBP-1-like isoform X1	--	bZIP transcription factor	bZIP transcription factor 44 OS=Arabidopsis thaliana OX=3702 GN=BZIP44 PE=1 SV=1	Transcription	hypothetical protein C3L33_19809, partial [Rhododendron williamsianum]		NewGene_14596	--	K05359|3.84e-10|dcr:108223049|K05359 arogenate/prephenate dehydratase [EC:4.2.1.91 4.2.1.51] | (RefSeq) arogenate dehydratase/prephenate dehydratase 1, chloroplastic-like	Phenylalanine, tyrosine and tryptophan biosynthesis (ko00400);; Biosynthesis of amino acids (ko01230)	Protein of unknown function (DUF 659)	--	Function unknown	Flagellin [Actinidia chinensis var. chinensis]
VaccDscaff6-snap-gene-374.24	Carbohydrate transport and metabolism	K06617|0.0e+00|pop:7470076|K06617 raffinose synthase [EC:2.4.1.82] | (RefSeq) probable galactinol--sucrose galactosyltransferase 6	Galactose metabolism (ko00052)	Raffinose synthase or seed imbibition protein Sip1	Probable galactinol--sucrose galactosyltransferase 6 OS=Arabidopsis thaliana OX=3702 GN=RFS6 PE=2 SV=2	Function unknown	hypothetical protein C3L33_05408, partial [Rhododendron williamsianum]		VaccDscaff7-augustus-gene-286.23	Energy production and conversion	K01455|1.3e-275|nau:109208879|K01455 formamidase [EC:3.5.1.49] | (RefSeq) uncharacterized protein LOC109208879 isoform X1	Cyanoamino acid metabolism (ko00460);; Glyoxylate and dicarboxylate metabolism (ko00630);; Nitrogen metabolism (ko00910);; Carbon metabolism (ko01200)	Acetamidase/Formamidase family	--	Energy production and conversion	hypothetical protein CMV_016205 [Castanea mollissima]		VaccDscaff14-augustus-gene-256.32	--	K12130|1.3e-06|pper:18787728|K12130 pseudo-response regulator 5 | (RefSeq) two-component response regulator-like APRR9 isoform X2	Circadian rhythm - plant (ko04712)	CCT motif	Zinc finger protein CONSTANS-LIKE 16 OS=Arabidopsis thaliana OX=3702 GN=COL16 PE=1 SV=2	Transcription	hypothetical protein C3L33_13747, partial [Rhododendron williamsianum]
VaccDscaff2-snap-gene-59.29	--	K08488|1.6e-108|nau:109208310|K08488 syntaxin 7 | (RefSeq) syntaxin-22-like	SNARE interactions in vesicular transport (ko04130);; Phagosome (ko04145)	Syntaxin-like protein	Syntaxin-22 OS=Arabidopsis thaliana OX=3702 GN=SYP22 PE=1 SV=1	--	Syntaxin-22 like [Actinidia chinensis var. chinensis]		VaccDscaff41-augustus-gene-3.33	--	--	--	--	--	--	hypothetical protein C3L33_10740, partial [Rhododendron williamsianum]		VaccDscaff17-processed-gene-12.7	--	--	--	Late embryogenesis abundant protein	--	Function unknown	hypothetical protein C3L33_20590, partial [Rhododendron williamsianum]
[truncated: 1,853 more rows]

## Sheet: Table S6
Table S6 The differential expressed transcription factor screened from WGCNA kMEblue module under UV-B irradiation
[truncated: 98 more rows]

## Sheet: Table S7
Table S7 The differential expressed transcription factor screened from WGCNA kMEturquoise module under UV-B irradiation
[truncated: 81 more rows]

## Sheet: Table S8
Table S8 The differential expressed transcription factor screened from WGCNA kMEblue module under ABA treatment
[truncated: 51 more rows]

## Sheet: Table S9
Table S9 Pearson's correlation coefficients (r) of expression levels between USP genes and transcription factor genes under UV-B or ABA treatments from Weighted Gene Coexpression Network Analysis (WGCNA)
[truncated: 123 more rows]

## Sheet: Table S10
Table S10 Primers used for qRT- PCR
[truncated: 13 more rows]
